# Supplementary material for: Unraveling Stage-Dependent Expression Patterns of Circular RNAs and Their Related ceRNA Modulation in Ovine Postnatal Testis Development
Source: Front Cell Dev Biol. 2021 Mar 19;9:627439. doi: 10.3389/fcell.2021.627439 (PMC8017185; doi:10.3389/fcell.2021.627439)
Supplement: Supplementary Table 1 — RNA sequences used for transfection. [file Table_1.XLSX]

## Sheet: Table S1
Table S1 RNA sequences used for transfection.
Name	sequence (5'→3')
si1-circ_026259	UUGCACCACAGGACUUCCAAU
	AUUGGAAGUCCUGUGGUGCAA
si2-circ_026259	UUCUUGCACCACAGGACUUCC
	GGAAGUCCUGUGGUGCAAGAA
si-NC	UUCUCCGAACGUGUCACGUTT
	ACGUGACACGUUCGGAGAATT
oar-miR-29b inhibitor	ACACUGAUUUCAAAUGGUGCUA
oar-miR-29b inhibitor NC	CAGUACUUUUGUGUAGUACAA
oar-miR-29b mimic	UAGCACCAUUUGAAAUCAGUGU
	ACUGAUUUCAAAUGGUGCUAUU
oar-miR-29b mimic NC	UUCUCCGAACGUGUCACGUTT
	ACGUGACACGUUCGGAGAATT

## Sheet: Table S2
Table S2 A list of primers used in PCR analysis.
Gene name	Forward ( 5'→3' )	Reverse ( 5'→3' )	Amplicon (bp)
Circ_022634	ATTCTGCCTGATGTGTGGGTG	CTGGCTGGTTGATGGAGTGTT	173
Circ_007083	AACAATGGGCAAGGTCTAGG	CAAGTCAATCCTGTGGGCAAC	100
Circ_000904	GACTTTCTCCGTGGTATTTGCAT	GGCACTGAGGAATGACAACA	160
Circ_003197	AGATGAGTCCCAAGAAGCAGA	GAGCATAAACGCCAGTCCAA	156
Circ_019764	AGCATCCAACTCAGAACTTACTCC	TGCTGTTCAGTGGGTGTAGAAA	128
Circ_006879	TGTGACCTGTGTTTTCGTGTG	CGCCTGCCGTCTTTTTGTTA	145
Circ_029460	ACTTTCTCCCACAGACTCGC	GTCCCAGAGCTTTATCCCGT	156
Circ_022103	CCATCACAGCACAGTCCACAT	AGATTTTCCAACGCCTCCCG	153
Circ_019713	GCACATGAACGAGCATCACA	CCCTTCTAGACTGAACTGACTC	154
Circ_006127	GCTGAAAAGGAAGGTGTTGC	ATAGAGGAACATCACGGCGG	160
Circ_024949	CCATACAGAGAACACAAGAGCCT	GTCAATGAACTGGCACGTGTT	185
Circ_026259	CTTGGGTTCGTCATGATTTGGA	GCATGATTAAGGGCTTGGAAGAAT	173
IGF1	AGTCACATCCTCCTCGCATC	CTCCTCAGATCACAGCTCCG	237
KLHL5 (across exons)	AGCTTCACCCATCCAACTGT	TTGCAATTTCACTGGCTGGT	156
KLHL5 (single-exon)	GCCAGTGAAATTGCAAAGCTC	GGTGCAAGAAGAGGTAGCCTAA	161
Vimentin	ACCGAGTTCAAGAACACCCG	GACTTGCCCTGTCCCTTGAG	152
SOX9	CTGGAGACTGCTGAACGAGAG	AAGATGGCGTTGGGCGAGAT	186
β-actin	TATTGCTGCGCTCGTGGTTG	GTCAGGATGCCTCTCTTGCT	186
GAPDH	AGAAACCTGCCAAGTATGATG	TCGTACCAGGAAATGAGCTTG	196
Oar-miR-29b	TAGCACCATTTGAAATCAGTGTT	Universal reverse*	-
U6	GGAACGATACAGAGAAGATTAGC	TGGAACGCTTCACGAATTTGCG	-
*The reverse universal primer used for qRT-PCR amplification of miRNAs was provided by the manufacturer (Mir-XTM miRNA First-Strand Synthesis Kit, Takara, Japan).

## Sheet: Table S3
Table S3 Summary statistics of circular RNA sequencing data.
Sample	Raw reads	High-quality clean reads(%)	Reads unmapped to reference genome(%)	Anchors reads	Anchors reads mapped to reference genome(%)
3M_1	86686128	85776378 (98.95%)	13311428(15.52%)	26622856	22190814(83.35%)
3M_2	92873616	91945812 (99%)	13637894(14.83%)	27275788	22919517(84.03%)
3M_3	81045796	80300638 (99.08%)	11645588(14.50%)	23291176	19586501(84.09%)
3M_4	83913264	83181244 (99.13%)	12203293(14.67%)	24406586	20345106(83.36%)
1Y_1	80164904	78846662 (98.36%)	13467233(17.08%)	26934466	20950414(77.78%)
1Y_2	75591012	74153400 (98.1%)	12710782(17.14%)	25421564	19810952(77.93%)
1Y_3	79278738	77927550 (98.3%)	13658829(17.53%)	27317658	21050162(77.06%)
1Y_4	83808956	82399922 (98.32%)	14922070(18.11%)	29844140	22762245(76.27%)
3Y_1	83740912	81965368 (97.88%)	15848093(19.34%)	31696186	24048321(75.87%)
3Y_2	85260674	83971976 (98.49%)	15036987(17.91%)	30073974	23030960(76.58%)
3Y_3	89222682	87517422 (98.09%)	16927109(19.34%)	33854218	25674614(75.84%)
3Y_4	87941412	86669130 (98.55%)	15471338(17.85%)	30942676	23672149(76.5%)
3M, three-month-old; 1Y, one-year-old; 3Y, three-year-old. 3M_1, 3M_2, 3M_3, and 3M_4: four biological replicates for three-month-old testes; 1Y_1, 1Y_2, 1Y_3, and 1Y_4: four biological replicates for one-year-old testes; 3Y_1, 3Y_2, 3Y_3, and 3Y_4: four biological replicates for three-year-old testes.

## Sheet: Table S4
Table S4 List of differentially expressed circRNAs between 3M and 1Y.
id	3M_1_rpm	3M_2_rpm	3M_3_rpm	3M_4_rpm	1Y-1_rpm	1Y-2_rpm	1Y-3_rpm	1Y-4_rpm	3M_Mean_rpm	1Y_Mean_rpm	log2(FC)	Pvalue	FDR	source_gene	annot_type
Circ_000009	0	0	0	0	41.2348	26.7462	83.5731	14.9721	0.001	41.6316	15.3454	0.0144991	0.140783	101123521	exon_intron
Circ_000016	195.81	159.203	0	195.106	1182.07	1230.32	1074.51	1197.77	137.53	1171.17	3.09013	7.2535e-08	6.1327e-06	101101945	exon_intron
Circ_000017	0	0	0	27.8722	192.429	53.4924	71.6341	344.358	6.96806	165.478	4.56974	0.00025693	0.00589865	101102445	exon_intron
Circ_000018	0	0	0	0	96.2146	133.731	191.024	149.721	0.001	142.673	17.1223	2.61811e-06	0.000138126	101101945	intronic
Circ_000036	58.7429	45.4866	101.148	55.7445	0	13.3731	0	0	65.2805	3.34327	-4.28732	0.00109011	0.0189433	101108012	annot_exons
Circ_000046	0	0	0	0	82.4697	0	23.878	59.8883	0.001	41.559	15.3429	0.0255696	0.208953	101123420	annot_exons
Circ_000061	39.1619	0	0	139.361	247.409	93.6117	262.658	59.8883	44.6308	165.892	1.89413	0.0479992	0.319604	101103100	annot_exons
Circ_000074	0	0	0	0	247.409	254.089	202.963	14.9721	0.001	179.858	17.4565	8.74313e-06	0.000381215	105616272	exon_intron
Circ_000110	97.9048	0	101.148	0	0	0	0	0	49.7632	0.001	-15.6028	0.0372427	0.271089	101105449	annot_exons
Circ_000133	0	0	0	0	13.7449	80.2386	35.817	29.9442	0.001	39.9362	15.2854	0.0210561	0.181694	101108698	one_exon
Circ_000138	587.429	545.839	581.601	780.423	0	0	0	14.9721	623.823	3.74302	-7.38079	7.48605e-21	6.37015e-18	101115501	annot_exons
Circ_000142	0	0	0	0	68.7247	53.4924	47.7561	59.8883	0.001	57.4654	15.8104	0.00147527	0.024262	101115501	annot_exons
Circ_000145	19.581	136.46	25.287	0	0	0	0	0	45.3319	0.001	-15.4682	0.035638	0.26245	101115501	annot_exons
Circ_000146	58.7429	136.46	25.287	0	13.7449	0	0	0	55.1224	3.43624	-4.00374	0.0480416	0.31978	101115501	annot_exons
Circ_000147	2897.98	2251.59	1694.23	1198.51	673.502	601.789	620.829	434.19	2010.58	582.578	-1.78709	4.44026e-06	0.000214131	101115501	annot_exons
Circ_000154	39.1619	0	0	0	82.4697	133.731	167.146	74.8604	9.79048	114.552	3.54848	0.00108416	0.0188647	101109922	annot_exons
Circ_000157	0	22.7433	0	250.85	0	0	0	0	68.3983	0.001	-16.0617	0.0325478	0.246576	101110630	annot_exons
Circ_000160	58.7429	181.946	50.574	0	0	0	0	0	72.8158	0.001	-16.152	0.00412708	0.0545384	101116530	annot_exons
Circ_000165	58.7429	0	75.861	167.233	13.7449	26.7462	0	0	75.4593	10.1228	-2.89809	0.0311065	0.23923	101111326	annot_exons
Circ_000174	548.267	432.123	556.314	445.956	41.2348	26.7462	47.7561	59.8883	495.665	43.9064	-3.49686	3.48606e-13	8.21061e-11	101117555	antisense
Circ_000206	78.3239	500.353	404.592	55.7445	54.9798	53.4924	23.878	29.9442	259.753	40.5736	-2.67853	0.00278921	0.0402498	101121469	annot_exons
Circ_000218	0	0	0	0	41.2348	0	59.6951	29.9442	0.001	32.7185	14.9978	0.0426667	0.295874	101122655	antisense
Circ_000222	58.7429	45.4866	50.574	0	494.818	1029.73	620.829	404.246	38.7009	637.405	4.04177	1.71199e-09	2.1608e-07	101103519	annot_exons
Circ_000229	0	0	0	0	27.4899	26.7462	47.7561	14.9721	0.001	29.2411	14.8357	0.0409758	0.288404	101103519	annot_exons
Circ_000240	0	0	0	0	41.2348	26.7462	0	89.8325	0.001	39.4534	15.2679	0.0352603	0.260429	101101858	annot_exons
Circ_000245	78.3239	45.4866	126.435	55.7445	41.2348	13.3731	0	0	76.4975	13.652	-2.4863	0.0245958	0.202881	101104696	annot_exons
Circ_000246	117.486	136.46	25.287	0	0	13.3731	0	14.9721	69.8081	7.08629	-3.30029	0.0168887	0.156171	101104696	annot_exons
Circ_000253	254.553	113.716	354.018	83.6167	109.96	93.6117	71.6341	14.9721	201.476	72.5444	-1.47367	0.0397434	0.283426	101104696	annot_exons
Circ_000255	0	0	0	0	41.2348	26.7462	71.6341	44.9162	0.001	46.1328	15.4935	0.00574442	0.0706443	101105195	annot_exons
Circ_000261	0	0	0	0	13.7449	80.2386	11.939	164.693	0.001	67.6538	16.0459	0.00566528	0.0698338	106990833	annot_exons
Circ_000272	0	22.7433	0	0	68.7247	53.4924	47.7561	44.9162	5.68582	53.7224	3.24008	0.038403	0.277017	101105862	annot_exons
Circ_000278	0	0	0	0	41.2348	53.4924	107.451	0	0.001	50.5446	15.6253	0.0113846	0.117493	101111588	annot_exons
Circ_000286	78.3239	113.716	126.435	83.6167	13.7449	13.3731	0	0	100.523	6.77951	-3.8902	0.000180398	0.00445157	101116000	annot_exons
Circ_000289	58.7429	295.663	252.87	111.489	0	40.1193	23.878	14.9721	179.691	19.7423	-3.18615	0.000382663	0.00816688	101116000	annot_exons
Circ_000300	117.486	45.4866	50.574	83.6167	0	13.3731	35.817	29.9442	74.2908	19.7836	-1.90888	0.0420599	0.293053	101110809	one_exon
Circ_000327	0	0	0	0	27.4899	26.7462	47.7561	44.9162	0.001	36.7271	15.1646	0.0214949	0.184695	101123247	exon_intron
Circ_000330	0	0	0	0	13.7449	93.6117	23.878	29.9442	0.001	40.2947	15.2983	0.0257892	0.209838	101103101	intronic
Circ_000331	0	0	0	0	13.7449	80.2386	47.7561	29.9442	0.001	42.9209	15.3894	0.0136106	0.134512	101103101	intronic
Circ_000335	0	0	0	0	0	53.4924	35.817	59.8883	0.001	37.2994	15.1869	0.0281161	0.223175	101103101	intronic
Circ_000343	0	0	0	0	13.7449	26.7462	35.817	134.749	0.001	52.7642	15.6873	0.010544	0.111034	101106636	annot_exons
Circ_000349	0	0	0	0	82.4697	13.3731	11.939	29.9442	0.001	34.4315	15.0714	0.0429755	0.29739	101107397	annot_exons
Circ_000352	0	0	0	0	27.4899	13.3731	35.817	74.8604	0.001	37.8851	15.2093	0.0210013	0.181673	101107397	annot_exons
Circ_000358	0	0	0	0	96.2146	160.477	155.207	134.749	0.001	136.662	17.0603	2.71116e-06	0.000141636	101115174	exon_intron
Circ_000375	0	0	0	0	27.4899	53.4924	59.6951	59.8883	0.001	50.1414	15.6137	0.00320582	0.0448866	101110462	annot_exons
Circ_000393	137.067	0	202.296	55.7445	0	53.4924	23.878	0	98.7768	19.3426	-2.35239	0.0494125	0.326595	101114400	annot_exons
Circ_000406	274.134	90.9732	50.574	27.8722	0	26.7462	0	44.9162	110.888	17.9156	-2.62982	0.0184419	0.165751	101115584	annot_exons
Circ_000408	39.1619	45.4866	25.287	111.489	0	0	0	0	55.3561	0.001	-15.7565	0.00527254	0.0658855	101115584	annot_exons
Circ_000409	234.972	0	50.574	55.7445	0	13.3731	0	0	85.3225	3.34327	-4.67359	0.0096834	0.104602	101115584	annot_exons
Circ_000424	176.229	0	50.574	111.489	0	13.3731	0	29.9442	84.5729	10.8293	-2.96525	0.0168576	0.156031	101117285	annot_exons
Circ_000428	0	0	0	0	27.4899	53.4924	59.6951	29.9442	0.001	42.6554	15.3804	0.00916037	0.10054	101118317	annot_exons
Circ_000444	0	0	0	0	82.4697	13.3731	59.6951	134.749	0.001	72.5716	16.1471	0.000949552	0.0168902	101122145	antisense
Circ_000458	450.362	454.866	328.731	278.722	0	133.731	23.878	0	378.17	39.4022	-3.26269	6.0231e-05	0.00183468	100127210	annot_exons
Circ_000461	0	0	0	0	82.4697	40.1193	107.451	14.9721	0.001	61.253	15.9025	0.00272155	0.0395609	101120795	annot_exons
Circ_000462	0	0	0	0	82.4697	40.1193	47.7561	104.805	0.001	68.7874	16.0699	0.000533128	0.0106219	101120795	annot_exons
Circ_000464	0	0	0	0	233.664	240.716	47.7561	254.525	0.001	194.165	17.5669	4.08799e-06	0.000199329	101120795	one_exon
Circ_000466	0	0	0	0	27.4899	106.985	11.939	29.9442	0.001	44.0895	15.4281	0.0197019	0.174021	101102768	annot_exons
Circ_000472	78.3239	181.946	177.009	0	0	0	47.7561	14.9721	109.32	15.682	-2.80137	0.0167379	0.155468	101103022	annot_exons
Circ_000489	19.581	45.4866	25.287	139.361	0	0	0	0	57.4289	0.001	-15.8095	0.00868179	0.0966163	101104698	annot_exons
Circ_000495	19.581	0	151.722	83.6167	0	0	11.939	0	63.7299	2.98475	-4.41629	0.0119629	0.122361	101121820	annot_exons
Circ_000507	0	136.46	354.018	83.6167	0	0	0	0	143.524	0.001	-17.1309	0.000348725	0.00758369	101106044	annot_exons
Circ_000508	97.9048	0	75.861	55.7445	0	0	0	0	57.3776	0.001	-15.8082	0.0100738	0.107398	101106044	annot_exons
Circ_000515	97.9048	45.4866	0	222.978	0	0	11.939	29.9442	91.5923	10.4708	-3.12886	0.0169802	0.156671	101123342	annot_exons
Circ_000516	78.3239	45.4866	50.574	55.7445	0	0	23.878	14.9721	57.5322	9.71253	-2.56645	0.0367005	0.268327	101123342	annot_exons
Circ_000521	0	68.2299	101.148	83.6167	0	13.3731	11.939	14.9721	63.2487	10.071	-2.65082	0.0489531	0.324447	101123342	annot_exons
Circ_000523	176.229	318.406	252.87	83.6167	0	0	0	29.9442	207.78	7.48604	-4.79471	1.03225e-06	6.29864e-05	101123342	annot_exons
Circ_000525	744.077	250.176	455.166	306.595	27.4899	26.7462	11.939	119.777	439.003	46.4879	-3.2393	1.1379e-05	0.000475701	101123342	annot_exons
Circ_000526	0	90.9732	50.574	27.8722	0	0	0	0	42.3549	0.001	-15.3702	0.0355464	0.261921	101108002	annot_exons
Circ_000527	117.486	22.7433	25.287	27.8722	0	0	0	0	48.3471	0.001	-15.5611	0.0119729	0.122416	101108002	annot_exons
Circ_000533	0	0	0	0	41.2348	40.1193	35.817	59.8883	0.001	44.2649	15.4339	0.00763133	0.087907	101108702	annot_exons
Circ_000541	39.1619	0	25.287	139.361	0	0	0	0	50.9525	0.001	-15.6369	0.0245116	0.202313	101109659	annot_exons
Circ_000543	0	0	0	0	68.7247	0	71.6341	14.9721	0.001	38.8327	15.245	0.038959	0.279266	101109925	annot_exons
Circ_000548	39.1619	0	126.435	111.489	0	0	0	0	69.2715	0.001	-16.08	0.00535521	0.0667289	101110191	annot_exons
Circ_000559	58.7429	68.2299	101.148	111.489	13.7449	0	0	0	84.9024	3.43624	-4.6269	0.000121477	0.00325985	101110191	annot_exons
Circ_000560	117.486	432.123	531.027	334.467	164.939	106.985	191.024	74.8604	353.776	134.452	-1.39574	0.0173989	0.159197	101110191	annot_exons
Circ_000563	39.1619	0	75.861	139.361	0	0	0	0	63.596	0.001	-15.9566	0.0097606	0.105264	101110463	annot_exons
Circ_000564	39.1619	136.46	0	27.8722	0	0	0	0	50.8735	0.001	-15.6346	0.0221417	0.188506	101110463	annot_exons
Circ_000565	39.1619	22.7433	50.574	111.489	0	0	0	14.9721	55.992	3.74302	-3.90295	0.0229891	0.193438	101110463	annot_exons
Circ_000566	156.648	181.946	303.444	111.489	13.7449	13.3731	35.817	29.9442	188.382	23.2198	-3.02023	2.41138e-05	0.000864263	101110463	annot_exons
Circ_000568	528.686	250.176	354.018	390.211	27.4899	0	35.817	44.9162	380.773	27.0558	-3.81492	2.00378e-09	2.51704e-07	101110463	annot_exons
Circ_000569	411.2	181.946	177.009	139.361	13.7449	13.3731	11.939	29.9442	227.379	17.2503	-3.72041	2.29649e-06	0.000124621	101110463	annot_exons
Circ_000570	39.1619	181.946	0	55.7445	13.7449	13.3731	0	0	69.2132	6.77951	-3.35179	0.0194185	0.17266	101110463	annot_exons
Circ_000582	117.486	113.716	126.435	27.8722	0	13.3731	0	0	96.3774	3.34327	-4.84936	7.19435e-05	0.00209239	443264	annot_exons
Circ_000583	97.9048	90.9732	50.574	0	27.4899	0	0	0	59.863	6.87247	-3.12276	0.0280014	0.222485	443264	annot_exons
Circ_000594	0	0	0	0	68.7247	13.3731	47.7561	14.9721	0.001	36.2065	15.144	0.0340443	0.254479	101113544	annot_exons
Circ_000596	215.391	45.4866	101.148	111.489	27.4899	13.3731	0	14.9721	118.379	13.9588	-3.08416	0.00147927	0.0243125	101113806	annot_exons
Circ_000600	39.1619	68.2299	0	111.489	0	0	0	0	54.7202	0.001	-15.7398	0.0120154	0.12266	100820736	annot_exons
Circ_000606	0	0	0	0	54.9798	160.477	214.902	59.8883	0.001	122.562	16.9032	2.09975e-05	0.000775762	101116520	annot_exons
Circ_000608	0	0	0	0	137.449	26.7462	0	44.9162	0.001	52.278	15.6739	0.0166098	0.1545	101116779	one_exon
Circ_000611	0	0	0	0	178.684	40.1193	95.5121	164.693	0.001	119.752	16.8697	0.000131504	0.00346548	101117459	annot_exons
Circ_000612	0	0	0	0	82.4697	187.223	83.5731	209.609	0.001	140.719	17.1025	1.71047e-05	0.000655822	101117459	annot_exons
Circ_000613	0	0	25.287	0	68.7247	106.985	23.878	29.9442	6.32175	57.3829	3.18223	0.0446821	0.304639	101117459	annot_exons
Circ_000621	97.9048	113.716	404.592	390.211	27.4899	26.7462	95.5121	44.9162	251.606	48.6661	-2.37018	0.00186976	0.029355	101117711	annot_exons
Circ_000627	78.3239	159.203	101.148	250.85	398.604	548.297	585.012	823.464	147.381	588.844	1.99833	8.31898e-05	0.00235205	101117976	annot_exons
Circ_000632	58.7429	113.716	177.009	27.8722	27.4899	26.7462	23.878	0	94.3352	19.5285	-2.27221	0.019869	0.174476	101118233	annot_exons
Circ_000641	215.391	750.529	126.435	250.85	0	40.1193	0	44.9162	335.801	21.2589	-3.98147	1.63722e-05	0.00063512	101119772	annot_exons
Circ_000658	117.486	0	101.148	0	0	0	0	0	54.6585	0.001	-15.7382	0.0287249	0.226122	101120967	annot_exons
Circ_000681	78.3239	22.7433	50.574	55.7445	0	0	0	0	51.8464	0.001	-15.662	0.00598585	0.0727318	101122232	annot_exons
Circ_000688	58.7429	136.46	126.435	195.106	0	26.7462	11.939	0	129.186	9.6713	-3.73959	0.000232725	0.00546665	101122232	annot_exons
Circ_000692	39.1619	45.4866	0	111.489	0	0	0	0	49.0344	0.001	-15.5815	0.023812	0.197901	101109140	annot_exons
Circ_000693	548.267	682.299	480.453	696.806	27.4899	53.4924	11.939	14.9721	601.956	26.9733	-4.48005	2.66473e-16	1.08143e-13	101109140	annot_exons
Circ_000694	58.7429	68.2299	177.009	111.489	13.7449	0	0	0	103.868	3.43624	-4.91777	4.50681e-05	0.0014641	101109140	annot_exons
Circ_000695	39.1619	113.716	101.148	55.7445	27.4899	13.3731	0	14.9721	77.4427	13.9588	-2.47196	0.0145479	0.141192	101123163	annot_exons
Circ_000701	58.7429	159.203	151.722	27.8722	0	40.1193	23.878	0	99.3851	15.9993	-2.63502	0.0079831	0.0911622	101110473	annot_exons
Circ_000705	19.581	22.7433	75.861	222.978	0	0	23.878	0	85.2908	5.96951	-3.83671	0.00841783	0.0946118	101104103	annot_exons
Circ_000728	0	0	0	0	206.174	227.343	107.451	299.442	0.001	210.102	17.6807	1.00205e-07	8.03434e-06	101111511	annot_exons
Circ_000733	19.581	45.4866	0	0	41.2348	80.2386	35.817	209.609	16.2669	91.7249	2.49537	0.030053	0.23358	101111511	annot_exons
Circ_000739	0	0	0	0	27.4899	66.8655	11.939	59.8883	0.001	41.5457	15.3424	0.0144183	0.140296	101111511	annot_exons
Circ_000743	0	0	0	0	82.4697	66.8655	59.6951	164.693	0.001	93.4308	16.5116	6.92163e-05	0.00203099	101111511	annot_exons
Circ_000746	58.7429	0	25.287	83.6167	82.4697	481.431	465.622	239.553	41.9117	317.269	2.92028	0.0005213	0.0104573	101111138	one_exon
Circ_000752	0	0	0	0	137.449	227.343	167.146	224.581	0.001	189.13	17.529	4.24026e-08	3.80455e-06	101112532	annot_exons
Circ_000756	0	0	0	0	68.7247	106.985	11.939	14.9721	0.001	50.6552	15.6284	0.0108639	0.113721	101114569	annot_exons
Circ_000769	0	0	0	0	13.7449	80.2386	47.7561	14.9721	0.001	39.1779	15.2578	0.0251101	0.20622	101117803	exon_intron
Circ_000793	0	0	531.027	0	0	0	0	0	132.757	0.001	-17.0184	0.0124896	0.126522	101119773	antisense
Circ_000797	0	0	0	0	27.4899	106.985	59.6951	104.805	0.001	74.7436	16.1897	0.000418548	0.00876957	101121383	annot_exons
Circ_000802	19.581	68.2299	25.287	55.7445	0	0	0	0	42.2106	0.001	-15.3653	0.0168174	0.155822	101121894	annot_exons
Circ_000810	78.3239	0	101.148	27.8722	0	0	0	0	51.836	0.001	-15.6617	0.0181032	0.163542	101123510	annot_exons
Circ_000811	58.7429	136.46	75.861	222.978	0	13.3731	0	0	123.51	3.34327	-5.20723	1.91313e-05	0.000715598	101123510	annot_exons
Circ_000813	117.486	22.7433	25.287	111.489	0	0	0	0	69.2513	0.001	-16.0796	0.00231133	0.0346424	101123510	annot_exons
Circ_000817	195.81	90.9732	50.574	139.361	0	0	0	0	119.18	0.001	-16.8628	1.44874e-05	0.000580264	101123510	annot_exons
Circ_000818	58.7429	204.69	227.583	195.106	0	0	0	14.9721	171.53	3.74302	-5.51812	7.0953e-07	4.55394e-05	101123510	annot_exons
Circ_000819	0	22.7433	151.722	111.489	0	0	0	0	71.4886	0.001	-16.1254	0.00793254	0.090664	101123510	annot_exons
Circ_000821	0	90.9732	177.009	27.8722	27.4899	0	0	0	73.9636	6.87247	-3.42791	0.0219477	0.18743	101102437	annot_exons
Circ_000828	0	0	0	0	27.4899	66.8655	23.878	44.9162	0.001	40.7874	15.3158	0.0158985	0.149805	101116113	one_exon
Circ_000830	58.7429	136.46	75.861	222.978	0	53.4924	0	0	123.51	13.3731	-3.20723	0.00394711	0.0527461	101102944	annot_exons
Circ_000831	58.7429	136.46	126.435	27.8722	0	0	0	0	87.3775	0.001	-16.415	0.000252039	0.00580658	101102944	annot_exons
Circ_000841	352.457	409.379	202.296	195.106	54.9798	40.1193	47.7561	29.9442	289.81	43.1998	-2.74601	5.95778e-06	0.000274276	101117131	annot_exons
Circ_000859	58.7429	68.2299	278.157	306.595	41.2348	0	11.939	44.9162	177.931	24.5225	-2.85914	0.00245331	0.0363368	101117639	one_exon
Circ_000866	0	0	0	0	13.7449	26.7462	119.39	14.9721	0.001	43.7133	15.4158	0.0247086	0.20362	101107561	annot_exons
Circ_000872	19.581	90.9732	50.574	0	0	0	0	0	40.282	0.001	-15.2978	0.0368642	0.269151	101107830	annot_exons
Circ_000874	195.81	250.176	177.009	55.7445	0	13.3731	11.939	14.9721	169.685	10.071	-4.07457	1.89693e-05	0.000710785	101107830	annot_exons
Circ_000902	156.648	45.4866	278.157	111.489	13.7449	0	23.878	14.9721	147.945	13.1488	-3.49206	0.000164479	0.00415992	101111921	annot_exons
Circ_000904	58.7429	113.716	177.009	55.7445	13.7449	40.1193	23.878	0	101.303	19.4356	-2.38191	0.00921574	0.100914	101112360	annot_exons
Circ_000914	0	0	0	0	27.4899	0	59.6951	44.9162	0.001	33.0253	15.0113	0.0431429	0.297611	101121483	annot_exons
Circ_000916	19.581	0	0	0	13.7449	147.104	83.5731	14.9721	4.89524	64.8485	3.72762	0.0173085	0.158755	101121483	annot_exons
Circ_000918	137.067	204.69	480.453	139.361	0	0	0	0	240.393	0.001	-17.875	7.96427e-08	6.57953e-06	101113636	antisense
Circ_000919	176.229	181.946	50.574	27.8722	0	26.7462	71.6341	0	109.155	24.5951	-2.14994	0.0369124	0.269308	100302550	annot_exons
Circ_000920	0	0	0	0	13.7449	40.1193	23.878	44.9162	0.001	30.6646	14.9043	0.0413821	0.290553	100302550	antisense
Circ_000926	0	0	0	0	137.449	213.97	95.5121	14.9721	0.001	115.476	16.8172	8.51996e-05	0.00239859	101117548	annot_exons
Circ_000928	19.581	113.716	0	0	164.939	200.596	191.024	299.442	33.3244	214	2.68296	0.00106119	0.0185507	101117548	annot_exons
Circ_000936	117.486	45.4866	0	83.6167	13.7449	0	0	0	61.6473	3.43624	-4.16514	0.0281623	0.223426	101120709	annot_exons
Circ_000965	156.648	0	177.009	195.106	0	0	35.817	0	132.191	8.95426	-3.8839	0.00388701	0.0522075	101121642	annot_exons
Circ_000971	156.648	90.9732	252.87	27.8722	0	0	0	0	132.091	0.001	-17.0112	2.91334e-05	0.00100722	101122644	annot_exons
Circ_000980	0	22.7433	0	0	96.2146	200.596	83.5731	89.8325	5.68582	117.554	4.36981	0.000254239	0.00584705	101103105	annot_exons
Circ_000986	0	0	0	0	1814.33	1350.68	2363.93	1242.68	0.001	1692.91	20.6911	4.25982e-25	5.35094e-22	101103105	annot_exons
Circ_000998	39.1619	45.4866	0	0	109.96	173.85	47.7561	29.9442	21.1621	90.3775	2.09448	0.0443437	0.302885	101104538	annot_exons
Circ_001003	39.1619	45.4866	25.287	111.489	0	0	0	0	55.3561	0.001	-15.7565	0.00526851	0.0658664	101108092	exon_intron
Circ_001020	0	0	0	0	27.4899	26.7462	226.841	0	0.001	70.2693	16.1006	0.00949835	0.103496	NA	intergenic
Circ_001021	0	0	0	0	123.705	53.4924	71.6341	29.9442	0.001	69.6938	16.0887	0.000732589	0.0136669	NA	intergenic
Circ_001023	1057.37	1501.06	1795.38	780.423	151.194	66.8655	71.6341	119.777	1283.56	102.368	-3.64832	5.9427e-13	1.37511e-10	101112775	annot_exons
Circ_001027	0	0	0	0	27.4899	106.985	11.939	14.9721	0.001	40.3464	15.3002	0.0341499	0.255123	104564309	annot_exons
Circ_001035	0	68.2299	50.574	55.7445	0	0	0	0	43.6371	0.001	-15.4133	0.0293346	0.229223	101117032	annot_exons
Circ_001038	156.648	386.636	151.722	250.85	41.2348	40.1193	47.7561	14.9721	236.464	36.0206	-2.71473	4.68702e-05	0.00152077	101117032	annot_exons
Circ_001040	39.1619	204.69	303.444	195.106	13.7449	66.8655	47.7561	59.8883	185.6	47.0637	-1.97951	0.0106833	0.112187	101117032	annot_exons
Circ_001054	97.9048	45.4866	50.574	27.8722	137.449	147.104	143.268	194.637	55.4594	155.615	1.48847	0.0268105	0.215292	443456	annot_exons
Circ_001078	19.581	0	0	0	13.7449	13.3731	83.5731	89.8325	4.89524	50.1309	3.35625	0.0473779	0.317365	101119595	exon_intron
Circ_001088	0	0	0	0	82.4697	120.358	11.939	14.9721	0.001	57.4347	15.8096	0.00818713	0.0927301	101121386	exon_intron
Circ_001125	0	0	0	0	68.7247	53.4924	59.6951	44.9162	0.001	56.7071	15.7912	0.00151157	0.0247356	101108177	annot_exons
Circ_001127	0	0	0	0	41.2348	120.358	95.5121	29.9442	0.001	71.7622	16.1309	0.000572131	0.0112714	101108177	annot_exons
Circ_001144	0	0	0	0	164.939	200.596	59.6951	44.9162	0.001	117.537	16.8428	3.32273e-05	0.00113217	101109497	annot_exons
Circ_001182	0	0	0	0	54.9798	53.4924	0	44.9162	0.001	38.3471	15.2268	0.0267695	0.21516	101112695	exon_intron
Circ_001194	0	0	0	0	467.328	361.074	549.195	838.436	0.001	554.008	19.0795	2.38099e-14	7.21932e-12	101112943	annot_exons
Circ_001196	0	0	0	0	54.9798	80.2386	59.6951	149.721	0.001	86.1586	16.3947	9.90097e-05	0.00272628	101112943	exon_intron
Circ_001197	0	0	0	0	41.2348	26.7462	23.878	59.8883	0.001	37.9368	15.2113	0.0154077	0.146355	101112943	exon_intron
Circ_001200	19.581	0	0	0	109.96	0	47.7561	104.805	4.89524	65.63	3.7449	0.0150073	0.143851	101112943	exon_intron
Circ_001202	0	0	0	0	13.7449	53.4924	23.878	119.777	0.001	52.723	15.6861	0.00898161	0.0990907	101112943	exon_intron
Circ_001206	0	0	0	0	343.624	414.566	382.048	673.743	0.001	453.495	18.7907	1.28302e-13	3.28591e-11	101112943	exon_intron
Circ_001207	19.581	0	0	0	288.644	213.97	441.744	988.157	4.89524	483.129	6.62488	1.10375e-08	1.11984e-06	101112943	exon_intron
Circ_001212	0	0	25.287	27.8722	54.9798	80.2386	71.6341	119.777	13.2898	81.6573	2.61926	0.0158712	0.149805	101114572	antisense
Circ_001251	137.067	0	25.287	27.8722	0	0	0	0	47.5565	0.001	-15.5374	0.0262709	0.212707	101102602	annot_exons
Circ_001253	234.972	159.203	227.583	334.467	13.7449	0	23.878	0	239.056	9.40574	-4.66766	7.62552e-09	8.27792e-07	101117043	annot_exons
Circ_001254	293.715	318.406	429.879	585.317	0	40.1193	11.939	89.8325	406.829	35.4727	-3.51964	2.77541e-07	1.9628e-05	101117043	annot_exons
Circ_001262	0	0	25.287	0	123.705	66.8655	0	104.805	6.32175	73.8436	3.54608	0.0213767	0.183799	101107318	annot_exons
Circ_001271	0	0	0	0	192.429	240.716	226.841	284.469	0.001	236.114	17.8491	5.93158e-10	8.6447e-08	101110552	antisense
Circ_001273	97.9048	68.2299	151.722	55.7445	0	0	11.939	0	93.4003	2.98475	-4.96774	7.04084e-05	0.00205909	101113547	intronic
Circ_001287	0	0	0	0	82.4697	13.3731	35.817	59.8883	0.001	47.887	15.5473	0.00865484	0.096413	101117550	annot_exons
Circ_001289	0	0	0	0	41.2348	66.8655	11.939	44.9162	0.001	41.2389	15.3317	0.0185531	0.16658	101118328	one_exon
Circ_001290	293.715	68.2299	75.861	27.8722	0	66.8655	35.817	0	116.419	25.6706	-2.18114	0.0341785	0.255147	101118328	annot_exons
Circ_001311	0	0	0	0	41.2348	80.2386	71.6341	44.9162	0.001	59.5059	15.8607	0.00113358	0.0196083	101102613	exon_intron
Circ_001318	0	0	0	0	27.4899	120.358	47.7561	0	0.001	48.901	15.5776	0.0198234	0.17432	101102613	annot_exons
Circ_001325	0	0	0	0	68.7247	13.3731	0	74.8604	0.001	39.2396	15.26	0.0412619	0.290098	101102613	annot_exons
Circ_001333	0	0	0	0	68.7247	80.2386	23.878	0	0.001	43.2103	15.3991	0.0246395	0.203177	101102613	exon_intron
Circ_001334	0	0	0	0	109.96	147.104	238.78	134.749	0.001	157.648	17.2663	1.14566e-06	6.88414e-05	101102613	annot_exons
Circ_001336	0	0	0	0	0	66.8655	47.7561	29.9442	0.001	36.1414	15.1414	0.0417166	0.291817	101102613	annot_exons
Circ_001356	0	0	0	0	123.705	133.731	107.451	59.8883	0.001	106.194	16.6963	6.16019e-05	0.00186781	101106133	antisense
Circ_001361	0	0	0	0	68.7247	0	107.451	119.777	0.001	73.9881	16.175	0.00162367	0.0261482	101119775	annot_exons
Circ_001378	0	0	25.287	195.106	0	0	0	0	55.0982	0.001	-15.7497	0.0489632	0.324447	101119775	annot_exons
Circ_001379	58.7429	159.203	50.574	111.489	0	0	11.939	29.9442	95.0022	10.4708	-3.18159	0.00274638	0.0398058	101119775	one_exon
Circ_001416	391.619	0	0	0	0	0	0	0	97.9048	0.001	-16.5791	0.0164778	0.153647	101112936	antisense
Circ_001417	0	0	0	0	82.4697	254.089	107.451	194.637	0.001	159.662	17.2847	5.0704e-06	0.000239699	101118148	exon_intron
Circ_001418	0	0	0	0	13.7449	0	47.7561	104.805	0.001	41.5764	15.3435	0.0440158	0.301505	101118398	exon_intron
Circ_001423	117.486	45.4866	75.861	139.361	13.7449	40.1193	35.817	0	94.5486	22.4203	-2.07625	0.0263697	0.213115	101118912	antisense
Circ_001433	313.295	250.176	202.296	195.106	96.2146	120.358	59.6951	44.9162	240.218	80.296	-1.58095	0.00212472	0.03257	541606	annot_exons
Circ_001452	0	22.7433	0	0	151.194	147.104	71.6341	59.8883	5.68582	107.455	4.24022	0.000508568	0.0102644	NA	intergenic
Circ_001454	0	0	0	0	54.9798	66.8655	59.6951	74.8604	0.001	64.1002	15.968	0.000514055	0.0103513	101110805	annot_exons
Circ_001461	58.7429	181.946	75.861	222.978	68.7247	13.3731	23.878	44.9162	134.882	37.723	-1.83818	0.0225453	0.19047	101109411	annot_exons
Circ_001464	0	0	0	0	13.7449	26.7462	83.5731	14.9721	0.001	34.7591	15.0851	0.0404432	0.286711	101113550	annot_exons
Circ_001479	0	0	0	0	54.9798	66.8655	47.7561	29.9442	0.001	49.8864	15.6064	0.00316127	0.0444705	101111248	annot_exons
Circ_001480	58.7429	0	0	0	274.899	173.85	143.268	74.8604	14.6857	166.719	3.50494	0.000514697	0.0103516	101111248	annot_exons
Circ_001487	19.581	0	0	0	54.9798	26.7462	214.902	29.9442	4.89524	81.6431	4.05988	0.00550583	0.0681549	101111248	annot_exons
Circ_001489	0	0	0	0	27.4899	13.3731	238.78	44.9162	0.001	81.1399	16.3081	0.00239898	0.0356724	101111248	annot_exons
Circ_001501	0	90.9732	0	55.7445	137.449	213.97	238.78	104.805	36.6794	173.751	2.24398	0.00660048	0.0785981	101116363	annot_exons
Circ_001510	0	0	25.287	83.6167	151.194	254.089	47.7561	74.8604	27.2259	131.975	2.27721	0.0197984	0.17428	101116363	annot_exons
Circ_001511	0	0	0	0	96.2146	0	71.6341	74.8604	0.001	60.6773	15.8889	0.00429937	0.0562676	101116363	annot_exons
Circ_001513	0	0	0	0	27.4899	66.8655	23.878	59.8883	0.001	44.5304	15.4425	0.0102912	0.109113	101116363	annot_exons
Circ_001517	58.7429	22.7433	75.861	0	109.96	173.85	131.329	149.721	39.3368	141.215	1.84394	0.0146187	0.141743	101116363	annot_exons
Circ_001521	0	0	0	0	123.705	160.477	59.6951	59.8883	0.001	100.941	16.6232	0.000265699	0.00605781	101111513	annot_exons
Circ_001523	0	0	0	0	27.4899	40.1193	35.817	14.9721	0.001	29.5996	14.8533	0.0385855	0.27801	101111513	annot_exons
Circ_001542	19.581	22.7433	50.574	55.7445	164.939	200.596	202.963	149.721	37.1607	179.555	2.27258	0.00074935	0.0139009	101121731	annot_exons
Circ_001545	0	0	0	0	41.2348	40.1193	0	59.8883	0.001	35.3106	15.1078	0.0397721	0.283508	101122237	annot_exons
Circ_001553	0	0	0	0	68.7247	13.3731	35.817	74.8604	0.001	48.1938	15.5566	0.00840426	0.0945802	101101853	exon_intron
Circ_001555	117.486	90.9732	75.861	83.6167	329.879	334.327	286.536	164.693	91.9842	278.859	1.60008	0.00183104	0.0288365	101101853	annot_exons
Circ_001576	0	0	0	0	27.4899	80.2386	71.6341	164.693	0.001	86.0139	16.3923	0.000221503	0.00526873	NA	intergenic
Circ_001580	19.581	0	25.287	0	68.7247	106.985	95.5121	239.553	11.217	127.694	3.50893	0.000742581	0.013785	101114330	annot_exons
Circ_001590	0	0	0	0	137.449	40.1193	59.6951	59.8883	0.001	74.288	16.1808	0.000422992	0.00883459	101103280	one_exon
Circ_001593	0	0	0	0	41.2348	53.4924	35.817	29.9442	0.001	40.1221	15.2921	0.0129525	0.130062	101103280	annot_exons
Circ_001599	0	45.4866	25.287	55.7445	109.96	147.104	59.6951	104.805	31.6295	105.391	1.73641	0.0422991	0.294083	101103280	annot_exons
Circ_001604	117.486	0	50.574	27.8722	0	0	0	0	48.983	0.001	-15.58	0.0203858	0.177712	101107319	intronic
Circ_001607	137.067	0	50.574	27.8722	0	0	0	0	53.8783	0.001	-15.7174	0.015883	0.149805	101117134	exon_intron
Circ_001620	156.648	45.4866	75.861	111.489	0	13.3731	0	0	97.3711	3.34327	-4.86416	6.25768e-05	0.00188653	101110635	annot_exons
Circ_001632	19.581	113.716	50.574	0	0	0	0	0	45.9679	0.001	-15.4883	0.0286106	0.225748	101111593	annot_exons
Circ_001636	234.972	204.69	202.296	390.211	137.449	93.6117	119.39	164.693	258.042	128.786	-1.00263	0.0419754	0.292541	101118411	annot_exons
Circ_001638	2036.42	3184.06	1947.1	1839.57	357.369	1043.1	990.938	1122.91	2251.79	878.579	-1.35783	0.00209012	0.0321676	101118411	annot_exons
Circ_001654	117.486	90.9732	227.583	111.489	0	0	0	14.9721	136.883	3.74302	-5.19259	2.41097e-06	0.00012953	NA	intergenic
Circ_001659	0	68.2299	50.574	55.7445	0	0	0	0	43.6371	0.001	-15.4133	0.0293252	0.229223	101116878	annot_exons
Circ_001670	0	0	0	0	0	40.1193	23.878	74.8604	0.001	34.7144	15.0832	0.0478317	0.319189	101116878	annot_exons
Circ_001678	0	0	50.574	55.7445	54.9798	187.223	119.39	149.721	26.5796	127.829	2.26582	0.00875762	0.097237	101116878	annot_exons
Circ_001686	0	0	0	0	54.9798	53.4924	71.6341	0	0.001	45.0266	15.4585	0.0178036	0.16161	NA	intergenic
Circ_001689	0	68.2299	126.435	27.8722	0	0	11.939	0	55.6343	2.98475	-4.22029	0.0136071	0.134512	101122756	annot_exons
Circ_001704	78.3239	0	101.148	55.7445	0	0	0	0	58.8041	0.001	-15.8436	0.00761034	0.0877801	100125614	annot_exons
Circ_001706	39.1619	181.946	0	0	0	0	0	0	55.2771	0.001	-15.7544	0.0343448	0.255878	100125614	annot_exons
Circ_001720	137.067	136.46	278.157	27.8722	13.7449	66.8655	23.878	59.8883	144.889	41.0942	-1.81794	0.0303583	0.235143	101120124	annot_exons
Circ_001732	137.067	250.176	50.574	250.85	0	26.7462	0	0	172.167	6.68655	-4.6864	1.63486e-05	0.00063512	101122744	annot_exons
Circ_001754	19.581	0	0	0	54.9798	53.4924	83.5731	59.8883	4.89524	62.9834	3.68552	0.0114655	0.118157	101103442	annot_exons
Circ_001756	0	0	0	0	233.664	40.1193	35.817	74.8604	0.001	96.1152	16.5525	0.000367975	0.00794988	101103442	annot_exons
Circ_001762	0	0	0	0	54.9798	53.4924	83.5731	89.8325	0.001	70.4694	16.1047	0.000345463	0.00753674	101103688	one_exon
Circ_001763	39.1619	45.4866	0	83.6167	0	0	0	0	42.0663	0.001	-15.3604	0.029869	0.232363	101106812	annot_exons
Circ_001764	58.7429	90.9732	50.574	0	0	0	0	0	50.0725	0.001	-15.6117	0.0138416	0.136191	101106812	annot_exons
Circ_001777	234.972	159.203	126.435	222.978	13.7449	0	0	0	185.897	3.43624	-5.75753	1.63552e-08	1.58035e-06	101109499	annot_exons
Circ_001778	0	136.46	0	195.106	0	13.3731	0	0	82.8914	3.34327	-4.63189	0.0287546	0.226221	101109499	annot_exons
Circ_001780	332.876	136.46	303.444	83.6167	0	0	11.939	29.9442	214.099	10.4708	-4.35384	6.66561e-06	0.000303159	101109499	annot_exons
Circ_001786	0	0	0	0	137.449	133.731	191.024	179.665	0.001	160.467	17.2919	3.17435e-07	2.22702e-05	101109327	annot_exons
Circ_001792	176.229	886.989	126.435	195.106	13.7449	26.7462	0	89.8325	346.189	32.5809	-3.40946	0.000531773	0.010619	101111506	annot_exons
Circ_001808	78.3239	22.7433	0	139.361	0	0	0	0	60.1071	0.001	-15.8752	0.0118509	0.121404	101114151	annot_exons
Circ_001819	19.581	113.716	50.574	55.7445	0	13.3731	0	0	59.904	3.34327	-4.16332	0.00334766	0.0464779	101114404	annot_exons
Circ_001820	19.581	45.4866	75.861	0	0	0	0	0	35.2321	0.001	-15.1046	0.0492733	0.325841	101114404	annot_exons
Circ_001824	117.486	68.2299	25.287	55.7445	0	0	11.939	0	66.6868	2.98475	-4.48172	0.00114496	0.0197276	101114404	annot_exons
Circ_001829	0	181.946	0	55.7445	0	0	0	0	59.4227	0.001	-15.8587	0.02987	0.232363	NA	intergenic
Circ_001835	0	0	0	0	109.96	26.7462	23.878	29.9442	0.001	47.632	15.5396	0.0109076	0.114043	101115417	antisense
Circ_001848	58.7429	45.4866	0	55.7445	0	0	11.939	0	39.9935	2.98475	-3.74408	0.0243897	0.20162	101115924	annot_exons
Circ_001857	0	45.4866	75.861	139.361	0	13.3731	0	14.9721	65.1772	7.08629	-3.20126	0.0215684	0.184965	101116191	annot_exons
Circ_001861	254.553	45.4866	227.583	0	13.7449	26.7462	0	29.9442	131.906	17.6088	-2.90513	0.0162795	0.152337	101112697	annot_exons
Circ_001877	1683.96	705.042	758.61	557.445	68.7247	13.3731	23.878	29.9442	926.265	33.98	-4.76867	1.38905e-11	2.5987e-09	101113983	annot_exons
Circ_001879	156.648	68.2299	25.287	0	0	0	0	0	62.5412	0.001	-15.9325	0.00850848	0.0952653	101113983	annot_exons
Circ_001880	97.9048	136.46	75.861	167.233	13.7449	26.7462	0	14.9721	119.365	13.8658	-3.10577	0.000211146	0.00505888	101113983	annot_exons
Circ_001887	19.581	136.46	101.148	195.106	0	0	23.878	0	113.074	5.96951	-4.24351	0.000693344	0.0130176	101118837	one_exon
Circ_001890	293.715	523.096	354.018	418.084	13.7449	40.1193	23.878	14.9721	397.228	23.1786	-4.0991	3.59157e-11	6.27431e-09	101118837	annot_exons
Circ_001891	97.9048	113.716	25.287	111.489	0	13.3731	0	14.9721	87.0993	7.08629	-3.61956	0.000928174	0.0165771	101118837	annot_exons
Circ_001904	97.9048	113.716	126.435	195.106	0	40.1193	0	0	133.29	10.0298	-3.73221	0.000142443	0.00368382	101120715	annot_exons
Circ_001911	39.1619	159.203	0	0	0	0	0	0	49.5913	0.001	-15.5978	0.0428548	0.296828	101123082	annot_exons
Circ_001951	0	90.9732	25.287	111.489	0	13.3731	0	14.9721	56.9373	7.08629	-3.00627	0.0412241	0.289909	101105202	annot_exons
Circ_001955	0	0	0	0	27.4899	66.8655	23.878	44.9162	0.001	40.7874	15.3158	0.0158985	0.149805	101105708	annot_exons
Circ_001979	78.3239	90.9732	50.574	111.489	0	40.1193	0	0	82.84	10.0298	-3.04603	0.00455305	0.0587597	101109405	annot_exons
Circ_002011	0	0	0	27.8722	27.4899	106.985	155.207	104.805	6.96806	98.6216	3.82308	0.00174512	0.0277818	101115085	annot_exons
Circ_002012	0	0	0	0	41.2348	53.4924	155.207	29.9442	0.001	69.9696	16.0944	0.00132715	0.022242	101115085	annot_exons
Circ_002026	0	113.716	25.287	55.7445	316.134	414.566	262.658	194.637	48.687	296.999	2.60885	0.000172618	0.00430385	101120380	annot_exons
Circ_002027	0	0	0	0	82.4697	147.104	167.146	89.8325	0.001	121.638	16.8922	2.30407e-05	0.000832589	101116109	annot_exons
Circ_002033	0	0	0	0	123.705	66.8655	107.451	0	0.001	74.5053	16.1851	0.00160885	0.0259412	101120630	annot_exons
Circ_002034	0	0	0	0	68.7247	40.1193	155.207	0	0.001	66.0128	16.0105	0.00516136	0.0649888	101120630	annot_exons
Circ_002038	0	0	0	0	96.2146	93.6117	71.6341	14.9721	0.001	69.1081	16.0766	0.000900126	0.0161198	101120630	annot_exons
Circ_002050	0	0	0	83.6167	82.4697	93.6117	71.6341	89.8325	20.9042	84.387	2.01323	0.0495614	0.327418	101120630	annot_exons
Circ_002051	0	0	0	0	151.194	133.731	131.329	134.749	0.001	137.751	17.0717	1.5424e-06	8.84498e-05	101120630	annot_exons
Circ_002052	39.1619	0	50.574	55.7445	137.449	173.85	119.39	179.665	36.3701	152.589	2.06882	0.00315036	0.0444165	101120630	annot_exons
Circ_002057	254.553	159.203	252.87	0	68.7247	80.2386	11.939	29.9442	166.656	47.7116	-1.80446	0.048122	0.320154	101116528	annot_exons
Circ_002069	19.581	181.946	0	27.8722	0	0	0	0	57.3499	0.001	-15.8075	0.0230982	0.193962	101117035	annot_exons
Circ_002082	234.972	227.433	101.148	139.361	0	0	0	104.805	175.728	26.2011	-2.74565	0.00675948	0.0801386	101117464	annot_exons
Circ_002089	58.7429	113.716	101.148	139.361	68.7247	26.7462	23.878	14.9721	103.242	33.5803	-1.62035	0.0388629	0.279032	101117718	annot_exons
Circ_002104	0	0	50.574	55.7445	41.2348	120.358	119.39	89.8325	26.5796	92.7038	1.80231	0.047515	0.317879	101119097	annot_exons
Circ_002106	0	0	0	0	27.4899	53.4924	59.6951	29.9442	0.001	42.6554	15.3804	0.00915638	0.10054	101119355	annot_exons
Circ_002110	313.295	159.203	151.722	418.084	123.705	40.1193	131.329	119.777	260.576	103.732	-1.32884	0.0292258	0.22872	101119355	annot_exons
Circ_002115	0	0	25.287	0	54.9798	26.7462	47.7561	119.777	6.32175	62.3147	3.30118	0.0287176	0.226122	101119355	annot_exons
Circ_002118	234.972	22.7433	25.287	27.8722	0	0	0	44.9162	77.7185	11.2291	-2.79102	0.0407387	0.288186	101119355	annot_exons
Circ_002119	0	0	0	0	123.705	80.2386	167.146	104.805	0.001	118.973	16.8603	1.8835e-05	0.000706754	101119355	annot_exons
Circ_002128	39.1619	0	75.861	167.233	13.7449	13.3731	0	0	70.5641	6.77951	-3.37968	0.01804	0.163195	100885768	annot_exons
Circ_002142	58.7429	113.716	50.574	0	13.7449	0	0	0	55.7583	3.43624	-4.02029	0.0370183	0.269977	101101942	annot_exons
Circ_002145	39.1619	0	25.287	27.8722	68.7247	66.8655	167.146	104.805	23.0803	101.885	2.14221	0.0208493	0.18085	101103028	annot_exons
Circ_002150	0	0	0	0	13.7449	66.8655	23.878	104.805	0.001	52.3232	15.6752	0.00797617	0.0911231	101103028	annot_exons
Circ_002164	0	0	0	0	54.9798	93.6117	11.939	179.665	0.001	85.0489	16.376	0.000810479	0.0148116	101102615	annot_exons
Circ_002186	19.581	68.2299	50.574	55.7445	0	0	0	0	48.5323	0.001	-15.5667	0.00947149	0.103339	101104368	annot_exons
Circ_002195	0	0	0	0	164.939	26.7462	0	104.805	0.001	74.1225	16.1776	0.00377486	0.0509868	NA	intergenic
Circ_002203	39.1619	136.46	25.287	0	0	0	0	0	50.2272	0.001	-15.6162	0.0222069	0.188723	101112781	annot_exons
Circ_002232	19.581	136.46	75.861	362.339	27.4899	40.1193	23.878	29.9442	148.56	30.3578	-2.29091	0.0132437	0.131981	100125625	intronic
Circ_002252	78.3239	45.4866	50.574	111.489	13.7449	0	35.817	0	71.4684	12.3905	-2.52807	0.0136136	0.134512	101109507	annot_exons
Circ_002254	58.7429	68.2299	0	0	123.705	106.985	143.268	299.442	31.7432	168.35	2.40694	0.00611512	0.0740637	101102691	annot_exons
Circ_002260	156.648	0	50.574	55.7445	0	0	0	0	65.7416	0.001	-16.0045	0.00725129	0.084638	101109765	annot_exons
Circ_002264	97.9048	136.46	101.148	27.8722	0	13.3731	0	59.8883	90.8462	18.3154	-2.31037	0.0251535	0.206384	101103689	annot_exons
Circ_002265	176.229	0	126.435	139.361	0	0	0	0	110.506	0.001	-16.7538	0.000323926	0.00713259	101103689	annot_exons
Circ_002273	0	0	0	0	0	173.85	0	29.9442	0.001	50.9486	15.6368	0.0433026	0.298479	101104706	annot_exons
Circ_002297	195.81	318.406	227.583	139.361	13.7449	0	11.939	0	220.29	6.42099	-5.10046	3.5322e-08	3.21297e-06	101110015	annot_exons
Circ_002302	117.486	68.2299	75.861	167.233	13.7449	26.7462	35.817	44.9162	107.203	30.3061	-1.82266	0.0160165	0.150631	101111508	annot_exons
Circ_002311	0	0	0	0	82.4697	80.2386	95.5121	59.8883	0.001	79.5272	16.2792	6.39847e-05	0.00191366	101111764	annot_exons
Circ_002337	195.81	113.716	0	111.489	0	26.7462	11.939	59.8883	105.254	24.6434	-2.0946	0.047943	0.31945	101114661	annot_exons
Circ_002365	137.067	250.176	151.722	250.85	0	0	11.939	29.9442	197.454	10.4708	-4.23707	1.00441e-06	6.18107e-05	101119522	annot_exons
Circ_002369	0	0	0	0	13.7449	0	35.817	134.749	0.001	46.0777	15.4918	0.0378982	0.27495	101120037	annot_exons
Circ_002375	0	0	0	0	27.4899	26.7462	35.817	134.749	0.001	56.2005	15.7783	0.00556626	0.0687739	101121055	annot_exons
Circ_002392	0	0	0	0	68.7247	147.104	11.939	74.8604	0.001	75.6571	16.2072	0.00103079	0.0181638	101123519	annot_exons
Circ_002393	39.1619	0	0	0	68.7247	80.2386	35.817	269.497	9.79048	113.569	3.53605	0.00753509	0.0871408	101123519	annot_exons
Circ_002403	19.581	22.7433	0	250.85	13.7449	0	0	0	73.2936	3.43624	-4.41479	0.0440342	0.301552	101102774	annot_exons
Circ_002407	39.1619	45.4866	75.861	0	0	0	0	0	40.1274	0.001	-15.2923	0.0287941	0.226329	101104030	annot_exons
Circ_002411	156.648	318.406	278.157	83.6167	41.2348	26.7462	59.6951	0	209.207	31.919	-2.71244	0.00054787	0.0108909	101104030	annot_exons
Circ_002412	39.1619	45.4866	101.148	167.233	13.7449	0	59.6951	0	88.2575	18.36	-2.26515	0.0408922	0.288404	NA	intergenic
Circ_002421	117.486	204.69	278.157	195.106	0	53.4924	11.939	104.805	198.86	42.559	-2.22421	0.00361786	0.0495255	101106049	annot_exons
Circ_002427	391.619	68.2299	202.296	167.233	1278.28	1885.61	1361.05	1811.62	207.345	1584.14	2.9336	1.04964e-08	1.0732e-06	101106299	annot_exons
Circ_002435	19.581	45.4866	25.287	83.6167	261.154	147.104	214.902	254.525	43.4928	219.421	2.33486	0.00029806	0.00665355	101106299	annot_exons
Circ_002436	0	0	0	0	0	40.1193	83.5731	44.9162	0.001	42.1522	15.3633	0.0216049	0.185052	101106299	annot_exons
Circ_002474	156.648	272.92	75.861	111.489	41.2348	0	11.939	44.9162	154.229	24.5225	-2.6529	0.00124049	0.0210385	101111850	annot_exons
Circ_002475	234.972	227.433	50.574	139.361	13.7449	26.7462	0	44.9162	163.085	21.3518	-2.93319	0.000425782	0.0088578	101111850	annot_exons
Circ_002477	195.81	227.433	75.861	0	41.2348	0	0	44.9162	124.776	21.5378	-2.5344	0.0332279	0.250577	101112105	annot_exons
Circ_002478	78.3239	0	0	0	68.7247	80.2386	119.39	89.8325	19.581	89.5465	2.19318	0.0425986	0.295713	101121061	annot_exons
Circ_002481	117.486	22.7433	126.435	83.6167	0	0	0	0	87.5702	0.001	-16.4182	0.000233521	0.00547815	101112618	annot_exons
Circ_002502	254.553	432.123	202.296	167.233	27.4899	40.1193	0	44.9162	264.051	28.1314	-3.23057	2.48031e-06	0.000132714	101114918	annot_exons
Circ_002515	0	22.7433	0	0	13.7449	173.85	59.6951	104.805	5.68582	88.0237	3.95245	0.00845087	0.094819	101123345	annot_exons
Circ_002527	195.81	113.716	101.148	0	481.073	187.223	393.988	284.469	102.669	336.688	1.71342	0.0140442	0.137651	101123345	annot_exons
Circ_002531	58.7429	181.946	177.009	27.8722	27.4899	26.7462	0	0	111.393	13.559	-3.03833	0.0056273	0.0694631	101120374	annot_exons
Circ_002535	0	0	0	0	54.9798	53.4924	155.207	29.9442	0.001	73.4059	16.1636	0.000737758	0.0137245	443053	annot_exons
Circ_002538	234.972	68.2299	151.722	167.233	0	0	23.878	14.9721	155.539	9.71253	-4.00129	3.22948e-05	0.00110637	101122241	annot_exons
Circ_002540	646.172	545.839	227.583	334.467	109.96	320.954	155.207	254.525	438.515	210.162	-1.06113	0.0434746	0.299352	101122241	annot_exons
Circ_002553	0	0	0	0	68.7247	66.8655	191.024	89.8325	0.001	104.112	16.6678	0.000227607	0.0053848	101102113	antisense
Circ_002554	0	45.4866	25.287	0	151.194	160.477	238.78	74.8604	17.6934	156.328	3.14329	0.000602485	0.0117378	101102113	exon_intron
Circ_002556	58.7429	181.946	202.296	55.7445	13.7449	26.7462	35.817	0	124.682	19.077	-2.70835	0.0036425	0.049708	101102861	annot_exons
Circ_002557	0	22.7433	0	27.8722	109.96	106.985	35.817	149.721	12.6539	100.621	2.99127	0.0031783	0.0446434	NA	intergenic
Circ_002562	0	0	0	0	68.7247	13.3731	11.939	44.9162	0.001	34.7383	15.0842	0.0379871	0.275104	101103112	annot_exons
Circ_002569	254.553	432.123	657.462	139.361	13.7449	53.4924	119.39	0	370.875	46.6569	-2.99077	0.000414715	0.0087239	NA	intergenic
Circ_002576	58.7429	0	50.574	195.106	0	0	0	0	76.1056	0.001	-16.2157	0.00484907	0.061794	101104449	annot_exons
Circ_002578	293.715	0	75.861	278.722	0	0	0	0	162.074	0.001	-17.3063	0.000156035	0.00398072	101104952	annot_exons
Circ_002579	0	22.7433	50.574	139.361	0	0	0	0	53.1696	0.001	-15.6983	0.0251344	0.206291	101104952	annot_exons
Circ_002580	274.134	0	75.861	83.6167	0	0	0	0	108.403	0.001	-16.726	0.00078317	0.014447	101104952	annot_exons
Circ_002584	39.1619	68.2299	50.574	139.361	0	0	0	0	74.3318	0.001	-16.1817	0.00113664	0.0196354	101105204	annot_exons
Circ_002590	19.581	90.9732	25.287	167.233	0	13.3731	0	0	75.7686	3.34327	-4.50227	0.00204913	0.031634	101105204	exon_intron
Circ_002612	195.81	363.893	126.435	334.467	164.939	80.2386	59.6951	0	255.151	76.2183	-1.74314	0.0209196	0.181168	101108362	annot_exons
Circ_002613	372.038	295.663	177.009	0	13.7449	13.3731	71.6341	44.9162	211.178	35.9171	-2.55571	0.0120793	0.123177	101108362	annot_exons
Circ_002626	58.7429	68.2299	0	55.7445	0	0	0	0	45.6793	0.001	-15.4793	0.0186103	0.166881	101108443	intronic
Circ_002638	430.781	2706.45	1213.78	2536.37	68.7247	26.7462	131.329	104.805	1721.85	82.9012	-4.37642	1.16827e-08	1.17625e-06	101111770	annot_exons
Circ_002639	0	500.353	0	278.722	0	0	0	0	194.769	0.001	-17.5714	0.0012401	0.0210385	101111770	annot_exons
Circ_002641	97.9048	68.2299	101.148	0	0	0	0	0	66.8207	0.001	-16.028	0.00437203	0.0569811	101111770	annot_exons
Circ_002654	78.3239	90.9732	278.157	55.7445	0	0	23.878	29.9442	125.8	13.4555	-3.22486	0.00261175	0.0383819	101112535	annot_exons
Circ_002660	97.9048	22.7433	101.148	55.7445	0	0	0	0	69.3852	0.001	-16.0823	0.00125706	0.0212821	101113301	annot_exons
Circ_002662	137.067	90.9732	126.435	111.489	41.2348	40.1193	0	0	116.491	20.3385	-2.51793	0.00204004	0.0315442	101113301	annot_exons
Circ_002664	39.1619	22.7433	151.722	0	0	0	0	0	53.4068	0.001	-15.7047	0.023791	0.197788	101113301	annot_exons
Circ_002673	39.1619	90.9732	50.574	139.361	13.7449	13.3731	0	0	80.0176	6.77951	-3.56106	0.00220812	0.0334758	101113555	annot_exons
Circ_002687	0	0	0	0	219.919	93.6117	155.207	74.8604	0.001	135.9	17.0522	2.08875e-05	0.000772777	101114919	annot_exons
Circ_002690	352.457	113.716	75.861	222.978	13.7449	0	23.878	0	191.253	9.40574	-4.3458	2.39876e-05	0.000860911	101114583	annot_exons
Circ_002692	97.9048	113.716	101.148	0	0	0	0	14.9721	78.1923	3.74302	-4.38475	0.00665651	0.0790955	101114583	annot_exons
Circ_002693	78.3239	113.716	126.435	55.7445	13.7449	13.3731	0	0	93.555	6.77951	-3.78656	0.000363792	0.00787887	101114583	annot_exons
Circ_002694	58.7429	250.176	50.574	0	13.7449	0	11.939	0	89.8733	6.42099	-3.80702	0.00673024	0.0798997	101114583	annot_exons
Circ_002696	548.267	1046.19	657.462	808.295	247.409	320.954	262.658	224.581	765.054	263.901	-1.53557	3.11754e-05	0.0010708	101114583	annot_exons
Circ_002701	0	0	0	0	206.174	133.731	23.878	224.581	0.001	147.091	17.1664	1.58358e-05	0.000617036	101117384	annot_exons
Circ_002702	352.457	90.9732	303.444	139.361	13.7449	53.4924	47.7561	44.9162	221.559	39.9774	-2.47043	0.000489399	0.009969	101117384	annot_exons
Circ_002705	58.7429	204.69	202.296	222.978	54.9798	40.1193	71.6341	0	172.177	41.6833	-2.04635	0.00788847	0.0901994	101115599	intronic
Circ_002706	97.9048	181.946	404.592	390.211	0	13.3731	35.817	14.9721	268.664	16.0406	-4.06601	3.5669e-06	0.000176863	101115599	antisense
Circ_002727	0	0	25.287	0	82.4697	40.1193	23.878	89.8325	6.32175	59.0749	3.22415	0.0378368	0.274806	101119603	annot_exons
Circ_002728	0	0	25.287	0	54.9798	13.3731	83.5731	179.665	6.32175	82.8977	3.71294	0.0119786	0.122426	101119603	exon_intron
Circ_002731	156.648	0	101.148	0	0	13.3731	0	14.9721	64.4489	7.08629	-3.18505	0.0438685	0.301075	101119603	annot_exons
Circ_002732	78.3239	68.2299	101.148	27.8722	0	0	0	0	68.8935	0.001	-16.0721	0.00091252	0.0163085	101119603	annot_exons
Circ_002738	97.9048	0	25.287	0	261.154	200.596	286.536	209.609	30.798	239.474	2.95896	0.000113515	0.00307119	101121391	annot_exons
Circ_002747	0	0	0	0	41.2348	13.3731	35.817	44.9162	0.001	33.8353	15.0462	0.0250911	0.206192	101121651	annot_exons
Circ_002750	156.648	227.433	75.861	222.978	0	40.1193	23.878	29.9442	170.73	23.4854	-2.86188	0.000283879	0.00640037	101121651	annot_exons
Circ_002751	156.648	45.4866	0	0	0	0	0	0	50.5336	0.001	-15.625	0.0395227	0.282386	101121651	annot_exons
Circ_002752	58.7429	0	101.148	278.722	0	0	47.7561	0	109.653	11.939	-3.19919	0.0180214	0.163083	101121651	intronic
Circ_002758	97.9048	159.203	0	0	0	0	0	0	64.277	0.001	-15.972	0.0172885	0.158681	101117901	annot_exons
Circ_002774	97.9048	204.69	50.574	0	0	0	0	0	88.2921	0.001	-16.43	0.00148652	0.0244164	101117901	annot_exons
Circ_002779	0	45.4866	101.148	55.7445	0	0	11.939	0	50.5948	2.98475	-4.0833	0.0154451	0.146599	101117901	annot_exons
Circ_002783	39.1619	0	0	83.6167	178.684	387.82	358.17	793.52	30.6947	429.549	3.80676	1.43712e-05	0.000577013	101123084	annot_exons
Circ_002785	0	0	0	0	96.2146	13.3731	83.5731	59.8883	0.001	63.2623	15.9491	0.00159782	0.0258107	101123084	exon_intron
Circ_002798	19.581	0	0	0	123.705	66.8655	23.878	59.8883	4.89524	68.5841	3.80842	0.00444497	0.057562	101105125	annot_exons
Circ_002803	0	0	0	0	54.9798	40.1193	83.5731	0	0.001	44.668	15.447	0.0198214	0.17432	101106734	annot_exons
Circ_002804	0	0	0	0	412.348	361.074	262.658	224.581	0.001	315.165	18.2657	2.65967e-11	4.67729e-09	101106734	annot_exons
Circ_002805	0	0	0	0	82.4697	40.1193	11.939	74.8604	0.001	52.3471	15.6758	0.00605973	0.0734941	101106734	annot_exons
Circ_002807	0	0	0	0	54.9798	66.8655	35.817	29.9442	0.001	46.9016	15.5174	0.00539558	0.0670526	101106734	annot_exons
Circ_002823	0	0	0	0	109.96	93.6117	47.7561	0	0.001	62.8318	15.9392	0.0050621	0.0638376	101110640	annot_exons
Circ_002824	117.486	45.4866	50.574	55.7445	0	0	23.878	0	67.3227	5.96951	-3.49541	0.00537222	0.0668776	NA	intergenic
Circ_002837	0	0	0	0	82.4697	80.2386	11.939	0	0.001	43.6618	15.4141	0.0327226	0.247332	101113718	annot_exons
Circ_002871	430.781	432.123	404.592	445.956	824.697	722.147	847.67	1407.38	428.363	950.472	1.14981	0.00112414	0.0194577	101115929	annot_exons
Circ_002877	39.1619	90.9732	126.435	27.8722	27.4899	0	0	14.9721	71.1106	10.6155	-2.74389	0.0190044	0.169881	101115929	annot_exons
Circ_002881	58.7429	90.9732	151.722	111.489	13.7449	13.3731	0	0	103.232	6.77951	-3.92856	0.000187375	0.00460216	NA	intergenic
Circ_002889	19.581	22.7433	0	0	54.9798	66.8655	23.878	134.749	10.5811	70.118	2.7283	0.0311356	0.239366	101109588	annot_exons
Circ_002895	19.581	250.176	126.435	139.361	0	0	0	0	133.888	0.001	-17.0307	4.34161e-05	0.00141917	101116444	annot_exons
Circ_002896	117.486	250.176	126.435	111.489	13.7449	13.3731	23.878	29.9442	151.397	20.2351	-2.9034	0.000190037	0.00464165	101116444	annot_exons
Circ_002911	489.524	181.946	354.018	167.233	0	26.7462	0	44.9162	298.181	17.9156	-4.0569	5.01278e-07	3.34765e-05	101117130	annot_exons
Circ_002917	58.7429	45.4866	202.296	55.7445	0	0	0	0	90.5675	0.001	-16.4667	0.000368944	0.00795815	101117130	annot_exons
Circ_002940	156.648	0	75.861	139.361	54.9798	0	0	0	92.9675	13.7449	-2.75782	0.0452363	0.306601	101118494	one_exon
Circ_002967	156.648	68.2299	202.296	55.7445	13.7449	26.7462	0	44.9162	120.73	21.3518	-2.49935	0.00389026	0.0522246	100885769	annot_exons
Circ_002981	0	0	0	55.7445	123.705	133.731	47.7561	59.8883	13.9361	91.27	2.71131	0.00834605	0.0939652	101114748	exon_intron
Circ_002999	293.715	0	0	55.7445	0	0	0	14.9721	87.3647	3.74302	-4.54478	0.0288099	0.226386	101115254	annot_exons
Circ_003001	3622.48	1501.06	3894.2	2201.91	810.952	561.67	632.768	793.52	2804.91	699.727	-2.00309	1.77981e-06	9.98929e-05	101115254	annot_exons
Circ_003003	254.553	45.4866	101.148	0	27.4899	0	23.878	29.9442	100.297	20.328	-2.30273	0.0388793	0.279074	101115254	annot_exons
Circ_003004	1468.57	864.245	1289.64	696.806	343.624	173.85	298.475	299.442	1079.82	278.848	-1.95324	3.11362e-06	0.00015856	101115254	annot_exons
Circ_003021	176.229	204.69	101.148	111.489	0	26.7462	0	14.9721	148.389	10.4296	-3.83063	2.43335e-05	0.000870953	101115756	annot_exons
Circ_003040	0	45.4866	25.287	0	68.7247	200.596	262.658	89.8325	17.6934	155.453	3.1352	0.00155972	0.0253506	101105168	exon_intron
Circ_003050	0	22.7433	75.861	111.489	467.328	481.431	465.622	224.581	52.5233	409.741	2.96368	1.58059e-05	0.000616781	101105168	annot_exons
Circ_003052	0	0	0	0	41.2348	0	59.6951	44.9162	0.001	36.4615	15.1541	0.0383554	0.27682	101105168	annot_exons
Circ_003064	78.3239	272.92	0	0	0	0	0	0	87.8109	0.001	-16.4221	0.00728199	0.0848836	101105168	annot_exons
Circ_003074	352.457	136.46	455.166	529.572	563.543	802.386	919.304	1287.6	368.414	893.208	1.27767	0.0108681	0.113721	101106441	annot_exons
Circ_003079	58.7429	45.4866	0	83.6167	0	0	0	0	46.9615	0.001	-15.5192	0.0199266	0.174923	101123132	annot_exons
Circ_003083	195.81	113.716	328.731	55.7445	13.7449	0	0	0	173.5	3.43624	-5.65797	2.03848e-06	0.000112617	101123132	annot_exons
Circ_003092	137.067	113.716	101.148	0	13.7449	13.3731	0	0	87.9828	6.77951	-3.69797	0.0031612	0.0444705	101123387	annot_exons
Circ_003093	176.229	22.7433	75.861	250.85	13.7449	13.3731	59.6951	0	131.421	21.7033	-2.59821	0.0144313	0.140318	101123387	annot_exons
Circ_003103	39.1619	113.716	50.574	27.8722	13.7449	0	0	0	57.8312	3.43624	-4.07295	0.0205975	0.179202	101123387	annot_exons
Circ_003117	234.972	204.69	581.601	362.339	54.9798	93.6117	35.817	164.693	345.9	87.2753	-1.98671	0.00172072	0.0274764	101108320	annot_exons
Circ_003147	0	0	0	0	68.7247	26.7462	47.7561	44.9162	0.001	47.0358	15.5215	0.00543544	0.0674737	NA	intergenic
Circ_003159	332.876	22.7433	429.879	139.361	41.2348	26.7462	131.329	29.9442	231.215	57.3136	-2.01229	0.022392	0.189667	101111642	annot_exons
Circ_003170	195.81	113.716	25.287	0	0	0	0	14.9721	83.7033	3.74302	-4.48301	0.00883745	0.0978686	101103330	annot_exons
Circ_003178	0	113.716	126.435	55.7445	27.4899	13.3731	0	14.9721	73.974	13.9588	-2.40585	0.0481038	0.320114	101111891	annot_exons
Circ_003179	352.457	318.406	151.722	195.106	54.9798	0	0	0	254.423	13.7449	-4.21025	4.91458e-07	3.29658e-05	101111891	annot_exons
Circ_003197	685.334	568.582	531.027	668.934	54.9798	80.2386	59.6951	89.8325	613.469	71.1865	-3.10732	3.21996e-14	9.33398e-12	100174988	exon_intron
Circ_003199	0	0	0	0	0	26.7462	47.7561	59.8883	0.001	33.5976	15.0361	0.0430231	0.297454	100144755	annot_exons
Circ_003210	39.1619	0	0	0	41.2348	120.358	23.878	239.553	9.79048	106.256	3.44002	0.0142513	0.139339	101115803	annot_exons
Circ_003212	0	0	0	0	41.2348	40.1193	47.7561	14.9721	0.001	36.0206	15.1365	0.0237608	0.197662	101115803	annot_exons
Circ_003213	58.7429	0	0	0	54.9798	307.581	167.146	254.525	14.6857	196.058	3.7388	0.000423455	0.00883728	101115803	annot_exons
Circ_003215	0	0	0	0	41.2348	13.3731	119.39	14.9721	0.001	47.2425	15.5278	0.0162164	0.1518	101115803	annot_exons
Circ_003219	19.581	0	25.287	83.6167	343.624	240.716	179.085	389.274	32.1212	288.175	3.16535	1.0027e-05	0.000426142	101115803	annot_exons
Circ_003222	19.581	0	151.722	83.6167	288.644	401.193	310.414	404.246	63.7299	351.124	2.46194	0.000282087	0.00637087	101115803	annot_exons
Circ_003226	19.581	68.2299	25.287	222.978	0	26.7462	0	14.9721	84.0189	10.4296	-3.01004	0.01862	0.166897	101116064	annot_exons
Circ_003239	137.067	227.433	126.435	111.489	0	0	0	0	150.606	0.001	-17.2004	6.24929e-07	4.04044e-05	NA	intergenic
Circ_003266	78.3239	432.123	25.287	27.8722	0	13.3731	0	59.8883	140.901	18.3154	-2.94356	0.0236102	0.196843	101121103	annot_exons
Circ_003271	78.3239	68.2299	50.574	139.361	0	26.7462	0	44.9162	84.1222	17.9156	-2.23127	0.0275641	0.219968	101121865	annot_exons
Circ_003273	0	0	0	0	13.7449	80.2386	107.451	104.805	0.001	76.5598	16.2243	0.000440632	0.0091451	NA	intergenic
Circ_003278	0	0	0	0	41.2348	80.2386	23.878	0	0.001	36.3379	15.1492	0.0475525	0.31801	101122530	annot_exons
Circ_003288	391.619	500.353	328.731	306.595	0	13.3731	59.6951	29.9442	381.824	25.7531	-3.89009	1.04023e-09	1.42918e-07	101123051	annot_exons
Circ_003299	39.1619	22.7433	50.574	83.6167	0	0	0	0	49.024	0.001	-15.5812	0.0100399	0.107219	101102401	one_exon
Circ_003317	58.7429	22.7433	0	0	577.288	307.581	214.902	299.442	20.3715	349.803	4.10192	6.86886e-07	4.41936e-05	101105579	annot_exons
Circ_003320	0	0	0	0	54.9798	66.8655	11.939	14.9721	0.001	37.1891	15.1826	0.0251054	0.20622	101105579	annot_exons
Circ_003321	0	0	0	0	13.7449	160.477	167.146	104.805	0.001	111.543	16.7672	8.54421e-05	0.00240285	101105579	annot_exons
Circ_003334	0	0	0	0	123.705	187.223	107.451	74.8604	0.001	123.31	16.9119	1.96962e-05	0.000732815	101107611	annot_exons
Circ_003338	0	0	0	0	54.9798	187.223	298.475	239.553	0.001	195.058	17.5735	2.86397e-06	0.000148297	101107611	annot_exons
Circ_003340	19.581	113.716	25.287	83.6167	261.154	93.6117	811.853	568.939	60.5503	433.889	2.84112	0.000685405	0.0129264	101107611	annot_exons
Circ_003349	0	0	0	0	27.4899	53.4924	95.5121	149.721	0.001	81.5538	16.3155	0.000303462	0.00674391	101107611	annot_exons
Circ_003350	0	0	0	0	41.2348	40.1193	119.39	14.9721	0.001	53.9291	15.7188	0.00519607	0.065208	101107611	exon_intron
Circ_003356	0	0	0	0	192.429	53.4924	95.5121	134.749	0.001	119.046	16.8612	8.15265e-05	0.00231539	101107611	annot_exons
Circ_003364	176.229	68.2299	50.574	195.106	68.7247	40.1193	23.878	14.9721	122.535	36.9235	-1.73058	0.0325307	0.246576	101107611	annot_exons
Circ_003366	0	0	0	0	13.7449	0	59.6951	89.8325	0.001	40.8181	15.3169	0.0413994	0.290553	101107611	annot_exons
Circ_003389	156.648	45.4866	303.444	222.978	54.9798	13.3731	71.6341	44.9162	182.139	46.2258	-1.97827	0.00990255	0.10623	101107611	annot_exons
Circ_003390	391.619	409.379	429.879	334.467	151.194	254.089	250.719	104.805	391.336	190.202	-1.04088	0.0138572	0.136268	101107611	annot_exons
Circ_003397	19.581	113.716	101.148	0	13.7449	0	0	0	58.6114	3.43624	-4.09228	0.0385876	0.27801	101108926	annot_exons
Circ_003416	0	0	0	0	13.7449	53.4924	11.939	59.8883	0.001	34.7662	15.0854	0.0363684	0.266563	101110521	antisense
Circ_003421	19.581	22.7433	101.148	111.489	0	13.3731	0	14.9721	63.7403	7.08629	-3.1691	0.0182235	0.164302	101110521	annot_exons
Circ_003436	39.1619	0	75.861	83.6167	0	0	0	0	49.6599	0.001	-15.5998	0.0218044	0.186383	101111560	annot_exons
Circ_003438	293.715	545.839	252.87	27.8722	0	120.358	35.817	59.8883	280.074	54.0158	-2.37435	0.0116842	0.120116	101111560	annot_exons
Circ_003460	97.9048	22.7433	0	27.8722	109.96	160.477	131.329	104.805	37.1301	126.643	1.7701	0.024942	0.205287	101112580	annot_exons
Circ_003462	0	0	0	0	164.939	254.089	298.475	164.693	0.001	220.549	17.7507	1.09683e-08	1.11711e-06	101112580	annot_exons
Circ_003488	0	0	25.287	27.8722	178.684	66.8655	23.878	59.8883	13.2898	82.329	2.63108	0.0196013	0.173457	101113862	annot_exons
Circ_003489	78.3239	90.9732	25.287	222.978	27.4899	0	11.939	0	104.39	9.85723	-3.40466	0.00360045	0.049364	101113862	annot_exons
Circ_003496	0	0	0	0	151.194	53.4924	11.939	0	0.001	54.1565	15.7248	0.0224774	0.190042	101112331	annot_exons
Circ_003508	117.486	0	75.861	139.361	0	26.7462	23.878	14.9721	83.177	16.3991	-2.34257	0.0271123	0.217385	NA	intergenic
Circ_003523	0	0	0	0	13.7449	26.7462	83.5731	59.8883	0.001	45.9881	15.489	0.00979555	0.105545	101115135	annot_exons
Circ_003526	39.1619	90.9732	101.148	250.85	13.7449	13.3731	0	0	120.533	6.77951	-4.15211	0.000346824	0.00755481	NA	intergenic
Circ_003538	0	0	0	0	54.9798	26.7462	23.878	44.9162	0.001	37.6301	15.1996	0.0149737	0.14379	101116412	annot_exons
Circ_003539	0	0	0	0	54.9798	26.7462	11.939	29.9442	0.001	30.9023	14.9154	0.0447471	0.304703	101116412	annot_exons
Circ_003542	39.1619	68.2299	126.435	55.7445	13.7449	0	0	0	72.3928	3.43624	-4.39695	0.000889738	0.0159734	101116664	annot_exons
Circ_003546	39.1619	113.716	75.861	83.6167	0	0	0	0	78.089	0.001	-16.2528	0.000472304	0.00969565	101116584	annot_exons
Circ_003552	979.048	705.042	606.888	780.423	316.134	187.223	155.207	479.106	767.85	284.418	-1.43281	0.00157	0.025427	101117089	annot_exons
Circ_003563	0	0	0	0	27.4899	80.2386	35.817	44.9162	0.001	47.1154	15.5239	0.00630864	0.0760931	101118197	annot_exons
Circ_003573	0	90.9732	126.435	0	0	0	0	0	54.3521	0.001	-15.73	0.0319651	0.243701	101118795	annot_exons
Circ_003582	0	0	0	0	178.684	53.4924	23.878	104.805	0.001	90.2148	16.4611	0.000280593	0.00634799	101119830	annot_exons
Circ_003588	176.229	136.46	227.583	83.6167	41.2348	80.2386	23.878	0	155.972	36.3379	-2.10174	0.00644741	0.0772722	101119996	exon_intron
Circ_003591	39.1619	45.4866	151.722	250.85	13.7449	0	0	74.8604	121.805	22.1513	-2.45911	0.0334536	0.251763	101119996	annot_exons
Circ_003593	137.067	45.4866	50.574	55.7445	27.4899	13.3731	11.939	0	72.218	13.2005	-2.45176	0.0238652	0.198218	101119996	annot_exons
Circ_003598	58.7429	90.9732	0	139.361	0	0	23.878	0	72.2693	5.96951	-3.5977	0.0164624	0.153558	101120339	annot_exons
Circ_003607	215.391	90.9732	75.861	55.7445	0	13.3731	0	59.8883	109.492	18.3154	-2.5797	0.0115719	0.119054	101120339	annot_exons
Circ_003622	0	22.7433	252.87	334.467	0	26.7462	0	14.9721	152.52	10.4296	-3.87025	0.0069404	0.0817837	101122118	annot_exons
Circ_003629	195.81	22.7433	25.287	0	13.7449	0	0	0	60.96	3.43624	-4.14896	0.0438733	0.301075	101122799	annot_exons
Circ_003632	0	0	0	0	178.684	240.716	83.5731	119.777	0.001	155.687	17.2483	4.01597e-06	0.000196544	101123311	annot_exons
Circ_003638	0	0	0	0	27.4899	40.1193	35.817	29.9442	0.001	33.3426	15.0251	0.0209193	0.181168	101102742	annot_exons
Circ_003646	19.581	0	0	55.7445	96.2146	187.223	119.39	74.8604	18.8314	119.422	2.66486	0.00486532	0.0619412	NA	intergenic
Circ_003650	0	0	0	0	27.4899	26.7462	119.39	0	0.001	43.4066	15.4056	0.0316995	0.242248	101102743	antisense
Circ_003652	117.486	204.69	25.287	222.978	0	0	11.939	0	142.61	2.98475	-5.57832	1.50888e-05	0.000599439	100169937	exon_intron
Circ_003659	0	22.7433	0	0	329.879	213.97	334.292	179.665	5.68582	264.451	5.53949	6.2006e-09	6.84375e-07	101102993	annot_exons
Circ_003676	78.3239	45.4866	75.861	83.6167	0	13.3731	11.939	0	70.822	6.32803	-3.48437	0.00301964	0.0429639	101102993	annot_exons
Circ_003686	156.648	136.46	101.148	362.339	0	93.6117	11.939	29.9442	189.149	33.8737	-2.48128	0.00375392	0.0508339	101103904	annot_exons
Circ_003687	0	0	0	0	151.194	0	0	119.777	0.001	67.7428	16.0478	0.0158708	0.149805	NA	intergenic
Circ_003693	0	0	0	0	41.2348	40.1193	35.817	29.9442	0.001	36.7788	15.1666	0.0197833	0.17428	101104159	annot_exons
Circ_003714	0	0	0	0	687.247	334.327	238.78	509.051	0.001	442.351	18.7548	2.38815e-11	4.22798e-09	101106341	exon_intron
Circ_003717	19.581	0	0	0	508.563	227.343	23.878	134.749	4.89524	223.633	5.51361	0.000180891	0.00445679	101106341	one_exon
Circ_003718	0	0	0	0	164.939	106.985	95.5121	14.9721	0.001	95.6021	16.5448	0.00017848	0.00441249	101106341	annot_exons
Circ_003719	0	0	0	0	13.7449	40.1193	59.6951	59.8883	0.001	43.3619	15.4041	0.0112477	0.116446	101106341	exon_intron
Circ_003720	0	0	0	55.7445	164.939	133.731	71.6341	149.721	13.9361	130.006	3.22168	0.00105402	0.0184499	101106341	annot_exons
Circ_003722	0	0	0	0	54.9798	13.3731	0	89.8325	0.001	39.5463	15.2713	0.0426925	0.295975	101106341	exon_intron
Circ_003728	0	0	0	0	41.2348	26.7462	11.939	59.8883	0.001	34.9521	15.0931	0.0296643	0.231035	101106341	exon_intron
Circ_003740	156.648	68.2299	0	83.6167	0	0	0	0	77.1236	0.001	-16.2349	0.00219048	0.033285	101106534	annot_exons
Circ_003757	372.038	0	75.861	195.106	13.7449	0	23.878	14.9721	160.751	13.1488	-3.61183	0.00390468	0.0523915	101109458	one_exon
Circ_003761	0	0	0	0	82.4697	0	59.6951	44.9162	0.001	46.7703	15.5133	0.0138355	0.136191	NA	intergenic
Circ_003812	78.3239	45.4866	101.148	55.7445	0	0	0	0	70.1757	0.001	-16.0987	0.00069507	0.0130407	101112235	annot_exons
Circ_003817	58.7429	0	75.861	27.8722	0	0	0	0	40.619	0.001	-15.3099	0.0325447	0.246576	101112742	annot_exons
Circ_003821	117.486	136.46	0	55.7445	0	26.7462	0	0	77.4225	6.68655	-3.53342	0.00959398	0.104062	101112990	annot_exons
Circ_003827	0	68.2299	25.287	55.7445	0	0	0	0	37.3153	0.001	-15.1875	0.0479436	0.31945	101113249	annot_exons
Circ_003838	0	0	0	0	82.4697	26.7462	143.268	119.777	0.001	93.0652	16.506	8.88135e-05	0.00248179	NA	intergenic
Circ_003841	39.1619	0	50.574	83.6167	0	0	0	0	43.3382	0.001	-15.4034	0.0305272	0.235937	106990123	annot_exons
Circ_003842	19.581	22.7433	151.722	55.7445	27.4899	0	0	0	62.4477	6.87247	-3.18375	0.0275679	0.219968	106990123	annot_exons
Circ_003861	0	0	0	0	13.7449	66.8655	167.146	59.8883	0.001	76.9112	16.2309	0.000875023	0.0157665	101115289	annot_exons
Circ_003862	0	0	0	0	13.7449	40.1193	191.024	44.9162	0.001	72.4512	16.1447	0.00230005	0.0345321	101115289	annot_exons
Circ_003867	97.9048	272.92	556.314	250.85	0	0	23.878	104.805	294.497	32.1706	-3.19444	0.000858518	0.0154903	101115289	annot_exons
Circ_003869	0	0	0	0	27.4899	93.6117	11.939	14.9721	0.001	37.0032	15.1754	0.0320426	0.24401	101115289	annot_exons
Circ_003879	39.1619	0	0	0	123.705	26.7462	119.39	89.8325	9.79048	89.9183	3.19916	0.00842918	0.0946978	101116845	annot_exons
Circ_003880	58.7429	68.2299	252.87	278.722	467.328	374.447	501.439	344.358	164.641	421.893	1.35755	0.0184564	0.165825	101116845	annot_exons
Circ_003907	0	0	0	0	54.9798	0	23.878	59.8883	0.001	34.6865	15.0821	0.0449675	0.305642	101121434	antisense
Circ_003919	156.648	0	202.296	111.489	27.4899	40.1193	47.7561	0	117.608	28.8413	-2.02778	0.0415686	0.291091	101120591	annot_exons
Circ_003923	0	0	0	0	68.7247	40.1193	23.878	29.9442	0.001	40.6666	15.3116	0.0158378	0.149637	101118709	annot_exons
Circ_003929	0	0	0	0	41.2348	66.8655	35.817	44.9162	0.001	47.2084	15.5268	0.00490111	0.0623012	101118709	annot_exons
Circ_003948	39.1619	0	25.287	27.8722	288.644	160.477	191.024	149.721	23.0803	197.467	3.09687	3.71513e-05	0.00123676	101121021	one_exon
Circ_003951	0	0	0	0	27.4899	106.985	59.6951	74.8604	0.001	67.2575	16.0374	0.000661905	0.0125795	101105087	annot_exons
Circ_003953	19.581	0	75.861	27.8722	2391.62	2019.34	2626.58	2635.09	30.8286	2418.16	6.2935	3.38054e-35	1.48625e-31	101105087	annot_exons
Circ_003955	430.781	477.609	455.166	250.85	714.737	1230.32	1301.35	1362.46	403.602	1152.22	1.51341	8.0913e-05	0.00230249	101105087	annot_exons
Circ_003957	0	0	0	0	41.2348	13.3731	11.939	74.8604	0.001	35.3518	15.1095	0.0391004	0.280051	101105087	one_exon
Circ_003974	0	0	0	0	68.7247	40.1193	59.6951	29.9442	0.001	49.6208	15.5987	0.00338369	0.0468794	101102402	exon_intron
Circ_003987	0	22.7433	0	0	27.4899	53.4924	47.7561	74.8604	5.68582	50.8997	3.16222	0.0456952	0.309075	101106345	annot_exons
Circ_003989	19.581	0	0	0	41.2348	40.1193	83.5731	74.8604	4.89524	59.9469	3.61423	0.00644097	0.0772301	101106345	annot_exons
Circ_003998	0	136.46	0	55.7445	164.939	320.954	167.146	179.665	48.0511	208.176	2.11516	0.0112471	0.116446	101106605	annot_exons
Circ_004004	19.581	0	25.287	0	82.4697	147.104	143.268	119.777	11.217	123.155	3.45671	0.000238042	0.00555691	101106605	annot_exons
Circ_004010	39.1619	113.716	75.861	83.6167	247.409	361.074	191.024	224.581	78.089	256.022	1.71308	0.00230828	0.0346163	101106605	annot_exons
Circ_004034	332.876	727.785	227.583	250.85	96.2146	80.2386	119.39	104.805	384.774	100.162	-1.94168	0.000580435	0.0113839	NA	intergenic
Circ_004044	195.81	204.69	75.861	55.7445	0	13.3731	0	0	133.026	3.34327	-5.31431	8.84736e-06	0.000385123	101107616	annot_exons
Circ_004045	0	0	0	0	68.7247	26.7462	35.817	0	0.001	32.822	15.0024	0.0460701	0.310814	101107616	annot_exons
Circ_004056	881.144	545.839	834.471	668.934	68.7247	160.477	11.939	104.805	732.597	86.4864	-3.08247	1.91816e-08	1.80749e-06	101107879	annot_exons
Circ_004057	195.81	45.4866	0	111.489	0	0	0	14.9721	88.1963	3.74302	-4.55844	0.00702225	0.0824021	101107879	annot_exons
Circ_004058	137.067	136.46	101.148	111.489	0	0	11.939	74.8604	121.541	21.6999	-2.48568	0.00331615	0.0461618	101107879	annot_exons
Circ_004078	234.972	0	50.574	0	0	0	11.939	0	71.3864	2.98475	-4.57997	0.0436034	0.300004	101108670	annot_exons
Circ_004102	156.648	45.4866	0	27.8722	0	0	11.939	14.9721	57.5016	6.72777	-3.0954	0.035109	0.259933	101108927	annot_exons
Circ_004106	39.1619	0	101.148	55.7445	0	0	0	0	49.0136	0.001	-15.5809	0.0231028	0.193962	101108927	annot_exons
Circ_004110	0	0	0	0	27.4899	80.2386	35.817	74.8604	0.001	54.6015	15.7367	0.00266207	0.0389262	101109192	annot_exons
Circ_004151	58.7429	45.4866	25.287	27.8722	178.684	267.462	155.207	134.749	39.3472	184.026	2.22557	0.000978914	0.0173891	101110252	annot_exons
Circ_004182	0	0	0	0	27.4899	147.104	35.817	134.749	0.001	86.2899	16.3969	0.000384996	0.00820341	101113866	annot_exons
Circ_004183	19.581	159.203	25.287	0	591.033	949.49	728.28	718.66	51.0178	746.866	3.87178	7.89484e-08	6.54899e-06	101113866	annot_exons
Circ_004188	0	0	0	0	481.073	213.97	226.841	329.386	0.001	312.817	18.255	4.35205e-10	6.56016e-08	101113866	one_exon
Circ_004191	0	0	0	0	54.9798	0	59.6951	29.9442	0.001	36.1548	15.1419	0.0409516	0.288404	101118966	annot_exons
Circ_004192	0	0	25.287	0	219.919	26.7462	23.878	134.749	6.32175	101.323	4.00249	0.0076943	0.0884778	101118966	annot_exons
Circ_004196	0	0	0	0	27.4899	26.7462	35.817	29.9442	0.001	29.9993	14.8726	0.0344388	0.256266	101118966	annot_exons
Circ_004200	78.3239	22.7433	0	111.489	0	0	0	0	53.139	0.001	-15.6975	0.0194648	0.172888	101115139	annot_exons
Circ_004203	78.3239	113.716	50.574	0	13.7449	0	0	0	60.6536	3.43624	-4.14169	0.026122	0.211762	101115139	annot_exons
Circ_004207	19.581	90.9732	50.574	55.7445	0	0	0	0	54.2182	0.001	-15.7265	0.0069488	0.0818021	101115139	annot_exons
Circ_004217	78.3239	45.4866	101.148	83.6167	0	0	0	14.9721	77.1438	3.74302	-4.36528	0.000345709	0.00753674	101115887	annot_exons
Circ_004229	0	0	0	0	13.7449	66.8655	71.6341	29.9442	0.001	45.5472	15.4751	0.0088056	0.0975569	101122957	annot_exons
Circ_004249	313.295	227.433	328.731	195.106	0	0	0	194.637	266.141	48.6593	-2.45141	0.0276119	0.220185	101117432	annot_exons
Circ_004277	0	0	25.287	27.8722	357.369	387.82	95.5121	344.358	13.2898	296.265	4.47849	1.88113e-06	0.00010491	NA	intergenic
Circ_004278	0	0	25.287	27.8722	398.604	468.058	143.268	434.19	13.2898	361.03	4.76373	6.36269e-08	5.41821e-06	NA	intergenic
Circ_004279	0	0	0	0	54.9798	160.477	35.817	74.8604	0.001	81.5336	16.3151	0.000280165	0.00634376	NA	intergenic
Circ_004303	78.3239	22.7433	101.148	139.361	13.7449	13.3731	35.817	0	85.3941	15.7338	-2.44027	0.0149646	0.143755	101122802	annot_exons
Circ_004313	0	0	0	0	41.2348	26.7462	35.817	29.9442	0.001	33.4356	15.0291	0.0210399	0.181673	101113605	annot_exons
Circ_004324	39.1619	0	50.574	83.6167	0	0	0	0	43.3382	0.001	-15.4034	0.0305353	0.235937	101103249	annot_exons
Circ_004346	0	0	0	0	82.4697	53.4924	95.5121	44.9162	0.001	69.0976	16.0763	0.000413748	0.0087239	101122289	exon_intron
Circ_004347	0	0	0	0	1347	829.132	931.243	598.883	0.001	926.566	19.8215	5.01927e-18	2.81709e-15	101122289	exon_intron
Circ_004364	0	0	0	0	96.2146	53.4924	214.902	134.749	0.001	124.839	16.9297	6.25294e-05	0.00188653	101103164	annot_exons
Circ_004368	0	0	0	0	27.4899	120.358	59.6951	14.9721	0.001	55.6287	15.7635	0.00548454	0.0680191	101103655	antisense
Circ_004371	234.972	0	252.87	55.7445	41.2348	0	11.939	29.9442	135.897	20.7795	-2.70928	0.015316	0.146014	101104412	annot_exons
Circ_004373	0	0	0	0	82.4697	40.1193	11.939	14.9721	0.001	37.375	15.1898	0.0276503	0.220355	101104412	annot_exons
Circ_004392	58.7429	22.7433	101.148	83.6167	0	0	0	0	66.5627	0.001	-16.0224	0.00178095	0.028233	101114539	annot_exons
Circ_004394	176.229	45.4866	25.287	55.7445	192.429	267.462	262.658	224.581	75.6867	236.783	1.64545	0.00860508	0.0960616	101114539	annot_exons
Circ_004407	0	0	0	0	68.7247	160.477	238.78	119.777	0.001	146.94	17.1649	1.04322e-05	0.000441013	101118116	one_exon
Circ_004408	0	0	0	0	233.664	347.7	358.17	164.693	0.001	276.057	18.0746	9.49478e-10	1.3252e-07	101118116	one_exon
Circ_004420	0	0	0	0	68.7247	40.1193	35.817	14.9721	0.001	39.9083	15.2844	0.0176116	0.160531	105607823	antisense
Circ_004421	0	0	0	0	164.939	106.985	191.024	119.777	0.001	145.681	17.1525	1.73231e-06	9.80615e-05	105607823	one_exon
Circ_004422	0	0	0	0	68.7247	26.7462	47.7561	29.9442	0.001	43.2928	15.4018	0.00962755	0.104309	105607823	antisense
Circ_004439	0	0	0	0	0	66.8655	107.451	89.8325	0.001	66.0373	16.011	0.00308692	0.0436856	101104254	annot_exons
Circ_004442	0	0	0	0	41.2348	93.6117	47.7561	14.9721	0.001	49.3937	15.592	0.00834465	0.0939652	101104254	annot_exons
Circ_004445	0	0	0	0	41.2348	66.8655	71.6341	104.805	0.001	71.1347	16.1183	0.000415241	0.00872801	101104254	annot_exons
Circ_004451	0	0	0	0	41.2348	13.3731	71.6341	74.8604	0.001	50.2756	15.6176	0.00549421	0.068075	101104254	annot_exons
Circ_004454	0	0	0	0	27.4899	53.4924	143.268	29.9442	0.001	63.5487	15.9556	0.00229281	0.0344431	101104254	annot_exons
Circ_004459	0	0	0	0	82.4697	26.7462	47.7561	44.9162	0.001	50.472	15.6232	0.0038474	0.0517545	101120679	annot_exons
Circ_004465	19.581	0	0	0	54.9798	66.8655	107.451	104.805	4.89524	83.5252	4.09276	0.00243088	0.036045	101108583	annot_exons
Circ_004480	0	0	0	0	96.2146	80.2386	23.878	0	0.001	50.0828	15.612	0.014091	0.138011	101102405	exon_intron
Circ_004508	0	0	0	0	27.4899	80.2386	0	29.9442	0.001	34.4182	15.0709	0.0498129	0.32883	101114536	annot_exons
Circ_004509	0	0	0	0	27.4899	213.97	11.939	44.9162	0.001	74.5787	16.1865	0.00351836	0.0484905	101114536	annot_exons
Circ_004515	469.943	727.785	1062.05	696.806	164.939	227.343	35.817	389.274	739.147	204.343	-1.85487	0.00264052	0.0387184	101115045	annot_exons
Circ_004522	0	0	0	0	82.4697	13.3731	35.817	29.9442	0.001	40.401	15.3021	0.0215898	0.185052	101115045	annot_exons
Circ_004527	0	0	0	0	0	26.7462	47.7561	59.8883	0.001	33.5976	15.0361	0.0430298	0.297454	NA	intergenic
Circ_004529	0	0	0	0	96.2146	26.7462	95.5121	44.9162	0.001	65.8473	16.0068	0.00113533	0.0196257	NA	intergenic
Circ_004533	39.1619	22.7433	25.287	27.8722	96.2146	106.985	71.6341	209.609	28.7661	121.111	2.07388	0.00926196	0.101378	NA	intergenic
Circ_004535	0	0	0	27.8722	27.4899	160.477	59.6951	89.8325	6.96806	84.3736	3.59796	0.00671412	0.0797442	101104413	annot_exons
Circ_004540	646.172	796.015	834.471	668.934	1347	1858.86	2423.62	1512.18	736.398	1785.42	1.2777	3.32626e-05	0.00113217	101115807	annot_exons
Circ_004542	0	0	0	0	41.2348	53.4924	59.6951	44.9162	0.001	49.8346	15.6049	0.00271534	0.0395173	101116328	exon_intron
Circ_004543	0	0	25.287	0	288.644	307.581	322.353	628.827	6.32175	386.851	5.93531	9.24136e-10	1.29669e-07	NA	intergenic
Circ_004545	0	22.7433	0	0	96.2146	106.985	107.451	179.665	5.68582	122.579	4.4302	9.10135e-05	0.00253567	443016	one_exon
Circ_004546	0	0	0	0	27.4899	106.985	35.817	44.9162	0.001	53.802	15.7154	0.0050397	0.063759	443016	one_exon
Circ_004547	19.581	0	25.287	0	54.9798	93.6117	47.7561	104.805	11.217	75.288	2.74673	0.0142266	0.139148	443016	one_exon
Circ_004551	665.753	909.732	859.758	668.934	82.4697	320.954	119.39	299.442	776.044	205.564	-1.91655	0.000104394	0.00285073	101117774	annot_exons
Circ_004560	0	0	0	0	68.7247	106.985	95.5121	29.9442	0.001	75.2914	16.2002	0.00022546	0.00534582	101117774	annot_exons
Circ_004565	0	0	25.287	0	439.838	695.401	573.073	389.274	6.32175	524.397	6.37419	6.49473e-14	1.79715e-11	101117774	annot_exons
Circ_004572	0	0	0	0	192.429	147.104	370.109	194.637	0.001	226.07	17.7864	4.43546e-08	3.9528e-06	101107974	annot_exons
Circ_004573	0	0	0	0	13.7449	66.8655	71.6341	0	0.001	38.0611	15.216	0.0399766	0.284467	101107974	annot_exons
Circ_004577	0	0	0	0	54.9798	334.327	167.146	74.8604	0.001	157.828	17.268	9.84029e-06	0.000421391	101107974	annot_exons
Circ_004601	0	0	0	0	109.96	147.104	155.207	164.693	0.001	144.241	17.1381	1.39324e-06	8.14906e-05	101111111	one_exon
Circ_004617	117.486	22.7433	75.861	111.489	0	0	0	14.9721	81.8948	3.74302	-4.4515	0.000449503	0.00927087	101102913	annot_exons
Circ_004619	0	0	0	0	82.4697	53.4924	47.7561	44.9162	0.001	57.1586	15.8027	0.00171367	0.0273803	101102913	exon_intron
Circ_004629	254.553	295.663	354.018	529.572	13.7449	0	0	29.9442	358.451	10.9223	-5.03643	2.3764e-11	4.22798e-09	443483	annot_exons
Circ_004645	0	250.176	151.722	195.106	27.4899	26.7462	0	0	149.251	13.559	-3.46042	0.00483841	0.061688	101112073	annot_exons
Circ_004651	0	0	25.287	0	82.4697	106.985	107.451	59.8883	6.32175	89.1985	3.81862	0.00105255	0.0184458	101119323	annot_exons
Circ_004668	58.7429	68.2299	101.148	0	0	0	0	14.9721	57.0302	3.74302	-3.92945	0.0336685	0.252743	101122874	annot_exons
Circ_004699	0	0	0	0	82.4697	80.2386	71.6341	104.805	0.001	84.7867	16.3716	0.000305114	0.00676169	101102654	annot_exons
Circ_004708	372.038	0	354.018	306.595	96.2146	53.4924	59.6951	44.9162	258.163	63.5796	-2.02165	0.0224107	0.189667	101107536	annot_exons
Circ_004709	293.715	454.866	783.897	1031.27	109.96	187.223	167.146	224.581	640.938	172.228	-1.89587	0.000501742	0.010189	101107536	annot_exons
Circ_004726	0	113.716	25.287	139.361	0	0	0	29.9442	69.5912	7.48604	-3.21663	0.0275308	0.219805	101122961	annot_exons
Circ_004732	2114.74	2115.13	2731	3316.8	5814.11	4506.73	5324.8	6467.94	2569.42	5528.4	1.10542	1.68057e-05	0.000648126	101111036	exon_intron
Circ_004741	97.9048	250.176	126.435	306.595	41.2348	0	23.878	29.9442	195.278	23.7643	-3.03866	0.000162515	0.00411815	101113086	antisense
Circ_004742	19.581	181.946	75.861	0	0	0	0	0	69.3471	0.001	-16.0815	0.00812952	0.092241	101113086	antisense
Circ_004745	352.457	1046.19	379.305	111.489	0	0	0	0	472.361	0.001	-18.8495	5.47937e-09	6.17693e-07	101113086	exon_intron
Circ_004746	19.581	22.7433	75.861	139.361	0	0	0	0	64.3866	0.001	-15.9745	0.00579435	0.0709277	101113086	intronic
Circ_004751	0	0	0	27.8722	137.449	173.85	179.085	104.805	6.96806	148.797	4.41645	8.67505e-06	0.000378944	101109026	annot_exons
Circ_004756	58.7429	90.9732	25.287	0	0	0	0	0	43.7508	0.001	-15.417	0.0232708	0.195	NA	intergenic
Circ_004774	0	0	0	0	123.705	53.4924	131.329	29.9442	0.001	84.6176	16.3687	0.000187548	0.00460216	NA	intergenic
Circ_004779	0	363.893	429.879	0	0	0	47.7561	14.9721	198.443	15.682	-3.66154	0.0171474	0.157661	101116241	exon_intron
Circ_004799	0	0	0	0	96.2146	80.2386	95.5121	134.749	0.001	101.679	16.6337	6.37321e-05	0.00190827	101120000	annot_exons
Circ_004800	0	0	0	0	27.4899	26.7462	47.7561	29.9442	0.001	32.9841	15.0095	0.0222895	0.189219	101120000	annot_exons
Circ_004812	0	0	0	0	68.7247	26.7462	0	59.8883	0.001	38.8398	15.2452	0.0315627	0.241541	101120590	annot_exons
Circ_004813	0	0	0	0	41.2348	40.1193	23.878	14.9721	0.001	30.0511	14.8751	0.0398937	0.284037	101120590	annot_exons
Circ_004818	176.229	500.353	354.018	250.85	41.2348	160.477	131.329	89.8325	320.362	105.718	-1.59948	0.00619634	0.074807	101121022	annot_exons
Circ_004819	195.81	22.7433	126.435	0	0	0	11.939	14.9721	86.247	6.72777	-3.68027	0.00821126	0.0929634	101121022	annot_exons
Circ_004821	528.686	90.9732	202.296	167.233	0	13.3731	0	44.9162	247.297	14.5723	-4.08494	3.63579e-05	0.00121866	101121022	annot_exons
Circ_004822	372.038	204.69	50.574	83.6167	27.4899	13.3731	71.6341	29.9442	177.73	35.6103	-2.31932	0.00489053	0.0622022	101121022	annot_exons
Circ_004829	97.9048	90.9732	227.583	55.7445	0	0	0	14.9721	118.051	3.74302	-4.97907	2.6205e-05	0.000922914	101121788	annot_exons
Circ_004831	78.3239	90.9732	0	55.7445	0	0	0	0	56.2604	0.001	-15.7798	0.00951856	0.103542	101121788	annot_exons
Circ_004846	0	0	0	0	0	106.985	0	134.749	0.001	60.4334	15.8831	0.02036	0.177605	101121788	annot_exons
Circ_004855	19.581	0	0	0	123.705	147.104	83.5731	59.8883	4.89524	103.568	4.40305	0.000498966	0.010143	106990151	annot_exons
Circ_004864	117.486	181.946	252.87	195.106	27.4899	0	23.878	59.8883	186.852	27.8141	-2.74801	7.45525e-05	0.00214931	101122708	annot_exons
Circ_004871	0	0	0	0	41.2348	120.358	11.939	44.9162	0.001	54.612	15.7369	0.00580412	0.0710144	101123389	annot_exons
Circ_004872	0	0	0	0	123.705	307.581	370.109	254.525	0.001	263.98	18.0101	9.03112e-09	9.64502e-07	101123389	annot_exons
Circ_004881	19.581	0	0	0	68.7247	53.4924	23.878	74.8604	4.89524	55.2389	3.49623	0.0113585	0.117316	101102073	annot_exons
Circ_004885	293.715	409.379	151.722	195.106	178.684	80.2386	23.878	119.777	262.48	100.644	-1.38294	0.0293969	0.229494	101102073	annot_exons
Circ_004894	39.1619	45.4866	101.148	167.233	0	26.7462	0	14.9721	88.2575	10.4296	-3.08104	0.0070981	0.0830704	101102073	annot_exons
Circ_004898	0	0	0	0	54.9798	53.4924	143.268	59.8883	0.001	77.9072	16.2495	0.000246535	0.00571707	554335	annot_exons
Circ_004912	19.581	45.4866	75.861	83.6167	0	13.3731	23.878	0	56.1363	9.31278	-2.59165	0.0497837	0.328722	101123056	intronic
Circ_004915	156.648	45.4866	177.009	139.361	0	0	11.939	14.9721	129.626	6.72777	-4.26808	4.39493e-05	0.00143128	101123056	exon_intron
Circ_004919	0	0	0	0	82.4697	66.8655	23.878	14.9721	0.001	47.0463	15.5218	0.00981594	0.105688	101102746	annot_exons
Circ_004934	489.524	477.609	657.462	418.084	2735.24	2286.8	3163.84	2230.84	510.67	2604.18	2.35037	7.00992e-17	3.13415e-14	101106443	annot_exons
Circ_004957	704.915	955.218	910.332	557.445	151.194	133.731	167.146	149.721	781.978	150.448	-2.37786	4.24855e-10	6.47818e-08	105612388	annot_exons
Circ_004958	58.7429	0	25.287	27.8722	164.939	160.477	83.5731	89.8325	27.9755	124.706	2.15629	0.00760342	0.087777	105612388	annot_exons
Circ_004961	0	0	0	0	123.705	147.104	179.085	359.33	0.001	202.306	17.6262	5.20888e-07	3.45239e-05	101106024	exon_intron
Circ_004962	39.1619	0	0	0	41.2348	66.8655	107.451	119.777	9.79048	83.832	3.09805	0.0107575	0.112742	101106024	antisense
Circ_004963	0	0	0	0	41.2348	13.3731	35.817	74.8604	0.001	41.3213	15.3346	0.0190836	0.170473	101106024	antisense
Circ_004964	0	0	0	0	467.328	53.4924	0	0	0.001	130.205	16.9904	0.00576557	0.070769	101106024	antisense
Circ_004965	0	0	25.287	0	123.705	66.8655	59.6951	434.19	6.32175	171.114	4.75849	0.000456078	0.00939179	101106024	antisense
Circ_004981	117.486	22.7433	25.287	27.8722	0	13.3731	0	14.9721	48.3471	7.08629	-2.77033	0.0380563	0.275339	NA	intergenic
Circ_004983	0	0	0	0	274.899	133.731	155.207	74.8604	0.001	159.674	17.2848	5.73909e-06	0.000266465	101116491	annot_exons
Circ_005039	0	0	0	27.8722	261.154	120.358	202.963	134.749	6.96806	179.806	4.68954	2.55457e-06	0.000135861	101115294	annot_exons
Circ_005056	0	0	0	0	54.9798	26.7462	23.878	74.8604	0.001	45.1161	15.4614	0.0106708	0.112101	101117092	annot_exons
Circ_005060	0	113.716	50.574	55.7445	0	0	0	0	55.0087	0.001	-15.7474	0.0127538	0.1285	NA	intergenic
Circ_005078	19.581	113.716	75.861	139.361	0	0	0	14.9721	87.1299	3.74302	-4.54089	0.00238834	0.0355743	100217405	annot_exons
Circ_005082	19.581	45.4866	278.157	83.6167	27.4899	0	0	29.9442	106.71	14.3585	-2.89372	0.016105	0.151348	101111818	annot_exons
Circ_005088	0	0	0	0	164.939	173.85	47.7561	29.9442	0.001	104.122	16.6679	0.00013177	0.00346557	101113084	annot_exons
Circ_005095	0	0	0	0	27.4899	13.3731	59.6951	59.8883	0.001	40.1116	15.2917	0.0191458	0.170854	NA	intergenic
Circ_005113	0	0	0	0	13.7449	13.3731	107.451	89.8325	0.001	56.1004	15.7757	0.00777546	0.0892166	101108240	annot_exons
Circ_005136	19.581	45.4866	75.861	83.6167	13.7449	13.3731	0	0	56.1363	6.77951	-3.04968	0.017689	0.161013	101117261	antisense
Circ_005137	0	0	0	0	82.4697	66.8655	71.6341	164.693	0.001	96.4155	16.557	0.000298135	0.00665355	101117261	annot_exons
Circ_005139	0	0	0	0	27.4899	66.8655	59.6951	29.9442	0.001	45.9987	15.4893	0.00608317	0.0737106	101117261	annot_exons
Circ_005143	78.3239	159.203	303.444	27.8722	41.2348	26.7462	47.7561	14.9721	142.211	32.6773	-2.12167	0.0170613	0.157199	101117261	annot_exons
Circ_005145	117.486	45.4866	75.861	27.8722	0	0	23.878	14.9721	66.6764	9.71253	-2.77926	0.0170951	0.157346	101117261	annot_exons
Circ_005147	78.3239	90.9732	25.287	0	0	0	0	0	48.646	0.001	-15.57	0.0173169	0.158778	101117261	annot_exons
Circ_005152	0	90.9732	25.287	139.361	549.798	829.132	728.28	853.408	63.9053	740.155	3.53382	1.88529e-08	1.78893e-06	101117261	annot_exons
Circ_005168	0	0	0	0	41.2348	13.3731	11.939	89.8325	0.001	39.0949	15.2547	0.0298988	0.232518	101117777	annot_exons
Circ_005214	58.7429	113.716	25.287	111.489	0	0	0	0	77.3088	0.001	-16.2383	0.000785804	0.0144855	101120257	annot_exons
Circ_005232	39.1619	0	0	0	41.2348	13.3731	131.329	74.8604	9.79048	65.1994	2.73541	0.0317193	0.242248	105611808	intronic
Circ_005236	0	68.2299	328.731	55.7445	0	0	0	0	113.176	0.001	-16.7882	0.00144548	0.0238425	101123479	annot_exons
Circ_005238	0	0	0	0	82.4697	0	59.6951	29.9442	0.001	43.0272	15.393	0.0225496	0.19047	NA	intergenic
Circ_005256	0	0	0	0	54.9798	40.1193	107.451	29.9442	0.001	58.1236	15.8268	0.00194228	0.0303347	101121111	annot_exons
Circ_005257	0	0	0	0	192.429	133.731	71.6341	194.637	0.001	148.108	17.1763	5.69854e-06	0.000265916	101121111	annot_exons
Circ_005258	0	45.4866	0	0	618.523	414.566	752.158	598.883	11.3716	596.032	5.71188	4.87643e-14	1.36846e-11	101121111	annot_exons
Circ_005259	0	0	0	0	54.9798	53.4924	83.5731	74.8604	0.001	66.7264	16.026	0.000532656	0.0106205	101121111	annot_exons
Circ_005263	372.038	272.92	404.592	250.85	41.2348	26.7462	47.7561	44.9162	325.1	40.1633	-3.01693	5.51028e-08	4.71934e-06	554322	annot_exons
Circ_005269	39.1619	45.4866	75.861	0	0	0	0	0	40.1274	0.001	-15.2923	0.0287848	0.226323	101104590	annot_exons
Circ_005276	58.7429	250.176	0	27.8722	0	26.7462	0	0	84.1978	6.68655	-3.65445	0.0166103	0.1545	101122877	annot_exons
Circ_005277	372.038	1614.77	809.184	919.784	27.4899	40.1193	250.719	134.749	928.945	113.269	-3.03584	5.47643e-05	0.00171164	101122877	annot_exons
Circ_005296	39.1619	159.203	202.296	83.6167	41.2348	26.7462	0	0	121.069	16.9953	-2.83263	0.00267907	0.0391313	101106862	annot_exons
Circ_005298	0	68.2299	0	0	233.664	240.716	262.658	269.497	17.0575	251.634	3.88285	6.4015e-07	4.12873e-05	101106862	annot_exons
Circ_005302	97.9048	90.9732	75.861	27.8722	13.7449	40.1193	0	0	73.1528	13.4661	-2.44159	0.0252008	0.206644	101107807	annot_exons
Circ_005303	0	0	25.287	195.106	0	0	0	0	55.0982	0.001	-15.7497	0.048964	0.324447	101107807	annot_exons
Circ_005326	293.715	227.433	429.879	306.595	109.96	160.477	35.817	179.665	314.405	121.48	-1.37191	0.00941519	0.102799	101104330	annot_exons
Circ_005327	234.972	227.433	101.148	111.489	54.9798	66.8655	47.7561	59.8883	168.76	57.3724	-1.55655	0.010537	0.111004	101104330	annot_exons
Circ_005332	0	0	0	0	13.7449	66.8655	11.939	104.805	0.001	49.3385	15.5904	0.015311	0.146014	101104330	annot_exons
Circ_005335	0	0	0	27.8722	54.9798	80.2386	59.6951	104.805	6.96806	74.9295	3.42671	0.00517356	0.0650803	101104330	annot_exons
Circ_005338	0	0	0	0	96.2146	26.7462	71.6341	0	0.001	48.6487	15.5701	0.0171737	0.157849	101104330	annot_exons
Circ_005339	0	0	0	0	82.4697	106.985	35.817	44.9162	0.001	67.5469	16.0436	0.000633402	0.0121605	101104330	annot_exons
Circ_005347	0	0	0	0	41.2348	0	35.817	59.8883	0.001	34.2351	15.0632	0.0405221	0.287089	101104330	annot_exons
Circ_005348	0	0	0	0	41.2348	26.7462	83.5731	0	0.001	37.8885	15.2095	0.0341996	0.255147	101104330	annot_exons
Circ_005351	0	0	50.574	0	13.7449	53.4924	59.6951	224.581	12.6435	87.8784	2.79711	0.0371298	0.270565	101104330	annot_exons
Circ_005355	0	0	0	0	82.4697	40.1193	71.6341	44.9162	0.001	59.7848	15.8675	0.00116519	0.0200238	101104330	annot_exons
Circ_005380	0	0	0	0	41.2348	66.8655	143.268	59.8883	0.001	77.8142	16.2477	0.000271193	0.00617239	101104330	annot_exons
Circ_005381	19.581	0	0	0	82.4697	93.6117	119.39	284.469	4.89524	144.985	4.88838	0.000128742	0.00341658	101104330	annot_exons
Circ_005384	0	0	0	0	54.9798	53.4924	47.7561	0	0.001	39.0571	15.2533	0.0263778	0.213115	101104330	annot_exons
Circ_005389	0	45.4866	0	0	82.4697	40.1193	47.7561	209.609	11.3716	94.9885	3.06231	0.0131847	0.131692	101104593	annot_exons
Circ_005406	19.581	90.9732	25.287	27.8722	0	0	0	0	40.9283	0.001	-15.3208	0.0215253	0.184779	101114291	annot_exons
Circ_005408	411.2	250.176	581.601	529.572	219.919	173.85	238.78	74.8604	443.138	176.853	-1.32521	0.00832149	0.0939292	101114291	annot_exons
Circ_005423	0	0	0	0	123.705	120.358	23.878	0	0.001	66.9851	16.0316	0.00617767	0.0746841	101115637	one_exon
Circ_005426	0	0	0	0	27.4899	26.7462	35.817	59.8883	0.001	37.4854	15.194	0.0148705	0.143007	101116161	annot_exons
Circ_005443	0	0	0	0	192.429	120.358	83.5731	119.777	0.001	129.034	16.9774	1.17343e-05	0.000486698	101107374	annot_exons
Circ_005450	0	0	0	0	54.9798	26.7462	23.878	14.9721	0.001	30.144	14.8796	0.0436626	0.300183	101107374	annot_exons
Circ_005456	215.391	68.2299	126.435	167.233	0	40.1193	0	0	144.322	10.0298	-3.84693	0.000131729	0.00346557	101118462	antisense
Circ_005466	39.1619	113.716	75.861	139.361	329.879	454.685	238.78	673.743	92.0252	424.272	2.20489	0.000207433	0.00498804	101118462	annot_exons
Circ_005467	176.229	295.663	328.731	334.467	96.2146	40.1193	47.7561	269.497	283.772	113.397	-1.32335	0.0457556	0.309133	101118462	annot_exons
Circ_005471	19.581	90.9732	151.722	195.106	0	0	0	44.9162	114.345	11.2291	-3.34809	0.00398764	0.053147	101118462	annot_exons
Circ_005494	0	0	0	0	54.9798	0	59.6951	44.9162	0.001	39.8978	15.284	0.0266943	0.214853	101119149	annot_exons
Circ_005497	156.648	113.716	101.148	27.8722	27.4899	13.3731	0	29.9442	99.8461	17.7018	-2.49581	0.00400636	0.0532681	101119149	annot_exons
Circ_005518	39.1619	0	25.287	27.8722	137.449	160.477	71.6341	119.777	23.0803	122.334	2.4061	0.00402713	0.0534902	101122612	annot_exons
Circ_005519	0	0	0	0	13.7449	66.8655	35.817	59.8883	0.001	44.0789	15.4278	0.0117191	0.120418	101122612	annot_exons
Circ_005521	352.457	272.92	227.583	167.233	109.96	173.85	59.6951	104.805	255.048	112.077	-1.18628	0.0177911	0.161553	101122612	annot_exons
Circ_005522	58.7429	22.7433	0	27.8722	54.9798	200.596	35.817	194.637	27.3396	121.508	2.15198	0.0325599	0.246597	101122612	annot_exons
Circ_005546	234.972	272.92	50.574	167.233	41.2348	26.7462	23.878	149.721	181.425	60.395	-1.58687	0.0450782	0.305921	101102827	annot_exons
Circ_005548	58.7429	22.7433	151.722	0	0	0	11.939	0	58.3021	2.98475	-4.28786	0.0109676	0.114444	101102827	annot_exons
Circ_005549	78.3239	90.9732	126.435	111.489	0	0	11.939	44.9162	101.805	14.2138	-2.84045	0.00240488	0.0356996	101102827	annot_exons
Circ_005552	215.391	568.582	328.731	306.595	82.4697	80.2386	131.329	284.469	354.825	144.627	-1.29477	0.0271042	0.217385	101102827	annot_exons
Circ_005558	19.581	45.4866	101.148	167.233	0	26.7462	11.939	0	83.3622	9.6713	-3.10761	0.0137573	0.135665	101102827	annot_exons
Circ_005585	195.81	181.946	101.148	139.361	0	26.7462	11.939	44.9162	154.566	20.9004	-2.88663	0.000157536	0.00401511	101108241	annot_exons
Circ_005601	195.81	113.716	126.435	418.084	123.705	66.8655	47.7561	74.8604	213.511	78.2966	-1.44729	0.0321152	0.24436	101109724	annot_exons
Circ_005612	19.581	45.4866	126.435	55.7445	13.7449	0	0	14.9721	61.8118	7.17926	-3.10598	0.0152799	0.145928	101109724	annot_exons
Circ_005638	0	0	0	0	137.449	66.8655	119.39	119.777	0.001	110.87	16.7585	3.64531e-05	0.0012203	105606459	annot_exons
Circ_005654	0	0	0	0	68.7247	53.4924	107.451	74.8604	0.001	76.1322	16.2162	0.000129252	0.00342668	101115220	annot_exons
Circ_005661	0	0	0	0	137.449	53.4924	71.6341	0	0.001	65.644	16.0024	0.00402269	0.0534582	101115220	annot_exons
Circ_005681	19.581	0	25.287	0	54.9798	133.731	47.7561	29.9442	11.217	66.6027	2.5699	0.0409453	0.288404	101113351	annot_exons
Circ_005682	117.486	68.2299	50.574	27.8722	0	0	0	14.9721	66.0405	3.74302	-4.14108	0.00858313	0.0959383	101113351	annot_exons
Circ_005685	0	0	0	0	54.9798	13.3731	23.878	89.8325	0.001	45.5158	15.4741	0.0153732	0.146355	443507	antisense
Circ_005690	0	45.4866	0	0	151.194	160.477	59.6951	164.693	11.3716	134.015	3.55888	0.000366572	0.00792607	101114630	one_exon
Circ_005694	841.982	659.556	531.027	613.189	192.429	280.835	274.597	59.8883	661.438	201.937	-1.7117	0.000341825	0.0074644	101114630	annot_exons
Circ_005700	137.067	0	0	0	137.449	173.85	143.268	104.805	34.2667	139.843	2.02893	0.0441157	0.302032	101114630	annot_exons
Circ_005712	0	0	0	27.8722	206.174	120.358	95.5121	44.9162	6.96806	116.74	4.0664	0.000554156	0.010991	100125623	annot_exons
Circ_005725	0	0	0	0	123.705	0	71.6341	14.9721	0.001	52.5777	15.6822	0.0176503	0.160797	101115890	exon_intron
Circ_005740	0	0	0	0	13.7449	26.7462	23.878	59.8883	0.001	31.0644	14.923	0.0455874	0.308511	101122965	annot_exons
Circ_005743	0	0	0	0	0	53.4924	47.7561	29.9442	0.001	32.7982	15.0013	0.0414368	0.290553	101102916	one_exon
Circ_005745	137.067	90.9732	25.287	0	11023.4	7288.34	13909	2814.75	63.3317	8758.87	7.11167	2.34617e-15	8.25195e-13	NA	intergenic
Circ_005753	0	0	0	27.8722	151.194	173.85	250.719	119.777	6.96806	173.885	4.64123	2.21363e-06	0.000120897	101122804	exon_intron
Circ_005755	97.9048	136.46	50.574	27.8722	0	13.3731	0	14.9721	78.2027	7.08629	-3.46412	0.00251394	0.0371099	101104166	annot_exons
Circ_005757	58.7429	341.149	50.574	362.339	13.7449	0	71.6341	29.9442	203.201	28.8308	-2.81723	0.00504289	0.063759	101104166	annot_exons
Circ_005772	137.067	90.9732	0	0	219.919	240.716	214.902	179.665	57.01	213.801	1.90698	0.0143872	0.140148	101108848	annot_exons
Circ_005781	78.3239	136.46	75.861	222.978	0	0	59.6951	44.9162	128.406	26.1528	-2.29567	0.0133551	0.132891	101110160	annot_exons
Circ_005793	0	0	0	0	41.2348	13.3731	71.6341	14.9721	0.001	35.3035	15.1075	0.0352415	0.260402	101110690	annot_exons
Circ_005799	0	0	0	0	68.7247	53.4924	35.817	0	0.001	39.5085	15.2699	0.0286162	0.225748	101110953	one_exon
Circ_005815	78.3239	113.716	50.574	0	0	0	0	0	60.6536	0.001	-15.8883	0.00703245	0.0824851	NA	intergenic
Circ_005816	78.3239	90.9732	25.287	83.6167	0	13.3731	23.878	0	69.5502	9.31278	-2.90077	0.0140474	0.137651	NA	intergenic
Circ_005825	156.648	181.946	227.583	222.978	41.2348	40.1193	47.7561	0	197.289	32.2775	-2.61171	3.53681e-05	0.0011885	105601941	annot_exons
Circ_005832	117.486	22.7433	101.148	55.7445	0	0	11.939	0	74.2804	2.98475	-4.6373	0.000805989	0.0147442	101112496	exon_intron
Circ_005839	0	0	0	27.8722	123.705	26.7462	83.5731	179.665	6.96806	103.422	3.89165	0.00187857	0.0294443	101116333	annot_exons
Circ_005874	39.1619	45.4866	25.287	0	82.4697	187.223	143.268	134.749	27.4839	136.927	2.31675	0.00354945	0.048817	101115296	annot_exons
Circ_005875	58.7429	22.7433	0	0	109.96	93.6117	71.6341	89.8325	20.3715	91.2595	2.16342	0.0179829	0.162908	101115296	annot_exons
Circ_005899	0	0	151.722	55.7445	0	0	0	0	51.8666	0.001	-15.6625	0.048003	0.319604	106990105	annot_exons
Circ_005901	352.457	204.69	252.87	139.361	82.4697	53.4924	23.878	74.8604	237.345	58.6751	-2.01616	0.000613237	0.0118945	106990105	annot_exons
Circ_005917	0	0	0	0	27.4899	53.4924	23.878	44.9162	0.001	37.4441	15.1925	0.0147105	0.142181	101119234	annot_exons
Circ_005919	39.1619	0	0	0	178.684	106.985	107.451	284.469	9.79048	169.397	4.11289	6.70518e-05	0.00198069	101119234	annot_exons
Circ_005933	137.067	250.176	151.722	278.722	0	0	0	14.9721	204.422	3.74302	-5.7712	1.3423e-08	1.32616e-06	101119920	annot_exons
Circ_005937	19.581	0	0	0	219.919	53.4924	47.7561	14.9721	4.89524	84.0349	4.10154	0.00596219	0.0725111	101119920	annot_exons
Circ_005953	0	0	0	0	27.4899	26.7462	23.878	44.9162	0.001	30.7576	14.9087	0.0362925	0.266155	101118888	annot_exons
Circ_005954	234.972	45.4866	0	0	934.657	213.97	310.414	1272.63	70.1146	682.917	3.28392	0.00196904	0.0306078	101118888	annot_exons
Circ_005969	0	0	0	0	41.2348	80.2386	23.878	29.9442	0.001	43.8239	15.4194	0.0111741	0.116003	101119150	annot_exons
Circ_005975	0	0	0	0	27.4899	40.1193	0	89.8325	0.001	39.3604	15.2645	0.035122	0.259952	101122123	exon_intron
Circ_005977	430.781	386.636	252.87	501.7	192.429	147.104	202.963	179.665	392.997	180.54	-1.1222	0.00577066	0.070769	101122613	annot_exons
Circ_005987	0	0	0	0	13.7449	80.2386	35.817	89.8325	0.001	54.9083	15.7447	0.00424876	0.0557048	101123394	annot_exons
Circ_005989	509.105	568.582	303.444	1114.89	137.449	53.4924	71.6341	29.9442	624.005	73.13	-3.09302	1.48976e-06	8.59923e-05	101123394	annot_exons
Circ_006005	0	0	101.148	0	219.919	147.104	214.902	149.721	25.287	182.912	2.85468	0.00108579	0.0188807	101102999	antisense
Circ_006006	0	0	0	0	54.9798	26.7462	95.5121	134.749	0.001	77.9967	16.2511	0.000363445	0.00787784	101102999	exon_intron
Circ_006008	0	0	0	0	0	147.104	11.939	29.9442	0.001	47.2468	15.5279	0.0342728	0.255535	101102999	exon_intron
Circ_006009	0	0	0	0	82.4697	80.2386	71.6341	104.805	0.001	84.7867	16.3716	0.000305056	0.00676169	101102999	exon_intron
Circ_006010	0	0	0	0	27.4899	133.731	11.939	29.9442	0.001	50.776	15.6319	0.0121217	0.123555	NA	intergenic
Circ_006016	0	0	0	0	109.96	13.3731	47.7561	14.9721	0.001	46.5152	15.5054	0.0150021	0.143851	101105091	annot_exons
Circ_006050	0	68.2299	101.148	55.7445	0	0	0	0	56.2806	0.001	-15.7804	0.0113367	0.117183	101107978	annot_exons
Circ_006060	117.486	181.946	25.287	139.361	54.9798	13.3731	23.878	44.9162	116.02	34.2868	-1.75865	0.0305156	0.235937	101123224	annot_exons
Circ_006065	469.943	409.379	505.74	418.084	13.7449	26.7462	0	0	450.787	10.1228	-5.47677	1.33768e-16	5.69141e-14	101108935	annot_exons
Circ_006068	509.105	796.015	455.166	111.489	13.7449	40.1193	23.878	29.9442	467.944	26.9216	-4.1195	1.99587e-07	1.49147e-05	101109289	annot_exons
Circ_006070	176.229	45.4866	202.296	195.106	68.7247	66.8655	11.939	29.9442	154.779	44.3683	-1.80261	0.0126761	0.128066	101109289	annot_exons
Circ_006071	195.81	341.149	328.731	195.106	13.7449	13.3731	0	0	265.199	6.77951	-5.28975	1.43996e-09	1.87117e-07	101109289	annot_exons
Circ_006081	39.1619	295.663	75.861	0	0	0	0	44.9162	102.671	11.2291	-3.19273	0.022799	0.192084	101109289	annot_exons
Circ_006082	0	227.433	25.287	55.7445	0	0	0	0	77.1161	0.001	-16.2347	0.00633563	0.0762444	101109289	annot_exons
Circ_006083	39.1619	68.2299	151.722	111.489	0	0	0	0	92.6507	0.001	-16.4995	0.000168412	0.00422294	101109289	annot_exons
Circ_006087	0	22.7433	252.87	195.106	0	13.3731	11.939	0	117.68	6.32803	-4.21697	0.0047843	0.0610901	101109289	annot_exons
Circ_006090	215.391	363.893	404.592	836.167	27.4899	66.8655	83.5731	44.9162	455.011	55.7112	-3.02986	5.70562e-06	0.000265916	101109289	annot_exons
Circ_006097	117.486	22.7433	0	27.8722	123.705	307.581	59.6951	209.609	42.0253	175.147	2.05924	0.0224186	0.189667	101110349	annot_exons
Circ_006109	58.7429	0	25.287	83.6167	0	0	0	0	41.9117	0.001	-15.3551	0.0338504	0.253847	101112408	annot_exons
Circ_006124	195.81	136.46	202.296	250.85	54.9798	13.3731	35.817	89.8325	196.354	48.5006	-2.01738	0.00126397	0.021343	101112915	annot_exons
Circ_006126	58.7429	318.406	278.157	222.978	0	0	0	29.9442	219.571	7.48604	-4.87434	2.62981e-06	0.000138467	101113611	annot_exons
Circ_006127	8693.95	13304.8	12719.4	10786.6	4315.91	2928.71	3796.61	2665.03	11376.2	3426.56	-1.73118	4.66702e-10	6.91637e-08	101113611	annot_exons
Circ_006129	58.7429	204.69	101.148	27.8722	0	13.3731	23.878	14.9721	98.1132	13.0558	-2.90976	0.00896493	0.0989481	101113611	exon_intron
Circ_006136	0	0	0	0	68.7247	173.85	11.939	74.8604	0.001	82.3436	16.3294	0.000717964	0.0134225	NA	intergenic
Circ_006157	176.229	0	101.148	27.8722	494.818	1578.03	1719.22	883.353	76.3122	1168.85	3.93704	1.02085e-06	6.24806e-05	101104416	intronic
Circ_006158	19.581	0	0	0	27.4899	173.85	179.085	149.721	4.89524	132.537	4.75887	0.000394399	0.0083565	101104416	intronic
Circ_006163	0	0	0	0	13.7449	40.1193	47.7561	29.9442	0.001	32.8911	15.0054	0.0257406	0.209507	101104416	annot_exons
Circ_006164	19.581	0	0	0	274.899	66.8655	107.451	164.693	4.89524	153.477	4.9705	7.57403e-05	0.00217879	101104416	annot_exons
Circ_006165	0	0	0	0	13.7449	26.7462	47.7561	89.8325	0.001	44.5199	15.4422	0.0147444	0.142261	101104416	annot_exons
Circ_006170	117.486	159.203	101.148	27.8722	13.7449	0	0	0	101.427	3.43624	-4.88347	6.5273e-05	0.00194119	101121028	annot_exons
Circ_006176	156.648	181.946	0	55.7445	0	0	0	0	98.5846	0.001	-16.5891	0.000716079	0.0134063	101122043	annot_exons
Circ_006178	117.486	45.4866	25.287	167.233	13.7449	13.3731	0	14.9721	88.8732	10.5225	-3.07827	0.00561992	0.0694044	101105675	annot_exons
Circ_006183	19.581	0	0	0	54.9798	66.8655	95.5121	59.8883	4.89524	69.3114	3.82364	0.00730174	0.0850081	101105935	annot_exons
Circ_006195	117.486	477.609	227.583	139.361	151.194	13.3731	83.5731	0	240.51	62.0352	-1.95494	0.0319159	0.243537	101106957	annot_exons
Circ_006196	19.581	227.433	75.861	278.722	0	13.3731	35.817	0	150.399	12.2975	-3.61236	0.00122233	0.0208383	101106957	annot_exons
Circ_006202	0	0	0	0	82.4697	40.1193	59.6951	134.749	0.001	79.2582	16.2743	0.000231666	0.00544662	101107457	annot_exons
Circ_006215	156.648	159.203	126.435	222.978	27.4899	0	11.939	0	166.316	9.85723	-4.0766	7.98868e-07	5.04147e-05	101102161	annot_exons
Circ_006216	58.7429	0	227.583	222.978	0	0	0	0	127.326	0.001	-16.9582	0.000473085	0.00969658	101102161	annot_exons
Circ_006226	176.229	45.4866	75.861	27.8722	0	0	0	29.9442	81.3621	7.48604	-3.44208	0.00354288	0.048752	100653388	annot_exons
Circ_006229	19.581	0	75.861	27.8722	206.174	307.581	274.597	329.386	30.8286	279.435	3.18017	1.90693e-06	0.000106124	NA	intergenic
Circ_006242	0	0	0	0	96.2146	13.3731	95.5121	74.8604	0.001	69.9901	16.0949	0.000993879	0.0176043	101108506	annot_exons
Circ_006267	0	0	0	0	219.919	13.3731	262.658	134.749	0.001	157.675	17.2666	2.64521e-05	0.000930375	NA	intergenic
Circ_006284	58.7429	22.7433	50.574	55.7445	0	0	0	0	46.9512	0.001	-15.5189	0.00844341	0.0947782	101106864	annot_exons
Circ_006286	0	90.9732	177.009	0	0	0	0	0	66.9956	0.001	-16.0318	0.0203533	0.177605	101106864	annot_exons
Circ_006288	39.1619	0	0	0	54.9798	173.85	83.5731	119.777	9.79048	108.045	3.46411	0.00211587	0.0324983	101108328	one_exon
Circ_006294	0	0	0	0	137.449	267.462	59.6951	209.609	0.001	168.554	17.3629	6.60739e-06	0.00030103	NA	intergenic
Circ_006298	0	0	0	0	27.4899	53.4924	11.939	194.637	0.001	71.8896	16.1335	0.0039239	0.0525958	101105349	annot_exons
Circ_006301	0	0	0	0	54.9798	13.3731	35.817	44.9162	0.001	37.2715	15.1858	0.0170108	0.156843	101110528	annot_exons
Circ_006303	0	0	0	0	123.705	147.104	23.878	44.9162	0.001	84.9007	16.3735	0.000334806	0.00733541	101110528	annot_exons
Circ_006327	78.3239	68.2299	25.287	0	0	0	0	0	42.9602	0.001	-15.3907	0.0305269	0.235937	101113426	annot_exons
Circ_006328	97.9048	68.2299	177.009	139.361	41.2348	40.1193	35.817	14.9721	120.626	33.0358	-1.86844	0.0122053	0.12416	101113426	exon_intron
Circ_006334	195.81	181.946	151.722	55.7445	0	0	11.939	14.9721	146.306	6.72777	-4.44271	1.07289e-05	0.000452104	101114040	annot_exons
Circ_006336	293.715	90.9732	227.583	55.7445	27.4899	13.3731	11.939	0	167.004	13.2005	-3.66122	7.30761e-05	0.00211368	101114040	annot_exons
Circ_006343	234.972	227.433	429.879	362.339	137.449	53.4924	131.329	74.8604	313.656	99.2829	-1.65957	0.00134123	0.0224352	101114040	annot_exons
Circ_006345	117.486	90.9732	25.287	111.489	13.7449	26.7462	0	0	86.3087	10.1228	-3.0919	0.00379293	0.051156	101114040	annot_exons
Circ_006365	39.1619	0	75.861	111.489	0	0	0	0	56.628	0.001	-15.7892	0.0123296	0.125286	101108151	annot_exons
Circ_006384	19.581	0	50.574	0	137.449	26.7462	95.5121	74.8604	17.5387	83.642	2.25368	0.0287457	0.226218	101117008	annot_exons
Circ_006387	0	0	0	0	41.2348	93.6117	23.878	14.9721	0.001	43.4242	15.4062	0.015973	0.150327	101117008	annot_exons
Circ_006390	78.3239	113.716	25.287	167.233	439.838	387.82	453.683	419.218	96.1402	425.14	2.14473	1.23815e-05	0.000507949	101117008	annot_exons
Circ_006399	78.3239	45.4866	75.861	83.6167	0	0	0	29.9442	70.822	7.48604	-3.24192	0.00380068	0.0512306	101109728	exon_intron
Circ_006402	0	45.4866	0	27.8722	68.7247	93.6117	131.329	134.749	18.3397	107.104	2.54596	0.00591893	0.0720514	101118373	exon_intron
Circ_006410	0	0	0	0	481.073	454.685	405.927	374.302	0.001	428.997	18.7106	1.97388e-15	7.23181e-13	101119744	annot_exons
Circ_006417	0	0	0	0	96.2146	53.4924	0	44.9162	0.001	48.6558	15.5703	0.0146981	0.142181	101122455	annot_exons
Circ_006424	58.7429	0	126.435	27.8722	398.604	160.477	119.39	134.749	53.2625	203.305	1.93245	0.0162982	0.152458	100125358	annot_exons
Circ_006425	0	68.2299	50.574	0	164.939	187.223	71.6341	269.497	29.701	173.324	2.54489	0.00314486	0.0443627	100125358	annot_exons
Circ_006429	0	0	0	0	54.9798	173.85	107.451	44.9162	0.001	95.2994	16.5402	8.87221e-05	0.00248179	100125358	annot_exons
Circ_006430	0	0	0	0	54.9798	66.8655	11.939	74.8604	0.001	52.1612	15.6707	0.00522514	0.0655102	100125358	annot_exons
Circ_006438	97.9048	45.4866	75.861	27.8722	13.7449	0	11.939	0	61.7812	6.42099	-3.2663	0.0103825	0.109816	101110782	annot_exons
Circ_006449	78.3239	136.46	126.435	306.595	27.4899	0	11.939	74.8604	161.953	28.5723	-2.50289	0.00396931	0.0529622	443141	annot_exons
Circ_006456	0	0	0	0	123.705	120.358	23.878	0	0.001	66.9851	16.0316	0.00617628	0.0746841	101111568	annot_exons
Circ_006459	0	0	0	0	41.2348	13.3731	23.878	89.8325	0.001	42.0796	15.3608	0.0168098	0.155806	101111568	annot_exons
Circ_006465	39.1619	0	0	0	219.919	53.4924	35.817	74.8604	9.79048	96.0222	3.29392	0.01384	0.136191	101111568	annot_exons
Circ_006475	176.229	0	0	55.7445	0	0	0	0	57.9933	0.001	-15.8236	0.0273887	0.218803	101112080	annot_exons
Circ_006490	0	0	0	0	82.4697	13.3731	23.878	14.9721	0.001	33.6732	15.0393	0.0418022	0.291899	101102163	annot_exons
Circ_006497	176.229	113.716	151.722	195.106	13.7449	40.1193	0	29.9442	159.193	20.9521	-2.92561	7.93292e-05	0.00226199	101113089	annot_exons
Circ_006501	0	0	0	0	137.449	66.8655	23.878	0	0.001	57.0482	15.7999	0.0118376	0.121315	101113089	annot_exons
Circ_006507	0	0	0	0	109.96	160.477	23.878	29.9442	0.001	81.0647	16.3068	0.000666493	0.0126576	101103745	annot_exons
Circ_006521	0	0	0	0	54.9798	53.4924	23.878	29.9442	0.001	40.5736	15.3083	0.01472	0.142181	101104515	annot_exons
Circ_006535	137.067	22.7433	0	83.6167	0	0	0	0	60.8567	0.001	-15.8931	0.0113578	0.117316	101114376	annot_exons
Circ_006537	156.648	250.176	75.861	83.6167	0	0	0	14.9721	141.575	3.74302	-5.24122	3.49042e-06	0.000174713	101105429	annot_exons
Circ_006552	0	0	0	0	13.7449	0	59.6951	74.8604	0.001	37.0751	15.1782	0.0404419	0.286711	101115641	annot_exons
Circ_006553	665.753	250.176	404.592	222.978	54.9798	53.4924	23.878	0	385.875	33.0876	-3.54377	1.30453e-06	7.7331e-05	101107883	annot_exons
Circ_006571	0	0	0	0	27.4899	120.358	71.6341	224.581	0.001	111.016	16.7604	0.000100165	0.00274948	NA	intergenic
Circ_006574	0	0	0	0	82.4697	13.3731	23.878	29.9442	0.001	37.4162	15.1914	0.0242705	0.200889	NA	intergenic
Circ_006576	0	0	0	0	2267.92	1404.18	1766.97	628.827	0.001	1516.97	20.5328	8.89036e-18	4.88581e-15	NA	intergenic
Circ_006591	352.457	523.096	632.175	306.595	68.7247	53.4924	23.878	134.749	453.581	70.211	-2.69159	3.75073e-06	0.000184591	101117439	annot_exons
Circ_006592	78.3239	159.203	177.009	83.6167	13.7449	0	35.817	44.9162	124.538	23.6196	-2.39853	0.00369848	0.0503158	101117439	annot_exons
Circ_006593	195.81	363.893	126.435	0	13.7449	13.3731	47.7561	0	171.534	18.7185	-3.19596	0.00534105	0.0665839	101117439	annot_exons
Circ_006602	58.7429	113.716	50.574	55.7445	0	53.4924	11.939	0	69.6945	16.3578	-2.09106	0.0381632	0.275886	100302548	annot_exons
Circ_006616	0	0	0	0	109.96	147.104	0	14.9721	0.001	68.0089	16.0534	0.00651454	0.0778646	101110433	annot_exons
Circ_006617	0	0	0	0	96.2146	13.3731	23.878	59.8883	0.001	48.3385	15.5609	0.0111927	0.116058	101110433	annot_exons
Circ_006626	254.553	136.46	379.305	195.106	27.4899	40.1193	23.878	14.9721	241.356	26.6148	-3.18086	4.82764e-06	0.000231122	101110692	annot_exons
Circ_006633	391.619	113.716	379.305	222.978	13.7449	13.3731	47.7561	0	276.905	18.7185	-3.88685	9.90496e-07	6.1322e-05	443484	annot_exons
Circ_006634	156.648	181.946	202.296	195.106	27.4899	80.2386	35.817	14.9721	183.999	39.6294	-2.21505	0.000448849	0.00926462	443484	exon_intron
Circ_006636	58.7429	90.9732	202.296	195.106	0	53.4924	71.6341	14.9721	136.779	35.0246	-1.96541	0.0180883	0.16352	443484	annot_exons
Circ_006640	0	0	0	0	439.838	240.716	214.902	119.777	0.001	253.808	17.9534	6.91741e-08	5.86734e-06	100505388	annot_exons
Circ_006646	58.7429	113.716	151.722	0	0	13.3731	23.878	0	81.0454	9.31278	-3.12145	0.0198003	0.17428	101112498	annot_exons
Circ_006661	78.3239	45.4866	75.861	83.6167	0	13.3731	23.878	0	70.822	9.31278	-2.92691	0.0106424	0.111936	101113514	annot_exons
Circ_006666	195.81	90.9732	50.574	250.85	68.7247	0	83.5731	29.9442	147.052	45.5605	-1.69047	0.0471499	0.316148	101113778	annot_exons
Circ_006672	411.2	682.299	354.018	167.233	151.194	160.477	95.5121	74.8604	403.688	120.511	-1.74407	0.00206672	0.0318734	101114797	annot_exons
Circ_006680	19.581	90.9732	75.861	55.7445	274.899	254.089	179.085	314.414	60.5399	255.622	2.07805	0.00037978	0.00813167	101115891	one_exon
Circ_006686	626.591	341.149	379.305	306.595	219.919	106.985	167.146	179.665	413.41	168.429	-1.29543	0.00420225	0.0553367	101115891	annot_exons
Circ_006727	0	45.4866	25.287	0	96.2146	53.4924	71.6341	119.777	17.6934	85.2794	2.26899	0.017577	0.160271	101118121	annot_exons
Circ_006729	0	0	0	0	82.4697	26.7462	35.817	89.8325	0.001	58.7163	15.8415	0.00281615	0.0404835	101118121	annot_exons
Circ_006731	0	0	0	0	54.9798	106.985	83.5731	29.9442	0.001	68.8705	16.0716	0.000617695	0.0119459	101118121	annot_exons
Circ_006732	19.581	0	0	0	192.429	267.462	143.268	119.777	4.89524	180.734	5.20634	1.66439e-06	9.48271e-05	101118121	annot_exons
Circ_006733	0	0	0	0	27.4899	120.358	179.085	134.749	0.001	115.42	16.8165	2.50921e-05	0.000890856	101118121	annot_exons
Circ_006736	19.581	0	0	0	151.194	374.447	393.988	389.274	4.89524	327.226	6.06276	2.62133e-09	3.2013e-07	101118121	annot_exons
Circ_006738	274.134	113.716	126.435	222.978	755.972	1430.92	1408.8	1587.04	184.316	1295.68	2.81346	2.88774e-09	3.49429e-07	101118121	annot_exons
Circ_006739	509.105	454.866	354.018	222.978	1347	909.371	1038.69	973.185	385.242	1067.06	1.46981	5.22751e-05	0.00165542	101118121	annot_exons
Circ_006745	0	0	0	0	82.4697	93.6117	143.268	134.749	0.001	113.525	16.7926	3.24988e-05	0.00111191	101119236	one_exon
Circ_006746	0	0	0	0	96.2146	40.1193	95.5121	269.497	0.001	125.336	16.9354	3.34306e-05	0.00113496	443027	intronic
Circ_006754	39.1619	250.176	126.435	222.978	27.4899	0	0	0	159.688	6.87247	-4.53828	5.49639e-05	0.0017134	101120935	antisense
Circ_006760	0	0	0	0	0	93.6117	23.878	59.8883	0.001	44.3445	15.4365	0.0253826	0.207746	101121697	annot_exons
Circ_006764	0	0	0	0	27.4899	80.2386	179.085	119.777	0.001	101.648	16.6332	7.14219e-05	0.00208181	101121697	annot_exons
Circ_006774	0	0	0	0	109.96	93.6117	262.658	149.721	0.001	153.988	17.2325	4.99592e-06	0.000237455	101123318	annot_exons
Circ_006776	39.1619	0	0	0	164.939	80.2386	95.5121	59.8883	9.79048	100.145	3.35456	0.00320439	0.0448866	101123318	annot_exons
Circ_006779	0	0	0	0	109.96	26.7462	0	29.9442	0.001	41.6625	15.3465	0.0313597	0.240348	101123318	annot_exons
Circ_006783	0	0	0	0	82.4697	0	71.6341	59.8883	0.001	53.498	15.7072	0.00859691	0.0960155	101123318	annot_exons
Circ_006785	0	0	0	0	54.9798	40.1193	47.7561	74.8604	0.001	54.4289	15.7321	0.00177389	0.0281718	101123318	annot_exons
Circ_006793	0	0	0	0	82.4697	53.4924	23.878	0	0.001	39.96	15.2863	0.0342221	0.255229	101123318	annot_exons
Circ_006797	0	0	25.287	0	109.96	187.223	47.7561	119.777	6.32175	116.179	4.19988	0.000383966	0.00818807	101123318	annot_exons
Circ_006810	0	0	0	0	13.7449	53.4924	47.7561	29.9442	0.001	36.2344	15.1451	0.0260439	0.211385	101102003	annot_exons
Circ_006813	39.1619	0	50.574	55.7445	96.2146	120.358	107.451	209.609	36.3701	133.408	1.87502	0.0171054	0.157385	101102003	annot_exons
Circ_006828	78.3239	159.203	202.296	111.489	0	13.3731	11.939	29.9442	137.828	13.8141	-3.31866	7.71773e-05	0.0022153	101107038	annot_exons
Circ_006834	0	0	0	0	82.4697	26.7462	59.6951	29.9442	0.001	49.7138	15.6014	0.0044849	0.0579652	101107038	one_exon
Circ_006836	117.486	45.4866	75.861	83.6167	0	0	0	0	80.6125	0.001	-16.2987	0.000263613	0.00602066	101107038	annot_exons
Circ_006838	19.581	90.9732	25.287	55.7445	0	13.3731	11.939	0	47.8964	6.32803	-2.92009	0.0440159	0.301505	101107038	annot_exons
Circ_006839	195.81	955.218	328.731	613.189	68.7247	40.1193	23.878	14.9721	523.237	36.9235	-3.82485	3.87587e-07	2.66949e-05	101107038	annot_exons
Circ_006851	39.1619	432.123	25.287	83.6167	0	0	0	0	145.047	0.001	-17.1462	0.000237305	0.00554503	101111987	annot_exons
Circ_006876	137.067	136.46	101.148	334.467	0	0	23.878	0	177.285	5.96951	-4.89232	5.76311e-06	0.000266465	101112998	annot_exons
Circ_006879	1977.68	2137.87	2174.68	1254.25	426.093	254.089	274.597	254.525	1886.12	302.326	-2.64124	3.70529e-13	8.64972e-11	101112998	annot_exons
Circ_006885	0	227.433	151.722	83.6167	0	0	11.939	0	115.693	2.98475	-5.27654	0.000425533	0.0088578	101113871	annot_exons
Circ_006916	78.3239	45.4866	177.009	0	261.154	227.343	310.414	119.777	75.2049	229.672	1.61068	0.0263247	0.212928	100188914	annot_exons
Circ_006947	0	0	0	27.8722	96.2146	147.104	107.451	29.9442	6.96806	95.1785	3.77181	0.00193754	0.0302787	101106449	annot_exons
Circ_006964	0	0	0	0	13.7449	213.97	23.878	44.9162	0.001	74.1272	16.1777	0.00352347	0.0485355	101119924	intronic
Circ_006969	0	0	0	0	13.7449	106.985	95.5121	14.9721	0.001	57.8035	15.8189	0.00705197	0.0826773	101121444	antisense
Circ_006970	0	0	0	0	82.4697	307.581	370.109	119.777	0.001	219.984	17.747	2.18537e-06	0.000119601	101121444	intronic
Circ_006975	254.553	136.46	75.861	83.6167	54.9798	0	11.939	14.9721	137.623	20.4727	-2.74894	0.00187505	0.0294067	101122456	annot_exons
Circ_006991	0	0	0	0	13.7449	40.1193	23.878	74.8604	0.001	38.1507	15.2194	0.0213735	0.183799	NA	intergenic
Circ_007011	39.1619	0	0	0	206.174	133.731	95.5121	74.8604	9.79048	127.569	3.70376	0.000614892	0.0119091	101120683	annot_exons
Circ_007013	39.1619	22.7433	101.148	83.6167	0	0	0	14.9721	61.6675	3.74302	-4.04224	0.0147271	0.142199	101107460	annot_exons
Circ_007014	411.2	523.096	126.435	501.7	68.7247	0	23.878	104.805	390.608	49.3518	-2.98455	8.26539e-05	0.00234444	101121957	annot_exons
Circ_007016	195.81	409.379	227.583	557.445	0	13.3731	0	29.9442	347.554	10.8293	-5.00422	1.04083e-08	1.06986e-06	101121957	annot_exons
Circ_007017	802.82	864.245	708.036	1031.27	68.7247	93.6117	83.5731	299.442	851.593	136.338	-2.64298	6.19476e-07	4.01503e-05	101121957	annot_exons
Circ_007039	0	0	0	0	27.4899	66.8655	47.7561	14.9721	0.001	39.2709	15.2612	0.0183954	0.165446	105611329	annot_exons
Circ_007043	0	0	25.287	0	41.2348	93.6117	191.024	119.777	6.32175	111.412	4.13943	0.000688224	0.0129564	101109200	exon_intron
Circ_007049	0	0	0	0	109.96	13.3731	35.817	14.9721	0.001	43.5305	15.4097	0.0223502	0.189574	101110436	annot_exons
Circ_007054	97.9048	45.4866	151.722	0	0	0	0	0	73.7784	0.001	-16.1709	0.00330709	0.0460843	101111476	annot_exons
Circ_007066	176.229	90.9732	202.296	0	13.7449	26.7462	0	29.9442	117.374	17.6088	-2.73675	0.0143465	0.139925	101113427	annot_exons
Circ_007067	78.3239	90.9732	227.583	27.8722	0	0	47.7561	14.9721	106.188	15.682	-2.75944	0.00917598	0.100646	101113427	annot_exons
Circ_007073	19.581	0	75.861	0	151.194	120.358	95.5121	179.665	23.8605	136.682	2.51813	0.00349556	0.0482519	101116076	annot_exons
Circ_007074	137.067	0	75.861	0	494.818	374.447	238.78	314.414	53.2319	355.615	2.73995	0.000584779	0.0114484	101116076	annot_exons
Circ_007083	411.2	386.636	0	306.595	96.2146	53.4924	11.939	44.9162	276.108	51.6406	-2.41865	0.0117457	0.12056	NA	intergenic
Circ_007089	0	0	0	0	0	26.7462	119.39	29.9442	0.001	44.0201	15.4259	0.0307894	0.237206	101119840	annot_exons
Circ_007092	39.1619	113.716	50.574	0	0	0	11.939	14.9721	50.8631	6.72777	-2.91842	0.0469334	0.315348	101119840	annot_exons
Circ_007106	0	0	0	0	82.4697	40.1193	95.5121	14.9721	0.001	58.2683	15.8304	0.00265118	0.038818	101120512	annot_exons
Circ_007108	0	0	0	0	41.2348	147.104	23.878	44.9162	0.001	64.2833	15.9722	0.00237476	0.0354321	101120512	annot_exons
Circ_007130	0	0	0	0	27.4899	40.1193	95.5121	44.9162	0.001	52.0094	15.6665	0.00440664	0.0572624	101102328	annot_exons
Circ_007131	0	0	0	0	82.4697	53.4924	47.7561	89.8325	0.001	68.3877	16.0614	0.000389304	0.00827514	101102328	annot_exons
Circ_007143	0	0	0	0	13.7449	0	119.39	149.721	0.001	70.714	16.1097	0.00675547	0.0801271	101122125	annot_exons
Circ_007156	372.038	409.379	101.148	473.828	41.2348	40.1193	95.5121	29.9442	339.098	51.7026	-2.7134	9.27989e-05	0.0025795	101104081	annot_exons
Circ_007180	0	0	0	0	27.4899	53.4924	95.5121	59.8883	0.001	59.0957	15.8508	0.00156907	0.025427	101104596	annot_exons
Circ_007188	0	0	0	0	41.2348	66.8655	0	44.9162	0.001	38.2541	15.2233	0.0281787	0.223489	101107376	annot_exons
Circ_007190	0	0	0	0	27.4899	40.1193	47.7561	89.8325	0.001	51.2994	15.6467	0.0041304	0.0545384	101107376	annot_exons
Circ_007204	1331.51	1910.44	1770.09	1505.1	357.369	869.251	585.012	538.995	1629.28	587.657	-1.47119	3.30997e-05	0.00112954	101110165	annot_exons
Circ_007225	0	0	0	0	54.9798	13.3731	11.939	59.8883	0.001	35.0451	15.0969	0.0368998	0.269308	101115146	annot_exons
Circ_007251	19.581	136.46	101.148	27.8722	0	0	0	0	71.2653	0.001	-16.1209	0.00254778	0.0375463	101120005	annot_exons
Circ_007263	19.581	68.2299	101.148	27.8722	0	0	0	0	54.2078	0.001	-15.7262	0.00878541	0.097415	101116670	annot_exons
Circ_007271	0	0	0	0	54.9798	80.2386	107.451	29.9442	0.001	68.1534	16.0565	0.000618985	0.0119621	101116928	exon_intron
Circ_007272	372.038	90.9732	75.861	27.8722	632.268	548.297	310.414	284.469	141.686	443.862	1.64741	0.0244399	0.201784	101116928	annot_exons
Circ_007274	0	0	0	0	68.7247	26.7462	23.878	29.9442	0.001	37.3233	15.1878	0.0173488	0.158969	101116928	annot_exons
Circ_007275	0	0	0	0	54.9798	53.4924	0	44.9162	0.001	38.3471	15.2268	0.0267668	0.21516	101116928	antisense
Circ_007276	0	0	0	0	54.9798	40.1193	0	104.805	0.001	49.9759	15.6089	0.0156005	0.147712	101116928	one_exon
Circ_007289	78.3239	204.69	101.148	557.445	13.7449	93.6117	35.817	59.8883	235.402	50.7655	-2.2132	0.0102386	0.108729	101119239	annot_exons
Circ_007302	0	0	0	0	96.2146	66.8655	59.6951	44.9162	0.001	66.9229	16.0302	0.00040653	0.00858595	NA	intergenic
Circ_007323	58.7429	22.7433	25.287	55.7445	0	0	11.939	0	40.6294	2.98475	-3.76684	0.014439	0.140342	101114132	annot_exons
Circ_007325	19.581	22.7433	75.861	195.106	0	0	0	0	78.3227	0.001	-16.2571	0.00296505	0.0422555	101114132	intronic
Circ_007326	39.1619	136.46	25.287	83.6167	0	0	0	14.9721	71.1314	3.74302	-4.24821	0.0080557	0.0917322	101114381	intronic
Circ_007335	195.81	272.92	75.861	55.7445	41.2348	26.7462	0	44.9162	150.084	28.2243	-2.41076	0.00518582	0.0651723	101115151	antisense
Circ_007337	0	113.716	0	306.595	0	0	0	0	105.078	0.001	-16.6811	0.00513812	0.0647579	101115646	antisense
Circ_007343	137.067	0	25.287	27.8722	0	0	0	0	47.5565	0.001	-15.5374	0.026268	0.212707	101116167	intronic
Circ_007350	0	0	0	0	27.4899	26.7462	47.7561	29.9442	0.001	32.9841	15.0095	0.0222939	0.189219	101115392	annot_exons
Circ_007384	0	0	0	0	219.919	80.2386	131.329	59.8883	0.001	122.844	16.9065	8.71188e-05	0.00244304	101119328	one_exon
Circ_007385	0	0	0	0	123.705	0	23.878	89.8325	0.001	59.3538	15.8571	0.00852469	0.0954064	101119328	one_exon
Circ_007389	0	0	0	0	0	26.7462	71.6341	59.8883	0.001	39.5671	15.272	0.0317029	0.242248	101119925	annot_exons
Circ_007391	234.972	500.353	126.435	306.595	82.4697	26.7462	95.5121	149.721	292.088	88.6122	-1.72083	0.00776437	0.089128	101120431	annot_exons
Circ_007397	156.648	0	0	0	27.4899	2286.8	23.878	14.9721	39.1619	588.285	3.90899	0.0338636	0.253847	101120431	intronic
Circ_007402	0	0	0	0	109.96	13.3731	23.878	29.9442	0.001	44.2887	15.4347	0.0200418	0.175583	101120431	antisense
Circ_007408	0	0	0	0	192.429	200.596	167.146	179.665	0.001	184.959	17.4968	1.83748e-08	1.74985e-06	101120685	annot_exons
Circ_007411	0	0	0	0	27.4899	40.1193	11.939	44.9162	0.001	31.1161	14.9254	0.0416815	0.291649	101120516	annot_exons
Circ_007447	39.1619	22.7433	25.287	55.7445	0	0	0	0	35.7342	0.001	-15.125	0.0231357	0.194053	101101912	exon_intron
Circ_007452	0	22.7433	0	0	82.4697	80.2386	47.7561	29.9442	5.68582	60.1021	3.40197	0.0221385	0.188506	101102412	annot_exons
Circ_007455	0	0	0	0	0	80.2386	95.5121	59.8883	0.001	58.9098	15.8462	0.00461146	0.0594554	101102412	annot_exons
Circ_007461	0	0	25.287	0	137.449	334.327	107.451	119.777	6.32175	174.751	4.78883	2.16704e-05	0.000792278	101123576	exon_intron
Circ_007484	1233.6	1478.31	1744.8	836.167	563.543	387.82	453.683	359.33	1323.22	441.094	-1.5849	1.30184e-05	0.000529139	101105771	annot_exons
Circ_007485	195.81	250.176	126.435	418.084	82.4697	40.1193	47.7561	119.777	247.626	72.5304	-1.77151	0.00392892	0.0526364	101105771	annot_exons
Circ_007492	1918.93	2456.28	1770.09	1867.44	233.664	561.67	596.951	538.995	2003.19	482.82	-2.05274	1.76906e-08	1.69694e-06	101106278	exon_intron
Circ_007494	0	45.4866	0	0	192.429	53.4924	298.475	209.609	11.3716	188.502	4.05106	0.000118076	0.00317829	105612768	one_exon
Circ_007503	39.1619	45.4866	101.148	0	0	0	0	0	46.4491	0.001	-15.5034	0.0221733	0.188559	101109294	annot_exons
Circ_007510	313.295	477.609	278.157	195.106	27.4899	66.8655	83.5731	44.9162	316.042	55.7112	-2.50408	1.12321e-05	0.000470302	101114803	annot_exons
Circ_007516	117.486	45.4866	101.148	0	13.7449	0	0	0	66.0301	3.43624	-4.26422	0.0204588	0.178231	101110080	exon_intron
Circ_007528	332.876	250.176	101.148	362.339	0	66.8655	95.5121	89.8325	261.635	63.0525	-2.05293	0.00379321	0.051156	101110353	annot_exons
Circ_007533	0	22.7433	25.287	0	82.4697	66.8655	119.39	59.8883	12.0076	82.1534	2.77438	0.00654334	0.0781026	101110353	annot_exons
Circ_007546	19.581	22.7433	50.574	0	233.664	160.477	226.841	119.777	23.2246	185.19	2.99528	7.18426e-05	0.00209176	101110353	annot_exons
Circ_007547	0	0	0	0	302.389	93.6117	155.207	104.805	0.001	164.003	17.3234	6.17128e-06	0.000283117	101110353	annot_exons
Circ_007565	39.1619	136.46	50.574	139.361	41.2348	13.3731	11.939	0	91.3892	16.6367	-2.45765	0.0118266	0.121296	NA	intergenic
Circ_007582	137.067	22.7433	75.861	27.8722	0	0	0	0	65.8858	0.001	-16.0077	0.00318492	0.0446889	101117611	annot_exons
Circ_007584	97.9048	90.9732	202.296	111.489	0	0	47.7561	0	125.666	11.939	-3.39584	0.000386978	0.00823234	101114129	one_exon
Circ_007604	352.457	432.123	227.583	641.061	261.154	267.462	119.39	134.749	413.306	195.689	-1.07865	0.0366719	0.268192	100125353	annot_exons
Circ_007610	78.3239	68.2299	75.861	55.7445	0	40.1193	23.878	0	69.5398	15.9993	-2.11983	0.0260986	0.211676	101118378	antisense
Circ_007614	0	0	0	0	13.7449	120.358	59.6951	29.9442	0.001	55.9355	15.7715	0.00550947	0.0681681	101115816	annot_exons
Circ_007615	0	0	0	0	54.9798	147.104	23.878	0	0.001	56.4905	15.7857	0.012938	0.130016	101115816	annot_exons
Circ_007622	0	0	0	0	68.7247	13.3731	107.451	134.749	0.001	81.0744	16.307	0.000428729	0.00891208	101116336	exon_intron
Circ_007630	881.144	1751.23	1340.21	724.678	274.899	254.089	191.024	239.553	1174.32	239.891	-2.29137	1.39271e-07	1.06488e-05	101119154	annot_exons
Circ_007632	0	0	25.287	0	68.7247	26.7462	143.268	119.777	6.32175	89.6289	3.82557	0.00331149	0.0461213	101119495	intronic
Circ_007633	0	0	25.287	0	192.429	26.7462	155.207	134.749	6.32175	127.283	4.33157	0.000559216	0.0110748	101119495	intronic
Circ_007634	0	22.7433	0	0	178.684	120.358	167.146	44.9162	5.68582	127.776	4.49011	0.000177781	0.00439933	101119495	annot_exons
Circ_007643	0	90.9732	50.574	27.8722	0	0	0	0	42.3549	0.001	-15.3702	0.0355439	0.261921	101122209	annot_exons
Circ_007683	0	0	0	27.8722	41.2348	213.97	131.329	29.9442	6.96806	104.119	3.90134	0.00377032	0.0509776	NA	intergenic
Circ_007699	0	0	0	0	137.449	80.2386	143.268	59.8883	0.001	105.211	16.6829	0.000123411	0.00330503	101113262	annot_exons
Circ_007704	0	0	0	0	82.4697	40.1193	35.817	59.8883	0.001	54.5736	15.7359	0.00212491	0.03257	101113262	annot_exons
Circ_007708	0	0	0	0	41.2348	13.3731	35.817	89.8325	0.001	45.0644	15.4597	0.0138086	0.136069	101113262	annot_exons
Circ_007710	0	0	0	0	13.7449	26.7462	11.939	89.8325	0.001	35.5657	15.1182	0.0449178	0.305383	101113262	annot_exons
Circ_007715	0	0	0	0	68.7247	0	47.7561	119.777	0.001	59.0644	15.85	0.00578634	0.0708625	101115644	one_exon
Circ_007724	528.686	409.379	126.435	473.828	233.664	93.6117	95.5121	179.665	384.582	150.613	-1.35244	0.0212697	0.183178	101117607	annot_exons
Circ_007738	0	0	0	0	27.4899	133.731	11.939	0	0.001	43.29	15.4017	0.0437744	0.30071	101112156	annot_exons
Circ_007748	39.1619	0	0	0	398.604	213.97	453.683	329.386	9.79048	348.91	5.15533	1.14537e-09	1.54942e-07	101112156	annot_exons
Circ_007750	0	0	0	0	82.4697	13.3731	95.5121	0	0.001	47.8387	15.5459	0.0233111	0.195214	101112156	exon_intron
Circ_007752	0	0	0	0	41.2348	26.7462	95.5121	29.9442	0.001	48.3593	15.5615	0.00783076	0.089773	101112156	annot_exons
Circ_007760	0	0	0	0	41.2348	80.2386	0	29.9442	0.001	37.8544	15.2082	0.0326914	0.247279	101112156	annot_exons
Circ_007791	0	0	0	0	151.194	40.1193	47.7561	74.8604	0.001	78.4825	16.2601	0.000349434	0.00759285	101104927	antisense
Circ_007804	39.1619	0	0	0	247.409	0	23.878	119.777	9.79048	97.7659	3.31988	0.0265121	0.213741	101115477	annot_exons
Circ_007816	0	0	0	0	123.705	53.4924	119.39	0	0.001	74.1468	16.1781	0.00190578	0.0298353	101115477	annot_exons
Circ_007825	0	0	0	0	13.7449	13.3731	71.6341	104.805	0.001	50.8892	15.6351	0.0104841	0.110625	101115477	annot_exons
Circ_007826	0	0	0	0	27.4899	80.2386	107.451	89.8325	0.001	76.253	16.2185	0.0002291	0.00540552	101115477	annot_exons
Circ_007827	0	0	0	0	137.449	53.4924	71.6341	59.8883	0.001	80.6161	16.2988	0.000130351	0.00344541	101115477	annot_exons
Circ_007832	0	22.7433	50.574	0	137.449	187.223	95.5121	224.581	18.3293	161.192	3.13655	0.000307865	0.00680735	101115477	annot_exons
Circ_007833	0	0	0	0	68.7247	13.3731	35.817	29.9442	0.001	36.9648	15.1739	0.019603	0.173457	101115477	annot_exons
Circ_007855	0	0	0	0	13.7449	66.8655	107.451	0	0.001	47.0154	15.5208	0.0237899	0.197788	101117011	annot_exons
Circ_007892	0	0	0	0	206.174	80.2386	95.5121	224.581	0.001	151.627	17.2102	8.64774e-06	0.000378935	NA	intergenic
Circ_007894	0	0	0	0	82.4697	0	155.207	988.157	0.001	306.458	18.2253	0.000145019	0.00373945	101123657	exon_intron
Circ_007896	58.7429	0	0	0	137.449	133.731	23.878	59.8883	14.6857	88.7367	2.59512	0.0396885	0.283187	NA	intergenic
Circ_007938	0	0	0	0	13.7449	26.7462	47.7561	89.8325	0.001	44.5199	15.4422	0.0147428	0.142261	101109732	one_exon
Circ_007952	0	0	0	0	934.657	748.893	358.17	464.134	0.001	626.464	19.2569	6.61885e-14	1.79999e-11	101111312	exon_intron
Circ_007953	0	0	0	0	591.033	588.416	764.097	943.241	0.001	721.697	19.461	9.85353e-19	6.18872e-16	101111312	annot_exons
Circ_007955	0	0	0	0	27.4899	40.1193	59.6951	14.9721	0.001	35.5691	15.1183	0.0266613	0.214813	101111312	annot_exons
Circ_007956	0	0	0	0	27.4899	53.4924	23.878	14.9721	0.001	29.9581	14.8707	0.043052	0.297491	101111312	annot_exons
Circ_007957	0	0	0	0	0	40.1193	59.6951	44.9162	0.001	36.1826	15.143	0.0386241	0.278074	101111312	annot_exons
Circ_007959	0	0	0	0	82.4697	120.358	71.6341	104.805	0.001	94.8165	16.5329	0.000146868	0.00377973	101111312	annot_exons
Circ_007962	0	0	0	0	68.7247	0	71.6341	74.8604	0.001	53.8048	15.7154	0.00832543	0.0939334	101112922	annot_exons
Circ_007979	0	0	0	0	54.9798	80.2386	59.6951	14.9721	0.001	52.4714	15.6792	0.00452316	0.0584312	101117444	antisense
Circ_007981	0	0	0	0	481.073	641.909	501.439	434.19	0.001	514.653	18.9732	1.4271e-16	5.97546e-14	101117444	one_exon
Circ_007982	0	0	0	0	453.583	641.909	537.256	479.106	0.001	527.964	19.0101	3.6805e-17	1.76523e-14	101117444	one_exon
Circ_007990	0	0	0	0	27.4899	80.2386	119.39	59.8883	0.001	71.7517	16.1307	0.000465139	0.009556	101118295	annot_exons
Circ_007991	39.1619	0	0	0	82.4697	147.104	95.5121	209.609	9.79048	133.674	3.77119	0.000334773	0.00733541	101118295	annot_exons
Circ_007994	156.648	22.7433	25.287	111.489	0	0	11.939	0	79.0417	2.98475	-4.72693	0.00121822	0.0207861	101120009	annot_exons
Circ_008000	0	0	0	0	41.2348	26.7462	35.817	14.9721	0.001	29.6925	14.8578	0.0388481	0.279002	101122300	one_exon
Circ_008006	97.9048	136.46	126.435	111.489	13.7449	13.3731	35.817	0	118.072	15.7338	-2.90773	0.000503271	0.010209	101103343	annot_exons
Circ_008009	254.553	90.9732	328.731	167.233	0	40.1193	71.6341	0	210.373	27.9383	-2.91263	0.000657799	0.0125376	101123065	annot_exons
Circ_008026	0	0	0	0	233.664	80.2386	47.7561	14.9721	0.001	94.1577	16.5228	0.000593812	0.0116031	101108413	antisense
Circ_008032	0	0	0	0	41.2348	93.6117	35.817	119.777	0.001	72.61	16.1479	0.000499097	0.010143	101108075	antisense
Circ_008042	234.972	45.4866	177.009	195.106	0	26.7462	0	44.9162	163.143	17.9156	-3.18685	0.000788841	0.0145212	101114047	annot_exons
Circ_008050	0	0	0	0	68.7247	93.6117	11.939	44.9162	0.001	54.7979	15.7418	0.00420927	0.0553797	100135687	annot_exons
Circ_008059	0	0	0	0	13.7449	0	95.5121	59.8883	0.001	42.2863	15.3679	0.0320066	0.243947	101117354	exon_intron
Circ_008063	97.9048	22.7433	0	27.8722	247.409	361.074	358.17	209.609	37.1301	294.066	2.98548	2.83016e-05	0.00098362	101117867	annot_exons
Circ_008066	0	0	0	0	0	66.8655	23.878	59.8883	0.001	37.658	15.2007	0.0328823	0.248392	101117867	annot_exons
Circ_008074	0	0	0	0	0	0	95.5121	89.8325	0.001	46.3361	15.4999	0.0401899	0.285529	101102668	annot_exons
Circ_008076	234.972	386.636	733.323	501.7	109.96	160.477	202.963	164.693	464.158	159.523	-1.54085	0.00243953	0.0361531	101102925	intronic
Circ_008080	0	0	0	0	27.4899	40.1193	35.817	29.9442	0.001	33.3426	15.0251	0.0209156	0.181168	101121540	annot_exons
Circ_008100	0	90.9732	101.148	27.8722	0	0	0	0	54.9984	0.001	-15.7471	0.0145004	0.140783	101110084	antisense
Circ_008103	0	0	0	0	109.96	66.8655	11.939	104.805	0.001	73.3922	16.1633	0.000856467	0.0154745	101110614	annot_exons
Circ_008104	0	0	0	0	68.7247	26.7462	23.878	29.9442	0.001	37.3233	15.1878	0.0173499	0.158969	101110614	annot_exons
Circ_008105	58.7429	113.716	25.287	27.8722	192.429	120.358	131.329	269.497	56.4047	178.403	1.66126	0.0206104	0.179255	101110614	annot_exons
Circ_008107	0	0	0	0	41.2348	93.6117	47.7561	14.9721	0.001	49.3937	15.592	0.00834312	0.0939652	101105594	intronic
Circ_008118	0	0	0	0	68.7247	53.4924	143.268	29.9442	0.001	73.8574	16.1725	0.000572136	0.0112714	101109637	annot_exons
Circ_008123	0	0	0	0	164.939	120.358	131.329	29.9442	0.001	111.643	16.7685	2.39087e-05	0.000859905	101119845	antisense
Circ_008126	0	0	0	0	54.9798	13.3731	47.7561	29.9442	0.001	36.5133	15.1561	0.0264129	0.213195	101119845	one_exon
Circ_008128	0	0	0	0	151.194	13.3731	35.817	14.9721	0.001	53.8392	15.7164	0.0142784	0.139552	105601951	antisense
Circ_008131	137.067	136.46	278.157	111.489	536.053	213.97	453.683	374.302	165.793	394.502	1.25065	0.0150332	0.144047	101110082	annot_exons
Circ_008133	0	0	0	0	137.449	280.835	71.6341	209.609	0.001	174.882	17.416	3.66805e-06	0.000181198	105613494	exon_intron
Circ_008139	0	0	0	0	467.328	548.297	453.683	374.302	0.001	460.902	18.8141	1.38075e-15	5.20327e-13	101114548	annot_exons
Circ_008147	0	0	0	0	481.073	280.835	393.988	209.609	0.001	341.376	18.381	5.5185e-11	9.39178e-09	NA	intergenic
Circ_008155	97.9048	181.946	25.287	27.8722	0	0	0	0	83.2526	0.001	-16.3452	0.00093216	0.0166257	101107891	antisense
Circ_008156	450.362	45.4866	50.574	27.8722	41.2348	0	0	0	143.574	10.3087	-3.79986	0.00585912	0.0714883	101107891	exon_intron
Circ_008159	39.1619	113.716	278.157	55.7445	0	0	0	0	121.695	0.001	-16.8929	9.69725e-05	0.00267857	101117099	antisense
Circ_008166	0	0	0	0	54.9798	26.7462	11.939	59.8883	0.001	38.3883	15.2284	0.0201251	0.175972	105601907	exon_intron
Circ_008172	0	0	0	0	13.7449	26.7462	95.5121	29.9442	0.001	41.4869	15.3404	0.0179394	0.162676	101120774	one_exon
Circ_008177	0	363.893	151.722	0	0	0	0	0	128.904	0.001	-16.9759	0.00305118	0.0432959	101123578	antisense
Circ_008193	254.553	0	101.148	0	0	0	23.878	0	88.9252	5.96951	-3.89691	0.0227009	0.191502	105602020	intronic
Circ_008199	39.1619	0	0	27.8722	178.684	53.4924	143.268	104.805	16.7585	120.062	2.84082	0.00191709	0.0299947	105602020	annot_exons
Circ_008222	58.7429	90.9732	101.148	111.489	0	40.1193	47.7561	0	90.5883	21.9688	-2.04387	0.0340642	0.254555	101114806	annot_exons
Circ_008230	0	0	0	0	123.705	80.2386	11.939	14.9721	0.001	57.7136	15.8166	0.00827757	0.0934735	101118215	annot_exons
Circ_008245	0	0	0	0	27.4899	106.985	131.329	29.9442	0.001	73.937	16.174	0.000849938	0.0153776	101118215	annot_exons
Circ_008256	0	0	0	0	0	106.985	47.7561	14.9721	0.001	42.4282	15.3727	0.0326535	0.247141	101118215	annot_exons
Circ_008290	39.1619	68.2299	25.287	83.6167	0	26.7462	0	14.9721	54.0739	10.4296	-2.37425	0.0469133	0.315293	101121117	one_exon
Circ_008308	19.581	136.46	151.722	83.6167	0	0	11.939	0	97.8449	2.98475	-5.03481	0.000166489	0.00419868	101102510	annot_exons
Circ_008331	176.229	68.2299	0	27.8722	0	0	0	0	68.0827	0.001	-16.055	0.00677371	0.0802351	101104337	annot_exons
Circ_008332	293.715	22.7433	25.287	111.489	0	13.3731	0	29.9442	113.308	10.8293	-3.38724	0.00612341	0.07413	101104337	annot_exons
Circ_008337	58.7429	22.7433	0	83.6167	0	0	0	0	41.2757	0.001	-15.333	0.0340182	0.254479	101105597	annot_exons
Circ_008339	78.3239	0	75.861	111.489	13.7449	0	0	0	66.4185	3.43624	-4.27268	0.0193918	0.172618	101104601	annot_exons
Circ_008345	19.581	45.4866	227.583	139.361	0	0	11.939	0	108.003	2.98475	-5.17731	0.000289843	0.00651812	101105847	annot_exons
Circ_008355	254.553	113.716	25.287	195.106	0	13.3731	11.939	59.8883	147.165	21.3001	-2.78851	0.00363461	0.049626	101106358	annot_exons
Circ_008391	0	0	0	0	41.2348	40.1193	35.817	74.8604	0.001	48.0079	15.551	0.00529195	0.0660654	101109209	annot_exons
Circ_008392	0	0	0	27.8722	109.96	106.985	59.6951	74.8604	6.96806	87.875	3.65662	0.00163153	0.0262267	101109209	annot_exons
Circ_008401	0	0	0	0	13.7449	80.2386	107.451	59.8883	0.001	65.3307	15.9955	0.00160004	0.0258308	NA	intergenic
Circ_008410	0	0	0	0	137.449	173.85	585.012	314.414	0.001	302.681	18.2074	9.24002e-08	7.47676e-06	101115479	annot_exons
Circ_008417	0	113.716	126.435	83.6167	0	0	0	0	80.9421	0.001	-16.3046	0.00204946	0.031634	101115479	intronic
Circ_008423	0	0	50.574	27.8722	123.705	147.104	59.6951	149.721	19.6116	120.056	2.61393	0.00447088	0.0578124	NA	intergenic
Circ_008424	39.1619	0	0	0	54.9798	40.1193	71.6341	89.8325	9.79048	64.1414	2.7118	0.0343708	0.255976	NA	intergenic
Circ_008427	58.7429	22.7433	0	27.8722	975.891	1056.47	680.524	389.274	27.3396	775.541	4.82614	3.93011e-11	6.82055e-09	NA	intergenic
Circ_008457	58.7429	22.7433	50.574	27.8722	0	0	11.939	0	39.9831	2.98475	-3.74371	0.0139062	0.136623	101123231	annot_exons
Circ_008476	78.3239	68.2299	101.148	55.7445	0	13.3731	0	0	75.8616	3.34327	-4.50404	0.000310575	0.00686153	106991617	antisense
Circ_008477	0	0	0	0	0	13.3731	35.817	134.749	0.001	45.9847	15.4889	0.0383318	0.276726	101105101	annot_exons
Circ_008515	0	45.4866	101.148	167.233	0	0	0	0	78.467	0.001	-16.2598	0.0042297	0.0555654	101117962	annot_exons
Circ_008529	0	0	0	0	0	26.7462	71.6341	119.777	0.001	54.5392	15.735	0.0134717	0.133459	101112344	one_exon
Circ_008546	0	0	0	0	68.7247	106.985	23.878	104.805	0.001	76.098	16.2156	0.000443657	0.00919342	NA	intergenic
Circ_008553	0	0	0	0	82.4697	40.1193	155.207	74.8604	0.001	88.1641	16.4279	9.00544e-05	0.0025138	101116170	annot_exons
Circ_008560	78.3239	45.4866	25.287	55.7445	206.174	147.104	179.085	59.8883	51.2105	148.063	1.5317	0.0268739	0.215702	101116170	annot_exons
Circ_008565	0	0	0	0	700.992	1725.13	1540.13	1676.87	0.001	1410.78	20.4281	1.30395e-20	1.04233e-17	100170328	antisense
Circ_008568	234.972	45.4866	50.574	0	0	0	0	0	82.7581	0.001	-16.3366	0.00315245	0.0444223	101117786	annot_exons
Circ_008570	0	22.7433	101.148	55.7445	0	0	0	0	44.9089	0.001	-15.4547	0.0385801	0.27801	101117786	annot_exons
Circ_008571	0	113.716	25.287	27.8722	0	0	0	0	41.7189	0.001	-15.3484	0.0441928	0.302324	101117786	annot_exons
Circ_008575	39.1619	0	0	0	302.389	187.223	262.658	104.805	9.79048	214.269	4.4519	4.86536e-06	0.000232506	101121291	annot_exons
Circ_008580	137.067	90.9732	101.148	83.6167	206.174	227.343	191.024	538.995	103.201	290.884	1.49498	0.0109263	0.114122	101121291	annot_exons
Circ_008583	0	0	0	0	27.4899	53.4924	23.878	134.749	0.001	59.9023	15.8703	0.00362697	0.049573	101121291	exon_intron
Circ_008587	97.9048	45.4866	0	83.6167	0	0	0	29.9442	56.752	7.48604	-2.9224	0.0405948	0.287322	101118300	annot_exons
Circ_008594	0	0	50.574	0	27.4899	53.4924	107.451	119.777	12.6435	77.0525	2.60745	0.0228634	0.192503	101120519	annot_exons
Circ_008596	0	0	0	0	27.4899	120.358	119.39	149.721	0.001	104.24	16.6695	4.37832e-05	0.00142764	NA	intergenic
Circ_008609	19.581	45.4866	227.583	250.85	0	0	0	0	135.875	0.001	-17.0519	0.000140718	0.00364725	101122304	annot_exons
Circ_008619	215.391	363.893	303.444	334.467	27.4899	40.1193	119.39	89.8325	304.299	69.208	-2.13648	7.94043e-05	0.00226199	101123068	annot_exons
Circ_008620	97.9048	159.203	0	111.489	13.7449	0	0	0	92.1492	3.43624	-4.74507	0.000637431	0.0122023	101123068	annot_exons
Circ_008642	0	0	25.287	0	109.96	26.7462	131.329	149.721	6.32175	104.439	4.04619	0.00133167	0.0222894	101123580	annot_exons
Circ_008663	234.972	636.812	429.879	334.467	109.96	93.6117	47.7561	74.8604	409.032	81.5469	-2.32651	2.1554e-05	0.000792278	101108250	annot_exons
Circ_008675	58.7429	22.7433	126.435	27.8722	151.194	93.6117	143.268	239.553	58.9484	156.907	1.41238	0.0461605	0.311265	101106543	annot_exons
Circ_008676	39.1619	0	0	0	54.9798	80.2386	59.6951	74.8604	9.79048	67.4435	2.78423	0.0284117	0.224864	101106543	annot_exons
Circ_008682	19.581	0	25.287	0	137.449	66.8655	131.329	89.8325	11.217	106.369	3.24532	0.000857554	0.0154835	NA	intergenic
Circ_008691	0	136.46	126.435	278.722	0	0	0	0	135.404	0.001	-17.0469	0.000250915	0.00579588	NA	intergenic
Circ_008694	39.1619	68.2299	227.583	195.106	0	13.3731	71.6341	0	132.52	21.2518	-2.64055	0.00964645	0.104331	NA	intergenic
Circ_008696	0	181.946	278.157	222.978	0	0	11.939	74.8604	170.77	21.6999	-2.9763	0.0205697	0.179019	101109643	antisense
Circ_008698	19.581	0	328.731	696.806	0	26.7462	0	0	261.279	6.68655	-5.28819	0.00134314	0.0224387	101109643	exon_intron
Circ_008699	58.7429	113.716	632.175	1365.74	0	13.3731	11.939	44.9162	542.594	17.5571	-4.94975	5.4516e-05	0.00170846	101109643	antisense
Circ_008703	176.229	22.7433	177.009	111.489	0	0	0	0	121.867	0.001	-16.895	4.36094e-05	0.00142373	101109643	antisense
Circ_008709	0	0	0	0	54.9798	40.1193	47.7561	0	0.001	35.7138	15.1242	0.0380859	0.275478	101110446	annot_exons
Circ_008715	0	0	50.574	0	54.9798	13.3731	226.841	74.8604	12.6435	92.5136	2.87127	0.0303611	0.235143	101103179	annot_exons
Circ_008726	117.486	136.46	101.148	55.7445	261.154	307.581	214.902	194.637	102.71	244.569	1.25167	0.0114489	0.118065	101117360	annot_exons
Circ_008728	137.067	204.69	101.148	27.8722	13.7449	26.7462	0	74.8604	117.694	28.8379	-2.02901	0.0262872	0.212774	101117360	annot_exons
Circ_008736	39.1619	45.4866	354.018	139.361	68.7247	53.4924	0	14.9721	144.507	34.2973	-2.07497	0.0379925	0.275104	101118472	annot_exons
Circ_008746	58.7429	90.9732	0	27.8722	0	0	11.939	0	44.3971	2.98475	-3.89478	0.0211885	0.182597	101123405	annot_exons
Circ_008753	0	0	0	0	27.4899	0	59.6951	44.9162	0.001	33.0253	15.0113	0.0431373	0.297611	101104684	annot_exons
Circ_008762	0	0	50.574	0	54.9798	66.8655	107.451	44.9162	12.6435	68.5532	2.43883	0.0272529	0.217916	101105438	annot_exons
Circ_008783	0	0	0	0	68.7247	26.7462	35.817	44.9162	0.001	44.0511	15.4269	0.00905262	0.0996658	101107131	annot_exons
Circ_008785	137.067	90.9732	0	27.8722	0	0	11.939	14.9721	63.978	6.72777	-3.24938	0.0221351	0.188506	101107383	annot_exons
Circ_008787	0	0	0	0	27.4899	0	59.6951	59.8883	0.001	36.7683	15.1662	0.0421064	0.293222	101107627	one_exon
Circ_008815	0	0	0	0	206.174	80.2386	59.6951	44.9162	0.001	97.756	16.5769	0.000137984	0.00359318	101110537	annot_exons
Circ_008819	0	0	0	0	151.194	80.2386	71.6341	149.721	0.001	113.197	16.7885	5.77668e-05	0.001779	101110537	annot_exons
Circ_008823	19.581	0	0	83.6167	54.9798	173.85	131.329	104.805	25.7994	116.241	2.17171	0.0166084	0.1545	101117961	annot_exons
Circ_008837	0	0	0	0	96.2146	106.985	35.817	44.9162	0.001	70.9832	16.1152	0.000627533	0.0120896	101111830	annot_exons
Circ_008843	19.581	0	0	0	109.96	80.2386	47.7561	44.9162	4.89524	70.7176	3.85262	0.00920874	0.100879	101111830	annot_exons
Circ_008844	0	0	0	83.6167	192.429	187.223	334.292	89.8325	20.9042	200.944	3.26493	0.000576934	0.0113408	101111830	annot_exons
Circ_008853	0	0	0	0	68.7247	53.4924	0	44.9162	0.001	41.7833	15.3506	0.0197434	0.174126	101111830	annot_exons
Circ_008855	19.581	0	0	0	151.194	26.7462	11.939	89.8325	4.89524	69.928	3.83642	0.0111533	0.115878	101111830	annot_exons
Circ_008864	0	0	0	0	68.7247	0	107.451	59.8883	0.001	59.016	15.8488	0.0049089	0.0623012	101119754	antisense
Circ_008867	78.3239	45.4866	75.861	27.8722	0	13.3731	0	14.9721	56.8859	7.08629	-3.00497	0.0143988	0.140209	101121881	annot_exons
Circ_008871	97.9048	181.946	303.444	111.489	0	13.3731	23.878	29.9442	173.696	16.7988	-3.37013	6.28225e-05	0.00188947	101122625	annot_exons
Circ_008883	0	0	0	0	41.2348	26.7462	35.817	14.9721	0.001	29.6925	14.8578	0.0388454	0.279002	101122886	annot_exons
Circ_008893	78.3239	136.46	252.87	0	0	0	0	0	116.913	0.001	-16.8351	0.000425483	0.0088578	101123406	annot_exons
Circ_008940	0	45.4866	0	0	164.939	240.716	322.353	733.632	11.3716	365.41	5.006	7.51763e-07	4.76701e-05	101109386	antisense
Circ_008942	1292.34	432.123	986.193	808.295	41.2348	0	0	0	879.739	10.3087	-6.41514	6.67492e-15	2.20097e-12	NA	intergenic
Circ_008946	0	22.7433	25.287	0	137.449	66.8655	107.451	44.9162	12.0076	89.1706	2.89262	0.00478457	0.0610901	101110359	annot_exons
Circ_008950	0	22.7433	0	0	151.194	80.2386	23.878	89.8325	5.68582	86.2859	3.92368	0.00454487	0.0586829	101110867	annot_exons
Circ_008976	0	0	0	0	27.4899	40.1193	35.817	14.9721	0.001	29.5996	14.8533	0.0385834	0.27801	NA	intergenic
Circ_008996	215.391	204.69	480.453	278.722	13.7449	66.8655	23.878	14.9721	294.814	29.8651	-3.30327	2.56404e-06	0.00013609	101117963	annot_exons
Circ_008997	763.658	591.326	910.332	362.339	109.96	66.8655	250.719	149.721	656.914	144.316	-2.18647	3.68289e-05	0.00122976	101117963	annot_exons
Circ_008998	176.229	45.4866	126.435	0	219.919	213.97	346.231	374.302	87.0376	288.606	1.72939	0.0131036	0.131102	101117963	annot_exons
Circ_009000	176.229	90.9732	75.861	27.8722	13.7449	13.3731	35.817	14.9721	92.7338	19.4768	-2.25134	0.0133029	0.132493	101117963	annot_exons
Circ_009003	0	0	0	0	109.96	147.104	71.6341	89.8325	0.001	104.633	16.675	8.34601e-05	0.00235717	101114808	annot_exons
Circ_009010	0	0	0	0	68.7247	40.1193	35.817	0	0.001	36.1653	15.1423	0.040959	0.288404	NA	intergenic
Circ_009052	19.581	22.7433	101.148	111.489	0	0	0	14.9721	63.7403	3.74302	-4.08993	0.0211279	0.182135	101121201	annot_exons
Circ_009064	0	0	0	0	316.134	53.4924	167.146	149.721	0.001	171.623	17.3889	1.33174e-05	0.00054046	101107629	annot_exons
Circ_009090	0	0	0	0	41.2348	53.4924	23.878	44.9162	0.001	40.8804	15.3191	0.0136098	0.134512	101114976	one_exon
Circ_009092	0	0	0	0	54.9798	66.8655	47.7561	29.9442	0.001	49.8864	15.6064	0.00316055	0.0444705	101113527	annot_exons
Circ_009093	0	22.7433	0	0	742.227	815.759	656.646	583.911	5.68582	699.636	6.94309	4.10761e-20	3.00985e-17	101113527	annot_exons
Circ_009094	0	0	0	0	192.429	427.939	119.39	119.777	0.001	214.884	17.7132	1.50061e-06	8.62408e-05	101113527	annot_exons
Circ_009102	783.239	796.015	910.332	1505.1	8191.99	4867.81	4942.75	3967.6	998.672	5492.54	2.45939	1.12041e-09	1.52347e-07	101115229	annot_exons
Circ_009105	19.581	45.4866	50.574	83.6167	0	0	11.939	0	49.8146	2.98475	-4.06088	0.00984638	0.105886	101116255	exon_intron
Circ_009113	19.581	0	0	0	164.939	66.8655	71.6341	29.9442	4.89524	83.3458	4.08966	0.00613231	0.0742037	101103923	annot_exons
Circ_009126	0	0	0	0	96.2146	0	107.451	29.9442	0.001	58.4025	15.8337	0.00695128	0.0818021	NA	intergenic
Circ_009127	0	0	0	0	109.96	187.223	71.6341	89.8325	0.001	114.662	16.807	6.98666e-05	0.00204552	NA	intergenic
Circ_009130	0	68.2299	0	0	274.899	227.343	334.292	164.693	17.0575	250.307	3.87522	6.78656e-06	0.000307676	NA	intergenic
Circ_009144	0	0	0	0	27.4899	13.3731	107.451	104.805	0.001	63.2797	15.9495	0.00287896	0.0411398	101104011	annot_exons
Circ_009148	0	0	0	0	41.2348	40.1193	23.878	29.9442	0.001	33.7941	15.0445	0.0216066	0.185052	101104011	annot_exons
Circ_009155	313.295	272.92	177.009	111.489	0	26.7462	35.817	44.9162	218.678	26.8699	-3.02475	2.16282e-05	0.000792278	101104527	annot_exons
Circ_009156	58.7429	90.9732	25.287	111.489	0	0	0	29.9442	71.623	7.48604	-3.25815	0.00633337	0.0762444	101104527	annot_exons
Circ_009160	117.486	90.9732	252.87	167.233	0	0	0	0	157.141	0.001	-17.2617	1.11684e-06	6.72629e-05	101104527	annot_exons
Circ_009161	2056	1864.95	960.906	1198.51	178.684	106.985	35.817	254.525	1520.09	144.003	-3.39999	5.5912e-09	6.27618e-07	101104527	annot_exons
Circ_009162	254.553	90.9732	151.722	55.7445	0	26.7462	0	29.9442	138.248	14.1726	-3.28608	0.000817608	0.0148845	101104527	annot_exons
Circ_009163	234.972	136.46	126.435	222.978	82.4697	0	0	0	180.211	20.6174	-3.12775	0.000571935	0.0112714	101104527	annot_exons
Circ_009166	822.401	409.379	328.731	501.7	412.348	120.358	71.6341	89.8325	515.553	173.543	-1.57083	0.0147777	0.142374	101104527	annot_exons
Circ_009167	841.982	818.759	480.453	836.167	192.429	200.596	202.963	254.525	744.34	212.629	-1.80763	9.37814e-07	5.83458e-05	101104527	annot_exons
Circ_009185	39.1619	0	0	0	27.4899	40.1193	23.878	224.581	9.79048	79.0171	3.01271	0.0284257	0.224907	101104527	annot_exons
Circ_009210	0	0	0	0	96.2146	66.8655	47.7561	74.8604	0.001	71.4241	16.1241	0.000347665	0.00756688	NA	intergenic
Circ_009244	0	0	0	0	164.939	213.97	238.78	74.8604	0.001	173.137	17.4016	1.44767e-06	8.41149e-05	NA	intergenic
Circ_009245	0	0	0	0	13.7449	66.8655	143.268	0	0.001	55.9697	15.7724	0.0152252	0.145516	NA	intergenic
Circ_009248	274.134	363.893	227.583	334.467	68.7247	133.731	143.268	14.9721	300.019	90.174	-1.73427	0.0019906	0.030852	101114903	annot_exons
Circ_009269	411.2	272.92	278.157	306.595	68.7247	106.985	35.817	119.777	317.218	82.8258	-1.93732	8.45416e-05	0.00238261	101117279	annot_exons
Circ_009277	0	45.4866	75.861	195.106	0	0	23.878	14.9721	79.1133	9.71253	-3.026	0.0301487	0.234026	101118988	annot_exons
Circ_009288	0	0	0	0	41.2348	66.8655	0	29.9442	0.001	34.5111	15.0748	0.0433595	0.298659	101121455	one_exon
Circ_009299	822.401	636.812	733.323	1644.46	247.409	454.685	226.841	254.525	959.249	295.865	-1.69697	0.000422487	0.00883104	101122306	annot_exons
Circ_009302	0	136.46	126.435	83.6167	0	13.3731	11.939	29.9442	86.6279	13.8141	-2.64869	0.0243971	0.20162	101122552	annot_exons
Circ_009310	97.9048	68.2299	25.287	111.489	0	0	0	0	75.7277	0.001	-16.2085	0.000690982	0.0129825	101123325	exon_intron
Circ_009320	97.9048	181.946	151.722	27.8722	54.9798	40.1193	23.878	29.9442	114.861	37.2303	-1.62534	0.042308	0.294083	101123582	annot_exons
Circ_009327	0	0	0	27.8722	13.7449	106.985	23.878	164.693	6.96806	77.3251	3.47211	0.0207957	0.18051	101103840	annot_exons
Circ_009349	0	0	0	0	192.429	133.731	59.6951	44.9162	0.001	107.693	16.7166	4.49815e-05	0.00146309	101105601	annot_exons
Circ_009365	156.648	272.92	303.444	306.595	137.449	80.2386	59.6951	14.9721	259.901	73.0888	-1.83024	0.00277876	0.0401429	101106794	annot_exons
Circ_009387	19.581	113.716	75.861	55.7445	0	0	0	14.9721	66.2257	3.74302	-4.14512	0.0103156	0.109327	101111125	annot_exons
Circ_009392	548.267	1137.16	455.166	752.55	123.705	80.2386	35.817	44.9162	723.287	71.1691	-3.34525	9.12964e-09	9.70073e-07	101112260	antisense
Circ_009405	39.1619	113.716	0	27.8722	0	0	0	0	45.1877	0.001	-15.4636	0.0271799	0.21753	101114389	exon_intron
Circ_009414	1664.38	682.299	1491.93	473.828	398.604	508.178	417.866	374.302	1078.11	424.737	-1.34386	0.00649322	0.0777153	101115312	annot_exons
Circ_009415	548.267	636.812	1011.48	557.445	219.919	213.97	191.024	434.19	688.501	264.776	-1.37869	0.0018473	0.0290751	101115312	exon_intron
Circ_009434	0	0	0	0	0	53.4924	107.451	44.9162	0.001	51.4649	15.6513	0.0110012	0.114703	101116347	annot_exons
Circ_009437	0	0	0	0	151.194	361.074	465.622	359.33	0.001	334.305	18.3508	6.00473e-10	8.66511e-08	101116347	annot_exons
Circ_009438	0	0	0	0	371.114	1136.71	740.219	988.157	0.001	809.051	19.6259	5.49732e-15	1.85915e-12	101116347	annot_exons
Circ_009439	0	0	0	0	549.798	575.043	859.609	1003.13	0.001	746.895	19.5105	3.40672e-17	1.66418e-14	101116347	annot_exons
Circ_009443	0	0	0	0	54.9798	106.985	119.39	29.9442	0.001	77.8247	16.2479	0.000290955	0.00653756	101116347	annot_exons
Circ_009446	0	0	0	0	54.9798	93.6117	107.451	0	0.001	64.0107	15.966	0.00343967	0.04758	101116347	annot_exons
Circ_009448	0	0	0	0	219.919	40.1193	250.719	44.9162	0.001	138.919	17.0839	4.30908e-05	0.00141556	101116347	annot_exons
Circ_009450	0	0	0	0	68.7247	106.985	143.268	119.777	0.001	109.689	16.7431	5.30373e-05	0.00167153	101116347	annot_exons
Circ_009451	0	0	0	0	247.409	26.7462	286.536	59.8883	0.001	155.145	17.2433	3.6757e-05	0.00122891	101116347	annot_exons
Circ_009452	0	0	0	0	54.9798	26.7462	35.817	44.9162	0.001	40.6148	15.3097	0.0134195	0.133231	101116347	annot_exons
Circ_009469	0	0	0	0	0	106.985	0	89.8325	0.001	49.2043	15.5865	0.0396871	0.283187	101120603	annot_exons
Circ_009471	0	0	0	0	54.9798	106.985	0	59.8883	0.001	55.4632	15.7592	0.00727333	0.0848201	101120603	annot_exons
Circ_009473	137.067	90.9732	25.287	55.7445	274.899	267.462	238.78	404.246	77.2679	296.347	1.93935	0.000787705	0.0145104	101120603	annot_exons
Circ_009494	0	0	0	0	0	26.7462	71.6341	59.8883	0.001	39.5671	15.272	0.0317164	0.242248	NA	intergenic
Circ_009521	58.7429	22.7433	25.287	250.85	13.7449	0	11.939	29.9442	89.4058	13.907	-2.68455	0.0314697	0.241026	101103425	annot_exons
Circ_009522	156.648	295.663	177.009	0	27.4899	40.1193	0	0	157.33	16.9023	-3.2185	0.00337508	0.0467904	101103425	annot_exons
Circ_009526	254.553	272.92	177.009	222.978	27.4899	40.1193	11.939	44.9162	231.865	31.1161	-2.89755	2.13647e-06	0.000117168	101104604	annot_exons
Circ_009528	39.1619	68.2299	50.574	0	0	0	0	0	39.4915	0.001	-15.2693	0.0277633	0.221059	101105528	annot_exons
Circ_009530	234.972	909.732	455.166	836.167	82.4697	80.2386	59.6951	0	609.009	55.6008	-3.45329	2.04068e-06	0.000112617	101105528	annot_exons
Circ_009531	19.581	45.4866	101.148	0	0	0	0	0	41.5539	0.001	-15.3427	0.037944	0.274979	101105528	annot_exons
Circ_009537	156.648	22.7433	75.861	222.978	27.4899	0	0	44.9162	119.557	18.1015	-2.72352	0.0109219	0.114122	101106364	annot_exons
Circ_009538	19.581	68.2299	50.574	83.6167	0	0	0	0	55.5004	0.001	-15.7602	0.00440573	0.0572624	101106364	annot_exons
Circ_009555	274.134	636.812	505.74	334.467	96.2146	173.85	250.719	119.777	437.788	160.14	-1.4509	0.00397993	0.0530771	101107551	annot_exons
Circ_009592	548.267	591.326	480.453	613.189	123.705	160.477	83.5731	44.9162	558.309	103.168	-2.43607	1.38074e-08	1.35166e-06	101108516	annot_exons
Circ_009596	78.3239	136.46	75.861	83.6167	54.9798	0	0	0	93.5653	13.7449	-2.76707	0.00845783	0.094819	101108516	annot_exons
Circ_009605	39.1619	159.203	75.861	111.489	13.7449	53.4924	11.939	29.9442	96.4287	27.2801	-1.82161	0.0400662	0.28488	101117878	annot_exons
Circ_009627	19.581	90.9732	151.722	111.489	0	0	0	14.9721	93.4413	3.74302	-4.64179	0.000202964	0.00489842	101112675	annot_exons
Circ_009652	567.848	454.866	657.462	222.978	178.684	26.7462	202.963	44.9162	475.789	113.328	-2.06982	0.00212288	0.03257	101115572	annot_exons
Circ_009676	0	0	0	0	68.7247	93.6117	83.5731	44.9162	0.001	72.7064	16.1498	0.000218733	0.00521695	101120357	annot_exons
Circ_009716	0	0	0	0	27.4899	53.4924	11.939	44.9162	0.001	34.4594	15.0726	0.0285182	0.225301	101122217	one_exon
Circ_009763	0	0	0	0	109.96	133.731	71.6341	134.749	0.001	112.518	16.7798	3.4205e-05	0.00115679	101109828	annot_exons
Circ_009765	1781.87	2319.82	2478.13	3093.82	233.664	414.566	334.292	314.414	2418.41	324.234	-2.89895	1.76746e-17	9.3775e-15	NA	intergenic
Circ_009767	411.2	1341.85	1213.78	1142.76	137.449	173.85	226.841	329.386	1027.4	216.882	-2.24402	1.72375e-05	0.000657431	NA	intergenic
Circ_009805	58.7429	45.4866	101.148	222.978	0	13.3731	23.878	0	107.089	9.31278	-3.52345	0.00268413	0.0391832	101122892	annot_exons
Circ_009814	176.229	432.123	227.583	167.233	0	0	0	0	250.792	0.001	-17.9361	5.2008e-09	6.01549e-07	101103593	annot_exons
Circ_009816	176.229	113.716	328.731	167.233	27.4899	26.7462	0	14.9721	196.477	17.302	-3.50535	1.0016e-05	0.000426142	101103593	annot_exons
Circ_009836	0	0	0	0	123.705	66.8655	59.6951	149.721	0.001	99.9965	16.6096	0.00020953	0.0050293	101105280	one_exon
Circ_009838	0	0	0	0	27.4899	26.7462	47.7561	14.9721	0.001	29.2411	14.8357	0.0409747	0.288404	101105280	exon_intron
Circ_009840	0	0	0	0	13.7449	66.8655	47.7561	14.9721	0.001	35.8346	15.1291	0.033518	0.252011	101105280	exon_intron
Circ_009858	58.7429	90.9732	101.148	55.7445	13.7449	0	0	14.9721	76.6521	7.17926	-3.41642	0.00194865	0.0303803	101106365	annot_exons
Circ_009872	430.781	181.946	328.731	27.8722	27.4899	120.358	0	59.8883	242.333	51.934	-2.22224	0.0154128	0.146355	101106365	annot_exons
Circ_009876	137.067	22.7433	0	27.8722	0	0	0	0	46.9206	0.001	-15.5179	0.0334615	0.251763	101103094	one_exon
Circ_009879	254.553	22.7433	101.148	195.106	68.7247	26.7462	23.878	59.8883	143.387	44.8093	-1.67805	0.045355	0.307247	106991695	exon_intron
Circ_009882	137.067	204.69	252.87	111.489	27.4899	0	23.878	0	176.529	12.842	-3.78096	4.67326e-06	0.000224138	NA	intergenic
Circ_009893	195.81	204.69	252.87	306.595	41.2348	147.104	71.6341	29.9442	239.991	72.4793	-1.72734	0.00282644	0.0405873	101107633	annot_exons
Circ_009894	1683.96	1341.85	1593.08	1867.44	646.013	575.043	537.256	538.995	1621.58	574.327	-1.49746	1.2982e-11	2.48154e-09	101107633	annot_exons
Circ_009897	313.295	295.663	126.435	278.722	123.705	173.85	131.329	29.9442	253.529	114.707	-1.1442	0.0486886	0.323027	101107633	annot_exons
Circ_009900	0	0	0	0	13.7449	40.1193	47.7561	14.9721	0.001	29.1481	14.8311	0.0466339	0.313883	101107633	annot_exons
Circ_009912	0	0	0	0	13.7449	40.1193	71.6341	104.805	0.001	57.5757	15.8132	0.00415943	0.0548882	101108340	annot_exons
Circ_009923	0	0	0	0	54.9798	26.7462	59.6951	89.8325	0.001	57.8134	15.8191	0.00226698	0.0341523	101108603	annot_exons
Circ_009939	156.648	45.4866	177.009	139.361	0	26.7462	0	29.9442	129.626	14.1726	-3.19318	0.000758521	0.0140573	443229	annot_exons
Circ_009960	0	0	50.574	27.8722	82.4697	80.2386	71.6341	149.721	19.6116	96.0158	2.29157	0.0160795	0.151162	101112165	annot_exons
Circ_009983	0	0	0	0	27.4899	13.3731	23.878	59.8883	0.001	31.1573	14.9273	0.0457623	0.309133	101113532	annot_exons
Circ_009987	78.3239	250.176	101.148	167.233	82.4697	0	59.6951	44.9162	149.22	46.7703	-1.67378	0.0255215	0.20869	101104859	annot_exons
Circ_009994	19.581	0	0	0	192.429	106.985	47.7561	89.8325	4.89524	109.251	4.48012	0.000761381	0.0140904	101105106	annot_exons
Circ_009996	0	0	0	0	41.2348	40.1193	47.7561	14.9721	0.001	36.0206	15.1365	0.0237583	0.197662	101115069	annot_exons
Circ_009998	0	22.7433	0	0	82.4697	147.104	71.6341	149.721	5.68582	112.732	4.30939	0.000251618	0.00580194	101115069	annot_exons
Circ_010006	0	0	0	0	0	26.7462	71.6341	89.8325	0.001	47.0532	15.522	0.0173574	0.158983	101117192	exon_intron
Circ_010009	1958.1	2547.25	2301.12	1951.06	453.583	280.835	465.622	658.771	2189.38	464.703	-2.23614	9.47773e-12	1.85195e-09	101117192	annot_exons
Circ_010010	3779.13	3161.32	2983.87	2146.16	934.657	1310.56	1241.66	1691.84	3017.62	1294.68	-1.22081	9.19566e-05	0.00255878	101117192	annot_exons
Circ_010013	117.486	90.9732	202.296	83.6167	13.7449	13.3731	59.6951	29.9442	123.593	29.1893	-2.08208	0.00698382	0.0820246	101117192	annot_exons
Circ_010026	39.1619	136.46	75.861	27.8722	0	0	0	0	69.8387	0.001	-16.0917	0.00162623	0.0261576	100820755	annot_exons
Circ_010029	78.3239	22.7433	328.731	111.489	0	0	11.939	0	135.322	2.98475	-5.50264	9.51327e-05	0.00263881	NA	intergenic
Circ_010051	0	0	0	0	0	53.4924	23.878	74.8604	0.001	38.0577	15.2159	0.0335507	0.252011	101120524	annot_exons
Circ_010079	0	0	50.574	0	137.449	147.104	286.536	239.553	12.6435	202.661	4.0026	1.57096e-05	0.000614926	101102425	annot_exons
Circ_010081	0	0	0	0	41.2348	40.1193	35.817	14.9721	0.001	33.0358	15.0117	0.0239096	0.198462	101102425	annot_exons
Circ_010085	0	0	0	0	27.4899	13.3731	47.7561	119.777	0.001	52.0989	15.669	0.00872117	0.0969881	101102425	annot_exons
Circ_010094	0	0	0	0	41.2348	26.7462	47.7561	29.9442	0.001	36.4203	15.1525	0.0210368	0.181673	NA	intergenic
Circ_010095	0	0	0	0	137.449	80.2386	155.207	74.8604	0.001	111.939	16.7724	5.07764e-05	0.00161572	NA	intergenic
Circ_010096	0	0	0	0	41.2348	13.3731	35.817	59.8883	0.001	37.5783	15.1976	0.0174876	0.159673	NA	intergenic
Circ_010133	137.067	227.433	455.166	195.106	82.4697	40.1193	35.817	14.9721	253.693	43.3445	-2.54916	0.00027978	0.00634047	101104528	annot_exons
Circ_010134	97.9048	90.9732	0	27.8722	0	0	0	0	54.1876	0.001	-15.7257	0.0125815	0.127307	101104528	annot_exons
Circ_010141	274.134	272.92	252.87	27.8722	27.4899	0	0	14.9721	206.949	10.6155	-4.28503	3.45889e-05	0.00116529	101111578	annot_exons
Circ_010159	0	0	0	0	68.7247	13.3731	119.39	149.721	0.001	87.8022	16.422	0.000381598	0.00816397	NA	intergenic
Circ_010163	0	0	0	0	96.2146	267.462	143.268	314.414	0.001	205.34	17.6477	5.96772e-07	3.91599e-05	443272	annot_exons
Circ_010194	215.391	136.46	252.87	167.233	27.4899	13.3731	59.6951	29.9442	192.988	32.6256	-2.56444	5.16793e-05	0.00164049	101117449	annot_exons
Circ_010217	19.581	0	0	55.7445	261.154	294.208	83.5731	194.637	18.8314	208.393	3.4681	0.000114861	0.00309806	101114056	annot_exons
Circ_010225	0	45.4866	0	0	137.449	66.8655	143.268	44.9162	11.3716	98.1248	3.10918	0.00475113	0.0607514	101114468	exon_intron
Circ_010227	195.81	454.866	126.435	947.656	1566.92	1404.18	2447.5	1407.38	431.192	1706.49	1.98463	0.00149792	0.0245884	101114468	one_exon
Circ_010228	0	0	0	0	27.4899	26.7462	59.6951	14.9721	0.001	32.2258	14.9759	0.0291038	0.228151	101114468	exon_intron
Circ_010239	234.972	204.69	379.305	55.7445	41.2348	93.6117	35.817	29.9442	218.678	50.1519	-2.12443	0.00466868	0.0599879	101119508	one_exon
Circ_010242	195.81	45.4866	101.148	0	13.7449	13.3731	0	14.9721	85.6111	10.5225	-3.02432	0.0138871	0.136486	NA	intergenic
Circ_010243	97.9048	159.203	25.287	445.956	82.4697	40.1193	35.817	59.8883	182.088	54.5736	-1.73836	0.0456623	0.308932	NA	intergenic
Circ_010244	1488.15	227.433	581.601	529.572	137.449	106.985	11.939	74.8604	706.69	82.8084	-3.09323	6.15937e-05	0.00186781	NA	intergenic
Circ_010248	0	0	0	0	233.664	26.7462	35.817	74.8604	0.001	92.7719	16.5014	0.000646916	0.0123659	101120275	annot_exons
Circ_010251	0	0	75.861	0	178.684	93.6117	71.6341	134.749	18.9653	119.67	2.65763	0.00983782	0.105837	101120275	one_exon
Circ_010259	0	0	0	0	68.7247	26.7462	23.878	14.9721	0.001	33.5803	15.0353	0.0315854	0.241645	101115230	exon_intron
Circ_010261	0	0	0	0	82.4697	13.3731	35.817	59.8883	0.001	47.887	15.5473	0.00865271	0.096413	101115230	exon_intron
Circ_010265	0	0	0	0	481.073	227.343	453.683	464.134	0.001	406.558	18.6331	1.35596e-12	3.0058e-10	101115230	exon_intron
Circ_010266	0	0	0	0	192.429	66.8655	119.39	134.749	0.001	128.358	16.9698	1.78395e-05	0.000677104	101115230	exon_intron
Circ_010267	0	22.7433	25.287	0	82.4697	40.1193	131.329	404.246	12.0076	164.541	3.77643	0.00130622	0.0219609	101115230	one_exon
Circ_010268	39.1619	22.7433	0	0	137.449	120.358	143.268	359.33	15.4763	190.101	3.61864	9.97808e-05	0.00274465	101115230	one_exon
Circ_010269	0	0	0	0	68.7247	93.6117	59.6951	134.749	0.001	89.195	16.4447	4.33752e-05	0.00141917	101115230	exon_intron
Circ_010270	0	0	25.287	27.8722	123.705	53.4924	47.7561	134.749	13.2898	89.9254	2.75841	0.00571809	0.070419	101115230	annot_exons
Circ_010271	0	0	25.287	0	68.7247	93.6117	71.6341	209.609	6.32175	110.895	4.13272	0.000802969	0.0147094	101115230	annot_exons
Circ_010272	19.581	0	25.287	0	96.2146	66.8655	119.39	284.469	11.217	141.735	3.65944	0.000585027	0.0114484	101115230	annot_exons
Circ_010275	58.7429	0	25.287	55.7445	233.664	240.716	405.927	658.771	34.9436	384.769	3.46089	4.35512e-06	0.000210796	101115230	exon_intron
Circ_010277	39.1619	90.9732	25.287	55.7445	302.389	93.6117	262.658	838.436	52.7916	374.274	2.82571	0.000780887	0.014415	101115230	annot_exons
Circ_010278	19.581	45.4866	25.287	55.7445	247.409	334.327	143.268	449.162	36.5248	293.542	3.00662	1.49768e-05	0.000596785	101115230	annot_exons
Circ_010279	58.7429	22.7433	75.861	83.6167	247.409	160.477	202.963	254.525	60.241	216.344	1.84451	0.00189666	0.0297102	101115230	antisense
Circ_010280	117.486	22.7433	101.148	195.106	439.838	655.282	226.841	449.162	109.121	442.781	2.02067	0.000903064	0.0161614	101115230	annot_exons
Circ_010281	215.391	250.176	202.296	195.106	1580.67	1591.4	1026.76	1377.43	215.742	1394.06	2.69192	3.32144e-15	1.15285e-12	101115230	antisense
Circ_010282	195.81	113.716	328.731	473.828	1621.9	1898.98	859.609	1871.51	278.021	1563	2.49105	2.70217e-06	0.000141636	101115230	antisense
Circ_010283	254.553	113.716	303.444	167.233	632.268	1578.03	465.622	688.716	209.737	841.158	2.0038	0.000395434	0.00836499	101115230	antisense
Circ_010284	195.81	295.663	303.444	111.489	2075.49	615.162	1313.29	4581.46	226.601	2146.35	3.24366	4.37523e-06	0.000211381	101115230	antisense
Circ_010285	117.486	45.4866	75.861	139.361	302.389	534.924	35.817	299.442	94.5486	293.143	1.63248	0.0380128	0.275176	101115230	annot_exons
Circ_010286	215.391	295.663	252.87	195.106	1305.77	1457.67	740.219	1033.07	239.757	1134.18	2.24201	1.55776e-08	1.51074e-06	101115230	one_exon
Circ_010287	39.1619	22.7433	0	27.8722	96.2146	200.596	59.6951	164.693	22.4444	130.3	2.53741	0.00466848	0.0599879	101115230	annot_exons
Circ_010288	39.1619	0	25.287	55.7445	123.705	133.731	59.6951	104.805	30.0484	105.484	1.81166	0.0241099	0.19981	101115230	annot_exons
Circ_010290	78.3239	45.4866	25.287	27.8722	151.194	173.85	143.268	509.051	44.2424	244.341	2.46539	0.0016537	0.0265186	101115230	antisense
Circ_010291	78.3239	45.4866	25.287	0	151.194	187.223	155.207	568.939	37.2744	265.641	2.83322	0.000814352	0.014856	101115230	annot_exons
Circ_010292	19.581	0	25.287	83.6167	247.409	213.97	167.146	419.218	32.1212	261.936	3.02762	6.50593e-05	0.00193921	101115230	annot_exons
Circ_010300	0	0	0	0	82.4697	80.2386	0	44.9162	0.001	51.9061	15.6636	0.00972439	0.104916	NA	intergenic
Circ_010305	0	22.7433	0	0	82.4697	147.104	119.39	119.777	5.68582	117.185	4.36528	0.000100003	0.0027479	101121295	annot_exons
Circ_010311	0	0	0	0	13.7449	53.4924	131.329	119.777	0.001	79.5858	16.2802	0.00068018	0.012862	101121295	annot_exons
Circ_010320	19.581	0	25.287	0	54.9798	66.8655	107.451	134.749	11.217	91.0113	3.02036	0.0039892	0.053147	101121295	annot_exons
Circ_010324	0	0	0	0	302.389	294.208	262.658	134.749	0.001	248.501	17.9229	4.24346e-09	5.04226e-07	101121295	annot_exons
Circ_010343	0	136.46	101.148	167.233	0	0	0	0	101.21	0.001	-16.627	0.000684698	0.0129264	101121295	annot_exons
Circ_010345	0	0	0	0	164.939	93.6117	11.939	194.637	0.001	116.282	16.8273	0.000136914	0.0035759	101121295	annot_exons
Circ_010353	0	0	0	0	27.4899	80.2386	71.6341	0	0.001	44.8406	15.4525	0.0223449	0.189574	101121295	annot_exons
Circ_010356	39.1619	68.2299	75.861	139.361	2460.35	1564.65	2734.03	1736.76	80.6535	2123.95	4.71887	1.42209e-20	1.10333e-17	101121295	annot_exons
Circ_010357	0	0	0	0	247.409	160.477	453.683	374.302	0.001	308.968	18.2371	1.52567e-09	1.97282e-07	101121295	annot_exons
Circ_010377	0	68.2299	126.435	55.7445	0	0	23.878	0	62.6023	5.96951	-3.39053	0.0331401	0.250058	101117964	annot_exons
Circ_010380	19.581	0	177.009	139.361	0	26.7462	0	0	83.9878	6.68655	-3.65085	0.01579	0.149239	101118475	annot_exons
Circ_010381	234.972	159.203	151.722	390.211	824.697	895.997	811.853	658.771	234.027	797.83	1.76941	1.56727e-05	0.000614926	101118475	annot_exons
Circ_010392	0	22.7433	0	0	27.4899	40.1193	59.6951	74.8604	5.68582	50.5412	3.15202	0.0471101	0.315972	101123584	annot_exons
Circ_010400	274.134	181.946	303.444	418.084	13.7449	93.6117	35.817	164.693	294.402	76.9666	-1.93548	0.004046	0.0537139	101120863	annot_exons
Circ_010402	234.972	22.7433	126.435	55.7445	0	0	0	29.9442	109.974	7.48604	-3.87681	0.00125948	0.0212973	101120863	annot_exons
Circ_010407	19.581	113.716	151.722	111.489	13.7449	13.3731	35.817	29.9442	99.1271	23.2198	-2.09392	0.0257284	0.209507	101121712	annot_exons
Circ_010415	0	0	0	0	123.705	66.8655	119.39	14.9721	0.001	81.2331	16.3098	0.000374411	0.00805305	101121712	antisense
Circ_010416	19.581	22.7433	0	55.7445	536.053	615.162	393.988	464.134	24.5172	502.334	4.35678	2.55567e-12	5.39329e-10	101121712	antisense
Circ_010417	0	0	0	0	164.939	26.7462	83.5731	14.9721	0.001	72.5577	16.1468	0.00182188	0.0287265	101121712	antisense
Circ_010418	0	0	0	0	82.4697	66.8655	0	59.8883	0.001	52.3059	15.6747	0.00884612	0.0979236	101121712	antisense
Circ_010424	0	0	0	0	82.4697	80.2386	83.5731	29.9442	0.001	69.0564	16.0755	0.000479856	0.0098125	101103268	annot_exons
Circ_010426	39.1619	0	0	0	109.96	66.8655	107.451	14.9721	9.79048	74.8121	2.93382	0.0308846	0.23787	101103268	annot_exons
Circ_010430	0	0	0	0	123.705	13.3731	47.7561	44.9162	0.001	57.4375	15.8097	0.00505829	0.0638376	101103268	annot_exons
Circ_010433	0	0	0	0	68.7247	53.4924	59.6951	44.9162	0.001	56.7071	15.7912	0.00151109	0.0247356	101103268	annot_exons
Circ_010456	0	22.7433	0	111.489	151.194	294.208	107.451	119.777	33.5581	168.158	2.32508	0.0111282	0.115707	101104529	annot_exons
Circ_010462	0	113.716	126.435	27.8722	618.523	949.49	596.951	658.771	67.0059	705.934	3.39717	5.45e-08	4.69822e-06	101106796	annot_exons
Circ_010463	0	0	0	55.7445	316.134	294.208	393.988	344.358	13.9361	337.172	4.59658	1.67831e-09	2.12847e-07	101106796	exon_intron
Circ_010464	0	45.4866	0	0	82.4697	227.343	226.841	104.805	11.3716	160.365	3.81784	0.000143001	0.00369462	101106796	exon_intron
Circ_010471	0	0	0	0	54.9798	93.6117	35.817	0	0.001	46.1021	15.4925	0.0158915	0.149805	101106796	annot_exons
Circ_010479	0	0	0	0	41.2348	26.7462	95.5121	44.9162	0.001	52.1023	15.6691	0.00442823	0.0574017	NA	intergenic
Circ_010480	0	0	0	0	68.7247	240.716	131.329	164.693	0.001	151.366	17.2077	7.45362e-06	0.000332127	NA	intergenic
Circ_010485	0	0	0	0	343.624	307.581	274.597	239.553	0.001	291.339	18.1523	7.27031e-12	1.47526e-09	101107309	annot_exons
Circ_010486	78.3239	45.4866	25.287	55.7445	1580.67	2153.07	1958	1796.65	51.2105	1872.1	5.19207	7.75728e-33	2.92328e-29	101107309	annot_exons
Circ_010488	0	0	0	0	123.705	133.731	119.39	89.8325	0.001	116.665	16.832	1.53599e-05	0.000608377	101107309	annot_exons
Circ_010491	0	0	0	139.361	357.369	294.208	429.805	209.609	34.8403	322.748	3.21158	0.000395308	0.00836499	101107309	annot_exons
Circ_010492	0	0	0	0	54.9798	160.477	47.7561	89.8325	0.001	88.2614	16.4295	0.000140575	0.00364725	101107309	annot_exons
Circ_010493	0	0	0	0	54.9798	53.4924	155.207	74.8604	0.001	84.6349	16.369	0.000124554	0.00333227	101107309	annot_exons
Circ_010494	19.581	0	25.287	0	206.174	240.716	393.988	119.777	11.217	240.164	4.42026	1.25538e-06	7.5092e-05	101107309	annot_exons
Circ_010498	19.581	0	101.148	222.978	1814.33	2099.58	1408.8	1572.07	85.9267	1723.7	4.32625	5.33942e-09	6.09734e-07	101107309	annot_exons
Circ_010499	0	0	0	0	1456.96	1270.44	1432.68	868.38	0.001	1257.12	20.2617	4.06233e-25	5.35094e-22	101107309	annot_exons
Circ_010500	0	0	0	0	82.4697	133.731	47.7561	29.9442	0.001	73.4752	16.165	0.000552753	0.0109715	101107309	annot_exons
Circ_010501	0	22.7433	0	0	1305.77	1725.13	1635.65	1227.71	5.68582	1473.56	8.01772	1.85903e-29	4.08661e-26	101107309	annot_exons
Circ_010502	0	0	50.574	0	1223.3	1457.67	1432.68	1092.96	12.6435	1301.65	6.6858	9.08055e-26	1.30988e-22	101107309	annot_exons
Circ_010504	19.581	68.2299	25.287	139.361	247.409	294.208	298.475	179.665	63.1148	254.939	2.0141	0.00131635	0.0220902	101107309	annot_exons
Circ_010507	19.581	0	75.861	0	343.624	80.2386	155.207	134.749	23.8605	178.455	2.90286	0.00221805	0.0335956	101107309	annot_exons
Circ_010514	0	0	0	0	13.7449	120.358	107.451	14.9721	0.001	64.1315	15.9687	0.00409542	0.054288	101107309	exon_intron
Circ_010542	0	0	0	0	219.919	280.835	119.39	104.805	0.001	181.237	17.4675	9.77073e-07	6.06452e-05	101109212	antisense
Circ_010543	0	0	0	0	41.2348	26.7462	35.817	14.9721	0.001	29.6925	14.8578	0.0388442	0.279002	101109212	antisense
Circ_010545	0	0	0	0	68.7247	66.8655	191.024	29.9442	0.001	89.1397	16.4438	0.000237323	0.00554503	NA	intergenic
Circ_010556	0	0	0	0	41.2348	133.731	0	59.8883	0.001	58.7135	15.8414	0.00898734	0.099095	100188916	annot_exons
Circ_010566	0	0	0	0	109.96	13.3731	59.6951	74.8604	0.001	64.472	15.9764	0.00171105	0.027355	101110621	annot_exons
Circ_010569	0	0	0	0	192.429	133.731	119.39	14.9721	0.001	115.131	16.8129	6.21442e-05	0.00187993	NA	intergenic
Circ_010575	78.3239	113.716	278.157	55.7445	13.7449	0	0	29.9442	131.485	10.9223	-3.58956	0.000658423	0.0125405	101108604	annot_exons
Circ_010576	117.486	295.663	202.296	83.6167	0	0	47.7561	0	174.765	11.939	-3.87166	6.53723e-05	0.0019419	101108604	annot_exons
Circ_010577	195.81	136.46	354.018	27.8722	54.9798	0	59.6951	0	178.54	28.6687	-2.6387	0.007883	0.0901805	101108604	one_exon
Circ_010595	58.7429	159.203	101.148	278.722	27.4899	13.3731	23.878	14.9721	149.454	19.9283	-2.90681	0.00081626	0.0148805	105602911	exon_intron
Circ_010598	234.972	0	50.574	111.489	0	0	0	0	99.2586	0.001	-16.5989	0.00106001	0.0185424	101114308	annot_exons
Circ_010616	19.581	113.716	50.574	55.7445	0	13.3731	11.939	14.9721	59.904	10.071	-2.57244	0.0346258	0.257222	101114978	annot_exons
Circ_010627	0	22.7433	25.287	0	426.093	294.208	202.963	419.218	12.0076	335.621	4.80482	5.80979e-09	6.49391e-07	101115991	exon_intron
Circ_010628	0	0	0	0	151.194	173.85	155.207	179.665	0.001	164.979	17.3319	1.35747e-07	1.04399e-05	101110707	exon_intron
Circ_010629	39.1619	0	126.435	222.978	0	0	0	0	97.1437	0.001	-16.5678	0.00173607	0.0276712	101116258	antisense
Circ_010632	0	113.716	0	139.361	0	0	0	0	63.2694	0.001	-15.9492	0.0216195	0.185102	101111230	one_exon
Circ_010633	0	0	0	0	54.9798	120.358	107.451	164.693	0.001	111.87	16.7715	6.76818e-05	0.00199707	101111230	exon_intron
Circ_010648	137.067	22.7433	50.574	0	0	0	0	0	52.596	0.001	-15.6827	0.0161796	0.151695	101120111	annot_exons
Circ_010653	0	0	0	0	123.705	173.85	47.7561	89.8325	0.001	108.786	16.7311	0.000150985	0.00387059	NA	intergenic
Circ_010669	0	0	0	0	82.4697	267.462	238.78	89.8325	0.001	169.636	17.3721	7.31881e-06	0.000327975	101114816	annot_exons
Circ_010676	0	0	25.287	0	54.9798	213.97	131.329	104.805	6.32175	126.271	4.32005	0.000242186	0.0056337	101114816	one_exon
Circ_010687	0	0	0	0	41.2348	53.4924	47.7561	0	0.001	35.6208	15.1204	0.0379378	0.274979	NA	intergenic
Circ_010690	0	0	0	0	96.2146	0	95.5121	59.8883	0.001	62.9038	15.9409	0.00333557	0.04637	NA	intergenic
Circ_010704	0	0	0	0	54.9798	0	11.939	479.106	0.001	136.506	17.0586	0.00313718	0.044278	105602994	exon_intron
Circ_010705	0	0	0	0	27.4899	0	0	344.358	0.001	92.9619	16.5044	0.0130862	0.131056	105602994	antisense
Circ_010706	0	0	0	0	618.523	53.4924	83.5731	434.19	0.001	297.445	18.1823	2.26291e-06	0.000123333	105602994	antisense
Circ_010717	0	0	0	0	54.9798	40.1193	71.6341	74.8604	0.001	60.3984	15.8822	0.00101564	0.0179328	NA	intergenic
Circ_010735	0	0	101.148	83.6167	426.093	133.731	202.963	179.665	46.1912	235.613	2.35073	0.0068658	0.0811297	101119423	annot_exons
Circ_010743	0	0	0	0	41.2348	26.7462	0	89.8325	0.001	39.4534	15.2679	0.0352648	0.260429	101119674	intronic
Circ_010744	39.1619	0	0	0	591.033	387.82	298.475	164.693	9.79048	360.505	5.2025	6.36736e-08	5.41821e-06	101119674	intronic
Circ_010748	78.3239	22.7433	50.574	27.8722	13.7449	0	0	0	44.8784	3.43624	-3.70712	0.0435295	0.299574	101105532	annot_exons
Circ_010763	176.229	90.9732	50.574	83.6167	54.9798	0	23.878	0	100.348	19.7145	-2.34769	0.0125458	0.126994	101109302	annot_exons
Circ_010769	0	0	0	0	123.705	147.104	47.7561	164.693	0.001	120.814	16.8824	5.02261e-05	0.00160676	101109914	annot_exons
Circ_010779	0	0	0	0	27.4899	254.089	95.5121	179.665	0.001	139.189	17.0867	2.30156e-05	0.000832589	101102934	exon_intron
Circ_010799	117.486	295.663	0	167.233	0	0	11.939	0	145.096	2.98475	-5.60325	0.000128619	0.00341658	101104430	annot_exons
Circ_010815	646.172	1114.42	1542.51	2397.01	3793.61	4693.96	3724.97	3069.28	1425.03	3820.45	1.42275	0.00151793	0.0248089	101118990	exon_intron
Circ_010824	0	0	0	0	27.4899	93.6117	23.878	74.8604	0.001	54.96	15.7461	0.00368951	0.0502196	101113175	annot_exons
Circ_010826	0	68.2299	0	27.8722	96.2146	80.2386	179.085	89.8325	24.0255	111.343	2.21237	0.0145934	0.141581	101113175	annot_exons
Circ_010832	0	0	0	55.7445	68.7247	66.8655	202.963	149.721	13.9361	122.069	3.13079	0.00419453	0.0552685	101113175	annot_exons
Circ_010837	19.581	45.4866	0	0	151.194	267.462	405.927	104.805	16.2669	232.347	3.83627	2.80702e-05	0.000978155	101115485	annot_exons
Circ_010845	0	0	0	0	54.9798	26.7462	11.939	29.9442	0.001	30.9023	14.9154	0.0447396	0.304703	101116259	antisense
Circ_010857	156.648	90.9732	0	222.978	0	0	0	14.9721	117.65	3.74302	-4.97415	0.00178428	0.0282688	NA	intergenic
Circ_010862	58.7429	68.2299	25.287	0	0	0	0	0	38.0649	0.001	-15.2162	0.0425096	0.29525	NA	intergenic
Circ_010868	58.7429	68.2299	126.435	55.7445	0	0	11.939	14.9721	77.2881	6.72777	-3.52204	0.00233502	0.034918	NA	intergenic
Circ_010873	19.581	250.176	50.574	167.233	13.7449	26.7462	35.817	44.9162	121.891	30.3061	-2.00791	0.0301422	0.234026	101114391	annot_exons
Circ_010877	0	204.69	151.722	55.7445	13.7449	13.3731	0	0	103.039	6.77951	-3.92587	0.00355833	0.0489136	101114391	annot_exons
Circ_010890	1037.79	2046.9	708.036	1254.25	316.134	548.297	405.927	284.469	1261.74	388.707	-1.69867	0.000229251	0.00540552	101115908	annot_exons
Circ_010907	19.581	113.716	75.861	55.7445	0	0	0	0	66.2257	0.001	-16.0151	0.00223674	0.0338126	101110624	intronic
Circ_010910	195.81	90.9732	50.574	278.722	0	0	0	0	154.02	0.001	-17.2328	6.78826e-06	0.000307676	101110624	annot_exons
Circ_010918	372.038	227.433	227.583	278.722	54.9798	26.7462	11.939	0	276.444	23.4163	-3.56141	7.47216e-08	6.27547e-06	101116680	annot_exons
Circ_010922	39.1619	136.46	202.296	27.8722	0	0	0	0	101.448	0.001	-16.6304	0.000250103	0.00578725	101116680	annot_exons
Circ_010929	0	0	0	0	41.2348	66.8655	11.939	134.749	0.001	63.697	15.9589	0.00283365	0.0406686	101110879	exon_intron
Circ_010930	0	0	0	0	13.7449	120.358	119.39	59.8883	0.001	78.3453	16.2576	0.000583842	0.0114422	101110879	antisense
Circ_010935	0	0	0	0	371.114	267.462	358.17	194.637	0.001	297.846	18.1842	7.32216e-11	1.2072e-08	101110879	exon_intron
Circ_010937	0	0	0	0	27.4899	13.3731	47.7561	74.8604	0.001	40.8699	15.3187	0.0201439	0.176069	101110879	exon_intron
Circ_010938	58.7429	250.176	126.435	27.8722	329.879	374.447	310.414	344.358	115.807	339.774	1.55286	0.00926644	0.101385	101110879	annot_exons
Circ_010946	861.563	886.989	581.601	696.806	206.174	160.477	382.048	119.777	756.74	217.119	-1.80131	5.26065e-05	0.00166192	443515	one_exon
Circ_010948	1233.6	90.9732	404.592	222.978	233.664	80.2386	35.817	74.8604	488.036	106.145	-2.20095	0.0107947	0.113088	101112169	annot_exons
Circ_010955	58.7429	22.7433	25.287	55.7445	0	0	0	0	40.6294	0.001	-15.3102	0.0153528	0.146259	NA	intergenic
Circ_010963	117.486	90.9732	177.009	362.339	0	80.2386	71.6341	89.8325	186.952	60.4263	-1.62942	0.0320253	0.244002	101119255	annot_exons
Circ_010964	58.7429	45.4866	101.148	27.8722	27.4899	0	0	0	58.3124	6.87247	-3.0849	0.0136537	0.134794	101119255	annot_exons
Circ_010967	254.553	181.946	75.861	27.8722	13.7449	53.4924	23.878	0	135.058	22.7788	-2.56781	0.00889397	0.0983707	101119255	annot_exons
Circ_010968	176.229	0	126.435	0	0	0	0	0	75.6659	0.001	-16.2074	0.00964571	0.104331	101119255	one_exon
Circ_011031	0	22.7433	0	0	68.7247	106.985	59.6951	29.9442	5.68582	66.3372	3.54438	0.0156091	0.14774	101120867	annot_exons
Circ_011032	0	0	0	0	41.2348	160.477	167.146	164.693	0.001	133.388	17.0253	3.33395e-05	0.00113333	101120867	annot_exons
Circ_011033	0	0	0	0	13.7449	106.985	47.7561	44.9162	0.001	53.3505	15.7032	0.00632445	0.0761794	101120867	annot_exons
Circ_011035	0	0	0	0	27.4899	53.4924	11.939	59.8883	0.001	38.2024	15.2214	0.0198377	0.174337	101120867	annot_exons
Circ_011052	0	0	0	0	54.9798	13.3731	35.817	14.9721	0.001	29.7855	14.8623	0.0485311	0.322172	101116769	antisense
Circ_011054	137.067	22.7433	126.435	390.211	0	0	0	0	169.114	0.001	-17.3676	2.78709e-05	0.000972494	105603292	exon_intron
Circ_011059	0	0	0	0	54.9798	13.3731	59.6951	134.749	0.001	65.6992	16.0036	0.00222945	0.0337217	101103014	annot_exons
Circ_011073	0	22.7433	0	0	151.194	200.596	191.024	74.8604	5.68582	154.419	4.76334	1.3957e-05	0.000562955	101104608	annot_exons
Circ_011076	0	159.203	101.148	278.722	13.7449	26.7462	11.939	14.9721	134.768	16.8506	-2.99961	0.00499891	0.063306	101102843	annot_exons
Circ_011091	0	0	0	0	54.9798	0	35.817	74.8604	0.001	41.4143	15.3378	0.0289943	0.227428	101104610	annot_exons
Circ_011100	58.7429	45.4866	25.287	167.233	0	0	0	0	74.1875	0.001	-16.1789	0.00153492	0.02504	101109304	exon_intron
Circ_011102	0	0	0	0	41.2348	13.3731	107.451	14.9721	0.001	44.2578	15.4336	0.0208554	0.18085	101109304	exon_intron
Circ_011107	0	0	0	0	68.7247	13.3731	35.817	14.9721	0.001	33.2217	15.0198	0.035451	0.261554	101109304	exon_intron
Circ_011111	0	0	0	0	27.4899	66.8655	119.39	14.9721	0.001	57.1794	15.8032	0.00525057	0.0657356	105603294	annot_exons
Circ_011132	156.648	181.946	50.574	0	0	0	23.878	0	97.292	5.96951	-4.02664	0.00476095	0.0608475	101106630	annot_exons
Circ_011148	0	0	0	27.8722	96.2146	187.223	250.719	179.665	6.96806	178.456	4.67866	2.91778e-06	0.000150328	101111833	annot_exons
Circ_011161	0	0	0	0	123.705	93.6117	83.5731	29.9442	0.001	82.7084	16.3357	0.00015787	0.00401974	101107392	annot_exons
Circ_011174	0	0	0	0	384.859	387.82	513.378	434.19	0.001	430.062	18.7142	4.34868e-15	1.48979e-12	101107392	annot_exons
Circ_011178	0	0	0	0	54.9798	13.3731	107.451	44.9162	0.001	55.1801	15.7519	0.00434205	0.0566743	101107392	annot_exons
Circ_011179	0	0	0	0	151.194	294.208	250.719	194.637	0.001	222.69	17.7647	8.43421e-09	9.04414e-07	101107392	annot_exons
Circ_011180	0	0	0	0	178.684	227.343	119.39	149.721	0.001	168.784	17.3648	3.08517e-07	2.17023e-05	101107392	annot_exons
Circ_011190	352.457	68.2299	252.87	167.233	82.4697	133.731	71.6341	59.8883	210.198	86.9308	-1.27381	0.0462298	0.311653	101112350	annot_exons
Circ_011198	0	0	0	0	27.4899	26.7462	47.7561	14.9721	0.001	29.2411	14.8357	0.0409705	0.288404	101114817	annot_exons
Circ_011201	19.581	0	101.148	55.7445	0	0	0	0	44.1184	0.001	-15.4291	0.0392897	0.281018	101109216	annot_exons
Circ_011220	0	0	0	0	109.96	320.954	95.5121	14.9721	0.001	135.35	17.0463	0.000106854	0.00290887	NA	intergenic
Circ_011222	0	0	0	0	274.899	641.909	310.414	299.442	0.001	381.666	18.542	5.84225e-11	9.87901e-09	NA	intergenic
Circ_011240	58.7429	113.716	50.574	83.6167	0	0	47.7561	14.9721	76.6625	15.682	-2.28941	0.0175086	0.159757	443200	exon_intron
Circ_011268	234.972	477.609	733.323	529.572	27.4899	26.7462	59.6951	29.9442	493.869	35.9688	-3.77931	5.37616e-09	6.11283e-07	101101924	annot_exons
Circ_011293	39.1619	22.7433	202.296	111.489	0	0	0	0	93.9226	0.001	-16.5192	0.000506047	0.0102504	101116431	annot_exons
Circ_011320	176.229	136.46	252.87	55.7445	27.4899	26.7462	23.878	59.8883	155.326	34.5006	-2.1706	0.0031982	0.0448275	101105855	annot_exons
Circ_011321	332.876	432.123	379.305	418.084	27.4899	26.7462	47.7561	14.9721	390.597	29.2411	-3.73961	8.08071e-12	1.61486e-09	101105855	annot_exons
Circ_011322	0	0	0	0	27.4899	53.4924	0	59.8883	0.001	35.2176	15.104	0.0428605	0.296828	101106112	annot_exons
Circ_011323	58.7429	22.7433	25.287	111.489	0	0	0	0	54.5655	0.001	-15.7357	0.00898951	0.099095	101106112	annot_exons
Circ_011335	117.486	90.9732	202.296	195.106	54.9798	53.4924	71.6341	59.8883	151.465	59.9986	-1.33598	0.0309227	0.237955	101110365	exon_intron
Circ_011358	58.7429	22.7433	25.287	55.7445	0	0	0	0	40.6294	0.001	-15.3102	0.0153459	0.146246	101102016	annot_exons
Circ_011366	58.7429	90.9732	25.287	27.8722	0	0	0	0	50.7188	0.001	-15.6302	0.00736433	0.085541	101114906	annot_exons
Circ_011371	97.9048	0	50.574	139.361	0	0	11.939	0	71.96	2.98475	-4.59151	0.0038611	0.0519123	101115160	annot_exons
Circ_011386	117.486	0	202.296	167.233	0	0	35.817	14.9721	121.754	12.6973	-3.26138	0.0103327	0.109464	101115909	annot_exons
Circ_011388	1448.99	1592.03	1618.37	1282.12	357.369	361.074	417.866	404.246	1485.38	385.138	-1.94738	1.77443e-18	1.06381e-15	101115909	annot_exons
Circ_011396	215.391	386.636	1163.2	334.467	27.4899	53.4924	11.939	29.9442	524.924	30.7164	-4.09503	4.66083e-07	3.14445e-05	101116866	annot_exons
Circ_011397	137.067	45.4866	25.287	139.361	0	0	0	0	86.8004	0.001	-16.4054	0.000386014	0.00821845	101116866	annot_exons
Circ_011398	274.134	204.69	783.897	306.595	27.4899	0	0	14.9721	392.329	10.6155	-5.20782	2.39092e-08	2.21299e-06	101116866	annot_exons
Circ_011405	0	0	0	0	13.7449	40.1193	107.451	29.9442	0.001	47.8149	15.5452	0.0114742	0.118187	101117111	one_exon
Circ_011429	39.1619	68.2299	101.148	0	178.684	294.208	47.7561	239.553	52.135	190.05	1.86606	0.0226246	0.190981	101104014	annot_exons
Circ_011445	97.9048	136.46	50.574	27.8722	0	26.7462	23.878	14.9721	78.2027	16.3991	-2.2536	0.0181874	0.164078	101120113	annot_exons
Circ_011447	58.7429	45.4866	50.574	27.8722	0	0	0	14.9721	45.6689	3.74302	-3.60894	0.0348019	0.257949	101120113	annot_exons
Circ_011448	137.067	181.946	75.861	250.85	0	0	0	0	161.431	0.001	-17.3006	9.92627e-07	6.1322e-05	101120113	annot_exons
Circ_011449	0	0	0	0	54.9798	40.1193	35.817	14.9721	0.001	36.4721	15.1545	0.0245344	0.202437	101120113	annot_exons
Circ_011454	78.3239	159.203	75.861	139.361	0	0	0	14.9721	113.187	3.74302	-4.91837	1.15351e-05	0.000479943	101121886	annot_exons
Circ_011456	39.1619	68.2299	0	222.978	0	0	0	0	82.5924	0.001	-16.3337	0.00411774	0.0544743	101121886	annot_exons
Circ_011457	0	136.46	50.574	83.6167	0	0	0	0	67.6626	0.001	-16.0461	0.00662552	0.0787983	101121886	annot_exons
Circ_011463	0	0	0	0	137.449	80.2386	131.329	134.749	0.001	120.941	16.8839	1.34218e-05	0.000543027	101122138	annot_exons
Circ_011465	0	0	0	0	13.7449	26.7462	59.6951	29.9442	0.001	32.5326	14.9896	0.0295395	0.230199	101122138	annot_exons
Circ_011469	0	0	0	0	96.2146	200.596	238.78	119.777	0.001	163.842	17.3219	1.67414e-06	9.51771e-05	101122138	annot_exons
Circ_011472	0	0	0	0	206.174	133.731	95.5121	89.8325	0.001	131.312	17.0026	1.56602e-05	0.000614926	101122138	annot_exons
Circ_011475	0	45.4866	0	0	137.449	93.6117	71.6341	119.777	11.3716	105.618	3.21534	0.00157549	0.0254968	101122138	annot_exons
Circ_011476	0	0	0	0	27.4899	26.7462	35.817	29.9442	0.001	29.9993	14.8726	0.0344498	0.256275	101122138	annot_exons
Circ_011484	117.486	136.46	0	55.7445	0	0	0	0	77.4225	0.001	-16.2405	0.00214056	0.0327528	101122138	annot_exons
Circ_011506	0	0	0	0	109.96	160.477	23.878	14.9721	0.001	77.3217	16.2386	0.00139852	0.0231618	NA	intergenic
Circ_011523	97.9048	136.46	202.296	55.7445	0	0	0	0	123.101	0.001	-16.9095	1.16608e-05	0.00048441	101102181	annot_exons
Circ_011539	0	0	0	0	41.2348	120.358	35.817	149.721	0.001	86.7826	16.4051	0.000241407	0.00562551	101104937	one_exon
Circ_011547	411.2	90.9732	50.574	139.361	0	40.1193	11.939	44.9162	173.027	24.2436	-2.83532	0.0028423	0.0407706	101105443	annot_exons
Circ_011555	19.581	136.46	25.287	111.489	0	0	0	14.9721	73.2042	3.74302	-4.28965	0.0089303	0.0986601	101105691	annot_exons
Circ_011559	332.876	159.203	379.305	167.233	13.7449	0	11.939	0	259.655	6.42099	-5.33765	1.79422e-08	1.71485e-06	101106113	one_exon
Circ_011592	0	0	0	0	219.919	147.104	501.439	119.777	0.001	247.06	17.9145	5.65679e-07	3.72121e-05	101112425	annot_exons
Circ_011593	0	0	0	0	13.7449	40.1193	83.5731	59.8883	0.001	49.3314	15.5902	0.00808075	0.0919199	101112425	annot_exons
Circ_011609	19.581	0	0	83.6167	137.449	80.2386	143.268	59.8883	25.7994	105.211	2.02788	0.0282294	0.223824	101112679	annot_exons
Circ_011613	0	227.433	50.574	0	0	0	0	0	69.5017	0.001	-16.0848	0.0199774	0.175194	101113176	annot_exons
Circ_011639	39.1619	90.9732	25.287	0	563.543	1043.1	752.158	598.883	38.8555	739.421	4.2502	1.35572e-11	2.56227e-09	101116179	annot_exons
Circ_011640	0	0	0	0	27.4899	26.7462	47.7561	14.9721	0.001	29.2411	14.8357	0.040974	0.288404	101116179	annot_exons
Circ_011669	0	0	0	0	82.4697	66.8655	11.939	0	0.001	40.3185	15.2992	0.0433627	0.298659	101119509	antisense
Circ_011679	0	0	0	0	82.4697	93.6117	83.5731	74.8604	0.001	83.6287	16.3517	0.000424573	0.0088536	101115830	annot_exons
Circ_011680	176.229	0	25.287	55.7445	13.7449	0	0	0	64.315	3.43624	-4.22625	0.0344097	0.256194	101120276	annot_exons
Circ_011691	0	0	0	0	13.7449	0	59.6951	149.721	0.001	55.7902	15.7677	0.0161242	0.151381	101122310	exon_intron
Circ_011697	137.067	22.7433	227.583	0	0	13.3731	0	0	96.8483	3.34327	-4.85639	0.0074579	0.0863616	101122310	annot_exons
Circ_011699	1605.64	1296.37	1264.35	1226.38	41.2348	106.985	95.5121	359.33	1348.18	150.765	-3.16064	1.83218e-07	1.38004e-05	101122310	annot_exons
Circ_011700	0	159.203	227.583	111.489	0	0	0	0	124.569	0.001	-16.9266	0.000282401	0.0063725	101122310	exon_intron
Circ_011714	97.9048	45.4866	75.861	278.722	0	0	0	0	124.494	0.001	-16.9257	6.19059e-05	0.00187488	101122556	antisense
Circ_011718	1370.67	1546.54	1491.93	1588.72	2886.44	4520.11	3104.14	3578.33	1499.47	3522.25	1.23205	8.10501e-08	6.6605e-06	101122556	annot_exons
Circ_011722	372.038	545.839	126.435	501.7	137.449	200.596	59.6951	44.9162	386.503	110.664	-1.80429	0.00574835	0.0706597	101117113	annot_exons
Circ_011732	58.7429	45.4866	151.722	83.6167	151.194	240.716	346.231	104.805	84.8921	210.737	1.31174	0.0478644	0.319326	101118138	annot_exons
Circ_011738	78.3239	0	75.861	0	137.449	66.8655	155.207	209.609	38.5462	142.283	1.8841	0.0294858	0.229984	NA	intergenic
Circ_011741	0	181.946	227.583	418.084	0	0	0	0	206.903	0.001	-17.6586	4.94374e-05	0.00158844	NA	intergenic
Circ_011745	0	22.7433	0	167.233	494.818	575.043	573.073	658.771	47.4942	575.426	3.59881	5.72619e-06	0.000266404	NA	intergenic
Circ_011746	0	0	0	0	13.7449	133.731	23.878	74.8604	0.001	61.5536	15.9096	0.00471766	0.0604405	NA	intergenic
Circ_011756	0	22.7433	0	0	109.96	93.6117	131.329	104.805	5.68582	109.926	4.27302	0.000167218	0.00420499	101102015	annot_exons
Circ_011774	0	0	0	0	0	93.6117	107.451	74.8604	0.001	68.9808	16.0739	0.00216203	0.0330047	NA	intergenic
Circ_011783	19.581	0	75.861	27.8722	137.449	106.985	274.597	74.8604	30.8286	148.473	2.26786	0.011191	0.116058	101121714	one_exon
Circ_011795	39.1619	136.46	227.583	111.489	13.7449	13.3731	0	0	128.673	6.77951	-4.24639	0.000130166	0.00344398	101122467	exon_intron
Circ_011810	841.982	409.379	632.175	668.934	192.429	213.97	274.597	179.665	638.117	215.165	-1.56838	7.34181e-05	0.00212124	101102677	annot_exons
Circ_011811	1194.44	295.663	682.749	975.528	329.879	227.343	238.78	284.469	787.095	270.118	-1.54295	0.00247987	0.0366684	101102677	exon_intron
Circ_011816	39.1619	45.4866	0	111.489	0	0	0	0	49.0344	0.001	-15.5815	0.0238308	0.197995	101102677	intronic
Circ_011818	0	0	0	0	96.2146	106.985	11.939	59.8883	0.001	68.7567	16.0692	0.0012886	0.0216924	101102937	annot_exons
Circ_011821	0	0	25.287	0	192.429	106.985	214.902	209.609	6.32175	180.981	4.83937	1.01778e-06	6.24374e-05	101103188	annot_exons
Circ_011823	78.3239	45.4866	126.435	27.8722	329.879	133.731	191.024	89.8325	69.5294	186.117	1.42051	0.0428844	0.296916	101103188	annot_exons
Circ_011827	0	0	0	0	164.939	267.462	119.39	134.749	0.001	171.635	17.389	6.05344e-07	3.95256e-05	101103188	annot_exons
Circ_011834	19.581	0	0	27.8722	247.409	40.1193	71.6341	104.805	11.8633	115.992	3.28944	0.00370919	0.0504254	101103188	annot_exons
Circ_011842	0	0	0	0	164.939	80.2386	155.207	44.9162	0.001	111.325	16.7644	0.000139605	0.0036318	101108783	annot_exons
Circ_011844	0	0	0	0	41.2348	13.3731	71.6341	14.9721	0.001	35.3035	15.1075	0.0352282	0.260377	101108783	annot_exons
Circ_011861	0	0	0	0	68.7247	40.1193	23.878	14.9721	0.001	36.9235	15.1723	0.0197268	0.174059	101108783	annot_exons
Circ_011862	0	0	0	0	13.7449	53.4924	11.939	74.8604	0.001	38.5092	15.2329	0.0269899	0.216535	101108783	annot_exons
Circ_011869	0	0	0	0	27.4899	53.4924	47.7561	44.9162	0.001	43.4136	15.4059	0.00802926	0.091571	101102429	annot_exons
Circ_011889	176.229	272.92	25.287	111.489	54.9798	53.4924	35.817	44.9162	146.481	47.3014	-1.63076	0.0347981	0.257949	101109307	annot_exons
Circ_011890	176.229	272.92	25.287	111.489	0	53.4924	11.939	14.9721	146.481	20.1009	-2.86538	0.00341122	0.0472112	101109307	annot_exons
Circ_011901	0	0	75.861	167.233	0	0	0	0	60.7736	0.001	-15.8912	0.0300143	0.233348	101103929	annot_exons
Circ_011906	19.581	113.716	25.287	55.7445	0	0	0	14.9721	53.5822	3.74302	-3.83948	0.0384038	0.277017	494191	exon_intron
Circ_011907	313.295	363.893	1289.64	752.55	27.4899	13.3731	0	89.8325	679.844	32.6739	-4.37899	3.76259e-07	2.60508e-05	494191	annot_exons
Circ_011908	0	0	0	0	54.9798	133.731	47.7561	0	0.001	59.1167	15.8513	0.00652266	0.0779262	101110627	annot_exons
Circ_011915	176.229	90.9732	25.287	27.8722	0	0	0	0	80.0903	0.001	-16.2893	0.000943101	0.0167982	101111133	exon_intron
Circ_011916	1057.37	796.015	556.314	724.678	371.114	240.716	417.866	404.246	783.595	358.485	-1.12819	0.00197037	0.0306104	101111133	annot_exons
Circ_011917	156.648	227.433	126.435	83.6167	27.4899	66.8655	59.6951	89.8325	148.533	60.9707	-1.2846	0.0396741	0.283187	101111133	annot_exons
Circ_011937	0	0	0	0	82.4697	26.7462	35.817	14.9721	0.001	40.0013	15.2878	0.0213192	0.183424	101111399	annot_exons
Circ_011941	58.7429	68.2299	101.148	83.6167	27.4899	0	23.878	0	77.9344	12.842	-2.60139	0.00438997	0.0571866	101112428	annot_exons
Circ_011943	19.581	45.4866	252.87	55.7445	0	13.3731	35.817	14.9721	93.4205	16.0406	-2.54202	0.0241036	0.19981	101112428	annot_exons
Circ_011945	0	0	0	0	54.9798	0	71.6341	29.9442	0.001	39.1395	15.2563	0.0305216	0.235937	NA	intergenic
Circ_011956	39.1619	22.7433	0	111.489	0	0	0	0	43.3485	0.001	-15.4037	0.0389519	0.279266	101113179	annot_exons
Circ_011978	58.7429	45.4866	75.861	111.489	0	0	35.817	0	72.8949	8.95426	-3.02517	0.0160173	0.150631	101106631	annot_exons
Circ_011982	58.7429	204.69	101.148	27.8722	0	13.3731	0	14.9721	98.1132	7.08629	-3.79134	0.0011423	0.0196945	101106631	annot_exons
Circ_011983	0	90.9732	25.287	83.6167	0	0	0	0	49.9692	0.001	-15.6088	0.020482	0.178334	101106631	annot_exons
Circ_011984	19.581	90.9732	177.009	0	0	0	0	0	71.8908	0.001	-16.1335	0.00761693	0.0878177	101106631	annot_exons
Circ_012006	0	22.7433	75.861	0	178.684	80.2386	95.5121	59.8883	24.6511	103.581	2.07103	0.0302367	0.234316	101108344	annot_exons
Circ_012021	117.486	68.2299	50.574	0	426.093	561.67	358.17	389.274	59.0724	433.802	2.87648	1.30887e-06	7.74141e-05	101109394	annot_exons
Circ_012023	0	68.2299	75.861	83.6167	137.449	120.358	238.78	209.609	56.9269	176.549	1.63289	0.0147105	0.142181	101109832	annot_exons
Circ_012029	0	0	0	0	27.4899	53.4924	11.939	29.9442	0.001	30.7164	14.9067	0.0443168	0.302832	101109832	annot_exons
Circ_012036	0	0	0	0	54.9798	93.6117	0	14.9721	0.001	40.8909	15.3195	0.0407994	0.288404	101115235	annot_exons
Circ_012038	19.581	0	0	0	371.114	748.893	573.073	658.771	4.89524	587.963	6.9082	2.21612e-14	6.79757e-12	101115235	annot_exons
Circ_012039	0	0	0	0	41.2348	53.4924	47.7561	0	0.001	35.6208	15.1204	0.0379376	0.274979	101115235	annot_exons
Circ_012042	0	0	0	55.7445	109.96	254.089	107.451	44.9162	13.9361	129.104	3.21163	0.00471748	0.0604405	101110880	annot_exons
Circ_012043	0	0	0	0	82.4697	120.358	23.878	29.9442	0.001	64.1624	15.9694	0.00192407	0.0300859	101110880	annot_exons
Circ_012048	39.1619	68.2299	227.583	139.361	13.7449	0	0	14.9721	118.584	7.17926	-4.04593	0.000338497	0.00741015	NA	intergenic
Circ_012050	0	0	25.287	0	68.7247	13.3731	131.329	44.9162	6.32175	64.5858	3.35282	0.0292876	0.229116	NA	intergenic
Circ_012053	195.81	250.176	0	139.361	0	0	11.939	44.9162	146.337	14.2138	-3.36393	0.00548968	0.0680509	101117282	annot_exons
Circ_012061	19.581	0	0	0	41.2348	66.8655	107.451	104.805	4.89524	80.089	4.03215	0.00302625	0.0430347	105603383	exon_intron
Circ_012084	0	22.7433	0	0	54.9798	13.3731	143.268	29.9442	5.68582	60.3913	3.4089	0.0483754	0.321349	101115658	annot_exons
Circ_012088	0	0	0	0	109.96	40.1193	155.207	14.9721	0.001	80.0645	16.2889	0.00068828	0.0129564	101115658	annot_exons
Circ_012089	19.581	0	0	0	137.449	66.8655	71.6341	89.8325	4.89524	91.4454	4.22346	0.00122526	0.0208524	101115658	annot_exons
Circ_012090	0	0	0	0	54.9798	0	71.6341	44.9162	0.001	42.8825	15.3881	0.0193403	0.172241	101115658	annot_exons
Circ_012097	19.581	0	0	0	109.96	53.4924	23.878	14.9721	4.89524	50.5755	3.36899	0.0309035	0.237896	101115658	annot_exons
Circ_012119	0	0	0	0	13.7449	53.4924	71.6341	14.9721	0.001	38.4609	15.2311	0.024057	0.199515	101120870	annot_exons
Circ_012121	97.9048	113.716	177.009	139.361	0	40.1193	71.6341	74.8604	131.998	46.6534	-1.50046	0.0323802	0.245871	101118480	annot_exons
Circ_012123	0	272.92	126.435	55.7445	27.4899	26.7462	23.878	14.9721	113.775	23.2715	-2.28954	0.0352188	0.260377	101118480	annot_exons
Circ_012151	19.581	22.7433	50.574	55.7445	0	0	0	0	37.1607	0.001	-15.1815	0.0250102	0.20572	NA	intergenic
Circ_012164	0	0	0	0	219.919	53.4924	286.536	344.358	0.001	226.076	17.7865	1.58907e-06	9.07319e-05	NA	intergenic
Circ_012188	0	0	0	0	96.2146	13.3731	131.329	0	0.001	60.2292	15.8782	0.0110521	0.115053	101113628	annot_exons
Circ_012205	0	0	0	0	82.4697	160.477	119.39	74.8604	0.001	109.299	16.7379	6.86203e-05	0.00202024	NA	intergenic
Circ_012215	0	0	0	0	82.4697	13.3731	95.5121	29.9442	0.001	55.3248	15.7556	0.00481252	0.0614173	NA	intergenic
Circ_012224	234.972	181.946	252.87	250.85	13.7449	0	47.7561	0	230.16	15.3753	-3.90395	2.44453e-07	1.77155e-05	101114394	annot_exons
Circ_012225	137.067	45.4866	151.722	250.85	0	26.7462	23.878	0	146.281	12.6561	-3.53085	0.000191019	0.00466131	101114394	annot_exons
Circ_012227	78.3239	227.433	126.435	55.7445	27.4899	53.4924	47.7561	0	121.984	32.1846	-1.92225	0.0220363	0.187939	101114394	exon_intron
Circ_012251	0	0	0	0	54.9798	13.3731	35.817	74.8604	0.001	44.7576	15.4498	0.0121575	0.123823	NA	intergenic
Circ_012254	293.715	386.636	379.305	473.828	13.7449	0	23.878	29.9442	383.371	16.8918	-4.50435	8.55333e-13	1.96199e-10	101116869	annot_exons
Circ_012262	97.9048	204.69	0	55.7445	41.2348	0	0	14.9721	89.5847	14.0517	-2.67251	0.0340177	0.254479	101117623	annot_exons
Circ_012265	1292.34	1637.52	1365.5	2229.78	467.328	989.609	835.731	628.827	1631.28	730.374	-1.1593	0.00159295	0.0257479	101117623	annot_exons
Circ_012269	58.7429	22.7433	0	27.8722	233.664	294.208	274.597	149.721	27.3396	238.048	3.12219	8.95226e-06	0.000389047	101106117	one_exon
Circ_012282	0	0	0	0	54.9798	40.1193	35.817	59.8883	0.001	47.7011	15.5417	0.0046916	0.0601799	101119080	annot_exons
Circ_012303	19.581	45.4866	50.574	27.8722	0	0	0	0	35.8785	0.001	-15.1308	0.0232634	0.195	101107141	annot_exons
Circ_012313	58.7429	0	25.287	83.6167	0	0	0	0	41.9117	0.001	-15.3551	0.0338607	0.253847	101107640	annot_exons
Circ_012325	78.3239	113.716	0	0	0	0	0	0	48.0101	0.001	-15.551	0.0364455	0.266832	101107905	annot_exons
Circ_012326	156.648	45.4866	202.296	83.6167	0	0	0	0	122.012	0.001	-16.8967	2.16701e-05	0.000792278	101107905	annot_exons
Circ_012356	0	0	0	0	82.4697	80.2386	59.6951	0	0.001	55.6008	15.7628	0.00618381	0.0747241	101108960	annot_exons
Circ_012360	0	0	0	0	192.429	200.596	214.902	269.497	0.001	219.356	17.7429	1.57667e-09	2.02883e-07	101108960	annot_exons
Circ_012365	137.067	159.203	101.148	167.233	54.9798	26.7462	11.939	89.8325	141.163	45.8744	-1.6216	0.0182297	0.164302	101109490	annot_exons
Circ_012372	137.067	90.9732	126.435	167.233	0	0	0	119.777	130.427	29.9442	-2.1229	0.0333414	0.251084	101104275	annot_exons
Circ_012373	274.134	272.92	151.722	195.106	0	26.7462	0	29.9442	223.47	14.1726	-3.97891	1.09209e-07	8.70299e-06	101104275	annot_exons
Circ_012374	117.486	386.636	202.296	167.233	0	0	0	0	218.413	0.001	-17.7367	5.49708e-08	4.71934e-06	101104275	annot_exons
Circ_012375	39.1619	22.7433	0	111.489	0	0	0	0	43.3485	0.001	-15.4037	0.0389486	0.279266	101104275	exon_intron
Circ_012384	528.686	318.406	379.305	139.361	151.194	147.104	71.6341	29.9442	341.44	99.9692	-1.77208	0.00519139	0.0652	101104693	annot_exons
Circ_012409	0	68.2299	50.574	27.8722	0	0	0	0	36.669	0.001	-15.1623	0.0471812	0.316148	101105365	annot_exons
Circ_012411	39.1619	0	0	0	96.2146	0	95.5121	89.8325	9.79048	70.3898	2.84591	0.0274887	0.219535	NA	intergenic
Circ_012426	19.581	22.7433	0	0	329.879	120.358	155.207	239.553	10.5811	211.249	4.31939	3.4429e-06	0.000172662	101107904	annot_exons
Circ_012465	156.648	272.92	101.148	167.233	41.2348	0	11.939	44.9162	174.487	24.5225	-2.83094	0.000229852	0.00541363	101116353	exon_intron
Circ_012466	78.3239	136.46	50.574	167.233	41.2348	26.7462	11.939	59.8883	108.148	34.9521	-1.62955	0.0360475	0.264727	101116353	antisense
Circ_012494	176.229	363.893	50.574	83.6167	0	0	11.939	0	168.578	2.98475	-5.81966	7.41513e-06	0.000330971	101122896	annot_exons
Circ_012514	0	0	0	0	123.705	13.3731	35.817	59.8883	0.001	58.1957	15.8286	0.00522761	0.0655102	101107555	annot_exons
Circ_012525	39.1619	136.46	101.148	27.8722	453.583	481.431	417.866	104.805	76.1605	364.421	2.25849	0.00134241	0.0224387	101113439	annot_exons
Circ_012527	0	159.203	0	27.8722	343.624	187.223	310.414	269.497	46.7688	277.69	2.56985	0.00268559	0.0391832	101113439	annot_exons
Circ_012539	0	45.4866	0	0	82.4697	53.4924	23.878	134.749	11.3716	73.6472	2.69519	0.0316638	0.242104	101121808	annot_exons
Circ_012546	39.1619	113.716	151.722	111.489	2652.78	2621.13	3820.48	2485.36	104.022	2894.94	4.79857	1.44012e-26	2.23464e-23	NA	intergenic
Circ_012547	39.1619	68.2299	25.287	27.8722	4618.3	4988.16	6160.53	4701.23	40.1378	5117.06	6.99421	4.97971e-57	4.37866e-53	NA	intergenic
Circ_012551	117.486	0	25.287	55.7445	54.9798	254.089	155.207	179.665	49.6293	160.985	1.69766	0.046682	0.314059	101114649	annot_exons
Circ_012561	0	0	0	0	27.4899	66.8655	23.878	29.9442	0.001	37.0444	15.177	0.0169305	0.156376	105603559	antisense
Circ_012571	78.3239	0	50.574	0	219.919	200.596	95.5121	224.581	32.2245	185.152	2.52248	0.00195962	0.0305152	101104278	annot_exons
Circ_012581	0	0	0	0	82.4697	13.3731	71.6341	0	0.001	41.8692	15.3536	0.0311992	0.239664	101119512	annot_exons
Circ_012586	137.067	250.176	328.731	334.467	13.7449	40.1193	214.902	29.9442	262.61	74.6777	-1.81417	0.0207743	0.180384	101120529	annot_exons
Circ_012616	372.038	386.636	252.87	278.722	810.952	1176.83	1623.71	1048.05	322.567	1164.88	1.85252	1.08721e-06	6.57785e-05	101122729	one_exon
Circ_012620	0	0	0	0	27.4899	0	71.6341	44.9162	0.001	36.0101	15.1361	0.0439521	0.301225	101123504	exon_intron
Circ_012628	391.619	227.433	682.749	362.339	41.2348	53.4924	95.5121	29.9442	416.035	55.0459	-2.918	1.68674e-06	9.56873e-05	101103190	annot_exons
Circ_012647	0	45.4866	0	0	96.2146	120.358	250.719	29.9442	11.3716	124.309	3.45042	0.00336169	0.0466481	101108865	exon_intron
Circ_012652	0	0	25.287	0	27.4899	53.4924	59.6951	89.8325	6.32175	57.6275	3.18836	0.0327151	0.247332	101109126	annot_exons
Circ_012659	195.81	386.636	50.574	55.7445	13.7449	0	11.939	0	172.191	6.42099	-4.74507	7.80417e-05	0.00223525	101109650	intronic
Circ_012660	39.1619	318.406	252.87	111.489	13.7449	0	0	14.9721	180.482	7.17926	-4.65187	2.90262e-05	0.00100483	101109650	antisense
Circ_012676	0	0	0	0	151.194	26.7462	23.878	14.9721	0.001	54.1977	15.7259	0.0127894	0.128718	100145880	annot_exons
Circ_012677	0	45.4866	75.861	27.8722	0	0	0	0	37.305	0.001	-15.1871	0.0479181	0.31945	NA	intergenic
Circ_012680	215.391	318.406	1517.22	111.489	41.2348	147.104	179.085	239.553	540.627	151.744	-1.83299	0.0346492	0.257323	101113540	annot_exons
Circ_012687	19.581	45.4866	0	195.106	0	0	0	0	65.0433	0.001	-15.9891	0.013362	0.132909	100913154	exon_intron
Circ_012696	0	22.7433	0	0	96.2146	26.7462	71.6341	29.9442	5.68582	56.1348	3.30345	0.0403385	0.286353	101111940	annot_exons
Circ_012708	0	0	0	0	82.4697	53.4924	298.475	14.9721	0.001	112.352	16.7777	0.000403827	0.00853571	101121064	annot_exons
Circ_012716	0	22.7433	227.583	55.7445	0	26.7462	0	0	76.5177	6.68655	-3.51646	0.0298005	0.231958	101115515	annot_exons
Circ_012726	0	0	0	0	41.2348	26.7462	23.878	59.8883	0.001	37.9368	15.2113	0.01541	0.146355	101116545	annot_exons
Circ_012732	19.581	0	0	0	54.9798	80.2386	11.939	44.9162	4.89524	48.0184	3.29414	0.0332651	0.250705	101116809	annot_exons
Circ_012738	58.7429	22.7433	25.287	55.7445	329.879	227.343	274.597	314.414	40.6294	286.558	2.81823	1.7685e-06	9.94697e-05	101116809	annot_exons
Circ_012740	0	0	0	27.8722	54.9798	147.104	59.6951	134.749	6.96806	99.1319	3.83052	0.00117003	0.0200713	101116809	annot_exons
Circ_012756	19.581	113.716	25.287	0	0	0	0	0	39.6461	0.001	-15.2749	0.045028	0.305738	443157	annot_exons
Circ_012771	0	0	0	0	0	40.1193	83.5731	74.8604	0.001	49.6382	15.5992	0.0140096	0.137485	NA	intergenic
Circ_012780	0	0	0	0	0	40.1193	59.6951	74.8604	0.001	43.6687	15.4143	0.0197787	0.17428	101102699	antisense
Circ_012800	0	0	151.722	55.7445	0	0	0	0	51.8666	0.001	-15.6625	0.0479881	0.319604	101108805	annot_exons
Circ_012810	0	45.4866	0	0	109.96	66.8655	131.329	224.581	11.3716	133.184	3.54991	0.000689285	0.0129598	101110732	exon_intron
Circ_012815	176.229	90.9732	151.722	83.6167	962.146	1109.97	1086.45	868.38	125.635	1006.74	3.00237	1.82074e-15	6.76469e-13	101110732	one_exon
Circ_012816	0	0	0	0	41.2348	66.8655	23.878	44.9162	0.001	44.2236	15.4325	0.00906747	0.0997459	101110732	exon_intron
Circ_012819	19.581	90.9732	25.287	55.7445	0	0	0	0	47.8964	0.001	-15.5476	0.012967	0.130159	101110995	annot_exons
Circ_012820	137.067	68.2299	126.435	27.8722	13.7449	0	0	0	89.901	3.43624	-4.70944	0.000192861	0.00468892	101110995	annot_exons
Circ_012838	567.848	68.2299	151.722	27.8722	508.563	922.744	465.622	733.632	203.918	657.64	1.68931	0.0272265	0.21777	101111252	annot_exons
Circ_012841	352.457	113.716	429.879	418.084	824.697	869.251	656.646	598.883	328.534	737.369	1.16634	0.0105114	0.110823	101111252	annot_exons
Circ_012846	0	90.9732	177.009	55.7445	27.4899	0	0	0	80.9317	6.87247	-3.5578	0.0125364	0.126947	101121153	annot_exons
Circ_012856	97.9048	136.46	126.435	222.978	27.4899	0	0	0	145.944	6.87247	-4.40845	9.39596e-06	0.000403674	101112375	annot_exons
Circ_012861	19.581	22.7433	25.287	0	68.7247	80.2386	107.451	164.693	16.9028	105.277	2.63885	0.00318368	0.0446889	101112375	annot_exons
Circ_012864	97.9048	0	50.574	55.7445	0	0	0	0	51.0558	0.001	-15.6398	0.0155931	0.147695	443346	one_exon
Circ_012884	234.972	45.4866	151.722	27.8722	41.2348	40.1193	11.939	44.9162	115.013	34.5523	-1.73494	0.0392993	0.281018	101123447	annot_exons
Circ_012887	97.9048	22.7433	75.861	55.7445	0	0	0	29.9442	63.0634	7.48604	-3.07453	0.00986616	0.105969	101101872	annot_exons
Circ_012896	19.581	0	0	0	164.939	13.3731	191.024	89.8325	4.89524	114.792	4.5515	0.00236026	0.0352614	NA	intergenic
Circ_012897	78.3239	0	0	0	274.899	106.985	202.963	149.721	19.581	183.642	3.22937	0.000567531	0.0112141	NA	intergenic
Circ_012899	0	0	0	0	54.9798	66.8655	23.878	29.9442	0.001	43.9169	15.4225	0.00994306	0.106578	NA	intergenic
Circ_012905	19.581	0	0	0	178.684	133.731	179.085	134.749	4.89524	156.562	4.99921	2.60867e-06	0.000137904	NA	intergenic
Circ_012908	0	0	0	0	164.939	40.1193	23.878	14.9721	0.001	60.9772	15.896	0.00650339	0.0777665	NA	intergenic
Circ_012918	176.229	45.4866	0	83.6167	0	0	0	0	76.333	0.001	-16.22	0.00299396	0.0426215	101102373	intronic
Circ_012922	0	0	0	0	13.7449	26.7462	71.6341	74.8604	0.001	46.7464	15.5126	0.00952658	0.103568	101116958	annot_exons
Circ_012941	548.267	841.502	252.87	362.339	0	13.3731	0	0	501.245	3.34327	-7.22811	1.64693e-12	3.59044e-10	101103379	annot_exons
Circ_012945	0	0	0	0	316.134	187.223	83.5731	74.8604	0.001	165.448	17.336	1.87285e-05	0.00070376	101103627	exon_intron
Circ_012949	0	0	0	0	192.429	106.985	47.7561	134.749	0.001	120.48	16.8784	6.98423e-05	0.00204552	101120547	antisense
Circ_012950	0	0	0	0	137.449	53.4924	35.817	89.8325	0.001	79.1478	16.2723	0.000293677	0.00658191	101120547	intronic
Circ_012951	39.1619	0	0	0	137.449	120.358	95.5121	149.721	9.79048	125.76	3.68315	0.000206937	0.00498064	NA	intergenic
Circ_012956	19.581	159.203	50.574	55.7445	316.134	240.716	346.231	464.134	71.2756	341.804	2.26169	0.000217904	0.00520189	101123182	annot_exons
Circ_012957	0	0	0	27.8722	96.2146	80.2386	167.146	44.9162	6.96806	97.1289	3.80107	0.00126542	0.021343	101123182	annot_exons
Circ_012958	156.648	136.46	227.583	55.7445	0	0	0	0	144.109	0.001	-17.1368	2.60256e-06	0.000137857	101123182	annot_exons
Circ_012959	39.1619	22.7433	227.583	0	13.7449	13.3731	11.939	0	72.3721	9.76427	-2.88985	0.0463611	0.312457	101123182	annot_exons
Circ_012960	39.1619	22.7433	0	0	68.7247	133.731	71.6341	89.8325	15.4763	90.9806	2.5555	0.00874899	0.0972155	101123182	annot_exons
Circ_012965	0	113.716	25.287	27.8722	0	0	0	0	41.7189	0.001	-15.3484	0.0441862	0.302324	101102870	annot_exons
Circ_012976	78.3239	68.2299	0	83.6167	13.7449	13.3731	0	0	57.5426	6.77951	-3.08538	0.0276	0.220158	101105721	annot_exons
Circ_012981	0	0	0	0	27.4899	106.985	107.451	74.8604	0.001	79.1965	16.2731	0.000243357	0.00565097	105601937	exon_intron
Circ_012990	0	0	0	0	27.4899	13.3731	23.878	89.8325	0.001	38.6434	15.2379	0.0260313	0.211371	101110308	one_exon
Circ_012996	0	0	0	0	27.4899	66.8655	95.5121	14.9721	0.001	51.2099	15.6441	0.00660273	0.0785981	101111349	annot_exons
Circ_013003	469.943	272.92	227.583	445.956	68.7247	240.716	83.5731	119.777	354.1	128.198	-1.46579	0.00834449	0.0939652	101111349	annot_exons
Circ_013004	939.886	1091.68	1289.64	891.911	426.093	267.462	322.353	374.302	1053.28	347.553	-1.59958	1.03909e-07	8.30608e-06	101111349	annot_exons
Circ_013010	58.7429	68.2299	177.009	139.361	13.7449	66.8655	35.817	29.9442	110.836	36.5929	-1.59879	0.0483116	0.321091	101108189	annot_exons
Circ_013020	78.3239	90.9732	25.287	0	0	13.3731	0	14.9721	48.646	7.08629	-2.77922	0.0475883	0.318128	101110906	annot_exons
Circ_013025	0	0	0	0	357.369	548.297	573.073	314.414	0.001	448.288	18.7741	7.61586e-14	2.02928e-11	101113133	annot_exons
Circ_013028	97.9048	113.716	25.287	83.6167	0	0	0	14.9721	80.1313	3.74302	-4.42009	0.000376477	0.00807405	101111157	annot_exons
Circ_013029	0	272.92	0	0	0	0	0	0	68.2299	0.001	-16.0581	0.0429939	0.29744	101111157	antisense
Circ_013044	0	45.4866	126.435	55.7445	13.7449	0	0	0	56.9165	3.43624	-4.04995	0.0452291	0.306601	101111688	annot_exons
Circ_013046	39.1619	22.7433	0	83.6167	0	0	0	0	36.3805	0.001	-15.1509	0.0499471	0.3292	101111688	annot_exons
Circ_013048	234.972	113.716	75.861	83.6167	0	0	0	0	127.041	0.001	-16.9549	7.91438e-06	0.00035088	101112193	annot_exons
Circ_013052	117.486	136.46	202.296	83.6167	0	13.3731	23.878	29.9442	134.965	16.7988	-3.00615	0.000213865	0.00511473	101112700	annot_exons
Circ_013054	489.524	136.46	404.592	306.595	123.705	66.8655	167.146	89.8325	334.293	111.887	-1.57907	0.00506267	0.0638376	101112700	annot_exons
Circ_013063	0	45.4866	25.287	0	247.409	200.596	358.17	209.609	17.6934	253.946	3.84324	7.41677e-07	4.73721e-05	101114240	annot_exons
Circ_013068	19.581	22.7433	0	55.7445	769.717	454.685	596.951	299.442	24.5172	530.199	4.43467	1.03928e-09	1.42918e-07	101115255	annot_exons
Circ_013082	313.295	341.149	202.296	529.572	109.96	26.7462	71.6341	149.721	346.578	89.5152	-1.95298	0.000817567	0.0148845	101115757	annot_exons
Circ_013086	391.619	159.203	25.287	139.361	27.4899	26.7462	0	14.9721	178.868	17.302	-3.36988	0.000475809	0.00974485	101115757	annot_exons
Circ_013088	39.1619	22.7433	0	111.489	0	0	0	0	43.3485	0.001	-15.4037	0.0389399	0.279266	101115757	exon_intron
Circ_013094	0	181.946	126.435	306.595	384.859	588.416	477.561	299.442	153.744	437.569	1.50898	0.033542	0.252011	101115757	one_exon
Circ_013095	97.9048	68.2299	151.722	27.8722	27.4899	0	0	29.9442	86.4323	14.3585	-2.58966	0.012144	0.123734	101115757	annot_exons
Circ_013098	763.658	363.893	354.018	473.828	0	40.1193	35.817	14.9721	488.849	22.7271	-4.4269	7.18867e-11	1.19264e-08	101116015	annot_exons
Circ_013099	39.1619	0	50.574	55.7445	0	0	0	0	36.3701	0.001	-15.1505	0.0415311	0.290983	101116015	exon_intron
Circ_013101	195.81	45.4866	126.435	139.361	0	0	0	0	126.773	0.001	-16.9519	1.02596e-05	0.000435109	101116015	annot_exons
Circ_013102	117.486	22.7433	101.148	139.361	0	0	0	0	95.1846	0.001	-16.5384	0.000154377	0.00394221	101116015	annot_exons
Circ_013103	97.9048	68.2299	25.287	55.7445	0	0	11.939	0	61.7916	2.98475	-4.37173	0.00220366	0.0334275	101116015	annot_exons
Circ_013104	450.362	181.946	101.148	167.233	0	0	59.6951	59.8883	225.173	29.8958	-2.91301	0.000739393	0.0137452	101116015	annot_exons
Circ_013108	176.229	0	0	222.978	714.737	1150.09	978.999	419.218	99.8016	815.76	3.03101	0.000910576	0.0162848	101118416	one_exon
Circ_013110	489.524	341.149	379.305	585.317	68.7247	80.2386	59.6951	344.358	448.824	138.254	-1.69883	0.00769379	0.0884778	101118416	annot_exons
Circ_013111	274.134	409.379	151.722	836.167	151.194	106.985	107.451	104.805	417.85	117.609	-1.82899	0.00380439	0.0512543	101118416	annot_exons
Circ_013113	39.1619	0	50.574	55.7445	0	0	0	0	36.3701	0.001	-15.1505	0.0415201	0.290982	101118416	annot_exons
Circ_013122	0	136.46	75.861	111.489	13.7449	0	0	14.9721	80.9524	7.17926	-3.49517	0.00696242	0.0818821	101119016	annot_exons
Circ_013127	117.486	68.2299	75.861	27.8722	0	0	0	14.9721	72.3622	3.74302	-4.27296	0.00357623	0.0490574	100302096	annot_exons
Circ_013133	0	0	0	0	82.4697	106.985	23.878	239.553	0.001	113.221	16.7888	0.000103221	0.00282454	100302096	annot_exons
Circ_013134	0	0	0	0	27.4899	13.3731	11.939	134.749	0.001	46.8877	15.5169	0.0222567	0.189025	100302096	exon_intron
Circ_013157	19.581	22.7433	25.287	27.8722	494.818	494.805	334.292	329.386	23.8709	413.325	4.11395	9.09987e-11	1.48176e-08	101101952	one_exon
Circ_013171	0	68.2299	75.861	0	178.684	320.954	95.5121	164.693	36.0227	189.961	2.39872	0.00577811	0.0708275	101102619	annot_exons
Circ_013172	39.1619	22.7433	0	0	151.194	120.358	83.5731	209.609	15.4763	141.184	3.18944	0.000416927	0.00874949	101102619	annot_exons
Circ_013192	137.067	568.582	404.592	222.978	27.4899	13.3731	11.939	44.9162	333.305	24.4296	-3.77014	1.8727e-06	0.000104661	101110299	annot_exons
Circ_013195	0	0	0	0	13.7449	40.1193	83.5731	44.9162	0.001	45.5884	15.4764	0.00865217	0.096413	NA	intergenic
Circ_013198	0	45.4866	50.574	0	82.4697	173.85	47.7561	74.8604	24.0152	94.7341	1.97994	0.0445696	0.303963	101111427	annot_exons
Circ_013202	0	0	0	0	41.2348	26.7462	47.7561	29.9442	0.001	36.4203	15.1525	0.0210334	0.181673	101111427	annot_exons
Circ_013205	274.134	136.46	404.592	195.106	96.2146	66.8655	95.5121	134.749	252.573	98.3352	-1.36092	0.0141891	0.138872	101111427	annot_exons
Circ_013214	156.648	45.4866	0	167.233	0	0	11.939	14.9721	92.3419	6.72777	-3.77878	0.00465547	0.0598765	101119284	annot_exons
Circ_013216	58.7429	45.4866	151.722	0	0	0	11.939	0	63.9879	2.98475	-4.42211	0.006064	0.073512	101119284	annot_exons
Circ_013231	489.524	45.4866	75.861	222.978	27.4899	53.4924	59.6951	0	208.462	35.1693	-2.5674	0.0058157	0.071123	NA	intergenic
Circ_013243	78.3239	90.9732	126.435	111.489	0	13.3731	0	0	101.805	3.34327	-4.92841	2.27894e-05	0.000826909	101115429	annot_exons
Circ_013253	19.581	68.2299	0	83.6167	0	0	0	0	42.8569	0.001	-15.3872	0.0359961	0.264463	101122334	annot_exons
Circ_013257	176.229	45.4866	75.861	55.7445	219.919	213.97	191.024	179.665	88.3302	201.144	1.18725	0.0422731	0.293995	101119877	one_exon
Circ_013260	0	0	0	0	1676.88	1658.26	1181.96	1347.49	0.001	1466.15	20.4836	2.80329e-30	7.3948e-27	105607498	one_exon
Circ_013264	0	0	0	0	82.4697	40.1193	35.817	0	0.001	39.6015	15.2733	0.0313263	0.24029	101123612	annot_exons
Circ_013269	0	0	0	0	82.4697	93.6117	119.39	14.9721	0.001	77.6109	16.244	0.000414439	0.0087239	101123612	annot_exons
Circ_013274	0	0	0	0	41.2348	13.3731	119.39	44.9162	0.001	54.7286	15.74	0.00527603	0.0658979	101123612	annot_exons
Circ_013282	0	0	0	0	0	0	286.536	164.693	0.001	112.807	16.7835	0.00424377	0.0556947	NA	intergenic
Circ_013284	0	0	0	0	96.2146	66.8655	35.817	29.9442	0.001	57.2103	15.804	0.0026725	0.039057	101102295	antisense
Circ_013286	0	0	0	0	82.4697	66.8655	11.939	14.9721	0.001	44.0616	15.4272	0.0187974	0.168401	101102295	antisense
Circ_013287	0	0	0	0	0	0	71.6341	119.777	0.001	47.8527	15.5463	0.0408727	0.288404	101102295	antisense
Circ_013314	117.486	90.9732	126.435	139.361	0	0	23.878	14.9721	118.564	9.71253	-3.60967	0.00015426	0.00394221	101102453	annot_exons
Circ_013317	195.81	363.893	227.583	139.361	0	0	0	0	231.662	0.001	-17.8217	5.27228e-09	6.04685e-07	101103544	annot_exons
Circ_013322	0	0	0	0	41.2348	13.3731	214.902	74.8604	0.001	86.0927	16.3936	0.00101227	0.0178853	101103791	annot_exons
Circ_013326	137.067	159.203	101.148	111.489	82.4697	53.4924	23.878	44.9162	127.227	51.1891	-1.31349	0.0410942	0.289073	101103452	annot_exons
Circ_013329	195.81	386.636	303.444	362.339	13.7449	0	11.939	29.9442	312.057	13.907	-4.48792	5.1804e-10	7.6343e-08	101103949	exon_intron
Circ_013333	0	0	0	0	13.7449	53.4924	35.817	14.9721	0.001	29.5066	14.8488	0.047731	0.318678	101104206	exon_intron
Circ_013357	0	0	0	0	82.4697	40.1193	83.5731	0	0.001	51.5405	15.6534	0.0101342	0.107969	101105805	exon_intron
Circ_013366	0	0	0	0	68.7247	26.7462	83.5731	0	0.001	44.761	15.45	0.0227814	0.191997	101106908	exon_intron
Circ_013376	39.1619	159.203	0	27.8722	0	0	0	0	56.5593	0.001	-15.7875	0.0174529	0.15958	101108719	annot_exons
Circ_013390	39.1619	0	75.861	0	329.879	294.208	191.024	179.665	28.7557	248.694	3.11245	2.71849e-05	0.000951075	101110301	one_exon
Circ_013396	0	0	0	111.489	329.879	347.7	262.658	179.665	27.8722	279.976	3.3284	0.000132822	0.0034828	101110301	annot_exons
Circ_013397	78.3239	68.2299	151.722	0	0	0	0	0	74.569	0.001	-16.1863	0.00278721	0.0402429	101110735	annot_exons
Circ_013399	58.7429	45.4866	126.435	111.489	0	26.7462	35.817	0	85.5384	15.6408	-2.45126	0.0127032	0.128194	101110735	annot_exons
Circ_013400	97.9048	113.716	101.148	195.106	13.7449	0	0	0	126.969	3.43624	-5.2075	2.96121e-06	0.000152268	101106572	one_exon
Circ_013427	0	0	0	0	54.9798	53.4924	35.817	59.8883	0.001	51.0444	15.6395	0.00273194	0.039662	101109944	antisense
Circ_013446	176.229	159.203	227.583	83.6167	54.9798	26.7462	0	0	161.658	20.4315	-2.98408	0.000281418	0.00636121	101111783	annot_exons
Circ_013451	0	0	0	0	68.7247	80.2386	47.7561	14.9721	0.001	52.9229	15.6916	0.00468331	0.0601172	101112035	annot_exons
Circ_013453	0	0	25.287	55.7445	164.939	133.731	83.5731	89.8325	20.2579	118.019	2.54246	0.00394148	0.0527243	101112035	annot_exons
Circ_013463	195.81	90.9732	101.148	0	0	0	23.878	59.8883	96.9827	20.9416	-2.21136	0.0427161	0.296061	101112545	annot_exons
Circ_013487	117.486	204.69	177.009	55.7445	0	0	0	0	138.732	0.001	-17.0819	3.29842e-06	0.000166365	101122760	annot_exons
Circ_013488	58.7429	90.9732	101.148	111.489	13.7449	0	35.817	0	90.5883	12.3905	-2.87009	0.00225996	0.034066	101122760	annot_exons
Circ_013489	0	0	0	0	41.2348	40.1193	47.7561	44.9162	0.001	43.5066	15.4089	0.00721953	0.0843419	101114086	exon_intron
Circ_013498	39.1619	318.406	50.574	0	0	0	0	0	102.036	0.001	-16.6387	0.00222002	0.0335983	NA	intergenic
Circ_013501	97.9048	45.4866	101.148	0	0	13.3731	0	0	61.1349	3.34327	-4.19266	0.0264281	0.213195	101102701	annot_exons
Circ_013505	137.067	22.7433	75.861	0	13.7449	0	0	0	58.9178	3.43624	-4.0998	0.0372654	0.271179	101102701	annot_exons
Circ_013514	0	0	0	0	68.7247	26.7462	23.878	104.805	0.001	56.0384	15.7741	0.00396343	0.0529105	101103123	annot_exons
Circ_013515	0	0	0	0	82.4697	53.4924	0	29.9442	0.001	41.4766	15.34	0.0233893	0.195633	101103123	annot_exons
Circ_013518	0	0	0	0	68.7247	13.3731	35.817	14.9721	0.001	33.2217	15.0198	0.0354472	0.261554	101103123	annot_exons
Circ_013521	0	0	0	0	27.4899	26.7462	83.5731	29.9442	0.001	41.9383	15.356	0.0125966	0.12741	101103123	annot_exons
Circ_013522	0	0	0	0	123.705	0	35.817	29.9442	0.001	47.3664	15.5316	0.0216745	0.185471	101103123	exon_intron
Circ_013527	0	0	0	0	27.4899	0	11.939	179.665	0.001	54.7735	15.7412	0.029188	0.228719	101104718	exon_intron
Circ_013528	0	0	0	0	68.7247	80.2386	11.939	29.9442	0.001	47.7116	15.5421	0.0098601	0.105947	101104718	exon_intron
Circ_013533	195.81	90.9732	126.435	27.8722	0	0	0	0	110.273	0.001	-16.7507	5.79034e-05	0.001779	101104964	annot_exons
Circ_013534	117.486	136.46	303.444	195.106	0	0	0	0	188.124	0.001	-17.5213	1.22991e-07	9.65593e-06	101104964	annot_exons
Circ_013552	0	0	0	0	41.2348	13.3731	59.6951	59.8883	0.001	43.5478	15.4103	0.0113173	0.117074	101105978	exon_intron
Circ_013553	0	68.2299	0	27.8722	329.879	387.82	238.78	89.8325	24.0255	261.578	3.4446	9.33084e-05	0.00259093	101105978	one_exon
Circ_013558	293.715	159.203	25.287	83.6167	0	26.7462	0	14.9721	140.455	10.4296	-3.75136	0.000789979	0.014532	NA	intergenic
Circ_013569	1057.37	2297.07	1416.07	1532.97	164.939	80.2386	83.5731	164.693	1575.87	123.361	-3.67519	1.87138e-14	5.80766e-12	101108630	annot_exons
Circ_013571	58.7429	181.946	75.861	139.361	27.4899	13.3731	23.878	44.9162	113.978	27.4143	-2.05575	0.0155343	0.14719	101108630	annot_exons
Circ_013586	0	0	0	0	123.705	120.358	119.39	44.9162	0.001	102.092	16.6395	0.000127903	0.00340115	NA	intergenic
Circ_013587	19.581	22.7433	25.287	0	907.167	762.266	1050.63	538.995	16.9028	814.765	5.59105	3.25209e-16	1.2998e-13	NA	intergenic
Circ_013601	0	0	0	0	54.9798	66.8655	35.817	59.8883	0.001	54.3877	15.731	0.00174771	0.0278062	NA	intergenic
Circ_013605	0	0	0	0	178.684	66.8655	107.451	179.665	0.001	133.166	17.0229	1.57047e-05	0.000614926	NA	intergenic
Circ_013633	0	159.203	50.574	0	192.429	280.835	179.085	239.553	52.4443	222.976	2.08803	0.0120771	0.123177	101111519	annot_exons
Circ_013638	58.7429	0	151.722	55.7445	261.154	160.477	346.231	149.721	66.5524	229.396	1.78528	0.0166336	0.154663	101111519	annot_exons
Circ_013642	0	0	0	0	41.2348	53.4924	23.878	59.8883	0.001	44.6234	15.4455	0.00864603	0.096413	101111519	annot_exons
Circ_013654	117.486	45.4866	126.435	55.7445	0	13.3731	11.939	29.9442	86.288	13.8141	-2.64302	0.00806127	0.0917379	101111939	one_exon
Circ_013666	39.1619	0	75.861	27.8722	0	0	0	0	35.7238	0.001	-15.1246	0.0474568	0.317732	101113654	exon_intron
Circ_013681	78.3239	295.663	75.861	222.978	27.4899	53.4924	11.939	0	168.206	23.2303	-2.85615	0.00182082	0.0287265	101115510	annot_exons
Circ_013694	0	0	0	0	41.2348	53.4924	23.878	89.8325	0.001	52.1094	15.6693	0.00432278	0.0565067	101117220	annot_exons
Circ_013699	19.581	0	0	0	41.2348	13.3731	95.5121	59.8883	4.89524	52.5021	3.42292	0.0241474	0.200058	101117992	exon_intron
Circ_013741	352.457	22.7433	50.574	0	0	0	0	0	106.444	0.001	-16.6997	0.00242543	0.0359845	101120218	annot_exons
Circ_013750	117.486	68.2299	0	0	0	0	0	0	46.4289	0.001	-15.5027	0.0458723	0.309718	101120218	annot_exons
Circ_013752	78.3239	22.7433	50.574	83.6167	0	0	11.939	0	58.8145	2.98475	-4.30049	0.00239671	0.0356586	101120218	annot_exons
Circ_013759	39.1619	68.2299	25.287	83.6167	0	0	11.939	0	54.0739	2.98475	-4.17925	0.00565966	0.0697971	100913158	annot_exons
Circ_013761	391.619	432.123	252.87	473.828	41.2348	26.7462	47.7561	0	387.61	28.9343	-3.74375	6.28835e-10	8.9848e-08	101121148	annot_exons
Circ_013764	411.2	659.556	278.157	111.489	27.4899	0	47.7561	14.9721	365.1	22.5545	-4.01681	1.27468e-06	7.57317e-05	101121148	annot_exons
Circ_013779	58.7429	45.4866	25.287	83.6167	0	0	0	0	53.2833	0.001	-15.7014	0.00583791	0.0713616	101122165	annot_exons
Circ_013784	19.581	22.7433	50.574	83.6167	0	0	0	0	44.1287	0.001	-15.4294	0.0191054	0.17061	101122165	annot_exons
Circ_013807	587.429	659.556	278.157	641.061	68.7247	133.731	179.085	104.805	541.551	121.586	-2.15512	1.71469e-05	0.000656486	101122574	one_exon
Circ_013812	78.3239	0	0	111.489	0	0	0	0	47.4532	0.001	-15.5342	0.0492217	0.325663	101122503	annot_exons
Circ_013836	117.486	22.7433	126.435	111.489	27.4899	26.7462	11.939	14.9721	94.5383	20.2868	-2.22036	0.0140297	0.137631	101123605	annot_exons
Circ_013837	195.81	318.406	708.036	278.722	137.449	106.985	107.451	134.749	375.244	121.659	-1.62499	0.00363429	0.049626	101123605	annot_exons
Circ_013840	176.229	90.9732	252.87	83.6167	0	66.8655	35.817	0	150.922	25.6706	-2.55561	0.00279205	0.0402687	101123605	annot_exons
Circ_013843	78.3239	45.4866	0	55.7445	0	0	0	0	44.8887	0.001	-15.4541	0.0197292	0.174059	101123605	annot_exons
Circ_013855	78.3239	22.7433	75.861	222.978	13.7449	0	0	14.9721	99.9765	7.17926	-3.79968	0.00146796	0.0241719	101102874	one_exon
Circ_013856	195.81	0	50.574	0	0	0	0	0	61.5959	0.001	-15.9105	0.02203	0.187939	101103125	annot_exons
Circ_013861	0	0	0	0	96.2146	0	59.6951	14.9721	0.001	42.7204	15.3826	0.030613	0.236334	101103125	annot_exons
Circ_013892	783.239	1296.37	455.166	418.084	151.194	173.85	226.841	134.749	738.214	171.659	-2.1045	5.98806e-05	0.00182612	101107668	annot_exons
Circ_013899	137.067	90.9732	177.009	83.6167	41.2348	13.3731	35.817	14.9721	122.166	26.3493	-2.21301	0.00305948	0.0433903	101107668	annot_exons
Circ_013909	0	0	0	0	123.705	53.4924	119.39	179.665	0.001	119.063	16.8614	5.94191e-05	0.00181624	NA	intergenic
Circ_013910	0	0	0	0	27.4899	53.4924	59.6951	14.9721	0.001	38.9124	15.2479	0.0179604	0.16281	NA	intergenic
Circ_013918	0	0	0	0	82.4697	66.8655	83.5731	239.553	0.001	118.115	16.8498	2.21301e-05	0.000804091	NA	intergenic
Circ_013924	2193.07	2865.66	1137.92	1365.74	577.288	320.954	823.792	179.665	1890.59	475.425	-1.99155	0.000420731	0.00880132	101109512	annot_exons
Circ_013930	156.648	45.4866	50.574	111.489	302.389	267.462	95.5121	239.553	91.0493	226.229	1.31306	0.0397764	0.283508	101110029	annot_exons
Circ_013946	313.295	386.636	303.444	362.339	0	13.3731	11.939	14.9721	341.429	10.071	-5.0833	1.87895e-13	4.72046e-11	101112287	one_exon
Circ_013964	234.972	45.4866	0	0	0	0	0	0	70.1146	0.001	-16.0974	0.0150666	0.144314	101108553	annot_exons
Circ_013984	254.553	22.7433	202.296	195.106	13.7449	13.3731	0	0	168.674	6.77951	-4.63692	3.52866e-05	0.00118728	101116706	annot_exons
Circ_013992	19.581	0	0	0	123.705	93.6117	59.6951	0	4.89524	69.2528	3.82242	0.0100058	0.107076	NA	intergenic
Circ_014002	0	0	0	27.8722	96.2146	66.8655	59.6951	74.8604	6.96806	74.4089	3.41665	0.00462406	0.0595887	101109076	annot_exons
Circ_014029	19.581	68.2299	75.861	27.8722	0	13.3731	0	0	47.886	3.34327	-3.84027	0.0457545	0.309133	100820749	exon_intron
Circ_014044	313.295	22.7433	202.296	390.211	54.9798	93.6117	0	29.9442	232.137	44.6339	-2.37876	0.0117227	0.120418	101120139	annot_exons
Circ_014062	274.134	591.326	455.166	445.956	82.4697	106.985	95.5121	89.8325	441.645	93.6998	-2.23677	1.36423e-06	7.99711e-05	101114757	annot_exons
Circ_014063	0	0	0	0	41.2348	106.985	107.451	89.8325	0.001	86.3758	16.3983	6.89531e-05	0.00202552	101114757	annot_exons
Circ_014066	39.1619	68.2299	50.574	111.489	728.482	213.97	465.622	329.386	67.3637	434.365	2.68886	2.28268e-05	0.000827125	101114757	annot_exons
Circ_014071	391.619	45.4866	25.287	0	0	26.7462	0	0	115.598	6.68655	-4.11171	0.00916251	0.10054	101115008	annot_exons
Circ_014072	39.1619	0	126.435	27.8722	0	0	0	0	48.3673	0.001	-15.5617	0.0292101	0.22872	101115008	exon_intron
Circ_014097	58.7429	45.4866	151.722	139.361	13.7449	26.7462	0	0	98.8282	10.1228	-3.28732	0.00221856	0.0335956	101102534	annot_exons
Circ_014112	97.9048	113.716	25.287	139.361	41.2348	0	35.817	14.9721	94.0674	23.006	-2.03168	0.0323724	0.245871	100188913	annot_exons
Circ_014120	156.648	136.46	177.009	278.722	0	40.1193	95.5121	29.9442	187.21	41.3939	-2.17717	0.00311794	0.0440772	101106911	annot_exons
Circ_014123	234.972	159.203	75.861	167.233	0	13.3731	11.939	59.8883	159.317	21.3001	-2.90297	0.000341141	0.00745871	101106911	annot_exons
Circ_014128	137.067	181.946	379.305	334.467	41.2348	66.8655	71.6341	59.8883	258.196	59.9057	-2.1077	0.000368961	0.00795815	101106911	annot_exons
Circ_014135	0	0	0	0	82.4697	13.3731	23.878	14.9721	0.001	33.6732	15.0393	0.0417967	0.291899	101107166	annot_exons
Circ_014146	0	0	0	27.8722	82.4697	133.731	83.5731	59.8883	6.96806	89.9155	3.68974	0.00128651	0.0216711	101107166	annot_exons
Circ_014149	78.3239	181.946	50.574	0	0	0	0	14.9721	77.7111	3.74302	-4.37585	0.0108426	0.113544	101107573	antisense
Circ_014152	0	0	0	0	68.7247	26.7462	95.5121	119.777	0.001	77.6899	16.2454	0.000273173	0.00621209	101108367	annot_exons
Circ_014161	254.553	45.4866	126.435	195.106	0	0	11.939	0	155.395	2.98475	-5.70218	3.25593e-06	0.00016517	101110389	annot_exons
Circ_014166	78.3239	181.946	101.148	27.8722	0	0	0	0	97.3226	0.001	-16.5705	0.000137958	0.00359318	101110389	annot_exons
Circ_014173	39.1619	45.4866	0	167.233	0	13.3731	11.939	0	62.9705	6.32803	-3.31485	0.0332474	0.250653	101111161	annot_exons
Circ_014176	0	113.716	126.435	167.233	0	0	0	0	101.846	0.001	-16.636	0.000532424	0.0106205	101111691	annot_exons
Circ_014192	39.1619	22.7433	0	83.6167	0	0	0	0	36.3805	0.001	-15.1509	0.0499559	0.3292	101114493	annot_exons
Circ_014195	0	0	0	0	151.194	106.985	119.39	44.9162	0.001	105.621	16.6885	0.000112185	0.00304277	NA	intergenic
Circ_014207	39.1619	113.716	202.296	0	0	0	0	29.9442	88.7936	7.48604	-3.56818	0.00907682	0.0998072	101116019	annot_exons
Circ_014208	19.581	181.946	0	27.8722	13.7449	13.3731	0	0	57.3499	6.77951	-3.08054	0.0476745	0.318462	443143	annot_exons
Circ_014209	58.7429	90.9732	379.305	222.978	0	13.3731	0	44.9162	188	14.5723	-3.68943	0.000410533	0.00866356	443143	annot_exons
Circ_014218	0	0	0	0	27.4899	66.8655	83.5731	59.8883	0.001	59.4542	15.8595	0.00135983	0.0226601	101121155	annot_exons
Circ_014223	58.7429	68.2299	177.009	111.489	41.2348	0	11.939	44.9162	103.868	24.5225	-2.08257	0.0184347	0.165743	101117305	annot_exons
Circ_014228	607.01	682.299	682.749	445.956	123.705	173.85	131.329	164.693	604.503	148.394	-2.02632	5.21798e-08	4.57293e-06	101117305	annot_exons
Circ_014236	58.7429	113.716	101.148	83.6167	0	0	23.878	0	89.306	5.96951	-3.90307	0.000562823	0.0111378	443499	annot_exons
Circ_014237	19.581	159.203	50.574	111.489	13.7449	0	23.878	0	85.2117	9.40574	-3.17944	0.00952881	0.103568	443499	annot_exons
Circ_014238	39.1619	45.4866	75.861	0	0	0	0	0	40.1274	0.001	-15.2923	0.0287833	0.226323	101121069	annot_exons
Circ_014249	97.9048	0	151.722	55.7445	0	0	11.939	0	76.3428	2.98475	-4.67681	0.00276718	0.0400194	101122080	annot_exons
Circ_014250	195.81	432.123	354.018	306.595	68.7247	26.7462	71.6341	14.9721	322.136	45.5193	-2.82312	2.48764e-06	0.000132837	101122080	annot_exons
Circ_014267	352.457	204.69	227.583	445.956	54.9798	66.8655	83.5731	29.9442	307.671	58.8406	-2.38651	2.47511e-05	0.0008847	101123096	annot_exons
Circ_014274	332.876	181.946	177.009	55.7445	0	0	35.817	0	186.894	8.95426	-4.3835	5.05568e-05	0.00161067	101103294	annot_exons
Circ_014279	117.486	90.9732	0	27.8722	0	0	0	0	59.0828	0.001	-15.8505	0.00964163	0.104331	101104553	annot_exons
Circ_014281	215.391	500.353	25.287	0	13.7449	53.4924	11.939	29.9442	185.258	27.2801	-2.76361	0.0224952	0.190131	101104553	annot_exons
Circ_014285	0	0	0	0	27.4899	53.4924	11.939	59.8883	0.001	38.2024	15.2214	0.01984	0.174337	101104553	annot_exons
Circ_014296	0	22.7433	151.722	83.6167	0	0	0	0	64.5205	0.001	-15.9775	0.0106628	0.112061	NA	intergenic
Circ_014299	0	90.9732	101.148	55.7445	0	0	0	0	61.9664	0.001	-15.9192	0.00809197	0.0920078	NA	intergenic
Circ_014302	0	0	0	0	316.134	414.566	322.353	104.805	0.001	289.464	18.143	1.7642e-08	1.69694e-06	101107574	annot_exons
Circ_014323	0	22.7433	0	0	13.7449	147.104	95.5121	149.721	5.68582	101.52	4.15826	0.00329374	0.0459712	101105639	annot_exons
Circ_014325	176.229	227.433	252.87	167.233	68.7247	53.4924	47.7561	119.777	205.941	72.4375	-1.50743	0.0044581	0.0576754	101106411	one_exon
Circ_014327	0	0	0	0	27.4899	26.7462	131.329	89.8325	0.001	68.8494	16.0712	0.00140334	0.0232211	101106411	annot_exons
Circ_014354	0	0	0	0	41.2348	93.6117	107.451	89.8325	0.001	83.0325	16.3414	9.78339e-05	0.00269954	101116207	annot_exons
Circ_014373	0	0	0	0	96.2146	80.2386	191.024	0	0.001	91.8694	16.4873	0.000849812	0.0153776	101118079	annot_exons
Circ_014376	0	0	0	0	41.2348	40.1193	35.817	14.9721	0.001	33.0358	15.0117	0.0239095	0.198462	101118079	annot_exons
Circ_014378	39.1619	0	0	55.7445	247.409	361.074	549.195	434.19	23.7266	397.967	4.06807	4.25779e-08	3.80733e-06	101118079	annot_exons
Circ_014386	0	0	0	0	41.2348	40.1193	23.878	14.9721	0.001	30.0511	14.8751	0.0398926	0.284037	101118079	annot_exons
Circ_014401	39.1619	68.2299	50.574	55.7445	178.684	240.716	107.451	164.693	53.4276	172.886	1.69416	0.00825177	0.093342	101107938	annot_exons
Circ_014407	352.457	136.46	101.148	27.8722	0	0	11.939	0	154.484	2.98475	-5.69371	2.3927e-05	0.000859905	101107938	annot_exons
Circ_014409	489.524	727.785	632.175	641.061	137.449	213.97	155.207	104.805	622.637	152.858	-2.0262	9.98996e-08	8.0343e-06	101107938	annot_exons
Circ_014411	137.067	0	50.574	83.6167	0	13.3731	0	0	67.8144	3.34327	-4.34226	0.0173866	0.15914	101120053	antisense
Circ_014418	97.9048	22.7433	252.87	195.106	0	0	47.7561	74.8604	142.156	30.6541	-2.21332	0.0367291	0.268461	101122252	annot_exons
Circ_014426	97.9048	0	75.861	0	137.449	200.596	155.207	74.8604	43.4415	142.028	1.70903	0.0453245	0.307119	101108728	annot_exons
Circ_014429	0	0	0	0	13.7449	53.4924	47.7561	14.9721	0.001	32.4914	14.9878	0.0324723	0.246429	101108728	annot_exons
Circ_014431	0	0	0	0	109.96	93.6117	59.6951	44.9162	0.001	77.0456	16.2334	0.000160868	0.00408426	101108728	annot_exons
Circ_014432	0	0	0	0	68.7247	13.3731	95.5121	0	0.001	44.4025	15.4384	0.03076	0.237092	101108728	annot_exons
Circ_014436	528.686	318.406	910.332	418.084	0	0	23.878	44.9162	543.877	17.1986	-4.98292	1.47204e-10	2.33922e-08	106990335	exon_intron
Circ_014453	176.229	45.4866	0	27.8722	0	0	0	0	62.3969	0.001	-15.9292	0.0102186	0.108648	101110310	annot_exons
Circ_014478	0	0	0	0	123.705	26.7462	23.878	29.9442	0.001	51.0682	15.6401	0.00848902	0.0950878	101107575	exon_intron
Circ_014523	0	0	0	0	123.705	120.358	83.5731	59.8883	0.001	96.881	16.5639	0.000186983	0.00459686	101112454	annot_exons
Circ_014536	97.9048	181.946	177.009	195.106	13.7449	0	35.817	14.9721	162.991	16.1335	-3.33666	2.47936e-05	0.000885021	101115095	exon_intron
Circ_014547	293.715	500.353	429.879	27.8722	96.2146	160.477	71.6341	119.777	312.955	112.026	-1.48212	0.0438004	0.30081	101116803	annot_exons
Circ_014550	97.9048	136.46	75.861	0	0	0	0	0	77.5564	0.001	-16.243	0.00173168	0.0276249	101116803	annot_exons
Circ_014553	352.457	227.433	429.879	250.85	27.4899	13.3731	11.939	14.9721	315.155	16.9435	-4.21726	1.4356e-09	1.87117e-07	101116803	exon_intron
Circ_014559	117.486	90.9732	303.444	55.7445	13.7449	53.4924	0	14.9721	141.912	20.5524	-2.78762	0.00276252	0.0399959	101117649	annot_exons
Circ_014568	39.1619	90.9732	75.861	83.6167	0	0	0	14.9721	72.4032	3.74302	-4.27378	0.000622062	0.0120127	101118926	annot_exons
Circ_014569	685.334	409.379	531.027	529.572	123.705	93.6117	95.5121	239.553	538.828	138.095	-1.96416	1.145e-05	0.000477704	101118926	annot_exons
Circ_014576	0	0	0	0	0	106.985	47.7561	29.9442	0.001	46.1712	15.4947	0.0185858	0.166817	101113663	annot_exons
Circ_014586	78.3239	45.4866	75.861	55.7445	27.4899	0	0	14.9721	63.854	10.6155	-2.58861	0.016781	0.155704	101122253	annot_exons
Circ_014591	117.486	68.2299	0	55.7445	0	0	11.939	0	60.365	2.98475	-4.33803	0.00649731	0.0777291	443304	annot_exons
Circ_014599	254.553	22.7433	50.574	139.361	13.7449	0	0	0	116.808	3.43624	-5.08716	0.000141041	0.00365115	101122761	annot_exons
Circ_014605	39.1619	90.9732	50.574	27.8722	0	13.3731	0	0	52.1453	3.34327	-3.9632	0.0266875	0.214853	101122761	annot_exons
Circ_014628	117.486	0	177.009	55.7445	13.7449	0	35.817	14.9721	87.5598	16.1335	-2.44021	0.0294323	0.229634	101104298	annot_exons
Circ_014631	0	0	25.287	0	82.4697	280.835	202.963	194.637	6.32175	190.226	4.91125	3.52978e-06	0.000175683	101104555	annot_exons
Circ_014633	665.753	409.379	404.592	501.7	1621.9	1270.44	1528.19	1347.49	495.356	1442.01	1.54154	3.34947e-08	3.05729e-06	101104555	annot_exons
Circ_014644	137.067	181.946	75.861	167.233	0	13.3731	0	0	140.527	3.34327	-5.39344	1.03389e-06	6.29864e-05	101104967	annot_exons
Circ_014652	0	0	0	0	137.449	147.104	143.268	59.8883	0.001	121.928	16.8957	2.61146e-05	0.000920957	101104967	antisense
Circ_014655	19.581	22.7433	0	27.8722	233.664	93.6117	202.963	104.805	17.5491	158.761	3.17738	0.000293968	0.00658284	101105474	annot_exons
Circ_014672	137.067	250.176	202.296	306.595	41.2348	0	155.207	29.9442	224.033	56.5966	-1.98493	0.0100435	0.107219	101107672	exon_intron
Circ_014682	607.01	1228.14	960.906	864.039	41.2348	53.4924	11.939	164.693	915.023	67.8398	-3.75361	2.64066e-09	3.21004e-07	NA	intergenic
Circ_014683	39.1619	68.2299	50.574	83.6167	0	13.3731	0	0	60.3956	3.34327	-4.17511	0.00173212	0.0276249	NA	intergenic
Circ_014684	0	0	227.583	55.7445	0	0	0	0	70.8319	0.001	-16.1121	0.0219027	0.187162	NA	intergenic
Circ_014709	0	0	0	0	41.2348	53.4924	71.6341	0	0.001	41.5903	15.344	0.0199515	0.175025	101112377	annot_exons
Circ_014710	0	0	0	0	219.919	160.477	179.085	89.8325	0.001	162.329	17.3086	8.98695e-07	5.6177e-05	101112377	annot_exons
Circ_014712	0	0	0	0	13.7449	66.8655	35.817	14.9721	0.001	32.8499	15.0036	0.0347346	0.257733	101112377	annot_exons
Circ_014713	0	0	25.287	0	96.2146	106.985	143.268	209.609	6.32175	139.019	4.45882	3.45798e-05	0.00116529	101112377	annot_exons
Circ_014719	19.581	113.716	50.574	83.6167	27.4899	0	0	0	66.872	6.87247	-3.2825	0.0116637	0.119952	101112629	annot_exons
Circ_014720	0	0	0	0	41.2348	26.7462	47.7561	29.9442	0.001	36.4203	15.1525	0.0210316	0.181673	101112629	antisense
Circ_014724	39.1619	363.893	202.296	27.8722	13.7449	26.7462	0	29.9442	158.306	17.6088	-3.16834	0.00473621	0.0606488	101112629	annot_exons
Circ_014725	19.581	45.4866	101.148	167.233	0	0	0	0	83.3622	0.001	-16.3471	0.00112311	0.0194577	101112882	annot_exons
Circ_014729	39.1619	136.46	25.287	83.6167	0	0	0	0	71.1314	0.001	-16.1182	0.00174454	0.0277818	101112882	exon_intron
Circ_014732	3309.18	1978.67	5082.69	1895.31	852.187	173.85	405.927	1272.63	3066.46	676.148	-2.18117	0.000800457	0.0146736	101112882	annot_exons
Circ_014765	58.7429	136.46	50.574	0	0	0	0	0	61.4442	0.001	-15.907	0.00810592	0.0921127	101122583	annot_exons
Circ_014766	19.581	0	126.435	55.7445	0	0	0	0	50.4401	0.001	-15.6223	0.0243966	0.20162	101122583	annot_exons
Circ_014771	97.9048	68.2299	75.861	55.7445	0	0	23.878	0	74.4351	5.96951	-3.6403	0.0021872	0.0332542	100307049	annot_exons
Circ_014780	19.581	45.4866	50.574	55.7445	0	0	0	0	42.8465	0.001	-15.3869	0.013938	0.136884	101118080	annot_exons
Circ_014785	78.3239	0	202.296	0	0	0	0	0	70.155	0.001	-16.0983	0.0163041	0.152459	101119019	annot_exons
Circ_014799	0	0	0	0	96.2146	147.104	119.39	149.721	0.001	128.107	16.967	5.3574e-06	0.000251912	101119280	annot_exons
Circ_014809	0	0	0	0	123.705	0	23.878	44.9162	0.001	48.1247	15.5545	0.0221534	0.188506	101119280	annot_exons
Circ_014815	39.1619	68.2299	0	55.7445	0	0	0	0	40.7841	0.001	-15.3157	0.0284914	0.225224	101119960	annot_exons
Circ_014818	156.648	22.7433	25.287	0	0	0	0	0	51.1695	0.001	-15.643	0.0263406	0.212945	101119960	annot_exons
Circ_014821	0	22.7433	0	27.8722	164.939	120.358	119.39	284.469	12.6539	172.289	3.76718	8.30355e-05	0.00235021	101123103	annot_exons
Circ_014823	0	0	0	0	41.2348	26.7462	47.7561	14.9721	0.001	32.6773	14.996	0.0257253	0.209507	101123103	annot_exons
Circ_014826	0	0	0	0	41.2348	93.6117	59.6951	119.777	0.001	78.5796	16.2619	0.000192533	0.00468525	101123103	annot_exons
Circ_014830	58.7429	0	0	0	247.409	200.596	250.719	209.609	14.6857	227.083	3.95074	7.45603e-07	4.73934e-05	101123103	annot_exons
Circ_014836	0	0	0	0	68.7247	0	59.6951	29.9442	0.001	39.591	15.2729	0.0301504	0.234026	101123103	annot_exons
Circ_014837	0	0	0	0	54.9798	66.8655	47.7561	14.9721	0.001	46.1434	15.4938	0.00686769	0.0811297	101123103	annot_exons
Circ_014856	0	0	0	0	54.9798	66.8655	47.7561	29.9442	0.001	49.8864	15.6064	0.00316262	0.0444705	101123609	exon_intron
Circ_014860	39.1619	22.7433	75.861	55.7445	426.093	668.655	429.805	479.106	48.3777	500.915	3.37215	6.77004e-10	9.60145e-08	101123609	annot_exons
Circ_014863	19.581	113.716	25.287	0	357.369	374.447	405.927	598.883	39.6461	434.156	3.45296	3.99499e-07	2.73015e-05	101123609	annot_exons
Circ_014866	78.3239	68.2299	101.148	0	398.604	468.058	370.109	344.358	61.9254	395.282	2.67428	1.74587e-06	9.84068e-05	101123609	annot_exons
Circ_014867	0	0	0	0	54.9798	40.1193	35.817	59.8883	0.001	47.7011	15.5417	0.00469275	0.0601799	101123609	annot_exons
Circ_014873	0	0	0	0	41.2348	173.85	11.939	59.8883	0.001	71.7281	16.1303	0.00261095	0.0383819	101123609	annot_exons
Circ_014874	0	0	0	0	151.194	254.089	155.207	119.777	0.001	170.067	17.3757	5.19026e-07	3.44871e-05	101123609	annot_exons
Circ_014891	58.7429	22.7433	126.435	83.6167	0	26.7462	11.939	29.9442	72.8845	17.1573	-2.08679	0.0253273	0.207359	101104557	annot_exons
Circ_014918	39.1619	295.663	177.009	334.467	13.7449	0	23.878	74.8604	211.575	28.1208	-2.91146	0.00194702	0.0303727	101106914	one_exon
Circ_014919	176.229	181.946	151.722	334.467	41.2348	26.7462	47.7561	0	211.091	28.9343	-2.86701	6.51922e-05	0.00194098	101106914	annot_exons
Circ_014932	19.581	0	0	0	13.7449	106.985	59.6951	149.721	4.89524	82.5364	4.07558	0.00282176	0.040542	101108809	annot_exons
Circ_014936	0	0	0	0	68.7247	13.3731	0	89.8325	0.001	42.9826	15.3915	0.0321649	0.244659	101108809	annot_exons
Circ_014959	0	0	0	0	54.9798	0	47.7561	44.9162	0.001	36.913	15.1718	0.026675	0.214853	101111524	annot_exons
Circ_014962	39.1619	0	0	0	27.4899	106.985	35.817	164.693	9.79048	83.7461	3.09657	0.0249979	0.205683	101112293	annot_exons
Circ_014987	430.781	955.218	379.305	250.85	27.4899	26.7462	0	14.9721	504.039	17.302	-4.86452	1.6266e-09	2.08291e-07	101104305	annot_exons
Circ_014989	137.067	90.9732	50.574	167.233	0	66.8655	35.817	0	111.462	25.6706	-2.11836	0.0163504	0.152838	101113827	annot_exons
Circ_014993	215.391	227.433	910.332	836.167	0	53.4924	0	104.805	547.331	39.5742	-3.78978	4.8564e-05	0.0015661	101113827	annot_exons
Circ_014994	39.1619	0	75.861	111.489	0	0	23.878	0	56.628	5.96951	-3.24583	0.0443244	0.302832	100135449	annot_exons
Circ_015006	0	0	0	0	54.9798	80.2386	83.5731	104.805	0.001	80.899	16.3038	7.24055e-05	0.00209964	101105807	annot_exons
Circ_015025	0	22.7433	0	0	109.96	40.1193	95.5121	29.9442	5.68582	68.8838	3.59872	0.0131998	0.131743	101120727	annot_exons
Circ_015030	0	0	50.574	27.8722	41.2348	93.6117	202.963	568.939	19.6116	226.687	3.53093	0.00230215	0.0345441	101120727	annot_exons
Circ_015036	0	0	0	0	54.9798	80.2386	23.878	0	0.001	39.7741	15.2795	0.0339453	0.254242	101120727	annot_exons
Circ_015041	78.3239	45.4866	50.574	83.6167	0	40.1193	0	0	64.5003	10.0298	-2.68501	0.0236753	0.197137	101120988	annot_exons
Circ_015047	0	0	0	0	0	40.1193	23.878	89.8325	0.001	38.4574	15.231	0.0368433	0.269072	NA	intergenic
Circ_015049	0	0	0	0	0	13.3731	83.5731	164.693	0.001	65.4098	15.9972	0.00949862	0.103496	101121239	annot_exons
Circ_015051	0	0	0	0	164.939	26.7462	47.7561	89.8325	0.001	82.3185	16.3289	0.000415954	0.00873602	101121239	annot_exons
Circ_015053	19.581	0	0	0	54.9798	93.6117	59.6951	29.9442	4.89524	59.5577	3.60484	0.00709295	0.083047	101121239	annot_exons
Circ_015062	97.9048	90.9732	75.861	250.85	0	13.3731	0	14.9721	128.897	7.08629	-4.18505	8.72591e-05	0.00244353	101122579	annot_exons
Circ_015063	58.7429	250.176	151.722	83.6167	13.7449	53.4924	0	0	136.064	16.8093	-3.01696	0.00138417	0.0229931	101122579	annot_exons
Circ_015066	548.267	727.785	859.758	724.678	13.7449	13.3731	23.878	14.9721	715.122	16.492	-5.43835	9.65495e-21	7.959e-18	101122579	annot_exons
Circ_015067	254.553	22.7433	0	27.8722	0	0	0	0	76.292	0.001	-16.2192	0.00787284	0.0901378	101122579	exon_intron
Circ_015068	117.486	113.716	126.435	55.7445	0	26.7462	0	59.8883	103.345	21.6586	-2.25446	0.00654312	0.0781026	101122579	annot_exons
Circ_015070	1429.41	977.962	885.045	864.039	123.705	160.477	131.329	134.749	1039.11	137.565	-2.91717	4.06511e-14	1.16558e-11	101122579	annot_exons
Circ_015072	195.81	45.4866	25.287	55.7445	0	26.7462	11.939	29.9442	80.5819	17.1573	-2.23163	0.0244199	0.2017	101122579	annot_exons
Circ_015074	137.067	500.353	50.574	195.106	0	93.6117	35.817	0	220.775	32.3572	-2.77042	0.00698697	0.0820246	101122579	one_exon
Circ_015084	234.972	636.812	202.296	529.572	109.96	106.985	107.451	14.9721	400.913	84.8419	-2.24044	0.000614718	0.0119091	101102292	annot_exons
Circ_015090	0	0	0	0	0	53.4924	47.7561	29.9442	0.001	32.7982	15.0013	0.0414173	0.290553	101103044	annot_exons
Circ_015102	0	0	0	0	27.4899	120.358	11.939	44.9162	0.001	51.1758	15.6432	0.00967514	0.104556	101104375	annot_exons
Circ_015104	0	0	0	27.8722	96.2146	106.985	23.878	74.8604	6.96806	75.4845	3.43735	0.00854773	0.0955831	101104375	annot_exons
Circ_015110	0	0	0	0	151.194	66.8655	107.451	104.805	0.001	107.579	16.715	6.13833e-05	0.00186547	101104637	annot_exons
Circ_015116	39.1619	22.7433	25.287	111.489	0	26.7462	0	0	49.6703	6.68655	-2.89305	0.041962	0.292525	NA	intergenic
Circ_015120	215.391	227.433	151.722	167.233	0	0	0	14.9721	190.445	3.74302	-5.66903	4.82806e-09	5.63537e-07	101107255	annot_exons
Circ_015124	39.1619	0	0	0	123.705	53.4924	131.329	29.9442	9.79048	84.6176	3.11151	0.0130092	0.130484	101107255	annot_exons
Circ_015134	117.486	22.7433	0	55.7445	0	0	0	0	48.9934	0.001	-15.5803	0.0210141	0.181673	101109946	annot_exons
Circ_015147	58.7429	227.433	252.87	362.339	137.449	80.2386	35.817	44.9162	225.346	74.6053	-1.59479	0.0253097	0.207279	101110822	annot_exons
Circ_015149	58.7429	0	75.861	27.8722	0	0	0	0	40.619	0.001	-15.3099	0.0325294	0.246576	101110822	annot_exons
Circ_015150	0	90.9732	126.435	111.489	0	0	0	0	82.2243	0.001	-16.3273	0.00198215	0.0307571	101110822	annot_exons
Circ_015157	0	0	0	0	54.9798	53.4924	71.6341	44.9162	0.001	56.2556	15.7797	0.00155217	0.0252745	101111344	annot_exons
Circ_015159	58.7429	0	0	0	329.879	66.8655	262.658	74.8604	14.6857	183.566	3.64381	0.0013693	0.0228036	101111344	annot_exons
Circ_015162	0	0	0	0	41.2348	26.7462	23.878	59.8883	0.001	37.9368	15.2113	0.0154105	0.146355	101111344	annot_exons
Circ_015181	0	0	0	0	41.2348	40.1193	35.817	59.8883	0.001	44.2649	15.4339	0.00763123	0.087907	101115764	antisense
Circ_015184	78.3239	45.4866	278.157	250.85	0	13.3731	11.939	0	163.204	6.32803	-4.68878	5.62685e-05	0.00174624	101118082	antisense
Circ_015190	19.581	45.4866	50.574	55.7445	0	0	11.939	0	42.8465	2.98475	-3.84349	0.0134294	0.133279	101119961	annot_exons
Circ_015193	19.581	0	0	27.8722	426.093	147.104	370.109	254.525	11.8633	299.458	4.65778	2.57409e-07	1.84516e-05	101116385	annot_exons
Circ_015195	0	0	0	0	27.4899	26.7462	47.7561	14.9721	0.001	29.2411	14.8357	0.0409756	0.288404	101116385	exon_intron
Circ_015203	58.7429	113.716	25.287	222.978	13.7449	26.7462	0	29.9442	105.181	17.6088	-2.5785	0.0177433	0.16129	101117145	annot_exons
Circ_015205	195.81	22.7433	126.435	27.8722	13.7449	0	0	0	93.2151	3.43624	-4.76166	0.000442989	0.00918679	101122004	annot_exons
Circ_015215	156.648	272.92	101.148	278.722	0	13.3731	0	0	202.359	3.34327	-5.91951	4.86868e-08	4.29535e-06	101123187	annot_exons
Circ_015223	1488.15	977.962	2958.58	2229.78	494.818	280.835	585.012	59.8883	1913.62	355.138	-2.42985	0.000248976	0.00576624	101102542	annot_exons
Circ_015224	78.3239	90.9732	328.731	306.595	618.523	976.236	1372.99	89.8325	201.156	764.394	1.926	0.0174708	0.159642	101102542	annot_exons
Circ_015236	19.581	45.4866	101.148	0	0	0	0	0	41.5539	0.001	-15.3427	0.0379408	0.274979	101118172	exon_intron
Circ_015237	587.429	1569.29	1694.23	1560.85	96.2146	187.223	358.17	254.525	1352.95	224.033	-2.59432	2.27191e-06	0.000123568	101118172	annot_exons
Circ_015242	0	0	0	0	13.7449	13.3731	95.5121	44.9162	0.001	41.8866	15.3542	0.0208106	0.180579	101103789	exon_intron
Circ_015256	0	0	0	0	247.409	227.343	143.268	209.609	0.001	206.907	17.6586	1.01733e-08	1.0524e-06	101118932	one_exon
Circ_015259	0	0	0	0	27.4899	26.7462	35.817	44.9162	0.001	33.7423	15.0423	0.0215327	0.184779	101118932	annot_exons
Circ_015301	137.067	68.2299	252.87	195.106	0	0	11.939	29.9442	163.318	10.4708	-3.96324	3.83267e-05	0.00127289	101106058	annot_exons
Circ_015304	78.3239	68.2299	50.574	55.7445	0	40.1193	0	0	63.2181	10.0298	-2.65604	0.02216	0.188506	101120733	annot_exons
Circ_015316	19.581	45.4866	126.435	27.8722	13.7449	0	0	14.9721	54.8437	7.17926	-2.93342	0.0259396	0.210801	101108891	annot_exons
Circ_015324	0	22.7433	0	0	137.449	53.4924	95.5121	59.8883	5.68582	86.5856	3.92869	0.00231988	0.0347508	101103218	annot_exons
Circ_015333	0	0	0	0	54.9798	40.1193	23.878	29.9442	0.001	37.2303	15.1842	0.014494	0.140783	101110393	annot_exons
Circ_015373	0	0	0	0	13.7449	13.3731	11.939	134.749	0.001	43.4514	15.4071	0.0361447	0.265366	101120896	annot_exons
Circ_015374	58.7429	45.4866	50.574	55.7445	247.409	200.596	191.024	344.358	52.637	245.847	2.22361	0.000133081	0.00348614	101120896	annot_exons
Circ_015384	58.7429	22.7433	75.861	27.8722	0	0	11.939	0	46.3049	2.98475	-3.95548	0.0100317	0.107214	101123099	annot_exons
Circ_015398	0	0	0	0	13.7449	66.8655	35.817	14.9721	0.001	32.8499	15.0036	0.0347226	0.257723	100271658	annot_exons
Circ_015400	0	0	0	0	192.429	53.4924	59.6951	14.9721	0.001	80.1472	16.2904	0.00114082	0.0196945	100271658	annot_exons
Circ_015402	0	204.69	177.009	250.85	68.7247	40.1193	0	29.9442	158.137	34.697	-2.18829	0.0290295	0.227637	100271658	annot_exons
Circ_015414	1840.61	2842.91	2503.41	3874.24	879.677	869.251	776.036	643.799	2765.29	792.191	-1.80351	7.34849e-08	6.19316e-06	101115263	annot_exons
Circ_015416	391.619	477.609	252.87	473.828	0	40.1193	23.878	29.9442	398.982	23.4854	-4.08649	1.2499e-10	2.00913e-08	101110124	annot_exons
Circ_015423	0	0	0	0	109.96	40.1193	71.6341	0	0.001	55.4282	15.7583	0.0079865	0.0911622	101111864	one_exon
Circ_015426	117.486	136.46	0	27.8722	1498.2	815.759	1755.04	1287.6	70.4545	1339.15	4.24848	2.34282e-10	3.65688e-08	101112118	annot_exons
Circ_015435	0	0	0	0	27.4899	26.7462	23.878	44.9162	0.001	30.7576	14.9087	0.0362855	0.266155	101118595	intronic
Circ_015462	0	0	0	0	261.154	133.731	107.451	0	0.001	125.584	16.9383	0.000251161	0.00579649	101120897	antisense
Circ_015465	0	0	0	0	54.9798	80.2386	47.7561	0	0.001	45.7436	15.4813	0.0136604	0.13481	101121577	annot_exons
Circ_015467	0	0	25.287	0	41.2348	120.358	23.878	89.8325	6.32175	68.8258	3.44455	0.0162014	0.1518	101121577	annot_exons
Circ_015479	39.1619	272.92	25.287	195.106	247.409	294.208	978.999	419.218	133.119	484.959	1.86515	0.0161258	0.151381	NA	intergenic
Circ_015487	0	0	0	0	27.4899	53.4924	35.817	29.9442	0.001	36.6859	15.1629	0.0215457	0.18483	101105220	annot_exons
Circ_015494	0	0	0	0	41.2348	147.104	131.329	59.8883	0.001	94.8891	16.534	7.27939e-05	0.00210783	101105220	annot_exons
Circ_015496	39.1619	0	0	0	398.604	347.7	250.719	284.469	9.79048	320.373	5.03223	4.55094e-10	6.78244e-08	101105220	annot_exons
Circ_015506	19.581	0	0	0	68.7247	66.8655	71.6341	14.9721	4.89524	55.5491	3.50431	0.0130516	0.130758	101105220	annot_exons
Circ_015508	0	0	0	0	123.705	173.85	179.085	374.302	0.001	212.735	17.6987	2.51323e-07	1.80644e-05	101105220	annot_exons
Circ_015517	352.457	68.2299	429.879	167.233	82.4697	13.3731	23.878	0	254.45	29.9302	-3.08771	0.000551776	0.0109603	101105636	annot_exons
Circ_015519	97.9048	136.46	202.296	306.595	41.2348	53.4924	47.7561	14.9721	185.814	39.3638	-2.23891	0.00122629	0.0208564	101105636	annot_exons
Circ_015535	58.7429	318.406	177.009	278.722	481.073	575.043	561.134	673.743	208.22	572.748	1.45979	0.00356619	0.0489451	101104383	annot_exons
Circ_015537	0	0	0	0	0	80.2386	179.085	29.9442	0.001	72.317	16.142	0.00378486	0.0510955	101104383	annot_exons
Circ_015556	215.391	22.7433	101.148	27.8722	206.174	267.462	322.353	464.134	91.7886	315.031	1.77911	0.00951126	0.103542	NA	intergenic
Circ_015578	0	0	0	0	54.9798	66.8655	23.878	0	0.001	36.4308	15.1529	0.0445137	0.303811	101105784	intronic
Circ_015591	861.563	523.096	1365.5	696.806	27.4899	40.1193	71.6341	89.8325	861.741	57.2689	-3.91143	1.54023e-11	2.82152e-09	101106290	annot_exons
Circ_015592	7303.7	3115.83	4829.82	3456.16	838.442	668.655	370.109	1182.79	4676.38	765	-2.61186	1.28357e-07	9.95864e-06	101106290	annot_exons
Circ_015601	97.9048	250.176	50.574	83.6167	27.4899	53.4924	47.7561	0	120.568	32.1846	-1.9054	0.0324245	0.246137	101112267	annot_exons
Circ_015603	0	45.4866	50.574	195.106	0	0	0	0	72.7916	0.001	-16.1515	0.00763687	0.0879126	101112267	exon_intron
Circ_015605	1018.21	1182.65	1314.92	1532.97	247.409	481.431	298.475	329.386	1262.19	339.175	-1.89583	1.19158e-08	1.19516e-06	101112267	annot_exons
Circ_015609	0	0	0	0	0	13.3731	35.817	104.805	0.001	38.4987	15.2325	0.0476416	0.318323	101112267	exon_intron
Circ_015612	19.581	90.9732	126.435	195.106	0	0	0	0	108.024	0.001	-16.721	0.000132174	0.00347273	101113020	annot_exons
Circ_015613	58.7429	22.7433	75.861	0	0	0	0	0	39.3368	0.001	-15.2636	0.0328389	0.24814	101113020	annot_exons
Circ_015631	58.7429	363.893	101.148	83.6167	0	0	0	29.9442	151.85	7.48604	-4.3423	0.00017972	0.00443898	101106802	annot_exons
Circ_015632	19.581	45.4866	177.009	111.489	0	0	0	0	88.3914	0.001	-16.4316	0.000632807	0.0121579	101106802	exon_intron
Circ_015634	19.581	113.716	75.861	55.7445	13.7449	0	0	0	66.2257	3.43624	-4.26849	0.00202011	0.0312726	101113541	exon_intron
Circ_015637	489.524	250.176	177.009	27.8722	41.2348	0	59.6951	14.9721	236.145	28.9755	-3.02677	0.00145301	0.0239406	101113541	annot_exons
Circ_015658	0	0	0	0	54.9798	40.1193	11.939	59.8883	0.001	41.7316	15.3489	0.0123465	0.125337	NA	intergenic
Circ_015676	0	0	0	0	783.462	588.416	465.622	733.632	0.001	642.783	19.294	1.77745e-17	9.3775e-15	NA	intergenic
Circ_015712	0	0	0	0	109.96	120.358	95.5121	164.693	0.001	122.631	16.904	1.34189e-05	0.000543027	NA	intergenic
Circ_015741	39.1619	45.4866	50.574	83.6167	123.705	200.596	262.658	239.553	54.7098	206.628	1.91717	0.00152095	0.0248429	101121213	annot_exons
Circ_015746	0	0	0	0	27.4899	26.7462	83.5731	44.9162	0.001	45.6814	15.4793	0.00740288	0.0857622	101118565	annot_exons
Circ_015747	58.7429	0	0	55.7445	137.449	160.477	191.024	59.8883	28.6218	137.21	2.2612	0.0100733	0.107398	101118565	annot_exons
Circ_015750	19.581	0	0	0	96.2146	80.2386	11.939	14.9721	4.89524	50.8411	3.37654	0.0367422	0.268483	101119590	annot_exons
Circ_015754	0	0	0	0	123.705	80.2386	191.024	44.9162	0.001	109.971	16.7468	2.17872e-05	0.000793817	101119854	one_exon
Circ_015755	0	0	0	0	41.2348	40.1193	23.878	14.9721	0.001	30.0511	14.8751	0.0398864	0.284037	101119854	annot_exons
Circ_015757	0	0	0	0	302.389	93.6117	95.5121	239.553	0.001	182.766	17.4796	3.77666e-06	0.00018552	101119854	annot_exons
Circ_015765	0	90.9732	50.574	27.8722	0	0	0	0	42.3549	0.001	-15.3702	0.0355388	0.261921	100217411	annot_exons
Circ_015771	0	0	0	0	164.939	120.358	35.817	29.9442	0.001	87.7646	16.4214	0.000377144	0.00808178	101121208	annot_exons
[truncated: 1,984 more rows]

## Sheet: Table S5
Table S5 List of differentially expressed circRNAs between 3M and 3Y.
id	3M_1_rpm	3M_2_rpm	3M_3_rpm	3M_4_rpm	3Y-1_rpm	3Y-2_rpm	3Y-3_rpm	3Y-4_rpm	3M_Mean_rpm	3Y_Mean_rpm	log2(FC)	Pvalue	FDR	source_gene	annot_type
Circ_000009	0	0	0	0	13.8818	26.3703	47.8292	50.8375	0.001	34.7297	15.0839	0.0274304	0.224036	101123521	exon_intron
Circ_000016	195.81	159.203	0	195.106	971.723	1028.44	932.669	1232.81	137.53	1041.41	2.92072	9.7105e-07	5.72582e-05	101101945	exon_intron
Circ_000017	0	0	0	27.8722	55.527	105.481	107.616	63.5469	6.96806	83.0427	3.57502	0.00197551	0.0311257	101102445	exon_intron
Circ_000018	0	0	0	0	111.054	65.9257	107.616	38.1282	0.001	80.6809	16.2999	0.000142085	0.00387733	101101945	intronic
Circ_000031	39.1619	22.7433	75.861	83.6167	13.8818	0	11.9573	0	55.3457	6.45976	-3.09892	0.0178172	0.165692	101122393	annot_exons
Circ_000074	0	0	0	0	666.324	540.59	227.188	228.769	0.001	415.718	18.6652	6.05469e-10	8.33641e-08	105616272	exon_intron
Circ_000075	0	0	0	0	97.1723	26.3703	23.9146	12.7094	0.001	40.0416	15.2892	0.0282602	0.228474	105616272	exon_intron
Circ_000110	97.9048	0	101.148	0	0	0	0	0	49.7632	0.001	-15.6028	0.0377526	0.278412	101105449	annot_exons
Circ_000126	0	0	0	0	41.6453	52.7405	23.9146	50.8375	0.001	42.2845	15.3678	0.0088916	0.0992901	101106375	one_exon
Circ_000138	587.429	545.839	581.601	780.423	27.7635	52.7405	0	0	623.823	20.126	-4.954	2.21153e-16	1.17619e-13	101115501	annot_exons
Circ_000140	117.486	0	101.148	0	0	0	0	0	54.6585	0.001	-15.7382	0.0287189	0.230968	101115501	annot_exons
Circ_000142	0	0	0	0	41.6453	105.481	95.6583	38.1282	0.001	70.2282	16.0998	0.000433608	0.00924621	101115501	annot_exons
Circ_000146	58.7429	136.46	25.287	0	13.8818	0	0	0	55.1224	3.47044	-3.98945	0.0484181	0.32379	101115501	annot_exons
Circ_000147	2897.98	2251.59	1694.23	1198.51	513.625	804.293	765.266	635.469	2010.58	679.663	-1.56472	5.57873e-05	0.0018275	101115501	annot_exons
Circ_000154	39.1619	0	0	0	166.581	171.407	203.274	190.641	9.79048	182.976	4.22413	1.32276e-06	7.53753e-05	101109922	annot_exons
Circ_000160	58.7429	181.946	50.574	0	0	13.1851	0	0	72.8158	3.29628	-4.46534	0.0156884	0.150372	101116530	annot_exons
Circ_000174	548.267	432.123	556.314	445.956	55.527	65.9257	59.7864	38.1282	495.665	54.8418	-3.17602	1.15946e-12	2.99516e-10	101117555	antisense
Circ_000206	78.3239	500.353	404.592	55.7445	83.2905	145.036	0	0	259.753	57.0817	-2.18604	0.047691	0.321109	101121469	annot_exons
Circ_000218	0	0	0	0	69.4088	13.1851	71.7437	25.4188	0.001	44.9391	15.4557	0.0099973	0.108812	101122655	antisense
Circ_000222	58.7429	45.4866	50.574	0	638.561	777.923	920.711	838.82	38.7009	794.004	4.35871	2.86873e-16	1.46814e-13	101103519	annot_exons
Circ_000261	0	0	0	0	0	118.666	0	63.5469	0.001	45.5533	15.4753	0.0425544	0.301005	106990833	annot_exons
Circ_000278	0	0	0	0	69.4088	39.5554	23.9146	25.4188	0.001	39.5744	15.2723	0.0170679	0.160357	101111588	annot_exons
Circ_000286	78.3239	113.716	126.435	83.6167	0	13.1851	0	50.8375	100.523	16.0057	-2.65087	0.0030819	0.0440069	101116000	annot_exons
Circ_000289	58.7429	295.663	252.87	111.489	41.6453	0	35.8719	12.7094	179.691	22.5566	-2.9939	0.000874701	0.0163286	101116000	annot_exons
Circ_000306	0	0	0	0	111.054	105.481	23.9146	88.9657	0.001	82.3538	16.3295	0.000213683	0.00529793	101111066	annot_exons
Circ_000313	0	0	0	0	111.054	0	35.8719	12.7094	0.001	39.9088	15.2844	0.0493742	0.328564	101122737	annot_exons
Circ_000330	0	0	0	0	27.7635	79.1108	0	63.5469	0.001	42.6053	15.3787	0.0234989	0.200428	101103101	intronic
Circ_000331	0	0	0	0	27.7635	65.9257	0	63.5469	0.001	39.309	15.2626	0.031413	0.244139	101103101	intronic
Circ_000335	0	0	0	0	111.054	26.3703	83.701	50.8375	0.001	67.9907	16.0531	0.000779822	0.0148748	101103101	intronic
Circ_000358	0	0	0	0	319.28	52.7405	167.402	203.35	0.001	185.693	17.5026	6.5967e-06	0.000300748	101115174	exon_intron
Circ_000362	0	0	0	0	41.6453	79.1108	23.9146	12.7094	0.001	39.345	15.2639	0.0229001	0.197063	101108967	annot_exons
Circ_000408	39.1619	45.4866	25.287	111.489	0	0	0	0	55.3561	0.001	-15.7565	0.00548655	0.0695408	101115584	annot_exons
Circ_000429	39.1619	45.4866	0	27.8722	97.1723	65.9257	155.445	177.931	28.1302	124.119	2.14153	0.00867439	0.0974665	101118317	annot_exons
Circ_000438	97.9048	136.46	227.583	250.85	83.2905	0	47.8292	76.2563	178.199	51.844	-1.78124	0.0118024	0.123117	101119345	annot_exons
Circ_000444	0	0	0	0	111.054	65.9257	35.8719	76.2563	0.001	72.277	16.1412	0.000321879	0.00730597	101122145	antisense
Circ_000446	0	0	0	0	83.2905	52.7405	59.7864	25.4188	0.001	55.3091	15.7552	0.00240077	0.0361011	101122145	one_exon
Circ_000458	450.362	454.866	328.731	278.722	41.6453	26.3703	0	38.1282	378.17	26.5359	-3.83302	3.59699e-10	5.1081e-08	100127210	annot_exons
Circ_000461	0	0	0	0	41.6453	65.9257	23.9146	63.5469	0.001	48.7581	15.5734	0.00584554	0.0730666	101120795	annot_exons
Circ_000464	0	0	0	0	416.453	250.518	597.864	292.316	0.001	389.288	18.5705	1.94679e-11	3.82644e-09	101120795	one_exon
Circ_000466	0	0	0	0	55.527	52.7405	23.9146	0	0.001	33.0455	15.0122	0.0460093	0.314268	101102768	annot_exons
Circ_000469	0	0	0	0	0	26.3703	83.701	38.1282	0.001	37.0499	15.1772	0.0356374	0.267296	101102768	intronic
Circ_000471	234.972	181.946	75.861	111.489	0	39.5554	0	50.8375	151.067	22.5982	-2.74091	0.00155561	0.02565	101103022	annot_exons
Circ_000472	78.3239	181.946	177.009	0	0	13.1851	23.9146	63.5469	109.32	25.1617	-2.11926	0.0467312	0.316884	101103022	annot_exons
Circ_000489	19.581	45.4866	25.287	139.361	0	0	0	0	57.4289	0.001	-15.8095	0.00878945	0.0984737	101104698	annot_exons
Circ_000495	19.581	0	151.722	83.6167	0	0	11.9573	0	63.7299	2.98932	-4.41408	0.0096608	0.106132	101121820	annot_exons
Circ_000507	0	136.46	354.018	83.6167	0	0	11.9573	0	143.524	2.98932	-5.58533	0.0003023	0.00695469	101106044	annot_exons
Circ_000508	97.9048	0	75.861	55.7445	0	0	0	0	57.3776	0.001	-15.8082	0.00788183	0.0910383	101106044	annot_exons
Circ_000521	0	68.2299	101.148	83.6167	0	0	0	0	63.2487	0.001	-15.9487	0.00592541	0.0738946	101123342	annot_exons
Circ_000523	176.229	318.406	252.87	83.6167	0	0	0	0	207.78	0.001	-17.6647	8.39837e-08	6.96628e-06	101123342	annot_exons
Circ_000525	744.077	250.176	455.166	306.595	0	52.7405	59.7864	50.8375	439.003	40.8411	-3.42614	3.85403e-07	2.56847e-05	101123342	annot_exons
Circ_000527	117.486	22.7433	25.287	27.8722	0	13.1851	0	0	48.3471	3.29628	-3.87452	0.0439142	0.306892	101108002	annot_exons
Circ_000533	0	0	0	0	55.527	39.5554	71.7437	0	0.001	41.7065	15.348	0.0206163	0.184553	101108702	annot_exons
Circ_000541	39.1619	0	25.287	139.361	0	0	0	0	50.9525	0.001	-15.6369	0.0246585	0.20752	101109659	annot_exons
Circ_000548	39.1619	0	126.435	111.489	0	0	0	12.7094	69.2715	3.17735	-4.44637	0.00468079	0.0614827	101110191	annot_exons
Circ_000559	58.7429	68.2299	101.148	111.489	27.7635	0	23.9146	0	84.9024	12.9195	-2.71625	0.00942054	0.104125	101110191	annot_exons
Circ_000563	39.1619	0	75.861	139.361	0	0	0	0	63.596	0.001	-15.9566	0.00775739	0.0900349	101110463	annot_exons
Circ_000564	39.1619	136.46	0	27.8722	0	0	0	0	50.8735	0.001	-15.6346	0.0223386	0.193852	101110463	annot_exons
Circ_000565	39.1619	22.7433	50.574	111.489	0	0	0	0	55.992	0.001	-15.7729	0.00563665	0.0709459	101110463	annot_exons
Circ_000566	156.648	181.946	303.444	111.489	13.8818	39.5554	0	101.675	188.382	38.7781	-2.28035	0.00337803	0.0474744	101110463	annot_exons
Circ_000568	528.686	250.176	354.018	390.211	27.7635	13.1851	23.9146	101.675	380.773	41.6346	-3.19308	4.80494e-07	3.13292e-05	101110463	annot_exons
Circ_000569	411.2	181.946	177.009	139.361	0	13.1851	0	0	227.379	3.29628	-6.10812	1.7204e-08	1.66658e-06	101110463	annot_exons
Circ_000570	39.1619	181.946	0	55.7445	0	0	0	0	69.2132	0.001	-16.0788	0.0067526	0.0813311	101110463	annot_exons
Circ_000571	117.486	136.46	0	0	0	0	0	0	63.4864	0.001	-15.9542	0.0171959	0.161448	101110463	exon_intron
Circ_000582	117.486	113.716	126.435	27.8722	0	0	0	0	96.3774	0.001	-16.5564	8.24469e-05	0.00247926	443264	annot_exons
Circ_000583	97.9048	90.9732	50.574	0	0	0	0	0	59.863	0.001	-15.8694	0.00699131	0.0832951	443264	annot_exons
Circ_000594	0	0	0	0	152.699	105.481	47.8292	114.384	0.001	105.099	16.6814	0.000116146	0.00330225	101113544	annot_exons
Circ_000596	215.391	45.4866	101.148	111.489	13.8818	26.3703	23.9146	25.4188	118.379	22.3963	-2.40207	0.00281843	0.0410784	101113806	annot_exons
Circ_000600	39.1619	68.2299	0	111.489	0	0	0	0	54.7202	0.001	-15.7398	0.012403	0.127286	100820736	annot_exons
Circ_000606	0	0	0	0	69.4088	92.2959	179.359	101.675	0.001	110.685	16.7561	7.23365e-05	0.00223979	101116520	annot_exons
Circ_000608	0	0	0	0	55.527	118.666	71.7437	152.513	0.001	99.6124	16.604	0.000168139	0.00441273	101116779	one_exon
Circ_000611	0	0	0	0	55.527	92.2959	107.616	101.675	0.001	89.2784	16.446	0.000264071	0.00623383	101117459	annot_exons
Circ_000612	0	0	0	0	124.936	184.592	131.53	152.513	0.001	148.393	17.1791	7.60878e-07	4.60671e-05	101117459	annot_exons
Circ_000613	0	0	25.287	0	69.4088	65.9257	47.8292	25.4188	6.32175	52.1456	3.04415	0.0472625	0.31929	101117459	annot_exons
Circ_000619	39.1619	68.2299	50.574	0	0	0	0	0	39.4915	0.001	-15.2693	0.0284039	0.22942	101117711	annot_exons
Circ_000621	97.9048	113.716	404.592	390.211	41.6453	13.1851	167.402	88.9657	251.606	77.7995	-1.69333	0.0359	0.268695	101117711	annot_exons
Circ_000627	78.3239	159.203	101.148	250.85	791.26	395.554	741.352	597.341	147.381	631.377	2.09895	2.66653e-05	0.000981369	101117976	annot_exons
Circ_000632	58.7429	113.716	177.009	27.8722	0	26.3703	23.9146	0	94.3352	12.5712	-2.90767	0.00365331	0.0506867	101118233	annot_exons
Circ_000641	215.391	750.529	126.435	250.85	27.7635	92.2959	35.8719	50.8375	335.801	51.6922	-2.69959	0.000392518	0.00855153	101119772	annot_exons
Circ_000681	78.3239	22.7433	50.574	55.7445	0	0	0	0	51.8464	0.001	-15.662	0.00613297	0.0756483	101122232	annot_exons
Circ_000683	39.1619	227.433	126.435	111.489	0	52.7405	71.7437	25.4188	126.13	37.4758	-1.75088	0.0390382	0.285257	101122232	annot_exons
Circ_000688	58.7429	136.46	126.435	195.106	0	0	0	0	129.186	0.001	-16.9791	9.65466e-06	0.000413701	101122232	annot_exons
Circ_000692	39.1619	45.4866	0	111.489	0	0	0	0	49.0344	0.001	-15.5815	0.0184534	0.170075	101109140	annot_exons
Circ_000693	548.267	682.299	480.453	696.806	0	26.3703	131.53	0	601.956	39.4751	-3.93064	5.2991e-07	3.43038e-05	101109140	annot_exons
Circ_000694	58.7429	68.2299	177.009	111.489	0	26.3703	11.9573	0	103.868	9.58189	-3.43829	0.00143011	0.0240486	101109140	annot_exons
Circ_000701	58.7429	159.203	151.722	27.8722	41.6453	0	0	12.7094	99.3851	13.5887	-2.87063	0.00916899	0.101801	101110473	annot_exons
Circ_000706	58.7429	68.2299	25.287	0	0	0	0	0	38.0649	0.001	-15.2162	0.0429437	0.302783	101104103	annot_exons
Circ_000728	0	0	0	0	124.936	395.554	47.8292	216.06	0.001	196.095	17.5812	1.64532e-05	0.000647718	101111511	annot_exons
Circ_000730	19.581	0	0	55.7445	69.4088	171.407	23.9146	165.222	18.8314	107.488	2.51297	0.0247497	0.208094	101111511	annot_exons
Circ_000733	19.581	45.4866	0	0	152.699	329.628	83.701	101.675	16.2669	166.926	3.3592	0.000493572	0.0102982	101111511	annot_exons
Circ_000739	0	0	0	0	41.6453	250.518	47.8292	25.4188	0.001	91.3527	16.4792	0.000933257	0.0171734	101111511	annot_exons
Circ_000743	0	0	0	0	27.7635	224.147	0	63.5469	0.001	78.8644	16.2671	0.00430574	0.0573057	101111511	annot_exons
Circ_000746	58.7429	0	25.287	83.6167	97.1723	263.703	215.231	127.094	41.9117	175.8	2.06851	0.00610457	0.0754352	101111138	one_exon
Circ_000752	0	0	0	0	41.6453	210.962	131.53	127.094	0.001	127.808	16.9636	6.354e-05	0.00202372	101112532	annot_exons
Circ_000759	97.9048	0	202.296	139.361	0	26.3703	35.8719	0	109.891	15.5605	-2.8201	0.0150437	0.145991	101114828	annot_exons
Circ_000793	0	0	531.027	0	0	0	0	0	132.757	0.001	-17.0184	0.0119478	0.124213	101119773	antisense
Circ_000797	0	0	0	0	69.4088	79.1108	71.7437	25.4188	0.001	61.4205	15.9064	0.000941529	0.0173139	101121383	annot_exons
Circ_000802	19.581	68.2299	25.287	55.7445	0	0	0	0	42.2106	0.001	-15.3653	0.0176802	0.164854	101121894	annot_exons
Circ_000810	78.3239	0	101.148	27.8722	0	0	0	0	51.836	0.001	-15.6617	0.0183796	0.169568	101123510	annot_exons
Circ_000811	58.7429	136.46	75.861	222.978	0	0	0	12.7094	123.51	3.17735	-5.28067	2.06832e-05	0.000791271	101123510	annot_exons
Circ_000817	195.81	90.9732	50.574	139.361	0	0	0	0	119.18	0.001	-16.8628	1.58647e-05	0.000626984	101123510	annot_exons
Circ_000818	58.7429	204.69	227.583	195.106	0	0	23.9146	38.1282	171.53	15.5107	-3.46713	0.000122269	0.00344026	101123510	annot_exons
Circ_000819	0	22.7433	151.722	111.489	0	0	11.9573	0	71.4886	2.98932	-4.57982	0.00684614	0.0819844	101123510	annot_exons
Circ_000828	0	0	0	0	27.7635	65.9257	23.9146	38.1282	0.001	38.933	15.2487	0.0164336	0.156019	101116113	one_exon
Circ_000830	58.7429	136.46	75.861	222.978	0	0	0	0	123.51	0.001	-16.9143	2.19419e-05	0.000828902	101102944	annot_exons
Circ_000831	58.7429	136.46	126.435	27.8722	0	0	11.9573	0	87.3775	2.98932	-4.86937	0.000230517	0.0056228	101102944	annot_exons
Circ_000841	352.457	409.379	202.296	195.106	55.527	145.036	11.9573	38.1282	289.81	62.6622	-2.20944	0.00137671	0.0233533	101117131	annot_exons
Circ_000843	137.067	181.946	25.287	0	27.7635	0	0	25.4188	86.075	13.2956	-2.69465	0.0452448	0.31124	101117131	annot_exons
Circ_000859	58.7429	68.2299	278.157	306.595	27.7635	52.7405	23.9146	38.1282	177.931	35.6367	-2.31988	0.00669968	0.0808895	101117639	one_exon
Circ_000866	0	0	0	0	27.7635	65.9257	191.317	12.7094	0.001	74.4288	16.1836	0.00193828	0.0307091	101107561	annot_exons
Circ_000872	19.581	90.9732	50.574	0	0	0	0	0	40.282	0.001	-15.2978	0.0373283	0.276411	101107830	annot_exons
Circ_000874	195.81	250.176	177.009	55.7445	0	0	0	0	169.685	0.001	-17.3725	7.37124e-07	4.4829e-05	101107830	annot_exons
Circ_000902	156.648	45.4866	278.157	111.489	13.8818	0	0	0	147.945	3.47044	-5.4138	7.96866e-06	0.000354331	101111921	annot_exons
Circ_000918	137.067	204.69	480.453	139.361	0	0	0	0	240.393	0.001	-17.875	7.65232e-08	6.40622e-06	101113636	antisense
Circ_000919	176.229	181.946	50.574	27.8722	13.8818	13.1851	0	12.7094	109.155	9.94407	-3.4564	0.00149665	0.0249356	100302550	annot_exons
Circ_000920	0	0	0	0	27.7635	26.3703	47.8292	25.4188	0.001	31.8454	14.9588	0.0238538	0.202421	100302550	antisense
Circ_000926	0	0	0	0	138.818	52.7405	119.573	88.9657	0.001	100.024	16.61	0.000129714	0.003616	101117548	annot_exons
Circ_000928	19.581	113.716	0	0	124.936	224.147	83.701	190.641	33.3244	155.856	2.22557	0.0156246	0.150019	101117548	annot_exons
Circ_000936	117.486	45.4866	0	83.6167	0	0	0	0	61.6473	0.001	-15.9117	0.00614313	0.0757171	101120709	annot_exons
Circ_000943	0	45.4866	25.287	0	69.4088	65.9257	95.6583	127.094	17.6934	89.5217	2.33903	0.0197015	0.178286	101121132	annot_exons
Circ_000965	156.648	0	177.009	195.106	13.8818	0	0	0	132.191	3.47044	-5.25136	0.000149117	0.00402962	101121642	annot_exons
Circ_000971	156.648	90.9732	252.87	27.8722	0	0	35.8719	0	132.091	8.96797	-3.88061	0.00123739	0.021405	101122644	annot_exons
Circ_000972	0	0	0	0	0	65.9257	71.7437	50.8375	0.001	47.1267	15.5243	0.0130676	0.132157	101122644	annot_exons
Circ_000980	0	22.7433	0	0	166.581	210.962	227.188	50.8375	5.68582	163.892	4.84923	4.01849e-05	0.0014028	101103105	annot_exons
Circ_000986	0	0	0	0	1707.46	1160.29	1626.19	1563.25	0.001	1514.3	20.5302	6.84005e-31	1.68663e-27	101103105	annot_exons
Circ_001003	39.1619	45.4866	25.287	111.489	0	0	0	0	55.3561	0.001	-15.7565	0.00548574	0.0695408	101108092	exon_intron
Circ_001020	0	0	0	0	27.7635	52.7405	71.7437	25.4188	0.001	44.4166	15.4388	0.00695509	0.0830326	NA	intergenic
Circ_001021	0	0	0	0	27.7635	52.7405	59.7864	38.1282	0.001	44.6047	15.4449	0.00551159	0.0697928	NA	intergenic
Circ_001023	1057.37	1501.06	1795.38	780.423	83.2905	39.5554	95.6583	241.478	1283.56	114.996	-3.4805	5.75937e-09	6.27379e-07	101112775	annot_exons
Circ_001037	313.295	90.9732	202.296	362.339	416.453	857.034	753.309	686.307	242.226	678.276	1.48552	0.00329687	0.0465266	101117032	annot_exons
Circ_001038	156.648	386.636	151.722	250.85	41.6453	52.7405	83.701	12.7094	236.464	47.6991	-2.30959	0.000561373	0.01144	101117032	annot_exons
Circ_001040	39.1619	204.69	303.444	195.106	41.6453	0	0	25.4188	185.6	16.766	-3.46859	0.000230323	0.0056228	101117032	annot_exons
Circ_001054	97.9048	45.4866	50.574	27.8722	263.753	197.777	167.402	241.478	55.4594	217.603	1.97219	0.000860341	0.0161159	443456	annot_exons
Circ_001062	0	68.2299	126.435	0	0	0	0	0	48.6662	0.001	-15.5706	0.0428563	0.302555	101118910	annot_exons
Circ_001078	19.581	0	0	0	83.2905	65.9257	107.616	50.8375	4.89524	76.9173	3.97386	0.00372041	0.051381	101119595	exon_intron
Circ_001084	0	0	0	0	41.6453	0	143.487	12.7094	0.001	49.4605	15.594	0.0238128	0.202412	101121386	exon_intron
Circ_001088	0	0	0	0	27.7635	13.1851	47.8292	38.1282	0.001	31.7265	14.9534	0.0416039	0.296765	101121386	exon_intron
Circ_001127	0	0	0	0	69.4088	26.3703	35.8719	38.1282	0.001	42.4448	15.3733	0.00984449	0.10767	101108177	annot_exons
Circ_001144	0	0	0	0	97.1723	184.592	0	203.35	0.001	121.279	16.888	0.000270117	0.00634893	101109497	annot_exons
Circ_001145	19.581	0	25.287	0	69.4088	92.2959	71.7437	25.4188	11.217	64.7168	2.52845	0.0321915	0.248835	101109497	annot_exons
Circ_001163	0	0	0	0	13.8818	26.3703	35.8719	38.1282	0.001	28.563	14.8019	0.0406051	0.292919	101109497	annot_exons
Circ_001182	0	0	0	0	111.054	65.9257	0	101.675	0.001	69.6637	16.0881	0.00235226	0.0354854	101112695	exon_intron
Circ_001183	0	0	0	0	55.527	65.9257	0	114.384	0.001	58.9593	15.8474	0.00534228	0.0683187	101112695	exon_intron
Circ_001194	0	0	0	0	638.561	1489.92	131.53	203.35	0.001	615.84	19.2322	1.43135e-07	1.11885e-05	101112943	annot_exons
Circ_001196	0	0	0	0	124.936	224.147	71.7437	50.8375	0.001	117.916	16.8474	0.000155671	0.00416001	101112943	exon_intron
Circ_001197	0	0	0	0	69.4088	52.7405	59.7864	25.4188	0.001	51.8386	15.6617	0.0034477	0.0483029	101112943	exon_intron
Circ_001200	19.581	0	0	0	55.527	316.443	23.9146	12.7094	4.89524	102.149	4.38314	0.00662499	0.0803766	101112943	exon_intron
Circ_001201	0	0	0	0	83.2905	131.851	11.9573	12.7094	0.001	59.9521	15.8715	0.00708775	0.0840246	101112943	antisense
Circ_001202	0	0	0	0	138.818	92.2959	143.487	25.4188	0.001	100.005	16.6097	6.04333e-05	0.00195608	101112943	exon_intron
Circ_001206	0	0	0	0	527.507	1081.18	167.402	660.888	0.001	609.244	19.2167	3.6309e-10	5.1294e-08	101112943	exon_intron
Circ_001207	19.581	0	0	0	791.26	1173.48	215.231	699.016	4.89524	719.746	7.19996	9.13043e-11	1.50093e-08	101112943	exon_intron
Circ_001208	0	0	0	0	55.527	79.1108	11.9573	12.7094	0.001	39.8261	15.2814	0.028505	0.229905	101112943	annot_exons
Circ_001212	0	0	25.287	27.8722	41.6453	92.2959	131.53	165.222	13.2898	107.673	3.01827	0.00489635	0.0635173	101114572	antisense
Circ_001213	0	22.7433	75.861	27.8722	55.527	39.5554	191.317	203.35	31.6191	122.437	1.95317	0.0456707	0.312742	101114572	one_exon
Circ_001239	0	0	0	0	55.527	26.3703	23.9146	12.7094	0.001	29.6303	14.8548	0.0467172	0.316884	101120207	annot_exons
Circ_001253	234.972	159.203	227.583	334.467	13.8818	13.1851	0	0	239.056	6.76672	-5.14275	5.99679e-09	6.50628e-07	101117043	annot_exons
Circ_001254	293.715	318.406	429.879	585.317	0	0	23.9146	0	406.829	5.97864	-6.08846	2.15002e-13	6.33881e-11	101117043	annot_exons
Circ_001262	0	0	25.287	0	27.7635	65.9257	59.7864	63.5469	6.32175	54.2556	3.10138	0.0309135	0.24213	101107318	annot_exons
Circ_001271	0	0	0	0	263.753	250.518	298.932	216.06	0.001	257.316	17.9732	5.1264e-11	8.91336e-09	101110552	antisense
Circ_001273	97.9048	68.2299	151.722	55.7445	0	13.1851	47.8292	12.7094	93.4003	18.4309	-2.3413	0.0116725	0.122129	101113547	intronic
Circ_001289	0	0	0	0	166.581	0	35.8719	139.803	0.001	85.564	16.3847	0.00177639	0.0285444	101118328	one_exon
Circ_001295	234.972	45.4866	151.722	167.233	13.8818	79.1108	47.8292	38.1282	149.853	44.7375	-1.744	0.0206931	0.18473	101118328	annot_exons
Circ_001307	19.581	0	0	0	0	39.5554	35.8719	139.803	4.89524	53.8076	3.45836	0.039279	0.286692	101106983	exon_intron
Circ_001311	0	0	0	0	55.527	26.3703	83.701	25.4188	0.001	47.7543	15.5433	0.00752033	0.0878851	101102613	exon_intron
Circ_001325	0	0	0	0	13.8818	39.5554	11.9573	88.9657	0.001	38.59	15.2359	0.0299074	0.236435	101102613	annot_exons
Circ_001334	0	0	0	0	97.1723	118.666	203.274	63.5469	0.001	120.665	16.8806	4.31096e-05	0.00149146	101102613	annot_exons
Circ_001335	0	0	0	0	41.6453	39.5554	71.7437	25.4188	0.001	44.5908	15.4445	0.00629582	0.0772495	101102613	annot_exons
Circ_001336	0	0	0	0	27.7635	26.3703	47.8292	76.2563	0.001	44.5548	15.4433	0.00708728	0.0840246	101102613	annot_exons
Circ_001355	19.581	0	0	0	97.1723	52.7405	35.8719	38.1282	4.89524	55.9782	3.51541	0.0118998	0.123856	101106133	exon_intron
Circ_001356	0	0	0	0	111.054	79.1108	71.7437	139.803	0.001	100.428	16.6158	9.30437e-05	0.00273521	101106133	antisense
Circ_001361	0	0	0	0	55.527	0	47.8292	38.1282	0.001	35.3711	15.1103	0.0394689	0.287475	101119775	annot_exons
Circ_001416	391.619	0	0	0	0	0	0	0	97.9048	0.001	-16.5791	0.0168574	0.15933	101112936	antisense
Circ_001417	0	0	0	0	152.699	171.407	155.445	203.35	0.001	170.725	17.3813	9.03023e-08	7.35544e-06	101118148	exon_intron
Circ_001433	313.295	250.176	202.296	195.106	55.527	79.1108	59.7864	101.675	240.218	74.0248	-1.69827	0.000773072	0.0147668	541606	annot_exons
Circ_001452	0	22.7433	0	0	111.054	39.5554	95.6583	88.9657	5.68582	83.8084	3.88165	0.00222751	0.0340965	NA	intergenic
Circ_001454	0	0	0	0	194.345	118.666	83.701	12.7094	0.001	102.355	16.6432	0.000204766	0.00512369	101110805	annot_exons
Circ_001464	0	0	0	0	41.6453	13.1851	11.9573	63.5469	0.001	32.5837	14.9919	0.0382212	0.280805	101113550	annot_exons
Circ_001479	0	0	0	0	124.936	13.1851	47.8292	88.9657	0.001	68.7289	16.0686	0.00148548	0.0247976	101111248	annot_exons
Circ_001480	58.7429	0	0	0	69.4088	210.962	155.445	165.222	14.6857	150.259	3.35497	0.000680836	0.0134013	101111248	annot_exons
Circ_001489	0	0	0	0	27.7635	39.5554	59.7864	76.2563	0.001	50.8404	15.6337	0.0037094	0.0512551	101111248	annot_exons
Circ_001511	0	0	0	0	13.8818	26.3703	47.8292	63.5469	0.001	37.907	15.2102	0.0193289	0.175696	101116363	annot_exons
Circ_001521	0	0	0	0	235.99	158.222	215.231	0	0.001	152.361	17.2171	9.18854e-05	0.00270902	101111513	annot_exons
Circ_001525	0	0	0	0	13.8818	79.1108	23.9146	25.4188	0.001	35.5815	15.1188	0.0354192	0.266253	101111513	one_exon
Circ_001553	0	0	0	0	69.4088	13.1851	0	88.9657	0.001	42.8899	15.3884	0.0320158	0.24783	101101853	exon_intron
Circ_001571	19.581	0	0	0	166.581	0	0	101.675	4.89524	67.064	3.77609	0.0402811	0.291609	101114080	annot_exons
Circ_001576	0	0	0	0	124.936	158.222	71.7437	190.641	0.001	136.385	17.0573	9.16223e-06	0.000395835	NA	intergenic
Circ_001580	19.581	0	25.287	0	208.226	145.036	83.701	114.384	11.217	137.837	3.61921	0.000136327	0.00375405	101114330	annot_exons
Circ_001593	0	0	0	0	97.1723	26.3703	71.7437	25.4188	0.001	55.1763	15.7518	0.00372269	0.0513864	101103280	annot_exons
Circ_001596	0	0	0	0	41.6453	39.5554	11.9573	50.8375	0.001	35.9989	15.1357	0.0267183	0.219741	101103280	annot_exons
Circ_001604	117.486	0	50.574	27.8722	0	0	0	0	48.983	0.001	-15.58	0.0207331	0.184876	101107319	intronic
Circ_001613	0	68.2299	0	195.106	0	0	0	0	65.8339	0.001	-16.0065	0.0238969	0.202619	101109928	annot_exons
Circ_001620	156.648	45.4866	75.861	111.489	0	0	0	0	97.3711	0.001	-16.5712	7.09859e-05	0.00220805	101110635	annot_exons
Circ_001632	19.581	113.716	50.574	0	0	0	0	0	45.9679	0.001	-15.4883	0.0290746	0.232655	101111593	annot_exons
Circ_001636	234.972	204.69	202.296	390.211	27.7635	92.2959	107.616	76.2563	258.042	75.9828	-1.76386	0.00142021	0.0239401	101118411	annot_exons
Circ_001638	2036.42	3184.06	1947.1	1839.57	888.432	672.442	1183.77	711.726	2251.79	864.093	-1.38181	6.00026e-05	0.00194446	101118411	annot_exons
Circ_001654	117.486	90.9732	227.583	111.489	0	0	11.9573	0	136.883	2.98932	-5.51698	1.89922e-06	0.00010386	NA	intergenic
Circ_001671	19.581	0	0	0	27.7635	65.9257	47.8292	63.5469	4.89524	51.2663	3.38856	0.0156669	0.150264	101116878	annot_exons
Circ_001688	117.486	68.2299	0	27.8722	0	0	0	0	53.397	0.001	-15.7045	0.01353	0.13522	101122756	annot_exons
Circ_001697	0	181.946	50.574	55.7445	0	0	11.9573	25.4188	72.0662	9.34402	-2.94721	0.0394541	0.287444	100125614	annot_exons
Circ_001706	39.1619	181.946	0	0	0	0	0	0	55.2771	0.001	-15.7544	0.0342705	0.260306	100125614	annot_exons
Circ_001720	137.067	136.46	278.157	27.8722	0	13.1851	0	0	144.889	3.29628	-5.45796	1.46278e-05	0.000587798	101120124	annot_exons
Circ_001734	0	0	0	0	69.4088	39.5554	35.8719	25.4188	0.001	42.5637	15.3773	0.00989218	0.108061	NA	intergenic
Circ_001754	19.581	0	0	0	13.8818	39.5554	179.359	12.7094	4.89524	61.3765	3.64823	0.0320371	0.247896	101103442	annot_exons
Circ_001756	0	0	0	0	111.054	197.777	59.7864	127.094	0.001	123.928	16.9191	3.85654e-05	0.00135323	101103442	annot_exons
Circ_001762	0	0	0	0	41.6453	65.9257	107.616	38.1282	0.001	63.3287	15.9506	0.00100339	0.0181199	101103688	one_exon
Circ_001763	39.1619	45.4866	0	83.6167	0	0	0	0	42.0663	0.001	-15.3604	0.0310811	0.242742	101106812	annot_exons
Circ_001764	58.7429	90.9732	50.574	0	0	0	0	0	50.0725	0.001	-15.6117	0.0142416	0.140183	101106812	annot_exons
Circ_001777	234.972	159.203	126.435	222.978	0	26.3703	0	0	185.897	6.59257	-4.81752	2.35225e-07	1.69237e-05	101109499	annot_exons
Circ_001778	0	136.46	0	195.106	0	0	0	0	82.8914	0.001	-16.3389	0.00949389	0.104663	101109499	annot_exons
Circ_001780	332.876	136.46	303.444	83.6167	0	13.1851	23.9146	0	214.099	9.27493	-4.5288	1.09365e-06	6.39311e-05	101109499	annot_exons
Circ_001786	0	0	0	0	97.1723	13.1851	35.8719	101.675	0.001	61.9761	15.9194	0.00239255	0.0360131	101109327	annot_exons
Circ_001792	176.229	886.989	126.435	195.106	13.8818	26.3703	59.7864	38.1282	346.189	34.5417	-3.32515	0.000141879	0.00387733	101111506	annot_exons
Circ_001807	58.7429	0	75.861	139.361	0	0	0	0	68.4913	0.001	-16.0636	0.00474281	0.062057	101114151	annot_exons
Circ_001808	78.3239	22.7433	0	139.361	0	13.1851	0	0	60.1071	3.29628	-4.18862	0.0393616	0.287001	101114151	annot_exons
Circ_001812	137.067	22.7433	354.018	195.106	69.4088	39.5554	47.8292	50.8375	177.233	51.9077	-1.77163	0.0254761	0.212816	101114404	annot_exons
Circ_001819	19.581	113.716	50.574	55.7445	0	0	0	25.4188	59.904	6.35469	-3.23676	0.017773	0.165494	101114404	annot_exons
Circ_001824	117.486	68.2299	25.287	55.7445	13.8818	0	23.9146	0	66.6868	9.44908	-2.81915	0.0174479	0.163305	101114404	annot_exons
Circ_001825	19.581	113.716	101.148	111.489	0	0	0	25.4188	86.4836	6.35469	-3.76653	0.00173568	0.028073	101114404	annot_exons
Circ_001835	0	0	0	0	69.4088	145.036	35.8719	101.675	0.001	87.998	16.4252	0.000101201	0.0029202	101115417	antisense
Circ_001859	97.9048	45.4866	25.287	0	0	0	0	0	42.1696	0.001	-15.3639	0.0255598	0.213332	101112697	annot_exons
Circ_001861	254.553	45.4866	227.583	0	0	0	11.9573	0	131.906	2.98932	-5.46354	0.000348003	0.00774977	101112697	annot_exons
Circ_001877	1683.96	705.042	758.61	557.445	0	52.7405	23.9146	50.8375	926.265	31.8732	-4.86101	1.03699e-11	2.14786e-09	101113983	annot_exons
Circ_001879	156.648	68.2299	25.287	0	0	0	0	0	62.5412	0.001	-15.9325	0.00863957	0.0972364	101113983	annot_exons
Circ_001880	97.9048	136.46	75.861	167.233	0	0	0	0	119.365	0.001	-16.865	1.04645e-05	0.000442118	101113983	annot_exons
Circ_001881	19.581	22.7433	101.148	27.8722	0	0	0	0	42.8361	0.001	-15.3865	0.0241496	0.204188	101113983	annot_exons
Circ_001882	78.3239	0	151.722	0	0	0	0	0	57.5115	0.001	-15.8116	0.0249603	0.209346	101113983	annot_exons
Circ_001887	19.581	136.46	101.148	195.106	0	0	23.9146	0	113.074	5.97864	-4.2413	0.000753489	0.0145051	101118837	one_exon
Circ_001890	293.715	523.096	354.018	418.084	13.8818	39.5554	0	12.7094	397.228	16.5366	-4.58623	3.01774e-12	7.1801e-10	101118837	annot_exons
Circ_001891	97.9048	113.716	25.287	111.489	0	13.1851	11.9573	0	87.0993	6.28561	-3.79254	0.000993812	0.0180068	101118837	annot_exons
Circ_001904	97.9048	113.716	126.435	195.106	0	0	0	0	133.29	0.001	-17.0242	2.77764e-06	0.000142961	101120715	annot_exons
Circ_001911	39.1619	159.203	0	0	0	0	0	0	49.5913	0.001	-15.5978	0.043302	0.304359	101123082	annot_exons
Circ_001951	0	90.9732	25.287	111.489	0	0	0	0	56.9373	0.001	-15.7971	0.0156557	0.150264	101105202	annot_exons
Circ_001955	0	0	0	0	55.527	145.036	59.7864	38.1282	0.001	74.6195	16.1873	0.000351922	0.00781177	101105708	annot_exons
Circ_001964	0	0	50.574	0	97.1723	65.9257	59.7864	63.5469	12.6435	71.6078	2.50172	0.0172796	0.162121	100169938	annot_exons
Circ_001979	78.3239	90.9732	50.574	111.489	0	0	23.9146	0	82.84	5.97864	-3.79244	0.000969631	0.0176673	101109405	annot_exons
Circ_002004	156.648	22.7433	0	27.8722	0	0	0	0	51.8158	0.001	-15.6611	0.0213593	0.188463	101119362	annot_exons
Circ_002005	39.1619	45.4866	75.861	111.489	0	0	0	0	67.9996	0.001	-16.0532	0.00154221	0.0255066	101119362	annot_exons
Circ_002011	0	0	0	27.8722	124.936	39.5554	83.701	114.384	6.96806	90.6442	3.70139	0.00195062	0.0308145	101115085	annot_exons
Circ_002012	0	0	0	0	55.527	26.3703	35.8719	114.384	0.001	58.0384	15.8247	0.00246996	0.036851	101115085	annot_exons
Circ_002027	0	0	0	0	41.6453	118.666	107.616	165.222	0.001	108.287	16.7245	0.00011918	0.00336733	101116109	annot_exons
Circ_002030	0	0	0	0	13.8818	52.7405	35.8719	63.5469	0.001	41.5103	15.3412	0.0119111	0.123926	101120630	annot_exons
Circ_002033	0	0	0	0	13.8818	171.407	47.8292	203.35	0.001	109.117	16.7355	0.00025001	0.00598571	101120630	annot_exons
Circ_002036	0	0	0	0	41.6453	105.481	23.9146	38.1282	0.001	52.2923	15.6743	0.00555542	0.0701841	101120630	annot_exons
Circ_002038	0	0	0	0	111.054	79.1108	35.8719	139.803	0.001	91.46	16.4809	6.35523e-05	0.00202372	101120630	annot_exons
Circ_002051	0	0	0	0	194.345	118.666	143.487	88.9657	0.001	136.366	17.0571	5.71582e-06	0.000266843	101120630	annot_exons
Circ_002052	39.1619	0	50.574	55.7445	166.581	131.851	131.53	63.5469	36.3701	123.377	1.76225	0.0225798	0.195112	101120630	annot_exons
Circ_002057	254.553	159.203	252.87	0	27.7635	26.3703	23.9146	0	166.656	19.5121	-3.09444	0.00327279	0.0462591	101116528	annot_exons
Circ_002062	78.3239	0	50.574	195.106	0	13.1851	11.9573	0	81.0009	6.28561	-3.68781	0.0101391	0.109917	101120887	annot_exons
Circ_002069	19.581	181.946	0	27.8722	0	0	0	0	57.3499	0.001	-15.8075	0.0190571	0.1741	101117035	annot_exons
Circ_002082	234.972	227.433	101.148	139.361	13.8818	13.1851	0	12.7094	175.728	9.94407	-4.14337	5.69943e-07	3.6189e-05	101117464	annot_exons
Circ_002089	58.7429	113.716	101.148	139.361	27.7635	52.7405	23.9146	12.7094	103.242	29.282	-1.81795	0.0209392	0.186248	101117718	annot_exons
Circ_002096	0	0	0	0	41.6453	52.7405	59.7864	38.1282	0.001	48.0751	15.553	0.00461087	0.0609183	101117718	annot_exons
Circ_002110	313.295	159.203	151.722	418.084	55.527	145.036	179.359	38.1282	260.576	104.513	-1.31803	0.0398424	0.289157	101119355	annot_exons
Circ_002118	234.972	22.7433	25.287	27.8722	0	0	0	0	77.7185	0.001	-16.246	0.00271111	0.0398786	101119355	annot_exons
Circ_002119	0	0	0	0	41.6453	26.3703	83.701	76.2563	0.001	56.9932	15.7985	0.00175033	0.0282723	101119355	annot_exons
Circ_002128	39.1619	0	75.861	167.233	13.8818	0	11.9573	0	70.5641	6.45976	-3.44938	0.0182817	0.169009	100885768	annot_exons
Circ_002132	0	0	0	0	13.8818	0	107.616	50.8375	0.001	43.0837	15.3949	0.0331951	0.254274	101121477	annot_exons
Circ_002142	58.7429	113.716	50.574	0	0	0	0	0	55.7583	0.001	-15.7669	0.0106052	0.113593	101101942	annot_exons
Circ_002153	58.7429	68.2299	75.861	139.361	0	0	35.8719	0	85.5487	8.96797	-3.25389	0.00539923	0.0688523	101103028	annot_exons
Circ_002164	0	0	0	0	83.2905	39.5554	71.7437	0	0.001	48.6474	15.5701	0.0143498	0.140972	101102615	annot_exons
Circ_002168	0	22.7433	101.148	195.106	0	13.1851	0	0	79.7492	3.29628	-4.59656	0.0187302	0.172099	101102615	annot_exons
Circ_002178	78.3239	181.946	0	83.6167	0	26.3703	0	0	85.9717	6.59257	-3.70495	0.00663843	0.0803842	101106813	annot_exons
Circ_002188	19.581	0	25.287	55.7445	41.6453	171.407	131.53	241.478	25.1531	146.515	2.54224	0.00420451	0.0563177	101104368	annot_exons
Circ_002195	0	0	0	0	138.818	52.7405	59.7864	88.9657	0.001	85.0776	16.3765	0.000661843	0.0131035	NA	intergenic
Circ_002203	39.1619	136.46	25.287	0	0	0	11.9573	0	50.2272	2.98932	-4.07058	0.0197804	0.178782	101112781	annot_exons
Circ_002204	0	0	0	0	124.936	105.481	35.8719	12.7094	0.001	69.7495	16.0899	0.00189842	0.0302187	101114152	one_exon
Circ_002207	0	0	25.287	55.7445	124.936	52.7405	131.53	127.094	20.2579	109.075	2.42877	0.00653192	0.0794493	101114152	annot_exons
Circ_002252	78.3239	45.4866	50.574	111.489	0	0	11.9573	0	71.4684	2.98932	-4.57941	0.000743481	0.0143327	101109507	annot_exons
Circ_002260	156.648	0	50.574	55.7445	0	0	11.9573	25.4188	65.7416	9.34402	-2.81469	0.0446102	0.309306	101109765	annot_exons
Circ_002264	97.9048	136.46	101.148	27.8722	13.8818	0	0	0	90.8462	3.47044	-4.71024	0.000115587	0.00329673	101103689	annot_exons
Circ_002265	176.229	0	126.435	139.361	0	0	0	12.7094	110.506	3.17735	-5.12016	0.000335176	0.00754465	101103689	annot_exons
Circ_002283	58.7429	22.7433	0	55.7445	0	0	0	0	34.3077	0.001	-15.0662	0.0464649	0.31578	101107750	annot_exons
Circ_002297	195.81	318.406	227.583	139.361	13.8818	26.3703	0	0	220.29	10.063	-4.45227	3.786e-08	3.35593e-06	101110015	annot_exons
Circ_002302	117.486	68.2299	75.861	167.233	69.4088	26.3703	0	25.4188	107.203	30.2995	-1.82298	0.0195062	0.176919	101111508	annot_exons
Circ_002306	0	181.946	0	27.8722	0	0	0	0	52.4547	0.001	-15.6788	0.0439455	0.306892	101111508	annot_exons
Circ_002311	0	0	0	0	27.7635	52.7405	83.701	76.2563	0.001	60.1153	15.8754	0.00141664	0.023896	101111764	annot_exons
Circ_002312	19.581	45.4866	75.861	83.6167	0	0	0	0	56.1363	0.001	-15.7766	0.00481936	0.0627562	101111764	one_exon
Circ_002317	0	0	0	0	124.936	39.5554	23.9146	0	0.001	47.1014	15.5235	0.0234158	0.199852	101112876	annot_exons
Circ_002323	78.3239	90.9732	25.287	0	13.8818	0	11.9573	0	48.646	6.45976	-2.91277	0.0487159	0.325001	101114406	annot_exons
Circ_002336	39.1619	68.2299	0	195.106	0	13.1851	0	0	75.6244	3.29628	-4.51994	0.0182801	0.169009	101114661	annot_exons
Circ_002337	195.81	113.716	0	111.489	41.6453	26.3703	11.9573	0	105.254	19.9932	-2.39629	0.0214595	0.188863	101114661	annot_exons
Circ_002339	117.486	22.7433	50.574	55.7445	27.7635	0	0	0	61.6369	6.94088	-3.1506	0.0120337	0.124645	101114661	annot_exons
Circ_002352	78.3239	22.7433	0	0	291.517	118.666	143.487	368.572	25.2668	230.561	3.18983	0.000495501	0.0103305	101118840	annot_exons
Circ_002361	19.581	22.7433	0	27.8722	13.8818	158.222	107.616	152.513	17.5491	108.058	2.62233	0.0168606	0.15933	101118840	annot_exons
Circ_002365	137.067	250.176	151.722	250.85	0	26.3703	0	0	197.454	6.59257	-4.90453	1.76988e-07	1.35229e-05	101119522	annot_exons
Circ_002392	0	0	0	0	111.054	79.1108	83.701	165.222	0.001	109.772	16.7442	5.30202e-05	0.00175595	101123519	annot_exons
Circ_002403	19.581	22.7433	0	250.85	0	0	0	0	73.2936	0.001	-16.1614	0.0124931	0.128067	101102774	annot_exons
Circ_002407	39.1619	45.4866	75.861	0	0	0	0	0	40.1274	0.001	-15.2923	0.0294889	0.234562	101104030	annot_exons
Circ_002411	156.648	318.406	278.157	83.6167	13.8818	39.5554	35.8719	12.7094	209.207	25.5046	-3.0361	7.66805e-05	0.00234221	101104030	annot_exons
Circ_002421	117.486	204.69	278.157	195.106	41.6453	105.481	0	0	198.86	36.7816	-2.43469	0.00368445	0.0510144	101106049	annot_exons
Circ_002427	391.619	68.2299	202.296	167.233	1443.7	1740.44	1363.13	1207.39	207.345	1438.67	2.79463	3.82754e-08	3.37072e-06	101106299	annot_exons
Circ_002429	0	0	0	0	55.527	52.7405	59.7864	88.9657	0.001	64.2549	15.9715	0.000605696	0.0121605	101106299	annot_exons
Circ_002435	19.581	45.4866	25.287	83.6167	97.1723	263.703	215.231	203.35	43.4928	194.864	2.16362	0.0017666	0.0284207	101106299	annot_exons
Circ_002447	0	68.2299	75.861	55.7445	13.8818	0	0	12.7094	49.9588	6.64779	-2.90979	0.0434774	0.305361	101119786	annot_exons
Circ_002469	0	0	25.287	0	152.699	382.369	47.8292	0	6.32175	145.724	4.52677	0.00608701	0.0752578	101110988	intronic
Circ_002474	156.648	272.92	75.861	111.489	27.7635	0	23.9146	0	154.229	12.9195	-3.57745	6.08614e-05	0.00196759	101111850	annot_exons
Circ_002475	234.972	227.433	50.574	139.361	0	13.1851	107.616	0	163.085	30.2002	-2.43299	0.0199864	0.180403	101111850	annot_exons
Circ_002481	117.486	22.7433	126.435	83.6167	0	0	0	0	87.5702	0.001	-16.4182	0.00023408	0.00569434	101112618	annot_exons
Circ_002482	19.581	45.4866	126.435	0	0	0	0	0	47.8756	0.001	-15.547	0.030662	0.240786	101112618	annot_exons
Circ_002499	117.486	0	151.722	0	13.8818	0	11.9573	0	67.302	6.45976	-3.3811	0.0361253	0.269444	101114918	intronic
Circ_002500	97.9048	0	75.861	0	0	0	0	0	43.4415	0.001	-15.4068	0.0483076	0.32329	101114918	annot_exons
Circ_002502	254.553	432.123	202.296	167.233	27.7635	13.1851	23.9146	0	264.051	16.2158	-4.02534	1.90454e-07	1.4192e-05	101114918	annot_exons
Circ_002515	0	22.7433	0	0	69.4088	13.1851	107.616	127.094	5.68582	79.3258	3.80235	0.00816392	0.0933944	101123345	annot_exons
Circ_002525	19.581	22.7433	25.287	0	83.2905	105.481	107.616	139.803	16.9028	109.048	2.68962	0.002674	0.0393754	101123345	annot_exons
Circ_002527	195.81	113.716	101.148	0	222.108	435.109	251.103	355.863	102.669	316.046	1.62214	0.0148898	0.144913	101123345	annot_exons
Circ_002531	58.7429	181.946	177.009	27.8722	13.8818	13.1851	23.9146	63.5469	111.393	28.6321	-1.95995	0.0295296	0.234817	101120374	annot_exons
Circ_002535	0	0	0	0	41.6453	39.5554	83.701	63.5469	0.001	57.1122	15.8015	0.00130501	0.0223467	443053	annot_exons
Circ_002538	234.972	68.2299	151.722	167.233	13.8818	13.1851	11.9573	38.1282	155.539	19.2881	-3.0115	0.000265292	0.0062572	101122241	annot_exons
Circ_002550	0	0	0	0	111.054	158.222	23.9146	38.1282	0.001	82.8296	16.3379	0.000580433	0.0117402	101123173	antisense
Circ_002553	0	0	0	0	111.054	52.7405	83.701	38.1282	0.001	71.4059	16.1238	0.000351938	0.00781177	101102113	antisense
Circ_002554	0	45.4866	25.287	0	27.7635	65.9257	95.6583	165.222	17.6934	88.6424	2.32479	0.0397264	0.288652	101102113	exon_intron
Circ_002556	58.7429	181.946	202.296	55.7445	0	26.3703	35.8719	0	124.682	15.5605	-3.0023	0.00214876	0.0331908	101102861	annot_exons
Circ_002557	0	22.7433	0	27.8722	124.936	105.481	83.701	63.5469	12.6539	94.4162	2.89945	0.00585214	0.0731153	NA	intergenic
Circ_002562	0	0	0	0	27.7635	65.9257	11.9573	76.2563	0.001	45.4757	15.4728	0.010158	0.109991	101103112	annot_exons
Circ_002569	254.553	432.123	657.462	139.361	13.8818	0	47.8292	101.675	370.875	40.8465	-3.18265	0.00015376	0.00413338	NA	intergenic
Circ_002576	58.7429	0	50.574	195.106	0	0	0	0	76.1056	0.001	-16.2157	0.00491284	0.0636978	101104449	annot_exons
Circ_002578	293.715	0	75.861	278.722	0	26.3703	0	0	162.074	6.59257	-4.61967	0.0010366	0.0186203	101104952	annot_exons
Circ_002579	0	22.7433	50.574	139.361	0	0	0	0	53.1696	0.001	-15.6983	0.025456	0.212779	101104952	annot_exons
Circ_002580	274.134	0	75.861	83.6167	0	0	35.8719	0	108.403	8.96797	-3.59548	0.0127091	0.129546	101104952	annot_exons
Circ_002584	39.1619	68.2299	50.574	139.361	0	0	35.8719	0	74.3318	8.96797	-3.05113	0.01612	0.153741	101105204	annot_exons
Circ_002590	19.581	90.9732	25.287	167.233	0	0	0	0	75.7686	0.001	-16.2093	0.00235803	0.0355329	101105204	exon_intron
Circ_002607	78.3239	45.4866	126.435	0	0	0	0	0	62.5614	0.001	-15.933	0.00599198	0.0743849	101105870	annot_exons
Circ_002612	195.81	363.893	126.435	334.467	27.7635	92.2959	71.7437	114.384	255.151	76.5469	-1.73694	0.00513248	0.0660405	101108362	annot_exons
Circ_002613	372.038	295.663	177.009	0	0	26.3703	0	12.7094	211.178	9.76991	-4.43397	0.000397201	0.00861206	101108362	annot_exons
Circ_002618	0	0	0	0	41.6453	92.2959	59.7864	0	0.001	48.4319	15.5637	0.0146193	0.14305	NA	intergenic
Circ_002626	58.7429	68.2299	0	55.7445	0	0	0	0	45.6793	0.001	-15.4793	0.0191378	0.174678	101108443	intronic
Circ_002638	430.781	2706.45	1213.78	2536.37	41.6453	290.073	0	101.675	1721.85	108.348	-3.99021	3.36008e-05	0.00120236	101111770	annot_exons
Circ_002639	0	500.353	0	278.722	0	0	0	0	194.769	0.001	-17.5714	0.00124443	0.0214856	101111770	annot_exons
Circ_002641	97.9048	68.2299	101.148	0	0	0	0	0	66.8207	0.001	-16.028	0.00342674	0.0480595	101111770	annot_exons
Circ_002645	58.7429	22.7433	202.296	27.8722	0	13.1851	11.9573	0	77.9136	6.28561	-3.63175	0.00718015	0.0848973	101111770	annot_exons
Circ_002649	0	0	0	0	55.527	13.1851	35.8719	50.8375	0.001	38.8554	15.2458	0.0176775	0.164854	101111147	annot_exons
Circ_002654	78.3239	90.9732	278.157	55.7445	0	0	23.9146	0	125.8	5.97864	-4.39517	0.00025003	0.00598571	101112535	annot_exons
Circ_002660	97.9048	22.7433	101.148	55.7445	0	0	0	0	69.3852	0.001	-16.0823	0.001298	0.0222547	101113301	annot_exons
Circ_002662	137.067	90.9732	126.435	111.489	41.6453	0	11.9573	0	116.491	13.4006	-3.11984	0.000231583	0.00564371	101113301	annot_exons
Circ_002664	39.1619	22.7433	151.722	0	0	0	0	0	53.4068	0.001	-15.7047	0.0190107	0.17397	101113301	annot_exons
Circ_002673	39.1619	90.9732	50.574	139.361	27.7635	13.1851	0	0	80.0176	10.2372	-2.9665	0.00788339	0.0910383	101113555	annot_exons
Circ_002687	0	0	0	0	0	158.222	95.6583	139.803	0.001	98.4208	16.5867	0.000472383	0.0099258	101114919	annot_exons
Circ_002690	352.457	113.716	75.861	222.978	0	0	0	0	191.253	0.001	-17.5451	7.89435e-07	4.75837e-05	101114583	annot_exons
Circ_002692	97.9048	113.716	101.148	0	0	13.1851	0	0	78.1923	3.29628	-4.56812	0.0013409	0.0228228	101114583	annot_exons
Circ_002693	78.3239	113.716	126.435	55.7445	0	26.3703	0	0	93.555	6.59257	-3.8269	0.000496819	0.01035	101114583	annot_exons
Circ_002694	58.7429	250.176	50.574	0	0	0	11.9573	0	89.8733	2.98932	-4.91	0.00181895	0.0291247	101114583	annot_exons
Circ_002696	548.267	1046.19	657.462	808.295	305.399	329.628	346.761	177.931	765.054	289.93	-1.39986	0.000392507	0.00855153	101114583	annot_exons
Circ_002697	117.486	159.203	50.574	222.978	0	79.1108	71.7437	12.7094	137.56	40.891	-1.75021	0.0394096	0.287197	101114583	annot_exons
Circ_002701	0	0	0	0	97.1723	224.147	107.616	343.153	0.001	193.022	17.5584	2.43368e-06	0.000127435	101117384	annot_exons
Circ_002702	352.457	90.9732	303.444	139.361	13.8818	65.9257	95.6583	76.2563	221.559	62.9305	-1.81586	0.0102178	0.110373	101117384	annot_exons
Circ_002705	58.7429	204.69	202.296	222.978	41.6453	26.3703	0	25.4188	172.177	23.3586	-2.88187	0.000510464	0.0105774	101115599	intronic
Circ_002706	97.9048	181.946	404.592	390.211	13.8818	13.1851	35.8719	25.4188	268.664	22.0894	-3.60438	5.82546e-06	0.000271494	101115599	antisense
Circ_002707	0	0	0	0	83.2905	145.036	0	0	0.001	57.0817	15.8007	0.0261766	0.216997	101118406	annot_exons
Circ_002727	0	0	25.287	0	69.4088	79.1108	23.9146	114.384	6.32175	71.7047	3.50367	0.0091275	0.101465	101119603	annot_exons
Circ_002731	156.648	0	101.148	0	0	0	0	0	64.4489	0.001	-15.9759	0.0183769	0.169568	101119603	annot_exons
Circ_002732	78.3239	68.2299	101.148	27.8722	0	0	0	0	68.8935	0.001	-16.0721	0.000946317	0.0173784	101119603	annot_exons
Circ_002738	97.9048	0	25.287	0	194.345	263.703	239.146	177.931	30.798	218.781	2.82858	0.000321082	0.00729593	101121391	annot_exons
Circ_002750	156.648	227.433	75.861	222.978	83.2905	52.7405	11.9573	0	170.73	36.9971	-2.20623	0.00559514	0.0705216	101121651	annot_exons
Circ_002752	58.7429	0	101.148	278.722	0	0	0	0	109.653	0.001	-16.7426	0.000929461	0.0171152	101121651	intronic
Circ_002758	97.9048	159.203	0	0	0	0	0	0	64.277	0.001	-15.972	0.0175682	0.164091	101117901	annot_exons
Circ_002774	97.9048	204.69	50.574	0	41.6453	0	23.9146	0	88.2921	16.39	-2.42947	0.0348352	0.263231	101117901	annot_exons
Circ_002779	0	45.4866	101.148	55.7445	13.8818	13.1851	0	0	50.5948	6.76672	-2.90246	0.0480898	0.322755	101117901	annot_exons
Circ_002783	39.1619	0	0	83.6167	388.689	922.959	406.548	177.931	30.6947	474.032	3.94892	1.40596e-05	0.000568336	101123084	annot_exons
Circ_002785	0	0	0	0	0	158.222	35.8719	88.9657	0.001	70.7648	16.1107	0.00319261	0.0452538	101123084	exon_intron
Circ_002798	19.581	0	0	0	138.818	0	35.8719	165.222	4.89524	84.9779	4.11764	0.00754293	0.0880733	101105125	annot_exons
Circ_002804	0	0	0	0	152.699	263.703	298.932	203.35	0.001	229.671	17.8092	4.68317e-09	5.22742e-07	101106734	annot_exons
Circ_002823	0	0	0	0	41.6453	65.9257	59.7864	38.1282	0.001	51.3714	15.6487	0.00294207	0.0424924	101110640	annot_exons
Circ_002824	117.486	45.4866	50.574	55.7445	0	0	0	0	67.3227	0.001	-16.0388	0.000995394	0.0180179	NA	intergenic
Circ_002835	78.3239	250.176	126.435	111.489	55.527	26.3703	83.701	25.4188	141.606	47.7543	-1.56818	0.0278649	0.226561	101107497	annot_exons
Circ_002837	0	0	0	0	97.1723	13.1851	11.9573	25.4188	0.001	36.9334	15.1726	0.0350619	0.264539	101113718	annot_exons
Circ_002838	0	0	0	0	41.6453	0	23.9146	63.5469	0.001	32.2767	14.9782	0.0474246	0.319986	101108280	annot_exons
Circ_002871	430.781	432.123	404.592	445.956	957.841	1002.07	633.736	1042.17	428.363	908.954	1.08537	0.000293441	0.00680863	101115929	annot_exons
Circ_002876	0	0	0	0	13.8818	26.3703	11.9573	76.2563	0.001	32.1164	14.971	0.0430436	0.303093	101115929	annot_exons
Circ_002881	58.7429	90.9732	151.722	111.489	0	0	11.9573	0	103.232	2.98932	-5.10992	2.83558e-05	0.001031	NA	intergenic
Circ_002886	0	45.4866	0	27.8722	111.054	65.9257	119.573	139.803	18.3397	109.089	2.57246	0.00468581	0.0615189	101109588	exon_intron
Circ_002893	0	0	0	0	97.1723	79.1108	35.8719	101.675	0.001	78.4575	16.2596	0.000124591	0.00349834	NA	intergenic
Circ_002895	19.581	250.176	126.435	139.361	0	0	0	0	133.888	0.001	-17.0307	4.81896e-05	0.00163591	101116444	annot_exons
Circ_002896	117.486	250.176	126.435	111.489	0	13.1851	23.9146	0	151.397	9.27493	-4.02885	5.88071e-06	0.000273131	101116444	annot_exons
Circ_002911	489.524	181.946	354.018	167.233	13.8818	52.7405	0	12.7094	298.181	19.8329	-3.91022	1.59627e-06	8.94573e-05	101117130	annot_exons
Circ_002916	0	22.7433	202.296	0	0	0	0	0	56.2598	0.001	-15.7798	0.0445713	0.309195	101117130	annot_exons
Circ_002930	156.648	250.176	151.722	0	41.6453	26.3703	0	38.1282	139.637	26.5359	-2.39566	0.0214747	0.188863	101111156	exon_intron
Circ_002940	156.648	0	75.861	139.361	27.7635	0	0	0	92.9675	6.94088	-3.74354	0.0043633	0.0579296	101118494	one_exon
Circ_002967	156.648	68.2299	202.296	55.7445	0	13.1851	0	12.7094	120.73	6.47363	-4.22106	0.000102018	0.00294063	100885769	annot_exons
Circ_002981	0	0	0	55.7445	166.581	92.2959	143.487	101.675	13.9361	126.01	3.17664	0.000903042	0.0167789	101114748	exon_intron
Circ_002999	293.715	0	0	55.7445	0	0	0	12.7094	87.3647	3.17735	-4.78116	0.0259071	0.215594	101115254	annot_exons
Circ_003001	3622.48	1501.06	3894.2	2201.91	555.27	316.443	609.822	699.016	2804.91	545.138	-2.36326	3.65495e-07	2.45388e-05	101115254	annot_exons
Circ_003003	254.553	45.4866	101.148	0	13.8818	0	0	25.4188	100.297	9.82513	-3.35165	0.0114109	0.120151	101115254	annot_exons
Circ_003004	1468.57	864.245	1289.64	696.806	180.463	131.851	119.573	127.094	1079.82	139.745	-2.94991	3.26737e-11	5.98811e-09	101115254	annot_exons
Circ_003017	469.943	796.015	404.592	557.445	263.753	171.407	430.462	228.769	556.999	273.598	-1.02562	0.0222294	0.193354	101115756	annot_exons
Circ_003021	176.229	204.69	101.148	111.489	27.7635	0	0	12.7094	148.389	10.1182	-3.87435	2.02895e-05	0.000777307	101115756	annot_exons
Circ_003039	0	0	0	0	13.8818	105.481	35.8719	12.7094	0.001	41.986	15.3576	0.0234077	0.199852	101105168	exon_intron
Circ_003040	0	45.4866	25.287	0	180.463	145.036	131.53	190.641	17.6934	161.918	3.19398	8.66025e-05	0.00258133	101105168	exon_intron
Circ_003050	0	22.7433	75.861	111.489	777.378	145.036	430.462	279.607	52.5233	408.121	2.95797	0.000499307	0.0103859	101105168	annot_exons
Circ_003064	78.3239	272.92	0	0	0	0	0	0	87.8109	0.001	-16.4221	0.00642061	0.0784471	101105168	annot_exons
Circ_003074	352.457	136.46	455.166	529.572	999.486	540.59	789.181	1042.17	368.414	842.857	1.19396	0.0131145	0.132465	101106441	annot_exons
Circ_003078	19.581	22.7433	126.435	0	0	0	0	0	42.1898	0.001	-15.3646	0.048069	0.322755	101123132	annot_exons
Circ_003079	58.7429	45.4866	0	83.6167	0	0	0	0	46.9615	0.001	-15.5192	0.0204864	0.183451	101123132	annot_exons
Circ_003083	195.81	113.716	328.731	55.7445	0	0	11.9573	0	173.5	2.98932	-5.85898	2.27723e-06	0.00012044	101123132	annot_exons
Circ_003092	137.067	113.716	101.148	0	0	0	0	12.7094	87.9828	3.17735	-4.79133	0.000575441	0.0116654	101123387	annot_exons
Circ_003093	176.229	22.7433	75.861	250.85	55.527	13.1851	23.9146	0	131.421	23.1567	-2.50469	0.0129851	0.131667	101123387	annot_exons
Circ_003097	626.591	341.149	480.453	557.445	222.108	276.888	310.89	190.641	501.41	250.132	-1.0033	0.00835543	0.0950241	101123387	annot_exons
Circ_003103	39.1619	113.716	50.574	27.8722	0	0	23.9146	0	57.8312	5.97864	-3.27396	0.0163842	0.155658	101123387	annot_exons
Circ_003117	234.972	204.69	581.601	362.339	83.2905	79.1108	47.8292	76.2563	345.9	71.6217	-2.27189	7.74931e-05	0.00235906	101108320	annot_exons
Circ_003140	0	0	0	0	444.216	131.851	0	127.094	0.001	175.79	17.4235	0.000154396	0.00413817	101102318	one_exon
Circ_003159	332.876	22.7433	429.879	139.361	0	13.1851	11.9573	12.7094	231.215	9.46295	-4.6108	6.17795e-05	0.00199015	101111642	annot_exons
Circ_003170	195.81	113.716	25.287	0	27.7635	13.1851	0	25.4188	83.7033	16.5919	-2.33481	0.0378906	0.279051	101103330	annot_exons
Circ_003179	352.457	318.406	151.722	195.106	13.8818	92.2959	0	12.7094	254.423	29.7218	-3.09764	9.11412e-05	0.00269293	101111891	annot_exons
Circ_003196	78.3239	181.946	50.574	55.7445	0	0	0	0	91.6472	0.001	-16.4838	0.000162649	0.00428803	100174988	exon_intron
Circ_003197	685.334	568.582	531.027	668.934	27.7635	26.3703	47.8292	127.094	613.469	57.2642	-3.42129	3.09315e-11	5.74649e-09	100174988	exon_intron
Circ_003199	0	0	0	0	83.2905	105.481	95.6583	76.2563	0.001	90.1716	16.4604	0.00020196	0.00509106	100144755	annot_exons
Circ_003212	0	0	0	0	83.2905	105.481	47.8292	12.7094	0.001	62.3275	15.9276	0.00200948	0.0314527	101115803	annot_exons
Circ_003213	58.7429	0	0	0	111.054	461.48	95.6583	139.803	14.6857	201.999	3.78186	0.000755712	0.014517	101115803	annot_exons
Circ_003215	0	0	0	0	27.7635	79.1108	59.7864	0	0.001	41.6652	15.3466	0.0236864	0.201527	101115803	annot_exons
Circ_003219	19.581	0	25.287	83.6167	347.044	527.405	203.274	203.35	32.1212	320.268	3.31768	1.72655e-05	0.000674798	101115803	annot_exons
Circ_003222	19.581	0	151.722	83.6167	416.453	408.739	346.761	368.572	63.7299	385.131	2.59531	0.000129065	0.00360531	101115803	annot_exons
Circ_003226	19.581	68.2299	25.287	222.978	0	13.1851	0	0	84.0189	3.29628	-4.6718	0.0016576	0.0269549	101116064	annot_exons
Circ_003239	137.067	227.433	126.435	111.489	27.7635	26.3703	0	0	150.606	13.5334	-3.47618	1.95942e-05	0.000752794	NA	intergenic
Circ_003255	0	0	0	0	69.4088	39.5554	47.8292	0	0.001	39.1983	15.2585	0.0288185	0.231265	101106601	annot_exons
Circ_003266	78.3239	432.123	25.287	27.8722	0	0	23.9146	0	140.901	5.97864	-4.55872	0.00170143	0.0276015	101121103	annot_exons
Circ_003273	0	0	0	0	97.1723	118.666	83.701	139.803	0.001	109.836	16.745	3.12481e-05	0.00112709	NA	intergenic
Circ_003288	391.619	500.353	328.731	306.595	180.463	105.481	83.701	203.35	381.824	143.249	-1.41439	0.00197713	0.0311257	101123051	annot_exons
Circ_003299	39.1619	22.7433	50.574	83.6167	0	0	0	0	49.024	0.001	-15.5812	0.0102967	0.11096	101102401	one_exon
Circ_003317	58.7429	22.7433	0	0	277.635	606.516	884.839	851.529	20.3715	655.13	5.00715	1.77656e-09	2.20034e-07	101105579	annot_exons
Circ_003320	0	0	0	0	69.4088	52.7405	35.8719	12.7094	0.001	42.6826	15.3814	0.012681	0.129406	101105579	annot_exons
Circ_003321	0	0	0	0	194.345	158.222	95.6583	88.9657	0.001	134.298	17.0351	8.36894e-06	0.000367908	101105579	annot_exons
Circ_003327	293.715	90.9732	25.287	0	0	0	11.9573	0	102.494	2.98932	-5.09957	0.00163983	0.0267139	101106340	annot_exons
Circ_003334	0	0	0	0	55.527	92.2959	35.8719	101.675	0.001	71.3425	16.1225	0.000343486	0.00767948	101107611	annot_exons
Circ_003338	0	0	0	0	333.162	369.184	155.445	343.153	0.001	300.236	18.1957	4.43375e-10	6.13576e-08	101107611	annot_exons
Circ_003340	19.581	113.716	25.287	83.6167	985.605	817.478	131.53	1626.8	60.5503	890.354	3.87817	1.16044e-05	0.000482018	101107611	annot_exons
Circ_003349	0	0	0	0	27.7635	52.7405	119.573	76.2563	0.001	69.0833	16.076	0.000755659	0.014517	101107611	annot_exons
Circ_003350	0	0	0	0	69.4088	39.5554	119.573	0	0.001	57.1343	15.8021	0.00848733	0.0960304	101107611	exon_intron
Circ_003355	0	0	0	0	69.4088	79.1108	83.701	25.4188	0.001	64.4098	15.975	0.000915086	0.016931	101107611	exon_intron
Circ_003356	0	0	0	0	124.936	263.703	35.8719	25.4188	0.001	112.482	16.7793	0.000280571	0.00656618	101107611	annot_exons
Circ_003364	176.229	68.2299	50.574	195.106	13.8818	13.1851	47.8292	63.5469	122.535	34.6107	-1.8239	0.0231797	0.198775	101107611	annot_exons
Circ_003375	0	0	0	0	69.4088	26.3703	47.8292	12.7094	0.001	39.0794	15.2541	0.0207523	0.184916	101107611	annot_exons
Circ_003383	39.1619	45.4866	25.287	55.7445	0	0	0	0	41.42	0.001	-15.338	0.0133534	0.134031	101107611	annot_exons
Circ_003389	156.648	45.4866	303.444	222.978	0	0	11.9573	12.7094	182.139	6.16667	-4.88441	9.92804e-06	0.000423967	101107611	annot_exons
Circ_003390	391.619	409.379	429.879	334.467	124.936	224.147	215.231	177.931	391.336	185.561	-1.07651	0.00395775	0.053829	101107611	annot_exons
Circ_003397	19.581	113.716	101.148	0	0	13.1851	0	0	58.6114	3.29628	-4.15227	0.0391593	0.285967	101108926	annot_exons
Circ_003403	117.486	159.203	25.287	0	13.8818	0	0	25.4188	75.494	9.82513	-2.94181	0.0287504	0.231059	101108926	annot_exons
Circ_003416	0	0	0	0	13.8818	13.1851	47.8292	50.8375	0.001	31.4334	14.94	0.0496161	0.32994	101110521	antisense
Circ_003438	293.715	545.839	252.87	27.8722	55.527	39.5554	131.53	88.9657	280.074	78.8946	-1.82781	0.0228093	0.196547	101111560	annot_exons
Circ_003446	0	0	0	0	0	65.9257	23.9146	63.5469	0.001	38.3468	15.2268	0.0333721	0.25522	101111031	annot_exons
Circ_003460	97.9048	22.7433	0	27.8722	55.527	263.703	71.7437	165.222	37.1301	139.049	1.90493	0.0434782	0.305361	101112580	annot_exons
Circ_003462	0	0	0	0	194.345	210.962	83.701	266.897	0.001	188.976	17.5278	5.63998e-07	3.61302e-05	101112580	annot_exons
Circ_003477	19.581	22.7433	0	0	55.527	105.481	143.487	88.9657	10.5811	98.3653	3.21666	0.00202821	0.0317079	101113862	annot_exons
Circ_003478	195.81	22.7433	0	0	0	0	0	0	54.6382	0.001	-15.7376	0.038563	0.282851	101113862	annot_exons
Circ_003486	39.1619	22.7433	75.861	111.489	0	0	11.9573	0	62.3138	2.98932	-4.38166	0.00321401	0.0455232	101113862	exon_intron
Circ_003489	78.3239	90.9732	25.287	222.978	41.6453	13.1851	0	12.7094	104.39	16.8849	-2.62818	0.00728663	0.0858269	101113862	annot_exons
Circ_003494	0	0	0	0	55.527	92.2959	35.8719	12.7094	0.001	49.1011	15.5835	0.00675936	0.0813763	101112331	annot_exons
Circ_003496	0	0	0	0	0	13.1851	83.701	139.803	0.001	59.1724	15.8526	0.0115857	0.12161	101112331	annot_exons
Circ_003508	117.486	0	75.861	139.361	0	0	11.9573	0	83.177	2.98932	-4.79829	0.00126362	0.0217615	NA	intergenic
Circ_003511	39.1619	22.7433	75.861	27.8722	0	0	0	0	41.4096	0.001	-15.3377	0.0169786	0.159953	101115551	annot_exons
Circ_003513	39.1619	113.716	75.861	139.361	0	26.3703	11.9573	12.7094	92.0252	12.7592	-2.85049	0.00222479	0.034074	101115551	annot_exons
Circ_003523	0	0	0	0	41.6453	39.5554	11.9573	38.1282	0.001	32.8215	15.0024	0.0270807	0.221716	101115135	annot_exons
Circ_003526	39.1619	90.9732	101.148	250.85	13.8818	0	0	0	120.533	3.47044	-5.11817	4.93589e-05	0.00166519	NA	intergenic
Circ_003542	39.1619	68.2299	126.435	55.7445	0	0	0	0	72.3928	0.001	-16.1436	0.00100187	0.0181044	101116664	annot_exons
Circ_003546	39.1619	113.716	75.861	83.6167	0	0	23.9146	0	78.089	5.97864	-3.70723	0.00203983	0.0318712	101116584	annot_exons
Circ_003550	39.1619	0	50.574	83.6167	0	0	0	0	43.3382	0.001	-15.4034	0.0312982	0.243736	101117089	annot_exons
Circ_003552	979.048	705.042	606.888	780.423	208.226	263.703	334.804	355.863	767.85	290.649	-1.40155	3.72067e-05	0.00131406	101117089	annot_exons
Circ_003559	176.229	0	25.287	0	0	0	0	0	50.3789	0.001	-15.6205	0.0476975	0.321109	101118197	annot_exons
Circ_003563	0	0	0	0	69.4088	26.3703	0	63.5469	0.001	39.8315	15.2816	0.0322372	0.248924	101118197	annot_exons
Circ_003573	0	90.9732	126.435	0	0	0	0	0	54.3521	0.001	-15.73	0.0324509	0.250182	101118795	annot_exons
Circ_003582	0	0	0	0	41.6453	92.2959	155.445	12.7094	0.001	75.5238	16.2046	0.00103866	0.0186449	101119830	annot_exons
Circ_003588	176.229	136.46	227.583	83.6167	13.8818	105.481	11.9573	25.4188	155.972	39.1847	-1.99292	0.00882767	0.0987796	101119996	exon_intron
Circ_003591	39.1619	45.4866	151.722	250.85	0	79.1108	0	38.1282	121.805	29.3097	-2.05512	0.0451289	0.310933	101119996	annot_exons
Circ_003598	58.7429	90.9732	0	139.361	0	0	0	0	72.2693	0.001	-16.1411	0.00314852	0.0448724	101120339	annot_exons
Circ_003607	215.391	90.9732	75.861	55.7445	0	52.7405	0	0	109.492	13.1851	-3.05385	0.00561199	0.0706684	101120339	annot_exons
Circ_003618	0	22.7433	25.287	0	41.6453	39.5554	71.7437	139.803	12.0076	73.1869	2.60764	0.0224908	0.19476	101121866	annot_exons
Circ_003622	0	22.7433	252.87	334.467	0	26.3703	0	0	152.52	6.59257	-4.53201	0.00346623	0.0484379	101122118	annot_exons
Circ_003632	0	0	0	0	97.1723	118.666	83.701	12.7094	0.001	78.0622	16.2523	0.000524623	0.010813	101123311	annot_exons
Circ_003646	19.581	0	0	55.7445	111.054	92.2959	107.616	177.931	18.8314	122.224	2.69832	0.00225635	0.0344006	NA	intergenic
Circ_003652	117.486	204.69	25.287	222.978	13.8818	0	0	76.2563	142.61	22.5345	-2.66187	0.0126527	0.129214	100169937	exon_intron
Circ_003659	0	22.7433	0	0	277.635	131.851	215.231	266.897	5.68582	222.904	5.29291	8.8895e-08	7.26262e-06	101102993	annot_exons
Circ_003676	78.3239	45.4866	75.861	83.6167	27.7635	0	11.9573	0	70.822	9.9302	-2.8343	0.0111698	0.118164	101102993	annot_exons
Circ_003677	0	0	0	0	41.6453	39.5554	23.9146	38.1282	0.001	35.8109	15.1281	0.0214791	0.188863	NA	intergenic
Circ_003681	0	68.2299	75.861	27.8722	0	0	0	0	42.9908	0.001	-15.3917	0.0345579	0.262252	101103654	annot_exons
Circ_003686	156.648	136.46	101.148	362.339	83.2905	52.7405	0	12.7094	189.149	37.1851	-2.34672	0.00462758	0.0610172	101103904	annot_exons
Circ_003687	0	0	0	0	638.561	250.518	203.274	254.188	0.001	336.635	18.3608	5.23589e-09	5.76751e-07	NA	intergenic
Circ_003698	19.581	113.716	101.148	0	0	0	0	25.4188	58.6114	6.35469	-3.20529	0.0423217	0.299957	101104583	annot_exons
Circ_003714	0	0	0	0	471.98	290.073	251.103	457.538	0.001	367.673	18.4881	4.78756e-12	1.07233e-09	101106341	exon_intron
Circ_003717	19.581	0	0	0	83.2905	237.332	83.701	101.675	4.89524	126.5	4.69161	0.000203176	0.00511135	101106341	one_exon
Circ_003718	0	0	0	0	27.7635	65.9257	23.9146	88.9657	0.001	51.6424	15.6563	0.00521152	0.066804	101106341	annot_exons
Circ_003719	0	0	0	0	27.7635	52.7405	47.8292	38.1282	0.001	41.6153	15.3448	0.008482	0.0960207	101106341	exon_intron
Circ_003720	0	0	0	55.7445	166.581	92.2959	35.8719	76.2563	13.9361	92.7513	2.73454	0.0195503	0.177174	101106341	annot_exons
Circ_003721	0	0	0	0	41.6453	13.1851	59.7864	50.8375	0.001	41.3636	15.3361	0.0116456	0.121959	101106341	exon_intron
Circ_003722	0	0	0	0	13.8818	105.481	35.8719	12.7094	0.001	41.986	15.3576	0.0234101	0.199852	101106341	exon_intron
Circ_003740	156.648	68.2299	0	83.6167	0	0	0	0	77.1236	0.001	-16.2349	0.00225169	0.0343697	101106534	annot_exons
Circ_003761	0	0	0	0	55.527	52.7405	71.7437	50.8375	0.001	57.7122	15.8166	0.000969865	0.0176673	NA	intergenic
Circ_003784	0	0	0	0	97.1723	13.1851	11.9573	101.675	0.001	55.9975	15.7731	0.00856172	0.0965606	101111202	one_exon
Circ_003812	78.3239	45.4866	101.148	55.7445	0	0	23.9146	0	70.1757	5.97864	-3.55308	0.00429567	0.0572278	101112235	annot_exons
Circ_003821	117.486	136.46	0	55.7445	0	0	11.9573	0	77.4225	2.98932	-4.69486	0.00188857	0.030115	101112990	annot_exons
Circ_003825	78.3239	45.4866	75.861	139.361	41.6453	0	23.9146	0	84.7582	16.39	-2.37054	0.0133784	0.13415	101112990	annot_exons
Circ_003827	0	68.2299	25.287	55.7445	0	0	0	0	37.3153	0.001	-15.1875	0.0489135	0.325956	101113249	annot_exons
Circ_003829	39.1619	341.149	252.87	139.361	111.054	13.1851	0	76.2563	193.136	50.1239	-1.94604	0.0383569	0.281568	NA	intergenic
Circ_003838	0	0	0	0	111.054	79.1108	143.487	88.9657	0.001	105.655	16.689	5.35922e-05	0.00176841	NA	intergenic
Circ_003839	97.9048	0	25.287	55.7445	0	0	0	0	44.7341	0.001	-15.4491	0.0262934	0.2175	106990123	one_exon
Circ_003841	39.1619	0	50.574	83.6167	0	0	0	0	43.3382	0.001	-15.4034	0.0312973	0.243736	106990123	annot_exons
Circ_003842	19.581	22.7433	151.722	55.7445	0	13.1851	0	0	62.4477	3.29628	-4.24374	0.0257048	0.214265	106990123	annot_exons
Circ_003862	0	0	0	0	124.936	26.3703	35.8719	25.4188	0.001	53.1492	15.6978	0.00769368	0.0894101	101115289	annot_exons
Circ_003867	97.9048	272.92	556.314	250.85	13.8818	39.5554	47.8292	0	294.497	25.3166	-3.5401	2.44555e-05	0.000912421	101115289	annot_exons
Circ_003869	0	0	0	0	41.6453	26.3703	11.9573	38.1282	0.001	29.5252	14.8497	0.0425973	0.301081	101115289	annot_exons
Circ_003875	0	0	0	0	27.7635	52.7405	59.7864	25.4188	0.001	41.4273	15.3383	0.00999804	0.108812	NA	intergenic
Circ_003929	0	0	0	0	55.527	65.9257	11.9573	25.4188	0.001	39.7072	15.2771	0.0212458	0.188127	101118709	annot_exons
Circ_003948	39.1619	0	25.287	27.8722	138.818	197.777	167.402	305.025	23.0803	202.255	3.13145	8.47367e-05	0.00253967	101121021	one_exon
Circ_003951	0	0	0	0	55.527	52.7405	35.8719	190.641	0.001	83.6951	16.3529	0.000399383	0.00865245	101105087	annot_exons
Circ_003953	19.581	0	75.861	27.8722	2470.95	1885.47	2367.54	2160.6	30.8286	2221.14	6.17089	5.16878e-34	1.55776e-30	101105087	annot_exons
Circ_003955	430.781	477.609	455.166	250.85	1277.12	1186.66	1112.03	1004.04	403.602	1144.96	1.5043	4.6235e-07	3.03076e-05	101105087	annot_exons
Circ_003968	19.581	113.716	25.287	0	0	0	0	0	39.6461	0.001	-15.2749	0.0454268	0.311748	101102402	intronic
Circ_003981	0	45.4866	0	0	55.527	131.851	47.8292	101.675	11.3716	84.2206	2.88873	0.00992163	0.108339	101106090	annot_exons
Circ_003985	19.581	0	0	0	27.7635	39.5554	95.6583	50.8375	4.89524	53.4537	3.44884	0.0133199	0.133941	101106345	annot_exons
Circ_003987	0	22.7433	0	0	13.8818	79.1108	83.701	38.1282	5.68582	53.7054	3.23963	0.0463181	0.315424	101106345	annot_exons
Circ_003989	19.581	0	0	0	83.2905	26.3703	0	101.675	4.89524	52.834	3.43201	0.044136	0.307591	101106345	annot_exons
Circ_003997	215.391	68.2299	202.296	195.106	596.915	316.443	298.932	406.7	170.256	404.748	1.24932	0.0134214	0.134482	101106605	annot_exons
Circ_003998	0	136.46	0	55.7445	111.054	237.332	215.231	101.675	48.0511	166.323	1.79135	0.0445165	0.309169	101106605	annot_exons
Circ_004004	19.581	0	25.287	0	111.054	92.2959	83.701	63.5469	11.217	87.6495	2.96606	0.00295576	0.0425542	101106605	annot_exons
Circ_004010	39.1619	113.716	75.861	83.6167	374.807	224.147	119.573	279.607	78.089	249.534	1.67604	0.00663626	0.0803842	101106605	annot_exons
Circ_004034	332.876	727.785	227.583	250.85	27.7635	79.1108	47.8292	88.9657	384.774	60.9173	-2.65909	3.98e-05	0.00139115	NA	intergenic
Circ_004035	215.391	250.176	50.574	111.489	0	39.5554	11.9573	38.1282	156.907	22.4102	-2.80769	0.00166196	0.026994	NA	intergenic
Circ_004044	195.81	204.69	75.861	55.7445	0	26.3703	0	0	133.026	6.59257	-4.33473	7.52075e-05	0.00230761	101107616	annot_exons
Circ_004055	97.9048	113.716	0	0	0	0	0	0	52.9053	0.001	-15.6911	0.027911	0.226732	101107879	annot_exons
Circ_004056	881.144	545.839	834.471	668.934	55.527	158.222	47.8292	343.153	732.597	151.183	-2.27673	0.000327459	0.00740166	101107879	annot_exons
Circ_004057	195.81	45.4866	0	111.489	0	0	23.9146	0	88.1963	5.97864	-3.88283	0.00698902	0.0832951	101107879	annot_exons
Circ_004058	137.067	136.46	101.148	111.489	69.4088	26.3703	23.9146	50.8375	121.541	42.6328	-1.51141	0.0209673	0.186343	101107879	annot_exons
Circ_004076	156.648	113.716	101.148	0	0	13.1851	0	12.7094	92.8781	6.47363	-3.84269	0.00230088	0.0348653	101108670	annot_exons
Circ_004078	234.972	0	50.574	0	13.8818	0	0	12.7094	71.3864	6.64779	-3.4247	0.0368461	0.273887	101108670	annot_exons
Circ_004099	19.581	22.7433	126.435	0	0	0	0	0	42.1898	0.001	-15.3646	0.0480607	0.322755	101108932	exon_intron
Circ_004100	58.7429	136.46	101.148	278.722	41.6453	26.3703	11.9573	12.7094	143.768	23.1706	-2.63338	0.00282402	0.0411158	101108927	annot_exons
Circ_004106	39.1619	0	101.148	55.7445	0	0	0	0	49.0136	0.001	-15.5809	0.0178252	0.165692	101108927	annot_exons
Circ_004151	58.7429	45.4866	25.287	27.8722	402.571	224.147	167.402	114.384	39.3472	227.126	2.52916	0.00054878	0.011251	101110252	annot_exons
Circ_004182	0	0	0	0	41.6453	26.3703	59.7864	63.5469	0.001	47.8372	15.5458	0.00548506	0.0695408	101113866	annot_exons
Circ_004183	19.581	159.203	25.287	0	999.486	659.257	1076.16	749.854	51.0178	871.188	4.09391	2.33378e-08	2.16046e-06	101113866	annot_exons
Circ_004188	0	0	0	0	222.108	303.258	394.591	177.931	0.001	274.472	18.0663	1.13333e-09	1.45657e-07	101113866	one_exon
Circ_004191	0	0	0	0	97.1723	52.7405	0	190.641	0.001	85.1384	16.3775	0.00145949	0.0244366	101118966	annot_exons
Circ_004192	0	0	25.287	0	55.527	197.777	95.6583	88.9657	6.32175	109.482	4.11423	0.00060335	0.0121224	101118966	annot_exons
Circ_004200	78.3239	22.7433	0	111.489	0	0	0	0	53.139	0.001	-15.6975	0.0152715	0.147463	101115139	annot_exons
Circ_004203	78.3239	113.716	50.574	0	0	0	0	12.7094	60.6536	3.17735	-4.2547	0.00640698	0.0783159	101115139	annot_exons
Circ_004207	19.581	90.9732	50.574	55.7445	13.8818	0	11.9573	0	54.2182	6.45976	-3.06922	0.0184735	0.170176	101115139	annot_exons
Circ_004217	78.3239	45.4866	101.148	83.6167	41.6453	13.1851	0	25.4188	77.1438	20.0623	-1.94306	0.0285313	0.230049	101115887	annot_exons
Circ_004229	0	0	0	0	13.8818	13.1851	107.616	76.2563	0.001	52.7347	15.6865	0.0103926	0.111782	101122957	annot_exons
Circ_004242	78.3239	0	151.722	27.8722	13.8818	0	0	0	64.4795	3.47044	-4.21565	0.0298462	0.236158	101117432	annot_exons
Circ_004249	313.295	227.433	328.731	195.106	0	26.3703	35.8719	38.1282	266.141	25.0926	-3.40686	1.79667e-07	1.3628e-05	101117432	annot_exons
Circ_004277	0	0	25.287	27.8722	249.872	355.999	239.146	127.094	13.2898	243.027	4.19273	1.4088e-06	7.99421e-05	NA	intergenic
Circ_004278	0	0	25.287	27.8722	347.044	369.184	298.932	203.35	13.2898	304.627	4.51865	2.00947e-08	1.87302e-06	NA	intergenic
Circ_004279	0	0	0	0	13.8818	145.036	83.701	25.4188	0.001	67.0095	16.0321	0.00251413	0.0374071	NA	intergenic
Circ_004304	78.3239	0	75.861	250.85	0	0	0	0	101.259	0.001	-16.6277	0.00107052	0.0190404	101122802	annot_exons
Circ_004313	0	0	0	0	27.7635	13.1851	47.8292	50.8375	0.001	34.9038	15.0911	0.0274892	0.224246	101113605	annot_exons
Circ_004346	0	0	0	0	41.6453	13.1851	71.7437	25.4188	0.001	37.9982	15.2136	0.0212513	0.188127	101122289	exon_intron
Circ_004347	0	0	0	0	624.679	276.888	777.224	1588.67	0.001	816.866	19.6397	1.58303e-11	3.15722e-09	101122289	exon_intron
Circ_004364	0	0	0	0	69.4088	92.2959	83.701	190.641	0.001	109.012	16.7341	0.000100894	0.0029202	101103164	annot_exons
Circ_004373	0	0	0	0	27.7635	0	95.6583	25.4188	0.001	37.2101	15.1834	0.0411988	0.29516	101104412	annot_exons
Circ_004392	58.7429	22.7433	101.148	83.6167	0	26.3703	23.9146	12.7094	66.5627	15.7486	-2.07949	0.0451476	0.310933	101114539	annot_exons
Circ_004394	176.229	45.4866	25.287	55.7445	208.226	158.222	286.975	406.7	75.6867	265.031	1.80805	0.00809843	0.0927626	101114539	annot_exons
Circ_004407	0	0	0	0	138.818	395.554	143.487	76.2563	0.001	188.529	17.5244	8.42284e-06	0.000369444	101118116	one_exon
Circ_004408	0	0	0	0	180.463	514.22	275.018	127.094	0.001	274.199	18.0649	1.07386e-07	8.61754e-06	101118116	one_exon
Circ_004421	0	0	0	0	69.4088	52.7405	59.7864	38.1282	0.001	55.016	15.7476	0.00174857	0.0282647	105607823	one_exon
Circ_004439	0	0	0	0	69.4088	79.1108	59.7864	76.2563	0.001	71.1406	16.1184	0.000179529	0.00466432	101104254	annot_exons
Circ_004442	0	0	0	0	69.4088	105.481	0	76.2563	0.001	62.7865	15.9382	0.00332769	0.0468966	101104254	annot_exons
Circ_004445	0	0	0	0	152.699	65.9257	47.8292	12.7094	0.001	69.7909	16.0908	0.00194441	0.0307783	101104254	annot_exons
Circ_004451	0	0	0	0	13.8818	13.1851	47.8292	76.2563	0.001	37.7881	15.2056	0.0261964	0.217028	101104254	annot_exons
Circ_004459	0	0	0	0	0	118.666	95.6583	101.675	0.001	78.9999	16.2696	0.000873319	0.016314	101120679	annot_exons
Circ_004465	19.581	0	0	0	27.7635	210.962	59.7864	114.384	4.89524	103.224	4.39826	0.00290937	0.0421322	101108583	annot_exons
Circ_004498	0	0	0	0	0	52.7405	71.7437	38.1282	0.001	40.6531	15.3111	0.0210703	0.186951	101114286	annot_exons
Circ_004508	0	0	0	0	27.7635	92.2959	11.9573	25.4188	0.001	39.3589	15.2644	0.027266	0.222891	101114536	annot_exons
Circ_004509	0	0	0	0	83.2905	13.1851	0	114.384	0.001	52.715	15.6859	0.0186034	0.17113	101114536	annot_exons
Circ_004515	469.943	727.785	1062.05	696.806	69.4088	290.073	119.573	381.282	739.147	215.084	-1.78096	0.00211352	0.0327397	101115045	annot_exons
Circ_004518	0	0	0	0	13.8818	105.481	35.8719	63.5469	0.001	54.6954	15.7391	0.0046296	0.0610172	101115045	exon_intron
Circ_004522	0	0	0	0	27.7635	39.5554	59.7864	0	0.001	31.7763	14.9557	0.0447782	0.309518	101115045	annot_exons
Circ_004527	0	0	0	0	13.8818	79.1108	95.6583	76.2563	0.001	66.2268	16.0151	0.000989285	0.0179367	NA	intergenic
Circ_004529	0	0	0	0	97.1723	0	23.9146	152.513	0.001	68.3999	16.0617	0.00526445	0.0674188	NA	intergenic
Circ_004533	39.1619	22.7433	25.287	27.8722	83.2905	224.147	107.616	165.222	28.7661	145.069	2.3343	0.00368168	0.051002	NA	intergenic
Circ_004540	646.172	796.015	834.471	668.934	957.841	2122.81	1901.21	2058.92	736.398	1760.19	1.25718	0.000502456	0.0104434	101115807	annot_exons
Circ_004542	0	0	0	0	69.4088	65.9257	11.9573	25.4188	0.001	43.1776	15.398	0.0150544	0.145991	101116328	exon_intron
Circ_004543	0	0	25.287	0	305.399	408.739	275.018	203.35	6.32175	298.126	5.55946	3.67441e-09	4.24499e-07	NA	intergenic
Circ_004545	0	22.7433	0	0	111.054	237.332	167.402	88.9657	5.68582	151.189	4.73284	2.11477e-05	0.000802252	443016	one_exon
Circ_004546	0	0	0	0	27.7635	52.7405	35.8719	12.7094	0.001	32.2713	14.978	0.0287095	0.230968	443016	one_exon
Circ_004547	19.581	0	25.287	0	83.2905	184.592	95.6583	114.384	11.217	119.481	3.41303	0.000408655	0.0088181	443016	one_exon
Circ_004551	665.753	909.732	859.758	668.934	319.28	131.851	227.188	368.572	776.044	261.723	-1.5681	8.019e-05	0.00242093	101117774	annot_exons
Circ_004560	0	0	0	0	41.6453	26.3703	59.7864	12.7094	0.001	35.1278	15.1003	0.029202	0.233032	101117774	annot_exons
Circ_004565	0	0	25.287	0	430.334	501.035	765.266	571.922	6.32175	567.14	6.48724	6.82027e-15	2.72048e-12	101117774	annot_exons
Circ_004572	0	0	0	0	55.527	105.481	227.188	203.35	0.001	147.887	17.1741	1.89211e-05	0.000731076	101107974	annot_exons
Circ_004577	0	0	0	0	69.4088	39.5554	23.9146	165.222	0.001	74.5252	16.1854	0.000806613	0.0152921	101107974	annot_exons
Circ_004601	0	0	0	0	180.463	158.222	143.487	50.8375	0.001	133.252	17.0238	2.38401e-05	0.000891914	101111111	one_exon
Circ_004619	0	0	0	0	41.6453	52.7405	47.8292	38.1282	0.001	45.0858	15.4604	0.00464731	0.061159	101102913	exon_intron
Circ_004620	0	0	0	0	13.8818	52.7405	59.7864	38.1282	0.001	41.1342	15.3281	0.0115946	0.121613	101102913	annot_exons
Circ_004629	254.553	295.663	354.018	529.572	13.8818	0	0	12.7094	358.451	6.64779	-5.75276	1.12989e-12	2.94683e-10	443483	annot_exons
Circ_004630	0	90.9732	25.287	83.6167	0	0	0	0	49.9692	0.001	-15.6088	0.0206874	0.18473	443483	annot_exons
Circ_004639	0	0	0	0	97.1723	26.3703	0	139.803	0.001	65.8365	16.0066	0.00608743	0.0752578	101110071	annot_exons
Circ_004643	0	0	0	0	55.527	39.5554	35.8719	88.9657	0.001	54.98	15.7466	0.0023241	0.035104	101112073	annot_exons
Circ_004645	0	250.176	151.722	195.106	0	13.1851	11.9573	0	149.251	6.28561	-4.56954	0.000503769	0.0104627	101112073	annot_exons
Circ_004651	0	0	25.287	0	249.872	131.851	167.402	50.8375	6.32175	149.991	4.5684	9.45876e-05	0.0027587	101119323	annot_exons
Circ_004672	0	0	0	0	0	39.5554	59.7864	38.1282	0.001	34.3675	15.0688	0.0410492	0.294789	101123392	annot_exons
Circ_004696	0	0	0	0	83.2905	0	35.8719	38.1282	0.001	39.3226	15.2631	0.0322489	0.248924	101102654	annot_exons
Circ_004699	0	0	0	0	55.527	105.481	35.8719	38.1282	0.001	58.752	15.8424	0.00178092	0.0285972	101102654	annot_exons
Circ_004709	293.715	454.866	783.897	1031.27	291.517	237.332	71.7437	152.513	640.938	188.276	-1.76733	0.00308445	0.0440097	101107536	annot_exons
Circ_004726	0	113.716	25.287	139.361	0	0	0	0	69.5912	0.001	-16.0866	0.00735171	0.0863887	101122961	annot_exons
Circ_004732	2114.74	2115.13	2731	3316.8	7468.38	4944.42	6038.43	5579.42	2569.42	6007.67	1.22536	5.11053e-06	0.000243915	101111036	exon_intron
Circ_004740	0	0	0	0	27.7635	52.7405	23.9146	12.7094	0.001	29.282	14.8377	0.0455621	0.312314	101105930	annot_exons
Circ_004741	97.9048	250.176	126.435	306.595	27.7635	13.1851	23.9146	38.1282	195.278	25.7478	-2.923	9.43207e-05	0.00275388	101113086	antisense
Circ_004742	19.581	181.946	75.861	0	0	26.3703	0	0	69.3471	6.59257	-3.39492	0.0299804	0.236874	101113086	antisense
Circ_004745	352.457	1046.19	379.305	111.489	13.8818	0	0	0	472.361	3.47044	-7.08863	5.21489e-09	5.76751e-07	101113086	exon_intron
Circ_004751	0	0	0	27.8722	388.689	118.666	107.616	203.35	6.96806	204.58	4.87577	8.43111e-06	0.000369444	101109026	annot_exons
Circ_004752	78.3239	0	0	0	194.345	92.2959	71.7437	152.513	19.581	127.724	2.70551	0.0078552	0.0909239	101109026	annot_exons
Circ_004756	58.7429	90.9732	25.287	0	0	0	0	0	43.7508	0.001	-15.417	0.0237466	0.201963	NA	intergenic
Circ_004767	0	0	0	0	41.6453	26.3703	23.9146	25.4188	0.001	29.3372	14.8404	0.0371154	0.275436	101115046	one_exon
Circ_004774	0	0	0	0	152.699	79.1108	83.701	127.094	0.001	110.651	16.7557	4.55467e-05	0.00156007	NA	intergenic
Circ_004777	0	113.716	151.722	0	0	0	0	0	66.3596	0.001	-16.018	0.016768	0.158749	101116241	exon_intron
Circ_004779	0	363.893	429.879	0	13.8818	0	0	0	198.443	3.47044	-5.83746	0.00355798	0.0494906	101116241	exon_intron
Circ_004799	0	0	0	0	83.2905	105.481	275.018	63.5469	0.001	131.834	17.0084	9.32683e-05	0.00273521	101120000	annot_exons
Circ_004819	195.81	22.7433	126.435	0	13.8818	0	0	0	86.247	3.47044	-4.63528	0.00994264	0.108394	101121022	annot_exons
Circ_004821	528.686	90.9732	202.296	167.233	27.7635	52.7405	95.6583	0	247.297	44.0406	-2.48934	0.00395918	0.053829	101121022	annot_exons
Circ_004822	372.038	204.69	50.574	83.6167	13.8818	0	11.9573	50.8375	177.73	19.1691	-3.21283	0.00116703	0.0204751	101121022	annot_exons
Circ_004829	97.9048	90.9732	227.583	55.7445	0	13.1851	0	0	118.051	3.29628	-5.16243	2.0995e-05	0.000798695	101121788	annot_exons
Circ_004830	19.581	0	101.148	83.6167	0	0	0	0	51.0864	0.001	-15.6407	0.0224961	0.19476	101121788	annot_exons
Circ_004831	78.3239	90.9732	0	55.7445	0	0	0	0	56.2604	0.001	-15.7798	0.00969683	0.106441	101121788	annot_exons
Circ_004846	0	0	0	0	69.4088	263.703	11.9573	38.1282	0.001	95.7992	16.5477	0.00119308	0.0208379	101121788	annot_exons
Circ_004855	19.581	0	0	0	249.872	13.1851	83.701	88.9657	4.89524	108.931	4.47589	0.00461807	0.0609541	106990151	annot_exons
Circ_004864	117.486	181.946	252.87	195.106	27.7635	26.3703	95.6583	0	186.852	37.448	-2.31893	0.00186529	0.0298138	101122708	annot_exons
Circ_004871	0	0	0	0	55.527	52.7405	23.9146	50.8375	0.001	45.7549	15.4816	0.00550676	0.0697643	101123389	annot_exons
Circ_004872	0	0	0	0	166.581	224.147	191.317	381.282	0.001	240.832	17.8777	1.03316e-08	1.04956e-06	101123389	annot_exons
Circ_004885	293.715	409.379	151.722	195.106	83.2905	118.666	167.402	76.2563	262.48	111.404	-1.23641	0.0263068	0.217545	101102073	annot_exons
Circ_004893	97.9048	386.636	202.296	111.489	41.6453	118.666	11.9573	101.675	199.581	68.486	-1.5431	0.041154	0.294917	101102073	annot_exons
Circ_004894	39.1619	45.4866	101.148	167.233	55.527	26.3703	0	0	88.2575	20.4743	-2.1079	0.0374852	0.276968	101102073	annot_exons
Circ_004898	0	0	0	0	41.6453	26.3703	47.8292	25.4188	0.001	35.3159	15.108	0.0225681	0.195112	554335	annot_exons
Circ_004912	19.581	45.4866	75.861	83.6167	0	0	11.9573	12.7094	56.1363	6.16667	-3.18637	0.0182447	0.16884	101123056	intronic
Circ_004915	156.648	45.4866	177.009	139.361	13.8818	0	0	12.7094	129.626	6.64779	-4.28534	4.86773e-05	0.00164875	101123056	exon_intron
Circ_004918	0	0	0	0	69.4088	0	35.8719	25.4188	0.001	32.6749	14.9959	0.048257	0.323201	101102746	annot_exons
Circ_004934	489.524	477.609	657.462	418.084	2346.02	2518.36	2941.49	3990.75	510.67	2949.15	2.52984	2.43053e-14	8.67442e-12	101106443	annot_exons
Circ_004957	704.915	955.218	910.332	557.445	83.2905	131.851	179.359	152.513	781.978	136.753	-2.51555	1.13272e-09	1.45657e-07	105612388	annot_exons
Circ_004958	58.7429	0	25.287	27.8722	97.1723	92.2959	107.616	139.803	27.9755	109.222	1.96502	0.0123758	0.127152	105612388	annot_exons
Circ_004961	0	0	0	0	124.936	184.592	107.616	101.675	0.001	129.705	16.9849	6.21471e-06	0.000286193	101106024	exon_intron
Circ_004963	0	0	0	0	97.1723	79.1108	11.9573	12.7094	0.001	50.2374	15.6165	0.0116362	0.121908	101106024	antisense
Circ_004964	0	0	0	0	27.7635	0	23.9146	406.7	0.001	114.595	16.8062	0.00387064	0.0529135	101106024	antisense
Circ_004965	0	0	25.287	0	111.054	329.628	59.7864	25.4188	6.32175	131.472	4.37829	0.00217805	0.0335286	101106024	antisense
Circ_004981	117.486	22.7433	25.287	27.8722	13.8818	0	0	0	48.3471	3.47044	-3.80024	0.0439461	0.306892	NA	intergenic
Circ_004983	0	0	0	0	41.6453	131.851	131.53	177.931	0.001	120.74	16.8815	5.70013e-05	0.00186277	101116491	annot_exons
Circ_005039	0	0	0	27.8722	235.99	118.666	263.06	190.641	6.96806	202.089	4.85809	1.48415e-06	8.38667e-05	101115294	annot_exons
Circ_005078	19.581	113.716	75.861	139.361	13.8818	0	0	0	87.1299	3.47044	-4.64998	0.000289142	0.00674349	100217405	annot_exons
Circ_005082	19.581	45.4866	278.157	83.6167	27.7635	26.3703	11.9573	0	106.71	16.5228	-2.69117	0.0135734	0.135513	101111818	annot_exons
Circ_005088	0	0	0	0	111.054	65.9257	71.7437	152.513	0.001	100.309	16.6141	0.000132557	0.0036726	101113084	annot_exons
Circ_005113	0	0	0	0	69.4088	39.5554	11.9573	127.094	0.001	62.0038	15.9201	0.00276349	0.0404953	101108240	annot_exons
Circ_005133	0	0	0	0	69.4088	39.5554	23.9146	12.7094	0.001	36.397	15.1515	0.0217517	0.190326	101117261	annot_exons
Circ_005136	19.581	45.4866	75.861	83.6167	0	13.1851	11.9573	0	56.1363	6.28561	-3.15881	0.0182341	0.168799	101117261	antisense
Circ_005137	0	0	0	0	41.6453	39.5554	155.445	63.5469	0.001	75.0481	16.1955	0.000470585	0.00990236	101117261	annot_exons
Circ_005143	78.3239	159.203	303.444	27.8722	0	13.1851	11.9573	0	142.211	6.28561	-4.49984	0.000208517	0.00519837	101117261	annot_exons
Circ_005145	117.486	45.4866	75.861	27.8722	13.8818	0	0	12.7094	66.6764	6.64779	-3.32623	0.00552794	0.0699346	101117261	annot_exons
Circ_005147	78.3239	90.9732	25.287	0	0	0	0	0	48.646	0.001	-15.57	0.0176747	0.164854	101117261	annot_exons
Circ_005152	0	90.9732	25.287	139.361	694.088	857.034	884.839	393.991	63.9053	707.488	3.4687	7.58897e-07	4.605e-05	101117261	annot_exons
Circ_005214	58.7429	113.716	25.287	111.489	0	0	0	0	77.3088	0.001	-16.2383	0.000569172	0.0115816	101120257	annot_exons
Circ_005236	0	68.2299	328.731	55.7445	0	0	0	0	113.176	0.001	-16.7882	0.00132735	0.0226434	101123479	annot_exons
Circ_005256	0	0	0	0	27.7635	39.5554	11.9573	38.1282	0.001	29.3511	14.8411	0.042002	0.298347	101121111	annot_exons
Circ_005257	0	0	0	0	124.936	26.3703	155.445	139.803	0.001	111.639	16.7685	0.000232605	0.00566355	101121111	annot_exons
Circ_005258	0	45.4866	0	0	721.851	355.999	633.736	292.316	11.3716	500.976	5.46123	1.10164e-09	1.4297e-07	101121111	annot_exons
Circ_005259	0	0	0	0	69.4088	26.3703	95.6583	76.2563	0.001	66.9234	16.0302	0.000608071	0.0121992	101121111	annot_exons
Circ_005263	372.038	272.92	404.592	250.85	111.054	26.3703	167.402	38.1282	325.1	85.7386	-1.92287	0.00138559	0.0234745	554322	annot_exons
Circ_005276	58.7429	250.176	0	27.8722	0	0	0	0	84.1978	0.001	-16.3615	0.00347195	0.0484929	101122877	annot_exons
Circ_005277	372.038	1614.77	809.184	919.784	83.2905	39.5554	23.9146	76.2563	928.945	55.7542	-4.05844	2.75848e-09	3.28162e-07	101122877	annot_exons
Circ_005293	0	0	0	0	27.7635	13.1851	59.7864	25.4188	0.001	31.5385	14.9448	0.0463722	0.315547	101106607	annot_exons
Circ_005298	0	68.2299	0	0	138.818	421.924	275.018	317.735	17.0575	288.374	4.07946	9.34351e-06	0.000402275	101106862	annot_exons
Circ_005302	97.9048	90.9732	75.861	27.8722	0	0	23.9146	0	73.1528	5.97864	-3.61302	0.00342552	0.0480595	101107807	annot_exons
Circ_005304	78.3239	45.4866	0	55.7445	0	0	0	0	44.8887	0.001	-15.4541	0.0201959	0.181749	101108067	annot_exons
Circ_005327	234.972	227.433	101.148	111.489	27.7635	118.666	0	12.7094	168.76	39.7848	-2.08469	0.0169574	0.159928	101104330	annot_exons
Circ_005332	0	0	0	0	41.6453	105.481	0	50.8375	0.001	49.491	15.5949	0.0120353	0.124645	101104330	annot_exons
Circ_005335	0	0	0	27.8722	27.7635	263.703	35.8719	38.1282	6.96806	91.3665	3.71284	0.0160373	0.153222	101104330	annot_exons
Circ_005338	0	0	0	0	97.1723	263.703	143.487	0	0.001	126.091	16.9441	0.000297487	0.00688483	101104330	annot_exons
Circ_005339	0	0	0	0	0	105.481	167.402	50.8375	0.001	80.9302	16.3044	0.00157434	0.025896	101104330	annot_exons
Circ_005341	0	0	0	0	0	105.481	35.8719	25.4188	0.001	41.6929	15.3475	0.0297618	0.235834	101104330	annot_exons
Circ_005351	0	0	50.574	0	13.8818	237.332	23.9146	88.9657	12.6435	91.0236	2.84784	0.042631	0.301204	101104330	annot_exons
Circ_005355	0	0	0	0	55.527	118.666	47.8292	50.8375	0.001	68.215	16.0578	0.000582168	0.0117666	101104330	annot_exons
Circ_005378	0	0	0	0	13.8818	52.7405	23.9146	38.1282	0.001	32.1663	14.9733	0.028611	0.230623	101104330	annot_exons
Circ_005380	0	0	0	0	0	52.7405	71.7437	101.675	0.001	56.5398	15.787	0.00688484	0.0823025	101104330	annot_exons
Circ_005381	19.581	0	0	0	166.581	197.777	35.8719	139.803	4.89524	135.008	4.78552	0.000203936	0.00511235	101104330	annot_exons
Circ_005383	0	0	0	0	13.8818	26.3703	23.9146	63.5469	0.001	31.9284	14.9626	0.0323666	0.24969	101104330	annot_exons
Circ_005389	0	45.4866	0	0	111.054	65.9257	119.573	12.7094	11.3716	77.3155	2.76532	0.0313749	0.243913	101104593	annot_exons
Circ_005391	137.067	250.176	252.87	27.8722	13.8818	13.1851	95.6583	0	166.996	30.6813	-2.44438	0.0156048	0.149881	101104593	annot_exons
Circ_005392	97.9048	113.716	75.861	0	0	26.3703	23.9146	0	71.8706	12.5712	-2.51528	0.046418	0.315708	101111038	annot_exons
Circ_005406	19.581	90.9732	25.287	27.8722	0	0	0	0	40.9283	0.001	-15.3208	0.0222338	0.193354	101114291	annot_exons
Circ_005408	411.2	250.176	581.601	529.572	152.699	171.407	155.445	101.675	443.138	145.306	-1.60866	0.000473136	0.00993292	101114291	annot_exons
Circ_005426	0	0	0	0	0	39.5554	59.7864	38.1282	0.001	34.3675	15.0688	0.0410305	0.294781	101116161	annot_exons
Circ_005443	0	0	0	0	97.1723	39.5554	143.487	165.222	0.001	111.359	16.7649	0.000149001	0.00402962	101107374	annot_exons
Circ_005456	215.391	68.2299	126.435	167.233	41.6453	0	0	12.7094	144.322	13.5887	-3.40882	0.00028455	0.00665355	101118462	antisense
Circ_005466	39.1619	113.716	75.861	139.361	263.753	487.85	657.651	355.863	92.0252	441.279	2.26159	8.19632e-05	0.00246745	101118462	annot_exons
Circ_005467	176.229	295.663	328.731	334.467	69.4088	131.851	59.7864	88.9657	283.772	87.5031	-1.69733	0.00104341	0.018718	101118462	annot_exons
Circ_005468	176.229	113.716	101.148	83.6167	13.8818	65.9257	0	63.5469	118.677	35.8386	-1.72746	0.0279234	0.226765	101118462	annot_exons
Circ_005471	19.581	90.9732	151.722	195.106	27.7635	13.1851	11.9573	0	114.345	13.2265	-3.1119	0.00410565	0.0553488	101118462	annot_exons
Circ_005497	156.648	113.716	101.148	27.8722	13.8818	39.5554	11.9573	12.7094	99.8461	19.526	-2.35431	0.00926307	0.102635	101119149	annot_exons
Circ_005509	156.648	250.176	177.009	250.85	138.818	131.851	11.9573	63.5469	208.671	86.5433	-1.26974	0.0413538	0.295723	100302102	annot_exons
Circ_005518	39.1619	0	25.287	27.8722	152.699	316.443	59.7864	50.8375	23.0803	144.942	2.65074	0.00848993	0.0960304	101122612	annot_exons
Circ_005519	0	0	0	0	27.7635	105.481	11.9573	12.7094	0.001	39.4778	15.2688	0.0359211	0.268716	101122612	annot_exons
Circ_005544	0	0	0	0	41.6453	0	23.9146	63.5469	0.001	32.2767	14.9782	0.0474028	0.319935	101102827	annot_exons
Circ_005546	234.972	272.92	50.574	167.233	0	65.9257	0	25.4188	181.425	22.8361	-2.98998	0.00129144	0.0221736	101102827	annot_exons
Circ_005549	78.3239	90.9732	126.435	111.489	13.8818	39.5554	0	25.4188	101.805	19.714	-2.36852	0.00467483	0.0614342	101102827	annot_exons
Circ_005552	215.391	568.582	328.731	306.595	83.2905	250.518	71.7437	101.675	354.825	126.807	-1.48448	0.0105693	0.113313	101102827	annot_exons
Circ_005585	195.81	181.946	101.148	139.361	27.7635	13.1851	0	0	154.566	10.2372	-3.91634	1.04074e-05	0.000441079	101108241	annot_exons
Circ_005601	195.81	113.716	126.435	418.084	55.527	52.7405	95.6583	38.1282	213.511	60.5135	-1.81898	0.00786081	0.0909239	101109724	annot_exons
Circ_005603	58.7429	22.7433	126.435	55.7445	0	0	0	12.7094	65.9164	3.17735	-4.37474	0.00211113	0.0327213	101109724	annot_exons
Circ_005638	0	0	0	0	124.936	118.666	35.8719	114.384	0.001	98.4646	16.5873	0.000279469	0.0065517	105606459	annot_exons
Circ_005654	0	0	0	0	55.527	65.9257	59.7864	12.7094	0.001	48.4871	15.5653	0.00741151	0.0868755	101115220	annot_exons
Circ_005655	19.581	0	0	0	27.7635	26.3703	59.7864	114.384	4.89524	57.0762	3.54344	0.0167896	0.158842	101115220	annot_exons
Circ_005685	0	0	0	0	55.527	52.7405	107.616	25.4188	0.001	60.3255	15.8805	0.00188831	0.030115	443507	antisense
Circ_005690	0	45.4866	0	0	83.2905	79.1108	251.103	127.094	11.3716	135.15	3.57104	0.000702149	0.0137311	101114630	one_exon
Circ_005694	841.982	659.556	531.027	613.189	97.1723	26.3703	179.359	216.06	661.438	129.74	-2.34998	1.50707e-05	0.000600263	101114630	annot_exons
Circ_005708	0	0	0	0	97.1723	0	59.7864	12.7094	0.001	42.417	15.3724	0.033553	0.256148	100125623	annot_exons
Circ_005709	0	0	0	0	41.6453	26.3703	11.9573	38.1282	0.001	29.5252	14.8497	0.0426022	0.301081	100125623	annot_exons
Circ_005712	0	0	0	27.8722	41.6453	237.332	143.487	152.513	6.96806	143.744	4.36661	0.000146108	0.00396701	100125623	annot_exons
Circ_005745	137.067	90.9732	25.287	0	9800.52	4641.17	4436.15	9049.08	63.3317	6981.73	6.78451	1.046e-18	7.46622e-16	NA	intergenic
Circ_005753	0	0	0	27.8722	138.818	131.851	251.103	292.316	6.96806	203.522	4.86828	3.38926e-06	0.000170267	101122804	exon_intron
Circ_005756	0	0	0	0	41.6453	26.3703	11.9573	38.1282	0.001	29.5252	14.8497	0.0426024	0.301081	101104166	annot_exons
Circ_005757	58.7429	341.149	50.574	362.339	27.7635	0	35.8719	12.7094	203.201	19.0862	-3.41231	0.000878412	0.0163865	101104166	annot_exons
Circ_005772	137.067	90.9732	0	0	180.463	197.777	334.804	317.735	57.01	257.695	2.17638	0.00841054	0.0955307	101108848	annot_exons
Circ_005815	78.3239	113.716	50.574	0	0	0	0	0	60.6536	0.001	-15.8883	0.0072301	0.085362	NA	intergenic
Circ_005816	78.3239	90.9732	25.287	83.6167	0	0	0	0	69.5502	0.001	-16.0858	0.000974777	0.0177388	NA	intergenic
Circ_005825	156.648	181.946	227.583	222.978	83.2905	26.3703	95.6583	38.1282	197.289	60.8618	-1.6967	0.00359904	0.0499848	105601941	annot_exons
Circ_005832	117.486	22.7433	101.148	55.7445	0	0	11.9573	0	74.2804	2.98932	-4.63509	0.000829849	0.0156529	101112496	exon_intron
Circ_005839	0	0	0	27.8722	83.2905	65.9257	59.7864	76.2563	6.96806	71.3147	3.35537	0.00464656	0.061159	101116333	annot_exons
Circ_005868	176.229	136.46	75.861	55.7445	55.527	26.3703	35.8719	25.4188	111.073	35.797	-1.6336	0.0331874	0.254274	101115296	annot_exons
Circ_005870	137.067	45.4866	0	55.7445	138.818	197.777	215.231	368.572	59.5745	230.099	1.94949	0.0109523	0.116361	101115296	annot_exons
Circ_005872	19.581	0	0	0	55.527	13.1851	71.7437	50.8375	4.89524	47.8234	3.28826	0.0305944	0.240355	101115296	antisense
Circ_005874	39.1619	45.4866	25.287	0	111.054	145.036	83.701	190.641	27.4839	132.608	2.27051	0.00415147	0.0558001	101115296	annot_exons
Circ_005900	137.067	204.69	227.583	278.722	124.936	92.2959	47.8292	50.8375	212.015	78.9746	-1.42471	0.0101823	0.110132	106990105	annot_exons
Circ_005901	352.457	204.69	252.87	139.361	69.4088	26.3703	59.7864	38.1282	237.345	48.4234	-2.29321	0.000142271	0.00387835	106990105	annot_exons
Circ_005918	39.1619	0	0	0	138.818	65.9257	95.6583	25.4188	9.79048	81.4551	3.05655	0.0174109	0.163014	101119234	exon_intron
Circ_005919	39.1619	0	0	0	97.1723	65.9257	107.616	127.094	9.79048	99.4519	3.34455	0.00207803	0.0323511	101119234	annot_exons
Circ_005921	0	0	0	0	83.2905	26.3703	23.9146	38.1282	0.001	42.9259	15.3896	0.0124993	0.128081	101119234	annot_exons
Circ_005933	137.067	250.176	151.722	278.722	0	39.5554	0	0	204.422	9.88885	-4.3696	2.09505e-06	0.0001132	101119920	annot_exons
Circ_005937	19.581	0	0	0	97.1723	39.5554	119.573	38.1282	4.89524	73.6072	3.91039	0.0089884	0.100206	101119920	annot_exons
Circ_005954	234.972	45.4866	0	0	291.517	303.258	286.975	775.273	70.1146	414.256	2.56274	0.00956446	0.105116	101118888	annot_exons
Circ_005969	0	0	0	0	13.8818	52.7405	47.8292	38.1282	0.001	38.1449	15.2192	0.0168297	0.159167	101119150	annot_exons
Circ_005975	0	0	0	0	41.6453	13.1851	71.7437	12.7094	0.001	34.8209	15.0877	0.0382472	0.280915	101122123	exon_intron
Circ_005977	430.781	386.636	252.87	501.7	55.527	224.147	179.359	25.4188	392.997	121.113	-1.69816	0.00735406	0.0863887	101122613	annot_exons
Circ_005981	19.581	0	0	0	69.4088	131.851	23.9146	50.8375	4.89524	69.0031	3.81721	0.0154061	0.148393	101122613	annot_exons
Circ_005987	0	0	0	0	83.2905	158.222	59.7864	76.2563	0.001	94.3887	16.5263	0.000320157	0.00728519	101123394	annot_exons
Circ_005989	509.105	568.582	303.444	1114.89	69.4088	105.481	59.7864	88.9657	624.005	80.9105	-2.94716	5.11859e-07	3.32941e-05	101123394	annot_exons
Circ_006004	0	0	0	0	0	39.5554	23.9146	76.2563	0.001	34.9316	15.0922	0.0484825	0.324141	NA	intergenic
Circ_006005	0	0	101.148	0	235.99	105.481	263.06	63.5469	25.287	167.02	2.72355	0.00944583	0.104319	101102999	antisense
Circ_006006	0	0	0	0	124.936	52.7405	59.7864	63.5469	0.001	75.2524	16.1995	0.000187334	0.00479816	101102999	exon_intron
Circ_006009	0	0	0	0	83.2905	79.1108	71.7437	12.7094	0.001	61.7136	15.9133	0.00158137	0.02598	101102999	exon_intron
Circ_006065	469.943	409.379	505.74	418.084	27.7635	26.3703	0	12.7094	450.787	16.7108	-4.75359	7.25513e-16	3.2798e-13	101108935	annot_exons
Circ_006067	0	68.2299	50.574	83.6167	0	0	0	0	50.6052	0.001	-15.627	0.0161976	0.15421	101109289	annot_exons
Circ_006068	509.105	796.015	455.166	111.489	111.054	0	35.8719	25.4188	467.944	43.0862	-3.44104	5.45856e-05	0.0017903	101109289	annot_exons
Circ_006070	176.229	45.4866	202.296	195.106	41.6453	0	0	12.7094	154.779	13.5887	-3.50974	0.000350508	0.00779277	101109289	annot_exons
Circ_006071	195.81	341.149	328.731	195.106	0	0	0	0	265.199	0.001	-18.0167	1.68553e-10	2.58296e-08	101109289	annot_exons
Circ_006081	39.1619	295.663	75.861	0	0	0	47.8292	0	102.671	11.9573	-3.10207	0.0478266	0.321818	101109289	annot_exons
Circ_006082	0	227.433	25.287	55.7445	0	0	0	0	77.1161	0.001	-16.2347	0.00634379	0.0777186	101109289	annot_exons
Circ_006083	39.1619	68.2299	151.722	111.489	0	0	0	0	92.6507	0.001	-16.4995	0.000126107	0.0035336	101109289	annot_exons
Circ_006085	58.7429	113.716	50.574	0	0	0	0	0	55.7583	0.001	-15.7669	0.0106058	0.113593	101109289	annot_exons
Circ_006087	0	22.7433	252.87	195.106	0	26.3703	23.9146	0	117.68	12.5712	-3.22667	0.0249025	0.209119	101109289	annot_exons
Circ_006090	215.391	363.893	404.592	836.167	83.2905	13.1851	23.9146	50.8375	455.011	42.8069	-3.40998	2.41193e-06	0.00012654	101109289	annot_exons
Circ_006091	39.1619	68.2299	25.287	111.489	13.8818	0	0	0	61.0419	3.47044	-4.13661	0.0147415	0.143831	101109289	annot_exons
Circ_006111	117.486	272.92	151.722	278.722	83.2905	118.666	71.7437	63.5469	205.212	84.3118	-1.28331	0.0313161	0.243789	101112662	annot_exons
Circ_006124	195.81	136.46	202.296	250.85	69.4088	52.7405	143.487	63.5469	196.354	82.2959	-1.25456	0.0230441	0.197925	101112915	annot_exons
Circ_006126	58.7429	318.406	278.157	222.978	13.8818	0	0	0	219.571	3.47044	-5.98343	1.82397e-07	1.37809e-05	101113611	annot_exons
Circ_006127	8693.95	13304.8	12719.4	10786.6	3997.95	3309.47	3802.42	4626.22	11376.2	3934.01	-1.53194	2.00819e-11	3.89073e-09	101113611	annot_exons
Circ_006128	78.3239	136.46	50.574	139.361	27.7635	13.1851	47.8292	38.1282	101.18	31.7265	-1.67316	0.0402839	0.291609	101113611	antisense
Circ_006129	58.7429	204.69	101.148	27.8722	55.527	13.1851	11.9573	0	98.1132	20.1674	-2.28243	0.0214007	0.188604	101113611	exon_intron
Circ_006131	0	0	0	0	97.1723	39.5554	0	50.8375	0.001	46.8913	15.517	0.0160039	0.152957	101113869	annot_exons
Circ_006157	176.229	0	101.148	27.8722	555.27	725.182	490.249	482.957	76.3122	563.415	2.88421	2.84393e-05	0.00103265	101104416	intronic
Circ_006158	19.581	0	0	0	124.936	52.7405	23.9146	50.8375	4.89524	63.1071	3.68835	0.00771923	0.0896686	101104416	intronic
Circ_006160	39.1619	0	0	0	180.463	0	11.9573	216.06	9.79048	102.12	3.38274	0.0275088	0.224271	101104416	exon_intron
Circ_006164	19.581	0	0	0	83.2905	65.9257	83.701	152.513	4.89524	96.3575	4.29894	0.000744009	0.0143327	101104416	annot_exons
Circ_006170	117.486	159.203	101.148	27.8722	0	0	0	0	101.427	0.001	-16.6301	7.52968e-05	0.00230774	101121028	annot_exons
Circ_006176	156.648	181.946	0	55.7445	0	0	0	12.7094	98.5846	3.17735	-4.95547	0.000721114	0.0140011	101122043	annot_exons
Circ_006178	117.486	45.4866	25.287	167.233	0	0	23.9146	0	88.8732	5.97864	-3.89386	0.00259457	0.0383384	101105675	annot_exons
Circ_006180	19.581	45.4866	75.861	0	0	0	0	0	35.2321	0.001	-15.1046	0.0498137	0.330646	101122294	annot_exons
Circ_006215	156.648	159.203	126.435	222.978	13.8818	13.1851	0	50.8375	166.316	19.4761	-3.09415	7.26424e-05	0.00224159	101102161	annot_exons
Circ_006216	58.7429	0	227.583	222.978	13.8818	0	0	0	127.326	3.47044	-5.19726	0.00200466	0.0314303	101102161	annot_exons
Circ_006226	176.229	45.4866	75.861	27.8722	13.8818	0	0	0	81.3621	3.47044	-4.55117	0.000559286	0.0114233	100653388	annot_exons
Circ_006229	19.581	0	75.861	27.8722	249.872	92.2959	346.761	101.675	30.8286	197.651	2.68062	0.00256768	0.0379954	NA	intergenic
Circ_006238	39.1619	45.4866	50.574	27.8722	111.054	118.666	131.53	88.9657	40.7737	112.554	1.46491	0.0388762	0.284447	101107980	annot_exons
Circ_006242	0	0	0	0	41.6453	0	95.6583	25.4188	0.001	40.6806	15.3121	0.027888	0.226681	101108506	annot_exons
Circ_006251	293.715	113.716	303.444	167.233	124.936	39.5554	131.53	38.1282	219.527	83.5374	-1.39391	0.0354875	0.266564	101110351	annot_exons
Circ_006264	0	0	0	0	416.453	0	119.573	0	0.001	134.006	17.0319	0.00391969	0.0534528	NA	intergenic
Circ_006266	0	0	0	0	83.2905	13.1851	71.7437	0	0.001	42.0548	15.36	0.0318862	0.246968	NA	intergenic
Circ_006267	0	0	0	0	27.7635	210.962	95.6583	152.513	0.001	121.724	16.8933	2.79161e-05	0.00101774	NA	intergenic
Circ_006270	0	0	0	0	194.345	13.1851	107.616	38.1282	0.001	88.3184	16.4304	0.000722699	0.0140118	101112664	exon_intron
Circ_006286	0	90.9732	177.009	0	0	0	0	0	66.9956	0.001	-16.0318	0.0175016	0.163675	101106864	annot_exons
Circ_006288	39.1619	0	0	0	69.4088	39.5554	83.701	50.8375	9.79048	60.8757	2.63641	0.0489157	0.325956	101108328	one_exon
Circ_006294	0	0	0	0	194.345	290.073	107.616	216.06	0.001	202.023	17.6242	1.30751e-07	1.03396e-05	NA	intergenic
Circ_006298	0	0	0	0	41.6453	39.5554	71.7437	0	0.001	38.2361	15.2226	0.0298278	0.236081	101105349	annot_exons
Circ_006303	0	0	0	0	27.7635	65.9257	59.7864	38.1282	0.001	47.9009	15.5478	0.00553978	0.070019	101110528	annot_exons
Circ_006327	78.3239	68.2299	25.287	0	0	0	0	0	42.9602	0.001	-15.3907	0.0231381	0.198607	101113426	annot_exons
Circ_006334	195.81	181.946	151.722	55.7445	0	0	0	0	146.306	0.001	-17.1586	2.1727e-06	0.000116467	101114040	annot_exons
Circ_006337	0	295.663	25.287	0	0	26.3703	0	0	80.2375	6.59257	-3.60536	0.0456157	0.312573	101114040	annot_exons
Circ_006343	234.972	227.433	429.879	362.339	69.4088	52.7405	191.317	101.675	313.656	103.785	-1.59558	0.00427998	0.0571226	101114040	annot_exons
Circ_006345	117.486	90.9732	25.287	111.489	27.7635	0	0	0	86.3087	6.94088	-3.63632	0.00136317	0.0231525	101114040	annot_exons
Circ_006362	0	0	0	0	27.7635	52.7405	11.9573	50.8375	0.001	35.8247	15.1287	0.0288044	0.231265	NA	intergenic
Circ_006365	39.1619	0	75.861	111.489	0	0	0	0	56.628	0.001	-15.7892	0.012611	0.128983	101108151	annot_exons
Circ_006384	19.581	0	50.574	0	152.699	145.036	95.6583	12.7094	17.5387	101.526	2.53323	0.0170247	0.160142	101117008	annot_exons
Circ_006387	0	0	0	0	55.527	39.5554	35.8719	12.7094	0.001	35.9159	15.1323	0.0269113	0.220888	101117008	annot_exons
Circ_006390	78.3239	113.716	25.287	167.233	333.162	421.924	346.761	508.375	96.1402	402.556	2.06598	0.000113111	0.00323974	101117008	annot_exons
Circ_006391	19.581	22.7433	25.287	27.8722	69.4088	52.7405	131.53	165.222	23.8709	104.725	2.13329	0.012251	0.126157	101117008	annot_exons
Circ_006399	78.3239	45.4866	75.861	83.6167	0	13.1851	11.9573	25.4188	70.822	12.6403	-2.48617	0.00946427	0.104438	101109728	exon_intron
Circ_006402	0	45.4866	0	27.8722	83.2905	171.407	119.573	165.222	18.3397	134.873	2.87856	0.000942699	0.0173237	101118373	exon_intron
Circ_006410	0	0	0	0	374.807	514.22	609.822	228.769	0.001	431.905	18.7204	6.7315e-12	1.48443e-09	101119744	annot_exons
Circ_006420	195.81	113.716	50.574	55.7445	69.4088	26.3703	23.9146	12.7094	103.961	33.1008	-1.65111	0.0414827	0.296255	101122455	annot_exons
Circ_006424	58.7429	0	126.435	27.8722	249.872	210.962	131.53	203.35	53.2625	198.929	1.90106	0.00850131	0.0961191	100125358	annot_exons
Circ_006425	0	68.2299	50.574	0	111.054	171.407	155.445	152.513	29.701	147.605	2.31315	0.00384758	0.0527346	100125358	annot_exons
Circ_006428	0	45.4866	0	0	55.527	92.2959	95.6583	63.5469	11.3716	76.757	2.75486	0.0120899	0.125068	100125358	annot_exons
Circ_006429	0	0	0	0	13.8818	65.9257	11.9573	76.2563	0.001	42.0053	15.3583	0.0196121	0.177675	100125358	annot_exons
Circ_006430	0	0	0	0	83.2905	52.7405	0	127.094	0.001	65.7812	16.0054	0.0038825	0.0529989	100125358	annot_exons
Circ_006438	97.9048	45.4866	75.861	27.8722	0	0	0	12.7094	61.7812	3.17735	-4.28127	0.00159226	0.0260957	101110782	annot_exons
Circ_006442	58.7429	204.69	25.287	27.8722	0	0	47.8292	12.7094	79.148	15.1346	-2.3867	0.0417231	0.297179	101110782	annot_exons
Circ_006449	78.3239	136.46	126.435	306.595	41.6453	26.3703	11.9573	12.7094	161.953	23.1706	-2.80521	0.000926733	0.0170998	443141	annot_exons
Circ_006454	0	0	101.148	0	83.2905	171.407	167.402	114.384	25.287	134.121	2.40707	0.0132059	0.133208	101111568	annot_exons
Circ_006459	0	0	0	0	13.8818	26.3703	11.9573	76.2563	0.001	32.1164	14.971	0.0430366	0.303093	101111568	annot_exons
Circ_006465	39.1619	0	0	0	27.7635	197.777	23.9146	63.5469	9.79048	78.2505	2.99865	0.0462257	0.314873	101111568	annot_exons
Circ_006475	176.229	0	0	55.7445	0	0	0	0	57.9933	0.001	-15.8236	0.0272759	0.222891	101112080	annot_exons
Circ_006497	176.229	113.716	151.722	195.106	27.7635	79.1108	11.9573	0	159.193	29.7079	-2.42186	0.00119538	0.0208512	101113089	annot_exons
Circ_006506	58.7429	0	25.287	55.7445	0	0	0	0	34.9436	0.001	-15.0927	0.0465102	0.31578	101102829	annot_exons
Circ_006507	0	0	0	0	55.527	65.9257	107.616	203.35	0.001	108.105	16.7221	0.000196349	0.00495881	101103745	annot_exons
Circ_006521	0	0	0	0	27.7635	131.851	0	63.5469	0.001	55.7904	15.7677	0.0110388	0.117185	101104515	annot_exons
Circ_006529	58.7429	0	0	0	97.1723	79.1108	35.8719	76.2563	14.6857	72.1028	2.29564	0.0493408	0.328422	101113873	annot_exons
Circ_006534	0	0	50.574	27.8722	69.4088	52.7405	143.487	76.2563	19.6116	85.4733	2.12377	0.0337792	0.25744	101105016	annot_exons
Circ_006535	137.067	22.7433	0	83.6167	0	0	0	12.7094	60.8567	3.17735	-4.25952	0.0309839	0.242524	101114376	annot_exons
Circ_006537	156.648	250.176	75.861	83.6167	13.8818	0	0	0	141.575	3.47044	-5.35031	3.85261e-06	0.000190343	101105429	annot_exons
Circ_006538	0	0	0	0	55.527	0	71.7437	50.8375	0.001	44.5271	15.4424	0.0136175	0.135745	101106191	exon_intron
Circ_006552	0	0	0	0	55.527	39.5554	95.6583	0	0.001	47.6852	15.5413	0.0154287	0.148558	101115641	annot_exons
Circ_006553	665.753	250.176	404.592	222.978	13.8818	13.1851	23.9146	38.1282	385.875	22.2774	-4.11448	1.89234e-08	1.80098e-06	101107883	annot_exons
Circ_006571	0	0	0	0	97.1723	197.777	358.719	114.384	0.001	192.013	17.5508	2.53537e-06	0.00013149	NA	intergenic
Circ_006574	0	0	0	0	55.527	52.7405	35.8719	76.2563	0.001	55.0989	15.7497	0.00188988	0.0301181	NA	intergenic
Circ_006576	0	0	0	0	957.841	2017.33	1721.85	1385.32	0.001	1520.58	20.5362	2.8883e-23	3.56101e-20	NA	intergenic
Circ_006588	117.486	68.2299	0	83.6167	0	0	0	0	67.3331	0.001	-16.039	0.00377265	0.0519701	101117182	annot_exons
Circ_006591	352.457	523.096	632.175	306.595	83.2905	26.3703	83.701	25.4188	453.581	54.6951	-3.05187	1.13384e-07	9.01887e-06	101117439	annot_exons
Circ_006592	78.3239	159.203	177.009	83.6167	0	0	47.8292	38.1282	124.538	21.4893	-2.5349	0.00255137	0.0378882	101117439	annot_exons
Circ_006593	195.81	363.893	126.435	0	69.4088	52.7405	35.8719	0	171.534	39.5053	-2.11838	0.0417354	0.297179	101117439	annot_exons
Circ_006596	58.7429	45.4866	0	139.361	13.8818	0	11.9573	0	60.8977	6.45976	-3.23683	0.0277613	0.225989	101117689	annot_exons
Circ_006626	254.553	136.46	379.305	195.106	0	79.1108	11.9573	50.8375	241.356	35.4764	-2.76623	0.000159461	0.00422797	101110692	annot_exons
Circ_006633	391.619	113.716	379.305	222.978	83.2905	39.5554	47.8292	25.4188	276.905	49.0235	-2.49785	0.000137842	0.00378423	443484	annot_exons
Circ_006634	156.648	181.946	202.296	195.106	27.7635	26.3703	83.701	0	183.999	34.4587	-2.41676	0.000396138	0.00860276	443484	exon_intron
Circ_006635	176.229	90.9732	25.287	55.7445	13.8818	13.1851	35.8719	0	87.0583	15.7347	-2.46803	0.0119764	0.124354	443484	annot_exons
Circ_006636	58.7429	90.9732	202.296	195.106	0	0	0	12.7094	136.779	3.17735	-5.42789	7.266e-06	0.00032738	443484	annot_exons
Circ_006640	0	0	0	0	124.936	52.7405	71.7437	279.607	0.001	132.257	17.013	0.000142091	0.00387733	100505388	annot_exons
Circ_006641	0	0	0	0	124.936	26.3703	23.9146	76.2563	0.001	62.8692	15.9401	0.00224294	0.0342554	100505388	annot_exons
Circ_006646	58.7429	113.716	151.722	0	0	39.5554	11.9573	0	81.0454	12.8782	-2.6538	0.0420176	0.298347	101112498	annot_exons
Circ_006658	78.3239	159.203	25.287	0	0	0	0	0	65.7035	0.001	-16.0037	0.00661317	0.0803295	101113514	annot_exons
Circ_006661	78.3239	45.4866	75.861	83.6167	0	0	47.8292	12.7094	70.822	15.1346	-2.22634	0.0231147	0.198469	101113514	annot_exons
Circ_006672	411.2	682.299	354.018	167.233	69.4088	79.1108	155.445	165.222	403.688	117.297	-1.78308	0.00255638	0.037911	101114797	annot_exons
Circ_006680	19.581	90.9732	75.861	55.7445	180.463	355.999	215.231	241.478	60.5399	248.293	2.03608	0.000668572	0.0131982	101115891	one_exon
Circ_006686	626.591	341.149	379.305	306.595	138.818	184.592	167.402	177.931	413.41	167.186	-1.30612	0.002417	0.0362321	101115891	annot_exons
Circ_006698	0	0	0	0	55.527	13.1851	59.7864	12.7094	0.001	35.302	15.1075	0.0361345	0.269444	101119238	exon_intron
Circ_006710	137.067	159.203	303.444	83.6167	27.7635	92.2959	59.7864	50.8375	170.833	57.6709	-1.56667	0.0241083	0.203966	NA	intergenic
Circ_006720	39.1619	136.46	101.148	250.85	27.7635	79.1108	0	38.1282	131.905	36.2506	-1.86342	0.0378399	0.27879	101117863	annot_exons
Circ_006729	0	0	0	0	41.6453	65.9257	11.9573	25.4188	0.001	36.2367	15.1452	0.0310213	0.242694	101118121	annot_exons
Circ_006732	19.581	0	0	0	249.872	118.666	251.103	139.803	4.89524	189.861	5.27742	1.14227e-06	6.63447e-05	101118121	annot_exons
Circ_006733	0	0	0	0	83.2905	171.407	131.53	101.675	0.001	121.976	16.8962	1.49201e-05	0.000596892	101118121	annot_exons
Circ_006736	19.581	0	0	0	222.108	303.258	131.53	177.931	4.89524	208.707	5.41395	2.88899e-07	2.02483e-05	101118121	annot_exons
Circ_006738	274.134	113.716	126.435	222.978	888.432	1503.11	1303.34	1093.01	184.316	1196.97	2.69914	3.26276e-10	4.6825e-08	101118121	annot_exons
Circ_006739	509.105	454.866	354.018	222.978	832.905	1041.63	884.839	1054.88	385.242	953.562	1.30756	0.000157069	0.00418431	101118121	annot_exons
Circ_006745	0	0	0	0	249.872	52.7405	143.487	101.675	0.001	136.944	17.0632	4.80426e-05	0.00163491	101119236	one_exon
Circ_006746	0	0	0	0	180.463	13.1851	107.616	50.8375	0.001	88.0253	16.4256	0.000511485	0.0105905	443027	intronic
Circ_006754	39.1619	250.176	126.435	222.978	0	0	0	0	159.688	0.001	-17.2849	5.13724e-06	0.000244461	101120935	antisense
Circ_006760	0	0	0	0	0	39.5554	95.6583	12.7094	0.001	36.9808	15.1745	0.0468948	0.317675	101121697	annot_exons
Circ_006764	0	0	0	0	69.4088	65.9257	131.53	152.513	0.001	104.844	16.6779	0.000105776	0.00303605	101121697	annot_exons
Circ_006765	704.915	1068.93	151.722	641.061	2512.6	764.738	1494.66	1639.51	641.658	1602.88	1.32079	0.0304616	0.239699	101121697	annot_exons
Circ_006774	0	0	0	0	111.054	39.5554	119.573	203.35	0.001	118.383	16.8531	0.000117861	0.00333721	101123318	annot_exons
Circ_006776	39.1619	0	0	0	180.463	39.5554	179.359	63.5469	9.79048	115.731	3.56325	0.00351111	0.0489894	101123318	annot_exons
Circ_006783	0	0	0	0	83.2905	39.5554	71.7437	25.4188	0.001	55.0021	15.7472	0.00271684	0.0399196	101123318	annot_exons
Circ_006785	0	0	0	0	41.6453	65.9257	35.8719	38.1282	0.001	45.3927	15.4702	0.00520685	0.0667757	101123318	annot_exons
Circ_006796	0	0	0	0	27.7635	65.9257	59.7864	101.675	0.001	63.7877	15.961	0.000987304	0.0179128	101123318	annot_exons
Circ_006797	0	0	25.287	0	111.054	197.777	119.573	88.9657	6.32175	129.342	4.35473	6.92677e-05	0.00216454	101123318	annot_exons
Circ_006810	0	0	0	0	55.527	118.666	71.7437	88.9657	0.001	83.7257	16.3534	0.000450452	0.00955282	101102003	annot_exons
Circ_006811	0	0	0	0	27.7635	39.5554	23.9146	38.1282	0.001	32.3404	14.9811	0.0228112	0.196547	101102003	exon_intron
Circ_006828	78.3239	159.203	202.296	111.489	13.8818	26.3703	23.9146	50.8375	137.828	28.751	-2.26118	0.00260211	0.0384211	101107038	annot_exons
Circ_006829	0	0	0	0	41.6453	52.7405	0	38.1282	0.001	33.1285	15.0158	0.0410088	0.294781	101107038	annot_exons
Circ_006834	0	0	0	0	97.1723	92.2959	71.7437	50.8375	0.001	78.0124	16.2514	0.000898919	0.0167231	101107038	one_exon
Circ_006836	117.486	45.4866	75.861	83.6167	13.8818	0	0	12.7094	80.6125	6.64779	-3.60006	0.000921792	0.0170202	101107038	annot_exons
Circ_006839	195.81	955.218	328.731	613.189	0	26.3703	23.9146	25.4188	523.237	18.9259	-4.78903	2.46937e-08	2.2782e-06	101107038	annot_exons
Circ_006840	97.9048	0	50.574	55.7445	0	0	0	0	51.0558	0.001	-15.6398	0.0158543	0.151687	101107038	annot_exons
Circ_006876	137.067	136.46	101.148	334.467	13.8818	13.1851	0	0	177.285	6.76672	-4.71147	4.47312e-06	0.000217511	101112998	annot_exons
Circ_006879	1977.68	2137.87	2174.68	1254.25	249.872	197.777	298.932	343.153	1886.12	272.434	-2.79145	7.63328e-15	3.00065e-12	101112998	annot_exons
Circ_006880	176.229	22.7433	101.148	27.8722	0	0	0	0	81.9981	0.001	-16.3233	0.00102449	0.0184639	101112998	annot_exons
Circ_006885	0	227.433	151.722	83.6167	55.527	13.1851	11.9573	0	115.693	20.1674	-2.52021	0.0254713	0.212816	101113871	annot_exons
Circ_006915	97.9048	90.9732	101.148	27.8722	27.7635	13.1851	35.8719	12.7094	79.4746	22.3825	-1.82812	0.0414775	0.296255	100188914	annot_exons
Circ_006928	0	0	0	0	41.6453	26.3703	35.8719	12.7094	0.001	29.1492	14.8312	0.0417409	0.297179	101112247	annot_exons
Circ_006943	58.7429	0	0	0	83.2905	39.5554	179.359	76.2563	14.6857	94.6154	2.68766	0.0223835	0.194095	101114546	one_exon
Circ_006969	0	0	0	0	97.1723	39.5554	47.8292	101.675	0.001	71.558	16.1268	0.000354407	0.00785371	101121444	antisense
Circ_006970	0	0	0	0	430.334	527.405	191.317	317.735	0.001	366.698	18.4842	1.05007e-10	1.69536e-08	101121444	intronic
Circ_006975	254.553	136.46	75.861	83.6167	0	52.7405	59.7864	0	137.623	28.1317	-2.29045	0.00997542	0.108708	101122456	annot_exons
Circ_007011	39.1619	0	0	0	111.054	224.147	167.402	50.8375	9.79048	138.36	3.82091	0.000679765	0.0133899	101120683	annot_exons
Circ_007013	39.1619	22.7433	101.148	83.6167	0	0	11.9573	0	61.6675	2.98932	-4.36662	0.00308067	0.0440069	101107460	annot_exons
Circ_007014	411.2	523.096	126.435	501.7	0	145.036	95.6583	0	390.608	60.1737	-2.69852	0.00280699	0.0409338	101121957	annot_exons
Circ_007015	58.7429	68.2299	75.861	0	13.8818	0	0	0	50.7085	3.47044	-3.86904	0.0451229	0.310933	101121957	annot_exons
Circ_007016	195.81	409.379	227.583	557.445	0	0	11.9573	0	347.554	2.98932	-6.86128	1.27521e-10	2.03463e-08	101121957	annot_exons
Circ_007017	802.82	864.245	708.036	1031.27	83.2905	250.518	71.7437	177.931	851.593	145.871	-2.54547	5.15183e-08	4.49319e-06	101121957	annot_exons
Circ_007031	0	0	0	0	13.8818	79.1108	59.7864	0	0.001	38.1947	15.2211	0.0410714	0.294857	101104261	one_exon
Circ_007043	0	0	25.287	0	55.527	92.2959	0	127.094	6.32175	68.7292	3.44253	0.0297375	0.235834	101109200	exon_intron
Circ_007049	0	0	0	0	41.6453	79.1108	35.8719	0	0.001	39.157	15.257	0.0313425	0.243789	101110436	annot_exons
Circ_007054	97.9048	45.4866	151.722	0	0	13.1851	0	0	73.7784	3.29628	-4.48429	0.00292699	0.0423422	101111476	annot_exons
Circ_007066	176.229	90.9732	202.296	0	13.8818	13.1851	23.9146	25.4188	117.374	19.1001	-2.61947	0.011687	0.122204	101113427	annot_exons
Circ_007067	78.3239	90.9732	227.583	27.8722	27.7635	0	35.8719	0	106.188	15.9088	-2.73872	0.00800061	0.0919528	101113427	annot_exons
Circ_007073	19.581	0	75.861	0	55.527	118.666	131.53	241.478	23.8605	136.8	2.51938	0.00890765	0.0993875	101116076	annot_exons
Circ_007074	137.067	0	75.861	0	319.28	369.184	346.761	203.35	53.2319	309.644	2.54025	0.00129708	0.022253	101116076	annot_exons
Circ_007083	411.2	386.636	0	306.595	13.8818	92.2959	59.7864	50.8375	276.108	54.2004	-2.34886	0.0130339	0.131912	NA	intergenic
Circ_007085	0	0	0	0	13.8818	26.3703	11.9573	127.094	0.001	44.8258	15.452	0.0215173	0.189001	101118123	annot_exons
Circ_007106	0	0	0	0	55.527	26.3703	47.8292	88.9657	0.001	54.673	15.7385	0.00256267	0.0379835	101120512	annot_exons
Circ_007108	0	0	0	0	235.99	26.3703	119.573	76.2563	0.001	114.547	16.8056	7.73798e-05	0.00235826	101120512	annot_exons
Circ_007130	0	0	0	0	41.6453	79.1108	95.6583	165.222	0.001	95.4091	16.5418	0.000357749	0.00791483	101102328	annot_exons
Circ_007131	0	0	0	0	319.28	92.2959	143.487	50.8375	0.001	151.475	17.2087	7.00365e-05	0.00218318	101102328	annot_exons
Circ_007143	0	0	0	0	111.054	65.9257	71.7437	25.4188	0.001	68.5356	16.0646	0.000708353	0.0138126	101122125	annot_exons
Circ_007156	372.038	409.379	101.148	473.828	41.6453	52.7405	71.7437	101.675	339.098	66.9512	-2.34052	0.000229681	0.0056125	101104081	annot_exons
Circ_007180	0	0	0	0	41.6453	52.7405	71.7437	25.4188	0.001	47.8871	15.5473	0.00580386	0.0727175	101104596	annot_exons
Circ_007184	0	0	0	0	0	26.3703	131.53	25.4188	0.001	45.8298	15.484	0.026574	0.21907	NA	intergenic
Circ_007188	0	0	0	0	13.8818	145.036	35.8719	50.8375	0.001	61.4069	15.9061	0.00440284	0.0584259	101107376	annot_exons
Circ_007190	0	0	0	0	55.527	26.3703	47.8292	12.7094	0.001	35.609	15.12	0.0286409	0.230795	101107376	annot_exons
Circ_007204	1331.51	1910.44	1770.09	1505.1	527.507	421.924	633.736	699.016	1629.28	570.546	-1.51382	6.10796e-08	5.25944e-06	101110165	annot_exons
Circ_007226	97.9048	90.9732	25.287	55.7445	0	26.3703	0	38.1282	67.4774	16.1246	-2.06514	0.037055	0.275289	101115146	annot_exons
Circ_007240	0	0	0	0	69.4088	0	35.8719	38.1282	0.001	35.8522	15.1298	0.0425329	0.301005	101115893	annot_exons
Circ_007259	156.648	295.663	455.166	195.106	69.4088	158.222	95.6583	165.222	275.646	122.128	-1.17442	0.0357991	0.268162	101120429	annot_exons
Circ_007263	19.581	68.2299	101.148	27.8722	0	0	23.9146	0	54.2078	5.97864	-3.18061	0.02747	0.224246	101116670	annot_exons
Circ_007271	0	0	0	0	69.4088	39.5554	83.701	88.9657	0.001	70.4077	16.1034	0.000259475	0.00614673	101116928	exon_intron
Circ_007272	372.038	90.9732	75.861	27.8722	458.098	395.554	502.206	559.213	141.686	478.768	1.75663	0.00924728	0.102502	101116928	annot_exons
Circ_007289	78.3239	204.69	101.148	557.445	41.6453	26.3703	35.8719	63.5469	235.402	41.8586	-2.49153	0.0028613	0.0415248	101119239	annot_exons
Circ_007303	0	0	0	0	0	26.3703	71.7437	63.5469	0.001	40.4152	15.3026	0.0239726	0.203063	NA	intergenic
Circ_007323	58.7429	22.7433	25.287	55.7445	0	0	0	0	40.6294	0.001	-15.3102	0.0158387	0.151599	101114132	annot_exons
Circ_007326	39.1619	136.46	25.287	83.6167	0	0	23.9146	0	71.1314	5.97864	-3.5726	0.00650531	0.0791966	101114381	intronic
Circ_007335	195.81	272.92	75.861	55.7445	0	13.1851	11.9573	12.7094	150.084	9.46295	-3.98733	0.000130185	0.00361968	101115151	antisense
Circ_007336	0	0	0	0	83.2905	0	71.7437	12.7094	0.001	41.9359	15.3559	0.0324654	0.250182	105602050	exon_intron
Circ_007337	0	113.716	0	306.595	0	0	0	0	105.078	0.001	-16.6811	0.00536324	0.0684898	101115646	antisense
Circ_007343	137.067	0	25.287	27.8722	0	0	0	0	47.5565	0.001	-15.5374	0.026439	0.218411	101116167	intronic
Circ_007350	0	0	0	0	124.936	0	1602.28	76.2563	0.001	450.867	18.7823	0.000149157	0.00402962	101115392	annot_exons
Circ_007378	0	0	0	27.8722	180.463	65.9257	23.9146	38.1282	6.96806	77.1078	3.46805	0.0154752	0.1489	101118979	annot_exons
Circ_007384	0	0	0	0	263.753	105.481	95.6583	76.2563	0.001	135.287	17.0457	3.89602e-05	0.00136532	101119328	one_exon
Circ_007385	0	0	0	0	138.818	52.7405	0	25.4188	0.001	54.2442	15.7272	0.0127957	0.130149	101119328	one_exon
Circ_007390	19.581	0	0	0	69.4088	39.5554	35.8719	50.8375	4.89524	48.9184	3.32093	0.0226488	0.19552	101120431	annot_exons
Circ_007391	234.972	500.353	126.435	306.595	138.818	52.7405	95.6583	152.513	292.088	109.932	-1.40979	0.0169771	0.159953	101120431	annot_exons
Circ_007394	58.7429	45.4866	50.574	195.106	27.7635	13.1851	23.9146	25.4188	87.4773	22.5705	-1.95447	0.0451657	0.310933	101120431	annot_exons
Circ_007397	156.648	0	0	0	0	1661.33	1135.94	1143.84	39.1619	985.278	4.65301	0.00277051	0.0405763	101120431	intronic
Circ_007407	0	0	0	0	111.054	65.9257	47.8292	50.8375	0.001	68.9116	16.0725	0.000490757	0.0102552	101120685	annot_exons
Circ_007408	0	0	0	0	249.872	250.518	215.231	292.316	0.001	251.984	17.943	8.99626e-11	1.48789e-08	101120685	annot_exons
Circ_007415	0	0	0	0	55.527	92.2959	11.9573	0	0.001	39.9451	15.2857	0.0450567	0.310933	105613298	exon_intron
Circ_007424	156.648	22.7433	25.287	55.7445	41.6453	0	0	0	65.1056	10.4113	-2.64463	0.042878	0.302555	101122126	annot_exons
Circ_007456	0	0	0	0	27.7635	224.147	95.6583	50.8375	0.001	99.6017	16.6039	0.000253395	0.00603963	101102412	annot_exons
Circ_007461	0	0	25.287	0	55.527	171.407	203.274	127.094	6.32175	139.325	4.46199	7.72952e-05	0.00235826	101123576	exon_intron
Circ_007464	0	0	0	0	55.527	26.3703	23.9146	25.4188	0.001	32.8077	15.0017	0.0260298	0.21611	101102257	annot_exons
Circ_007484	1233.6	1478.31	1744.8	836.167	458.098	329.628	418.505	368.572	1323.22	393.701	-1.74888	9.63361e-07	5.69285e-05	101105771	annot_exons
Circ_007485	195.81	250.176	126.435	418.084	55.527	65.9257	95.6583	101.675	247.626	79.6965	-1.63557	0.00494886	0.0641036	101105771	annot_exons
Circ_007492	1918.93	2456.28	1770.09	1867.44	791.26	329.628	573.95	711.726	2003.19	601.641	-1.73532	6.26832e-07	3.90855e-05	101106278	exon_intron
Circ_007494	0	45.4866	0	0	152.699	145.036	179.359	165.222	11.3716	160.579	3.81977	3.14279e-05	0.00113037	105612768	one_exon
Circ_007510	313.295	477.609	278.157	195.106	69.4088	92.2959	107.616	127.094	316.042	99.1035	-1.67311	0.00107668	0.0191249	101114803	annot_exons
Circ_007516	117.486	45.4866	101.148	0	0	13.1851	0	12.7094	66.0301	6.47363	-3.35048	0.0133535	0.134031	101110080	exon_intron
Circ_007517	0	0	0	55.7445	97.1723	65.9257	107.616	12.7094	13.9361	70.8557	2.34606	0.040101	0.290596	101110080	annot_exons
Circ_007519	78.3239	159.203	151.722	0	0	0	23.9146	38.1282	97.3122	15.5107	-2.64936	0.0187761	0.172288	101110080	annot_exons
Circ_007525	254.553	250.176	177.009	27.8722	55.527	39.5554	11.9573	12.7094	177.403	29.9373	-2.56701	0.0020446	0.0319272	101110353	annot_exons
Circ_007528	332.876	250.176	101.148	362.339	27.7635	79.1108	23.9146	25.4188	261.635	39.0519	-2.74409	8.57005e-05	0.00256289	101110353	annot_exons
Circ_007533	0	22.7433	25.287	0	138.818	184.592	83.701	114.384	12.0076	130.374	3.44064	0.000415312	0.00891212	101110353	annot_exons
Circ_007546	19.581	22.7433	50.574	0	124.936	158.222	179.359	203.35	23.2246	166.467	2.84151	0.000129678	0.003616	101110353	annot_exons
Circ_007547	0	0	0	0	27.7635	224.147	370.676	88.9657	0.001	177.888	17.4406	1.47942e-05	0.00059273	101110353	annot_exons
Circ_007565	39.1619	136.46	50.574	139.361	0	52.7405	0	12.7094	91.3892	16.3625	-2.48163	0.013963	0.138173	NA	intergenic
Circ_007582	137.067	22.7433	75.861	27.8722	0	0	0	0	65.8858	0.001	-16.0077	0.0024167	0.0362321	101117611	annot_exons
Circ_007584	97.9048	90.9732	202.296	111.489	0	39.5554	0	0	125.666	9.88885	-3.66765	0.000312996	0.00714622	101114129	one_exon
Circ_007610	78.3239	68.2299	75.861	55.7445	27.7635	13.1851	23.9146	0	69.5398	16.2158	-2.10044	0.0221469	0.192845	101118378	antisense
Circ_007614	0	0	0	0	13.8818	92.2959	107.616	101.675	0.001	78.8671	16.2671	0.000329862	0.00744357	101115816	annot_exons
Circ_007622	0	0	0	0	41.6453	171.407	83.701	25.4188	0.001	80.5429	16.2975	0.000559124	0.0114233	101116336	exon_intron
Circ_007630	881.144	1751.23	1340.21	724.678	235.99	184.592	167.402	419.41	1174.32	251.848	-2.22119	6.58636e-06	0.000300748	101119154	annot_exons
Circ_007632	0	0	25.287	0	83.2905	26.3703	107.616	76.2563	6.32175	73.3832	3.53705	0.00800951	0.0920161	101119495	intronic
Circ_007633	0	0	25.287	0	138.818	26.3703	83.701	88.9657	6.32175	84.4636	3.73993	0.0039851	0.0541	101119495	intronic
Circ_007634	0	22.7433	0	0	180.463	210.962	203.274	127.094	5.68582	180.448	4.98807	4.00223e-07	2.64772e-05	101119495	annot_exons
Circ_007643	0	90.9732	50.574	27.8722	0	0	0	0	42.3549	0.001	-15.3702	0.0366026	0.272375	101122209	annot_exons
Circ_007651	0	0	0	0	55.527	13.1851	0	76.2563	0.001	36.2421	15.1454	0.0422391	0.299449	101102834	exon_intron
Circ_007699	0	0	0	0	124.936	105.481	167.402	165.222	0.001	140.76	17.1029	2.03938e-06	0.000110632	101113262	annot_exons
Circ_007701	0	0	0	0	41.6453	158.222	35.8719	38.1282	0.001	68.4667	16.0631	0.00154682	0.0255673	101113262	annot_exons
Circ_007704	0	0	0	0	27.7635	26.3703	23.9146	38.1282	0.001	29.0441	14.826	0.0363403	0.270721	101113262	annot_exons
Circ_007710	0	0	0	0	124.936	39.5554	23.9146	0	0.001	47.1014	15.5235	0.023413	0.199852	101113262	annot_exons
Circ_007715	0	0	0	0	55.527	39.5554	35.8719	88.9657	0.001	54.98	15.7466	0.00232439	0.035104	101115644	one_exon
Circ_007718	19.581	68.2299	25.287	27.8722	0	0	0	0	35.2425	0.001	-15.105	0.0282482	0.228474	101109296	exon_intron
Circ_007723	0	0	0	0	0	39.5554	71.7437	38.1282	0.001	37.3568	15.1891	0.0303458	0.238856	101110083	annot_exons
Circ_007744	0	0	0	0	41.6453	39.5554	23.9146	12.7094	0.001	29.4562	14.8463	0.0425584	0.301005	101112156	annot_exons
Circ_007748	39.1619	0	0	0	416.453	487.85	322.847	800.691	9.79048	506.96	5.69435	4.71247e-11	8.30007e-09	101112156	annot_exons
Circ_007749	0	0	0	0	0	26.3703	47.8292	114.384	0.001	47.146	15.5248	0.0202524	0.182077	101112156	annot_exons
Circ_007751	58.7429	0	151.722	83.6167	152.699	342.813	131.53	279.607	73.5204	226.662	1.62433	0.0268427	0.220552	101112156	annot_exons
Circ_007791	0	0	0	0	69.4088	0	35.8719	63.5469	0.001	42.2069	15.3652	0.0209946	0.186468	101104927	antisense
Circ_007794	0	0	0	0	0	26.3703	47.8292	101.675	0.001	43.9686	15.4242	0.0259649	0.215906	101105593	exon_intron
Circ_007804	39.1619	0	0	0	97.1723	184.592	203.274	152.513	9.79048	159.388	4.02502	2.55241e-05	0.000949678	101115477	annot_exons
Circ_007805	0	0	0	0	55.527	39.5554	47.8292	38.1282	0.001	45.2599	15.4659	0.00473126	0.0619656	101115477	annot_exons
Circ_007809	0	0	0	0	13.8818	52.7405	11.9573	76.2563	0.001	38.709	15.2404	0.0272737	0.222891	101115477	annot_exons
Circ_007813	0	0	0	0	13.8818	26.3703	35.8719	50.8375	0.001	31.7404	14.954	0.0419279	0.297946	101115477	annot_exons
Circ_007816	0	0	0	0	166.581	13.1851	59.7864	139.803	0.001	94.839	16.5332	0.000346426	0.00772736	101115477	annot_exons
Circ_007825	0	0	0	0	0	145.036	71.7437	63.5469	0.001	70.0818	16.0968	0.00222338	0.0340717	101115477	annot_exons
Circ_007826	0	0	0	0	83.2905	105.481	35.8719	38.1282	0.001	65.6929	16.0034	0.00108178	0.0192008	101115477	annot_exons
Circ_007827	0	0	0	0	41.6453	39.5554	119.573	228.769	0.001	107.386	16.7124	0.000134206	0.00371069	101115477	annot_exons
Circ_007832	0	22.7433	50.574	0	97.1723	65.9257	167.402	139.803	18.3293	117.576	2.68137	0.00380705	0.0523113	101115477	annot_exons
Circ_007837	0	0	0	0	27.7635	39.5554	107.616	0	0.001	43.7336	15.4165	0.0275037	0.224271	101115477	annot_exons
Circ_007855	0	0	0	0	55.527	39.5554	131.53	152.513	0.001	94.7813	16.5323	9.79854e-05	0.00284252	101117011	annot_exons
Circ_007857	19.581	22.7433	0	0	27.7635	52.7405	35.8719	165.222	10.5811	70.3995	2.73408	0.0346027	0.262462	101117011	annot_exons
Circ_007875	117.486	45.4866	0	111.489	0	0	0	0	68.6153	0.001	-16.0662	0.00450018	0.0596302	101111736	annot_exons
Circ_007892	0	0	0	0	55.527	52.7405	107.616	114.384	0.001	82.5669	16.3333	0.000578228	0.0117131	NA	intergenic
Circ_007894	0	0	0	0	0	606.516	561.993	330.444	0.001	374.738	18.5155	6.60177e-06	0.000300748	101123657	exon_intron
Circ_007934	19.581	68.2299	75.861	27.8722	0	0	0	0	47.886	0.001	-15.5473	0.0118979	0.123856	101103915	exon_intron
Circ_007938	0	0	0	0	83.2905	39.5554	47.8292	63.5469	0.001	58.5555	15.8375	0.00118683	0.020742	101109732	one_exon
Circ_007948	0	0	0	0	27.7635	92.2959	0	76.2563	0.001	49.0789	15.5828	0.0130248	0.131872	101110262	annot_exons
Circ_007952	0	0	0	0	916.196	685.627	561.993	927.785	0.001	772.9	19.5599	2.39234e-19	1.85399e-16	101111312	exon_intron
Circ_007953	0	0	0	0	777.378	1028.44	514.163	355.863	0.001	668.961	19.3516	6.3415e-14	2.09764e-11	101111312	annot_exons
Circ_007956	0	0	0	0	0	105.481	35.8719	25.4188	0.001	41.6929	15.3475	0.0297582	0.235834	101111312	annot_exons
Circ_007959	0	0	0	0	97.1723	145.036	179.359	101.675	0.001	130.811	16.9971	6.60838e-06	0.000300748	101111312	annot_exons
Circ_007962	0	0	0	0	41.6453	26.3703	23.9146	76.2563	0.001	42.0466	15.3597	0.0117424	0.122594	101112922	annot_exons
Circ_007979	0	0	0	0	41.6453	39.5554	83.701	76.2563	0.001	60.2895	15.8796	0.00125877	0.0216919	101117444	antisense
Circ_007981	0	0	0	0	277.635	487.85	657.651	368.572	0.001	447.927	18.7729	9.43789e-13	2.53459e-10	101117444	one_exon
Circ_007982	0	0	0	0	277.635	461.48	705.48	381.282	0.001	456.469	18.8002	1.86427e-12	4.63913e-10	101117444	one_exon
Circ_007990	0	0	0	0	55.527	0	95.6583	63.5469	0.001	53.6831	15.7122	0.00702936	0.083588	101118295	annot_exons
Circ_007991	39.1619	0	0	0	138.818	92.2959	95.6583	165.222	9.79048	122.998	3.65112	0.000325019	0.00735263	101118295	annot_exons
Circ_007994	156.648	22.7433	25.287	111.489	0	0	23.9146	0	79.0417	5.97864	-3.72472	0.00508911	0.0655757	101120009	annot_exons
Circ_008006	97.9048	136.46	126.435	111.489	27.7635	0	47.8292	12.7094	118.072	22.0755	-2.41915	0.00120866	0.0210151	101103343	annot_exons
Circ_008009	254.553	90.9732	328.731	167.233	0	65.9257	35.8719	0	210.373	25.4494	-3.04724	0.000246148	0.0059189	101123065	annot_exons
Circ_008026	0	0	0	0	41.6453	79.1108	11.9573	25.4188	0.001	39.533	15.2708	0.0229988	0.197599	101108413	antisense
Circ_008032	0	0	0	0	55.527	39.5554	83.701	88.9657	0.001	66.9373	16.0305	0.000454945	0.00964058	101108075	antisense
Circ_008042	234.972	45.4866	177.009	195.106	13.8818	26.3703	0	76.2563	163.143	29.1271	-2.48571	0.00403565	0.0545677	101114047	annot_exons
Circ_008050	0	0	0	0	13.8818	0	95.6583	50.8375	0.001	40.0944	15.2911	0.0428673	0.302555	100135687	annot_exons
Circ_008055	19.581	0	0	0	166.581	79.1108	0	50.8375	4.89524	74.1324	3.92065	0.0107445	0.114692	101117354	one_exon
Circ_008059	0	0	0	0	83.2905	52.7405	0	50.8375	0.001	46.7172	15.5117	0.0139353	0.13795	101117354	exon_intron
Circ_008063	97.9048	22.7433	0	27.8722	235.99	131.851	143.487	355.863	37.1301	216.798	2.54569	0.00140243	0.0236859	101117867	annot_exons
Circ_008066	0	0	0	0	55.527	26.3703	83.701	63.5469	0.001	57.2863	15.8059	0.00151249	0.0251686	101117867	annot_exons
Circ_008071	0	45.4866	0	0	222.108	65.9257	59.7864	50.8375	11.3716	99.6644	3.13164	0.0101833	0.110132	101101915	annot_exons
Circ_008076	234.972	386.636	733.323	501.7	208.226	131.851	215.231	152.513	464.158	176.955	-1.39123	0.00482402	0.0627562	101102925	intronic
Circ_008080	0	0	0	0	0	26.3703	83.701	88.9657	0.001	49.7592	15.6027	0.0130385	0.131912	101121540	annot_exons
Circ_008100	0	90.9732	101.148	27.8722	0	0	0	0	54.9984	0.001	-15.7471	0.0149236	0.145099	101110084	antisense
Circ_008103	0	0	0	0	27.7635	26.3703	107.616	12.7094	0.001	43.6147	15.4125	0.0202151	0.181862	101110614	annot_exons
Circ_008111	0	0	0	0	83.2905	52.7405	0	12.7094	0.001	37.1851	15.1824	0.0435835	0.305792	101108334	exon_intron
Circ_008118	0	0	0	0	97.1723	79.1108	47.8292	63.5469	0.001	71.9148	16.134	0.000227868	0.00558574	101109637	annot_exons
Circ_008123	0	0	0	0	97.1723	0	71.7437	50.8375	0.001	54.9384	15.7455	0.00706732	0.0839658	101119845	antisense
Circ_008128	0	0	0	0	83.2905	39.5554	59.7864	76.2563	0.001	64.7222	15.982	0.000662748	0.0131119	105601951	antisense
Circ_008131	137.067	136.46	278.157	111.489	235.99	435.109	227.188	610.051	165.793	377.085	1.1855	0.0356441	0.267296	101110082	annot_exons
Circ_008133	0	0	0	0	83.2905	224.147	47.8292	228.769	0.001	146.009	17.1557	5.73481e-05	0.0018696	105613494	exon_intron
Circ_008139	0	0	0	0	527.507	540.59	251.103	305.025	0.001	406.056	18.6313	8.01762e-12	1.73976e-09	101114548	annot_exons
Circ_008147	0	0	0	0	694.088	448.295	382.633	444.829	0.001	492.461	18.9096	3.40598e-14	1.18441e-11	NA	intergenic
Circ_008155	97.9048	181.946	25.287	27.8722	0	0	0	0	83.2526	0.001	-16.3452	0.000712152	0.0138668	101107891	antisense
Circ_008156	450.362	45.4866	50.574	27.8722	0	0	0	12.7094	143.574	3.17735	-5.49783	0.000252721	0.00602885	101107891	exon_intron
Circ_008159	39.1619	113.716	278.157	55.7445	41.6453	0	23.9146	12.7094	121.695	19.5673	-2.63675	0.00825565	0.0942054	101117099	antisense
Circ_008160	117.486	45.4866	0	55.7445	0	0	0	0	54.6792	0.001	-15.7387	0.0118106	0.123117	101117099	exon_intron
Circ_008163	0	0	0	0	55.527	13.1851	35.8719	38.1282	0.001	35.678	15.1227	0.026667	0.219453	101109733	annot_exons
Circ_008166	0	0	0	0	0	39.5554	59.7864	88.9657	0.001	47.0769	15.5227	0.014901	0.144969	105601907	exon_intron
Circ_008172	0	0	0	0	69.4088	105.481	47.8292	25.4188	0.001	62.0344	15.9208	0.00125779	0.0216888	101120774	one_exon
Circ_008177	0	363.893	151.722	0	0	0	11.9573	0	128.904	2.98932	-5.43033	0.00269655	0.0396859	101123578	antisense
Circ_008199	39.1619	0	0	27.8722	166.581	105.481	131.53	88.9657	16.7585	123.14	2.87733	0.0017011	0.0276015	105602020	annot_exons
Circ_008210	0	0	0	0	27.7635	158.222	23.9146	25.4188	0.001	58.8296	15.8443	0.00596697	0.0742215	NA	intergenic
Circ_008216	0	0	0	0	97.1723	65.9257	59.7864	25.4188	0.001	62.0758	15.9217	0.00106172	0.018946	101118635	antisense
Circ_008230	0	0	0	0	69.4088	39.5554	71.7437	0	0.001	45.177	15.4633	0.0144339	0.141695	101118215	annot_exons
Circ_008245	0	0	0	0	41.6453	39.5554	23.9146	76.2563	0.001	45.3429	15.4686	0.00663323	0.0803842	101118215	annot_exons
Circ_008256	0	0	0	0	13.8818	13.1851	107.616	63.5469	0.001	49.5574	15.5968	0.0108038	0.115189	101118215	annot_exons
Circ_008271	39.1619	136.46	126.435	0	0	13.1851	0	0	75.5142	3.29628	-4.51784	0.00244943	0.0366254	101118215	annot_exons
Circ_008279	0	0	0	0	97.1723	0	71.7437	76.2563	0.001	61.2931	15.9034	0.00433803	0.0576788	101121882	annot_exons
Circ_008289	0	0	0	0	13.8818	65.9257	35.8719	76.2563	0.001	47.9839	15.5503	0.00828447	0.0944548	101122133	annot_exons
Circ_008290	39.1619	68.2299	25.287	83.6167	0	0	0	0	54.0739	0.001	-15.7226	0.00428145	0.0571226	101121117	one_exon
Circ_008303	39.1619	0	50.574	0	138.818	52.7405	107.616	63.5469	22.434	90.6802	2.0151	0.0458509	0.313739	101123404	annot_exons
Circ_008305	117.486	90.9732	0	0	0	0	0	0	52.1147	0.001	-15.6694	0.0282533	0.228474	101102008	annot_exons
Circ_008308	19.581	136.46	151.722	83.6167	0	0	0	12.7094	97.8449	3.17735	-4.9446	0.00018153	0.00470728	101102510	annot_exons
Circ_008331	176.229	68.2299	0	27.8722	0	0	0	0	68.0827	0.001	-16.055	0.00679145	0.0816484	101104337	annot_exons
Circ_008332	293.715	22.7433	25.287	111.489	0	26.3703	47.8292	0	113.308	18.5499	-2.61078	0.0269106	0.220888	101104337	annot_exons
Circ_008337	58.7429	22.7433	0	83.6167	0	0	0	0	41.2757	0.001	-15.333	0.035051	0.264531	101105597	annot_exons
Circ_008340	587.429	363.893	126.435	390.211	180.463	171.407	131.53	152.513	366.992	158.978	-1.20692	0.0278087	0.226172	101104855	annot_exons
Circ_008345	19.581	45.4866	227.583	139.361	13.8818	13.1851	11.9573	0	108.003	9.75604	-3.46863	0.00415538	0.0558249	101105847	annot_exons
Circ_008355	254.553	113.716	25.287	195.106	13.8818	65.9257	0	12.7094	147.165	23.1292	-2.66965	0.00713145	0.0844687	101106358	annot_exons
Circ_008370	0	0	0	0	27.7635	39.5554	83.701	25.4188	0.001	44.1097	15.4288	0.0116317	0.121908	101107134	annot_exons
Circ_008391	0	0	0	0	27.7635	65.9257	83.701	0	0.001	44.3475	15.4366	0.0229448	0.197322	101109209	annot_exons
Circ_008392	0	0	0	27.8722	69.4088	158.222	11.9573	190.641	6.96806	107.557	3.9482	0.00418275	0.0561092	101109209	annot_exons
Circ_008398	0	0	0	0	27.7635	65.9257	11.9573	76.2563	0.001	45.4757	15.4728	0.0101552	0.109991	NA	intergenic
Circ_008410	0	0	0	0	194.345	250.518	394.591	101.675	0.001	235.282	17.844	1.77538e-07	1.35268e-05	101115479	annot_exons
Circ_008417	0	113.716	126.435	83.6167	0	0	0	0	80.9421	0.001	-16.3046	0.00211714	0.032777	101115479	intronic
Circ_008423	0	0	50.574	27.8722	13.8818	290.073	167.402	38.1282	19.6116	127.371	2.69926	0.0295945	0.235264	NA	intergenic
Circ_008424	39.1619	0	0	0	69.4088	39.5554	47.8292	177.931	9.79048	83.6812	3.09545	0.0169955	0.159953	NA	intergenic
Circ_008427	58.7429	22.7433	0	27.8722	388.689	777.923	514.163	648.179	27.3396	582.239	4.41255	2.72413e-11	5.16709e-09	NA	intergenic
Circ_008448	19.581	45.4866	0	0	69.4088	39.5554	71.7437	241.478	16.2669	105.547	2.69787	0.0134954	0.13493	101118814	annot_exons
Circ_008457	58.7429	22.7433	50.574	27.8722	0	0	0	0	39.9831	0.001	-15.2871	0.0150827	0.146108	101123231	annot_exons
Circ_008476	78.3239	68.2299	101.148	55.7445	0	26.3703	0	12.7094	75.8616	9.76991	-2.95695	0.0068055	0.0816697	106991617	antisense
Circ_008500	0	0	0	0	13.8818	65.9257	23.9146	63.5469	0.001	41.8172	15.3518	0.0142019	0.139874	101110865	annot_exons
Circ_008529	0	0	0	0	27.7635	65.9257	83.701	127.094	0.001	76.121	16.216	0.000301972	0.00695469	101112344	one_exon
Circ_008534	0	0	0	0	0	79.1108	23.9146	76.2563	0.001	44.8204	15.4519	0.0184191	0.169816	NA	intergenic
Circ_008546	0	0	0	0	13.8818	79.1108	23.9146	50.8375	0.001	41.9362	15.3559	0.014933	0.145125	NA	intergenic
Circ_008553	0	0	0	0	69.4088	92.2959	107.616	114.384	0.001	95.9262	16.5496	0.000102544	0.00295267	101116170	annot_exons
Circ_008556	58.7429	181.946	25.287	0	0	0	0	0	66.4941	0.001	-16.0209	0.00767789	0.0893032	101116170	annot_exons
Circ_008560	78.3239	45.4866	25.287	55.7445	263.753	158.222	107.616	139.803	51.2105	167.348	1.70834	0.0128136	0.130268	101116170	annot_exons
Circ_008565	0	0	0	0	1082.78	1292.14	1410.96	1169.26	0.001	1238.79	20.2405	1.35051e-31	3.66314e-28	100170328	antisense
Circ_008568	234.972	45.4866	50.574	0	27.7635	0	0	0	82.7581	6.94088	-3.57571	0.0119788	0.124354	101117786	annot_exons
Circ_008570	0	22.7433	101.148	55.7445	0	0	0	0	44.9089	0.001	-15.4547	0.0302177	0.237986	101117786	annot_exons
Circ_008571	0	113.716	25.287	27.8722	0	0	0	0	41.7189	0.001	-15.3484	0.045194	0.31097	101117786	annot_exons
Circ_008575	39.1619	0	0	0	194.345	276.888	179.359	241.478	9.79048	223.018	4.50963	1.71442e-07	1.32309e-05	101121291	annot_exons
Circ_008580	137.067	90.9732	101.148	83.6167	166.581	527.405	370.676	521.085	103.201	396.437	1.94163	0.000602101	0.0121063	101121291	annot_exons
Circ_008583	0	0	0	0	27.7635	171.407	23.9146	0	0.001	55.7712	15.7672	0.0180767	0.167502	101121291	exon_intron
Circ_008587	97.9048	45.4866	0	83.6167	0	13.1851	0	0	56.752	3.29628	-4.10576	0.0288173	0.231265	101118300	annot_exons
Circ_008591	587.429	295.663	455.166	445.956	208.226	158.222	227.188	165.222	446.053	189.715	-1.23339	0.00214042	0.0330808	101118556	annot_exons
Circ_008592	19.581	90.9732	126.435	222.978	0	13.1851	0	25.4188	114.992	9.65098	-3.57471	0.00215847	0.0332838	101118556	annot_exons
Circ_008603	78.3239	113.716	126.435	167.233	41.6453	0	71.7437	0	121.427	28.3472	-2.09881	0.012387	0.127218	101122131	one_exon
Circ_008609	19.581	45.4866	227.583	250.85	0	13.1851	0	12.7094	135.875	6.47363	-4.39156	0.000687248	0.0134884	101122304	annot_exons
Circ_008619	215.391	363.893	303.444	334.467	83.2905	39.5554	83.701	63.5469	304.299	67.5235	-2.17203	1.38102e-05	0.000559921	101123068	annot_exons
Circ_008620	97.9048	159.203	0	111.489	0	13.1851	0	25.4188	92.1492	9.65098	-3.25522	0.0102384	0.110508	101123068	annot_exons
Circ_008638	0	22.7433	25.287	0	97.1723	92.2959	71.7437	76.2563	12.0076	84.3671	2.81274	0.00387234	0.0529135	101123580	one_exon
Circ_008642	0	0	25.287	0	41.6453	65.9257	95.6583	127.094	6.32175	82.5808	3.70741	0.00267206	0.0393683	101123580	annot_exons
Circ_008645	19.581	68.2299	50.574	0	0	0	0	0	34.5962	0.001	-15.0783	0.0485662	0.324457	101102010	annot_exons
Circ_008663	234.972	636.812	429.879	334.467	69.4088	79.1108	11.9573	25.4188	409.032	46.4739	-3.13772	1.85166e-06	0.000101875	101108250	annot_exons
Circ_008671	0	0	0	0	41.6453	26.3703	71.7437	0	0.001	34.9398	15.0926	0.0461067	0.314466	101111828	annot_exons
Circ_008682	19.581	0	25.287	0	124.936	13.1851	107.616	216.06	11.217	115.449	3.3635	0.00465164	0.061159	NA	intergenic
Circ_008685	0	0	0	0	0	65.9257	35.8719	38.1282	0.001	34.9814	15.0943	0.0421461	0.298946	NA	intergenic
Circ_008686	0	0	0	0	0	39.5554	35.8719	88.9657	0.001	41.0982	15.3268	0.0242568	0.204711	NA	intergenic
Circ_008691	0	136.46	126.435	278.722	0	0	0	0	135.404	0.001	-17.0469	0.000236426	0.00572572	NA	intergenic
Circ_008694	39.1619	68.2299	227.583	195.106	0	0	0	0	132.52	0.001	-17.0159	3.83745e-05	0.00134828	NA	intergenic
Circ_008696	0	181.946	278.157	222.978	0	0	0	12.7094	170.77	3.17735	-5.74809	6.40697e-05	0.00203492	101109643	antisense
Circ_008698	19.581	0	328.731	696.806	41.6453	0	0	0	261.279	10.4113	-4.64937	0.00412824	0.055598	101109643	exon_intron
Circ_008699	58.7429	113.716	632.175	1365.74	0	13.1851	0	0	542.594	3.29628	-7.36289	6.05299e-07	3.78298e-05	101109643	antisense
Circ_008703	176.229	22.7433	177.009	111.489	0	0	0	25.4188	121.867	6.35469	-4.26135	0.000299827	0.00692128	101109643	antisense
Circ_008709	0	0	0	0	55.527	13.1851	47.8292	101.675	0.001	54.5541	15.7354	0.00421854	0.056422	101110446	annot_exons
Circ_008715	0	0	50.574	0	124.936	105.481	71.7437	177.931	12.6435	120.023	3.24684	0.000785185	0.0149665	101103179	annot_exons
Circ_008726	117.486	136.46	101.148	55.7445	319.28	171.407	334.804	368.572	102.71	298.516	1.53924	0.00351576	0.0490291	101117360	annot_exons
Circ_008728	137.067	204.69	101.148	27.8722	0	13.1851	11.9573	0	117.694	6.28561	-4.22685	0.000213485	0.00529787	101117360	annot_exons
Circ_008736	39.1619	45.4866	354.018	139.361	55.527	26.3703	0	0	144.507	20.4743	-2.81925	0.00923447	0.102402	101118472	annot_exons
Circ_008740	0	0	0	0	0	105.481	23.9146	25.4188	0.001	38.7036	15.2402	0.0443849	0.308849	101121966	annot_exons
Circ_008765	0	0	0	0	55.527	26.3703	0	50.8375	0.001	33.1837	15.0182	0.0445497	0.309169	101105438	annot_exons
Circ_008783	0	0	0	0	27.7635	39.5554	23.9146	88.9657	0.001	45.0498	15.4592	0.00852569	0.0962743	101107131	annot_exons
Circ_008785	137.067	90.9732	0	27.8722	0	0	0	0	63.978	0.001	-15.9653	0.00764245	0.0889673	101107383	annot_exons
Circ_008799	58.7429	22.7433	126.435	83.6167	13.8818	0	0	38.1282	72.8845	13.0025	-2.48682	0.0332487	0.254608	101108687	annot_exons
Circ_008815	0	0	0	0	41.6453	52.7405	59.7864	88.9657	0.001	60.7845	15.8914	0.00112069	0.0197651	101110537	annot_exons
Circ_008819	0	0	0	0	124.936	118.666	71.7437	76.2563	0.001	97.9005	16.579	0.000125991	0.0035336	101110537	annot_exons
Circ_008837	0	0	0	0	55.527	26.3703	119.573	63.5469	0.001	66.2543	16.0157	0.000857089	0.0160772	101111830	annot_exons
Circ_008843	19.581	0	0	0	27.7635	52.7405	227.188	50.8375	4.89524	89.6325	4.19457	0.00301422	0.043258	101111830	annot_exons
Circ_008844	0	0	0	83.6167	138.818	145.036	286.975	139.803	20.9042	177.658	3.08724	0.000690652	0.0135356	101111830	annot_exons
Circ_008850	0	0	0	0	41.6453	65.9257	35.8719	63.5469	0.001	51.7474	15.6592	0.00304384	0.0435679	101111830	annot_exons
Circ_008864	0	0	0	0	152.699	79.1108	95.6583	88.9657	0.001	104.109	16.6677	6.276e-05	0.00201216	101119754	antisense
Circ_008867	78.3239	45.4866	75.861	27.8722	0	0	11.9573	12.7094	56.8859	6.16667	-3.20551	0.0102264	0.110423	101121881	annot_exons
Circ_008871	97.9048	181.946	303.444	111.489	0	26.3703	0	88.9657	173.696	28.834	-2.59072	0.00375072	0.0516944	101122625	annot_exons
Circ_008893	78.3239	136.46	252.87	0	0	26.3703	0	12.7094	116.913	9.76991	-3.58095	0.00522479	0.0669425	101123406	annot_exons
Circ_008940	0	45.4866	0	0	208.226	79.1108	322.847	50.8375	11.3716	165.255	3.86118	0.000814116	0.0154097	101109386	antisense
Circ_008942	1292.34	432.123	986.193	808.295	69.4088	13.1851	35.8719	0	879.739	29.6164	-4.8926	1.04527e-11	2.14786e-09	NA	intergenic
Circ_008946	0	22.7433	25.287	0	138.818	13.1851	71.7437	127.094	12.0076	87.7101	2.8688	0.0122275	0.126058	101110359	annot_exons
Circ_008993	0	159.203	25.287	83.6167	13.8818	0	0	0	67.0267	3.47044	-4.27155	0.0267037	0.219688	101117963	annot_exons
Circ_008996	215.391	204.69	480.453	278.722	83.2905	92.2959	35.8719	0	294.814	52.8646	-2.47943	0.000239574	0.00577874	101117963	annot_exons
Circ_008997	763.658	591.326	910.332	362.339	180.463	158.222	71.7437	165.222	656.914	143.913	-2.19051	6.44212e-06	0.000296163	101117963	annot_exons
Circ_008998	176.229	45.4866	126.435	0	208.226	329.628	286.975	521.085	87.0376	336.479	1.9508	0.00757916	0.0883063	101117963	annot_exons
Circ_009000	176.229	90.9732	75.861	27.8722	13.8818	0	0	25.4188	92.7338	9.82513	-3.23855	0.0031671	0.044973	101117963	annot_exons
Circ_009003	0	0	0	0	41.6453	65.9257	47.8292	12.7094	0.001	42.0274	15.359	0.0121168	0.125234	101114808	annot_exons
Circ_009052	19.581	22.7433	101.148	111.489	27.7635	0	0	12.7094	63.7403	10.1182	-2.65525	0.0385606	0.282851	101121201	annot_exons
Circ_009064	0	0	0	0	124.936	158.222	131.53	114.384	0.001	132.268	17.0131	3.06467e-06	0.000155959	101107629	annot_exons
Circ_009092	0	0	0	0	69.4088	52.7405	23.9146	25.4188	0.001	42.8707	15.3877	0.0110854	0.117545	101113527	annot_exons
Circ_009093	0	22.7433	0	0	680.206	764.738	550.035	826.11	5.68582	705.272	6.95467	1.63338e-18	1.08058e-15	101113527	annot_exons
Circ_009094	0	0	0	0	152.699	237.332	227.188	305.025	0.001	230.561	17.8148	3.84716e-09	4.38447e-07	101113527	annot_exons
Circ_009102	783.239	796.015	910.332	1505.1	4733.68	6882.64	4125.26	8489.87	998.672	6057.86	2.60073	3.21037e-10	4.63181e-08	101115229	annot_exons
Circ_009105	19.581	45.4866	50.574	83.6167	0	0	11.9573	0	49.8146	2.98932	-4.05868	0.00680588	0.0816697	101116255	exon_intron
Circ_009113	19.581	0	0	0	97.1723	118.666	35.8719	25.4188	4.89524	69.2823	3.82303	0.0161801	0.154151	101103923	annot_exons
Circ_009127	0	0	0	0	69.4088	26.3703	107.616	12.7094	0.001	54.026	15.7214	0.0058699	0.0733035	NA	intergenic
Circ_009130	0	68.2299	0	0	249.872	92.2959	227.188	190.641	17.0575	189.999	3.47752	0.000291328	0.00677577	NA	intergenic
Circ_009142	0	0	0	55.7445	83.2905	92.2959	23.9146	63.5469	13.9361	65.762	2.23843	0.0472313	0.319158	101104011	annot_exons
Circ_009144	0	0	0	0	27.7635	65.9257	23.9146	114.384	0.001	57.9971	15.8237	0.00295223	0.0425432	101104011	annot_exons
Circ_009155	313.295	272.92	177.009	111.489	69.4088	79.1108	0	25.4188	218.678	43.4846	-2.33023	0.00102788	0.0184944	101104527	annot_exons
Circ_009160	117.486	90.9732	252.87	167.233	13.8818	0	0	0	157.141	3.47044	-5.50079	6.56473e-07	4.06534e-05	101104527	annot_exons
Circ_009161	2056	1864.95	960.906	1198.51	138.818	342.813	143.487	139.803	1520.09	191.23	-2.99077	2.4905e-09	3.01572e-07	101104527	annot_exons
Circ_009162	254.553	90.9732	151.722	55.7445	13.8818	0	0	0	138.248	3.47044	-5.316	6.51823e-06	0.00029865	101104527	annot_exons
Circ_009163	234.972	136.46	126.435	222.978	13.8818	13.1851	0	0	180.211	6.76672	-4.73509	3.76731e-07	2.51686e-05	101104527	annot_exons
Circ_009166	822.401	409.379	328.731	501.7	319.28	92.2959	239.146	139.803	515.553	197.631	-1.38331	0.00903962	0.100653	101104527	annot_exons
Circ_009167	841.982	818.759	480.453	836.167	277.635	290.073	251.103	279.607	744.34	274.604	-1.43861	2.81328e-05	0.00102426	101104527	annot_exons
Circ_009183	0	0	0	0	69.4088	39.5554	23.9146	12.7094	0.001	36.397	15.1515	0.0217439	0.190326	101104527	annot_exons
Circ_009210	0	0	0	0	41.6453	39.5554	143.487	25.4188	0.001	62.5267	15.9322	0.00238866	0.0359745	NA	intergenic
Circ_009228	313.295	295.663	101.148	250.85	97.1723	105.481	83.701	63.5469	240.239	87.4753	-1.45752	0.00807987	0.0926283	101111659	exon_intron
Circ_009244	0	0	0	0	13.8818	224.147	239.146	12.7094	0.001	122.471	16.9021	0.000687897	0.0134913	NA	intergenic
Circ_009245	0	0	0	0	83.2905	52.7405	35.8719	63.5469	0.001	58.8625	15.8451	0.00121202	0.0210601	NA	intergenic
Circ_009248	274.134	363.893	227.583	334.467	97.1723	79.1108	191.317	177.931	300.019	136.383	-1.13739	0.0155313	0.149375	101114903	annot_exons
Circ_009258	254.553	295.663	556.314	222.978	138.818	105.481	119.573	152.513	332.377	129.096	-1.36438	0.00772791	0.0897311	101115311	annot_exons
Circ_009269	411.2	272.92	278.157	306.595	0	39.5554	0	88.9657	317.218	32.1303	-3.30347	3.84242e-06	0.000190186	101117279	annot_exons
Circ_009288	0	0	0	0	41.6453	184.592	107.616	101.675	0.001	108.882	16.7324	0.000156028	0.00416194	101121455	one_exon
Circ_009299	822.401	636.812	733.323	1644.46	235.99	118.666	370.676	114.384	959.249	209.929	-2.192	9.42633e-05	0.00275388	101122306	annot_exons
Circ_009302	0	136.46	126.435	83.6167	0	0	0	0	86.6279	0.001	-16.4025	0.00120612	0.0209979	101122552	annot_exons
Circ_009310	97.9048	68.2299	25.287	111.489	0	0	0	0	75.7277	0.001	-16.2085	0.000707622	0.0138083	101123325	exon_intron
Circ_009320	97.9048	181.946	151.722	27.8722	13.8818	13.1851	11.9573	0	114.861	9.75604	-3.55745	0.000821685	0.0155205	101123582	annot_exons
Circ_009326	176.229	22.7433	0	0	0	0	0	0	49.743	0.001	-15.6022	0.0476198	0.320825	101103840	annot_exons
Circ_009327	0	0	0	27.8722	69.4088	145.036	47.8292	12.7094	6.96806	68.7459	3.30245	0.0231728	0.198775	101103840	annot_exons
Circ_009349	0	0	0	0	97.1723	197.777	131.53	114.384	0.001	135.216	17.0449	5.30194e-06	0.000250977	101105601	annot_exons
Circ_009350	0	0	0	0	0	52.7405	23.9146	152.513	0.001	57.2919	15.806	0.0132485	0.133539	101105601	one_exon
Circ_009365	156.648	272.92	303.444	306.595	111.054	39.5554	83.701	50.8375	259.901	71.287	-1.86625	0.000651798	0.0129277	101106794	annot_exons
Circ_009387	19.581	113.716	75.861	55.7445	13.8818	0	0	0	66.2257	3.47044	-4.2542	0.0020789	0.0323511	101111125	annot_exons
Circ_009392	548.267	1137.16	455.166	752.55	111.054	65.9257	47.8292	76.2563	723.287	75.2663	-3.26449	2.44713e-09	2.98991e-07	101112260	antisense
Circ_009410	1311.92	1296.37	1213.78	780.423	458.098	303.258	573.95	482.957	1150.62	454.566	-1.33985	8.96514e-05	0.0026547	101115312	annot_exons
Circ_009414	1664.38	682.299	1491.93	473.828	388.689	382.369	609.822	508.375	1078.11	472.314	-1.19069	0.0180816	0.167502	101115312	annot_exons
Circ_009415	548.267	636.812	1011.48	557.445	208.226	303.258	179.359	139.803	688.501	207.662	-1.72922	5.41177e-05	0.00177711	101115312	exon_intron
Circ_009433	0	0	0	0	69.4088	52.7405	23.9146	25.4188	0.001	42.8707	15.3877	0.0110825	0.117545	101116347	annot_exons
Circ_009434	0	0	0	0	97.1723	0	35.8719	114.384	0.001	61.8572	15.9167	0.00487384	0.063374	101116347	annot_exons
Circ_009437	0	0	0	0	471.98	197.777	609.822	622.76	0.001	475.585	18.8593	1.565e-11	3.14438e-09	101116347	annot_exons
Circ_009438	0	0	0	0	680.206	501.035	837.01	826.11	0.001	711.09	19.4397	1.09828e-18	7.63841e-16	101116347	annot_exons
Circ_009439	0	0	0	0	1235.48	369.184	1159.86	1474.29	0.001	1059.7	20.0152	8.172e-15	3.16654e-12	101116347	annot_exons
Circ_009443	0	0	0	0	124.936	39.5554	59.7864	76.2563	0.001	75.1335	16.1972	0.000224622	0.00551871	101116347	annot_exons
Circ_009446	0	0	0	0	27.7635	52.7405	59.7864	12.7094	0.001	38.25	15.2232	0.0195379	0.177121	101116347	annot_exons
Circ_009448	0	0	0	0	263.753	355.999	155.445	38.1282	0.001	203.331	17.6335	1.35947e-05	0.000553182	101116347	annot_exons
Circ_009449	0	0	0	0	27.7635	26.3703	47.8292	25.4188	0.001	31.8454	14.9588	0.0238556	0.202421	101116347	annot_exons
Circ_009450	0	0	0	0	138.818	210.962	155.445	139.803	0.001	161.257	17.299	2.9916e-07	2.07e-05	101116347	annot_exons
Circ_009451	0	0	0	0	124.936	250.518	119.573	279.607	0.001	193.658	17.5632	3.991e-07	2.64675e-05	101116347	annot_exons
Circ_009469	0	0	0	0	194.345	0	0	76.2563	0.001	67.6502	16.0458	0.0153152	0.147727	101120603	annot_exons
Circ_009471	0	0	0	0	83.2905	79.1108	59.7864	50.8375	0.001	68.2563	16.0587	0.000348976	0.00776508	101120603	annot_exons
Circ_009473	137.067	90.9732	25.287	55.7445	222.108	197.777	227.188	177.931	77.2679	206.251	1.41646	0.0153046	0.147678	101120603	annot_exons
Circ_009503	0	0	0	0	41.6453	92.2959	23.9146	152.513	0.001	77.5921	16.2436	0.00064698	0.0128468	101116864	annot_exons
Circ_009521	58.7429	22.7433	25.287	250.85	0	0	0	0	89.4058	0.001	-16.4481	0.00151907	0.0252316	101103425	annot_exons
Circ_009522	156.648	295.663	177.009	0	0	13.1851	0	25.4188	157.33	9.65098	-4.02697	0.00123666	0.021405	101103425	annot_exons
Circ_009526	254.553	272.92	177.009	222.978	27.7635	39.5554	59.7864	12.7094	231.865	34.9537	-2.72977	6.14133e-06	0.000283778	101104604	annot_exons
Circ_009528	39.1619	68.2299	50.574	0	0	0	0	0	39.4915	0.001	-15.2693	0.0284173	0.22942	101105528	annot_exons
Circ_009530	234.972	909.732	455.166	836.167	124.936	39.5554	47.8292	0	609.009	53.0801	-3.52022	4.64851e-06	0.000224752	101105528	annot_exons
Circ_009531	19.581	45.4866	101.148	0	0	0	0	0	41.5539	0.001	-15.3427	0.038896	0.284447	101105528	annot_exons
Circ_009537	156.648	22.7433	75.861	222.978	55.527	0	11.9573	0	119.557	16.8711	-2.82508	0.014792	0.144116	101106364	annot_exons
Circ_009538	19.581	68.2299	50.574	83.6167	13.8818	0	0	0	55.5004	3.47044	-3.99931	0.0200575	0.180924	101106364	annot_exons
Circ_009539	19.581	68.2299	50.574	0	0	0	0	0	34.5962	0.001	-15.0783	0.0485656	0.324457	101106364	annot_exons
Circ_009555	274.134	636.812	505.74	334.467	194.345	79.1108	83.701	88.9657	437.788	111.531	-1.97279	0.000184375	0.00474152	101107551	annot_exons
Circ_009592	548.267	591.326	480.453	613.189	208.226	158.222	143.487	241.478	558.309	187.853	-1.57146	4.7304e-06	0.000227673	101108516	annot_exons
Circ_009596	78.3239	136.46	75.861	83.6167	0	79.1108	0	12.7094	93.5653	22.955	-2.02716	0.037211	0.275874	101108516	annot_exons
Circ_009605	39.1619	159.203	75.861	111.489	13.8818	26.3703	11.9573	25.4188	96.4287	19.407	-2.31288	0.0101341	0.109907	101117878	annot_exons
Circ_009627	19.581	90.9732	151.722	111.489	13.8818	0	0	0	93.4413	3.47044	-4.75087	0.000219803	0.00542867	101112675	annot_exons
Circ_009645	0	0	0	0	69.4088	39.5554	0	38.1282	0.001	36.7731	15.1664	0.03004	0.237207	101115313	annot_exons
Circ_009648	19.581	181.946	0	111.489	0	0	0	0	78.2541	0.001	-16.2559	0.00495658	0.064173	101119422	annot_exons
Circ_009652	567.848	454.866	657.462	222.978	41.6453	79.1108	71.7437	50.8375	475.789	60.8343	-2.96736	2.58449e-07	1.84478e-05	101115572	annot_exons
Circ_009659	0	0	0	0	13.8818	26.3703	83.701	25.4188	0.001	37.343	15.1885	0.0249546	0.209346	101118385	annot_exons
Circ_009675	0	0	0	0	55.527	52.7405	0	25.4188	0.001	33.4216	15.0285	0.045194	0.31097	101120357	exon_intron
Circ_009676	0	0	0	0	41.6453	79.1108	23.9146	114.384	0.001	64.7638	15.9829	0.00148607	0.0247976	101120357	annot_exons
Circ_009701	39.1619	0	50.574	27.8722	152.699	184.592	35.8719	101.675	29.402	118.71	2.01345	0.0192375	0.17531	101121119	annot_exons
Circ_009742	430.781	22.7433	177.009	55.7445	13.8818	0	0	38.1282	171.57	13.0025	-3.72193	0.00259509	0.0383384	100642181	annot_exons
Circ_009763	0	0	0	0	124.936	65.9257	95.6583	139.803	0.001	106.581	16.7016	6.45439e-05	0.00204759	101109828	annot_exons
Circ_009765	1781.87	2319.82	2478.13	3093.82	194.345	250.518	275.018	292.316	2418.41	253.049	-3.25657	9.05678e-22	9.82625e-19	NA	intergenic
Circ_009767	411.2	1341.85	1213.78	1142.76	111.054	92.2959	346.761	101.675	1027.4	162.947	-2.65652	1.93647e-05	0.000746091	NA	intergenic
Circ_009772	97.9048	68.2299	0	27.8722	0	13.1851	11.9573	0	48.5017	6.28561	-2.94791	0.0490967	0.326958	101120953	annot_exons
Circ_009805	58.7429	45.4866	101.148	222.978	69.4088	13.1851	0	0	107.089	20.6485	-2.3747	0.0231952	0.198797	101122892	annot_exons
Circ_009811	39.1619	68.2299	0	83.6167	0	0	0	0	47.7521	0.001	-15.5433	0.0212786	0.188284	101103349	annot_exons
Circ_009814	176.229	432.123	227.583	167.233	0	13.1851	0	0	250.792	3.29628	-6.24951	3.83462e-09	4.38447e-07	101103593	annot_exons
Circ_009816	176.229	113.716	328.731	167.233	69.4088	26.3703	11.9573	0	196.477	26.9341	-2.86686	0.000205202	0.00512515	101103593	annot_exons
Circ_009825	39.1619	45.4866	101.148	27.8722	13.8818	13.1851	11.9573	0	53.4172	9.75604	-2.45294	0.0453322	0.311596	101104688	annot_exons
Circ_009836	0	0	0	0	55.527	52.7405	95.6583	127.094	0.001	82.7549	16.3366	0.000618261	0.012367	101105280	one_exon
Circ_009838	0	0	0	0	13.8818	26.3703	23.9146	50.8375	0.001	28.751	14.8113	0.0444407	0.309081	101105280	exon_intron
Circ_009840	0	0	0	0	194.345	0	23.9146	50.8375	0.001	67.2742	16.0378	0.00750206	0.0877473	101105280	exon_intron
Circ_009858	58.7429	90.9732	101.148	55.7445	0	0	0	50.8375	76.6521	12.7094	-2.59243	0.021824	0.19083	101106365	annot_exons
[truncated: 2,847 more rows]

## Sheet: Table S6
Table S6 List of differentially expressed circRNAs between 1Y and 3Y.
[truncated: 415 more rows]

[truncated: 3 more sheets: Table S7, Table S8, Table S9]
